# Supplementary material for: Insight into the electronic effect of phosphine ligand on Rh catalyzed CO2 hydrogenation by investigating the reaction mechanism
Source: Royal Society of Chemistry journal article supplement (doi:10.1039/c5cp07256e), 2016-01-01
Supplement: c5cp07256e1.pdf [file c5cp07256e1.pdf]

# **Insight into the Electronic Effect of Phosphine Ligand on Rh Catalyzed CO<sub>2</sub> Hydrogenation by Investigating the Reaction Mechanism**

Shao-Fei Ni, Li Dang\*

Department of Chemistry in Southern University of Science and Technology, Shenzhen,  
518055, P. R. China

E-mail: dang.l@sustc.edu.cn

## **Complete Reference 44**

Gaussian 09, Frisch, M. J.; Trucks, G. W.; Schlegel, H. B.; Scuseria, G. E.; Robb, M. A.; Cheeseman, J. R.; Scalmani, G.; Barone, V.; Mennucci, B.; Petersson, G. A.; Nakatsuji, H.; Caricato, M.; Li, X.; Hratchian, H. P.; Izmaylov, A. F.; Bloino, J.; Zheng, G.; Sonnenberg, J. L.; Hada, M.; Ehara, M.; Toyota, K.; Fukuda, R.; Hasegawa, J.; Ishida, M.; Nakajima, T.; Honda, Y.; Kitao, O.; Nakai, H.; Vreven, T.; Montgomery, Jr., J. A.; Peralta, J. E.; Ogliaro, F.; Bearpark, M.; Heyd, J. J.; Brothers, E.; Kudin, K. N.; Staroverov, V. N.; Kobayashi, R.; Normand, J.; Raghavachari, K.; Rendell, A.; Burant, J. C.; Iyengar, S. S.; Tomasi, J.; Cossi, M.; Rega, N.; Millam, N. J.; Klene, M.; Knox, J. E.; Cross, J. B.; Bakken, V.; Adamo, C.; Jaramillo, J.; Gomperts, R.; Stratmann, R. E.; Yazyev, O.; Austin, A. J.; Cammi, R.; Pomelli, C.; Ochterski, J. W.; Martin, R. L.; Morokuma, K.; Zakrzewski, V. G.; Voth, G. A.; Salvador, P.; Dannenberg, J. J.; Dapprich, S.; Daniels, A. D.; Farkas, Ö.; Foresman, J. B.; Ortiz, J. V.; Cioslowski, J.; Fox, D. J. Gaussian, Inc., Wallingford CT, 2009.

Table S1. Selected bond distances (Å) and angles (°) for catalyst  $[\text{Rh}(\text{PN}^{\text{Me}}\text{P})_2]^+$  from both experimental and theoretical investigations.

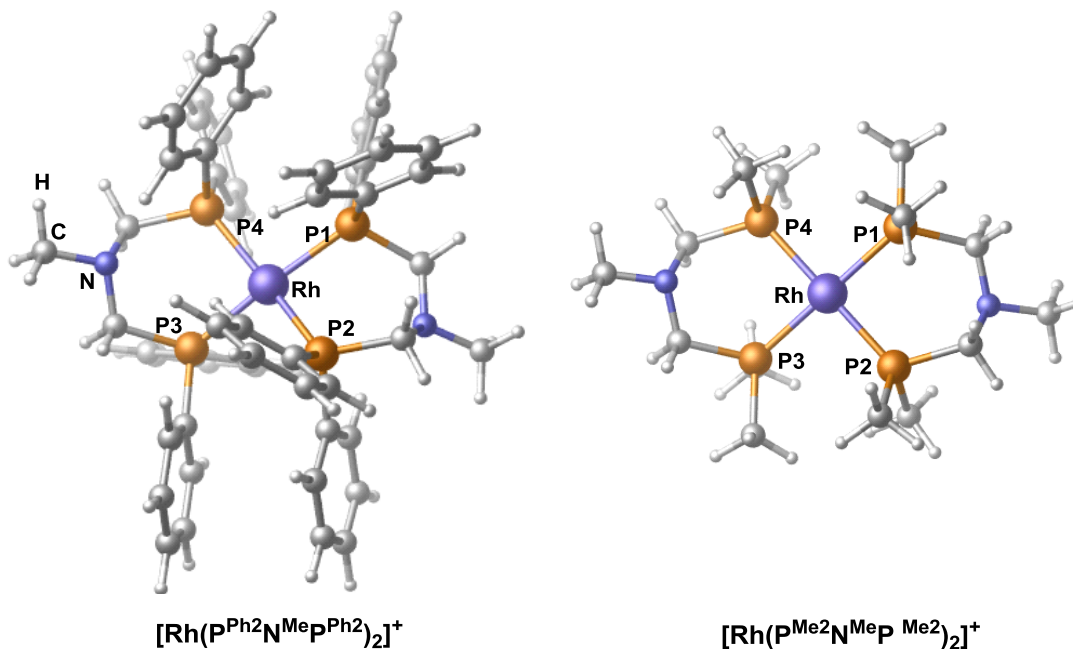

| Parameters   | $[\text{Rh}(\text{P}^{\text{Ph}_2\text{N}^{\text{Me}}\text{P}^{\text{Ph}_2})_2]^+$ |             | $[\text{Rh}(\text{P}^{\text{Me}_2\text{N}^{\text{Me}}\text{P}^{\text{Me}_2})_2]^+$ |        |
|--------------|------------------------------------------------------------------------------------|-------------|------------------------------------------------------------------------------------|--------|
|              | Experimental <sup>a</sup>                                                          | Theoretical | Theoretical                                                                        |        |
| Bond (Å)     | Rh-P1                                                                              | 2.3268      | 2.358                                                                              | 2.3416 |
|              | Rh-P2                                                                              | 2.3405      | 2.349                                                                              | 2.3443 |
|              | Rh-P3                                                                              | 2.3268      | 2.350                                                                              | 2.3416 |
|              | Rh-P4                                                                              | 2.3405      | 2.357                                                                              | 2.3443 |
| Angle (°)    | P1-Rh-P2                                                                           | 88.02       | 85.87                                                                              | 87.02  |
|              | P2-Rh-P3                                                                           | 91.98       | 94.75                                                                              | 92.97  |
|              | P3-Rh-P4                                                                           | 88.02       | 86.82                                                                              | 87.02  |
|              | P4-Rh-P5                                                                           | 91.98       | 94.80                                                                              | 92.97  |
|              | P1-Rh-P3                                                                           | 180.00      | 171.31                                                                             | 179.99 |
|              | P2-Rh-P4                                                                           | 180.00      | 166.23                                                                             | 179.99 |
| Dihedral (°) | P1-P2-P3-P4                                                                        | 0.00        | -17.03                                                                             | 0.002  |

<sup>a</sup> ref. 42

Table S2. The  $\Delta E_{\text{gas}}$ ,  $\Delta G_{\text{gas}}$ , and,  $\Delta E_{\text{sol}}$  of the species involved in the **A1** catalyzed  $\text{CO}_2$  hydrogenation.

| Species                 | $\Delta E_{\text{gas}}$ | $\Delta G_{\text{gas}}$ | $\Delta E_{\text{sol}}$ |
|-------------------------|-------------------------|-------------------------|-------------------------|
| <b>A1</b>               | 0.0                     | 0.0                     | 0.0                     |
| <b>A1-H<sub>2</sub></b> | -1.1                    | 8.7                     | 8.6                     |
| <b>A2</b>               | -11.3                   | 0.3                     | -11.5                   |
| <b>A3</b>               | -28.8                   | -1.4                    | -21.8                   |
| <b>A4</b>               | -16.7                   | 12.3                    | -18.7                   |
| <b>A5</b>               | 3.7                     | 15.8                    | -6.0                    |
| <b>A6</b>               | 0.5                     | 20.5                    | -8.0                    |
| <b>A7</b>               | -11.2                   | 17.3                    | -27.8                   |
| <b>A8</b>               | -0.3                    | 22.6                    | -8.1                    |
| <b>A9</b>               | -2.8                    | 24.7                    | -23.0                   |
| <b>A10</b>              | -13.3                   | 8.1                     | -12.6                   |
| <b>A11</b>              | -15.9                   | 11.7                    | -18.6                   |
| <b>A12</b>              | 177.8                   | 187.8                   | 23.3                    |
| <b>A13</b>              | -33.8                   | 9.5                     | -30.2                   |
| <b>A14</b>              | -38.5                   | 3.4                     | -43.4                   |
| <b>A7'</b>              | 7.9                     | 21.7                    | -12.9                   |
| <b>A8'</b>              | 9.1                     | 25.4                    | -13.1                   |
| <b>TSA1-2</b>           | -0.8                    | 8.6                     | -0.7                    |
| <b>TSA3-4</b>           | -1.0                    | 25.9                    | 2.2                     |
| <b>TSA6-7</b>           | 9.5                     | 32.3                    | -1.5                    |
| <b>TSA8-9</b>           | 3.3                     | 29.2                    | -6.1                    |
| <b>TSA9-7</b>           | 10.3                    | 36.5                    | -6.9                    |
| <b>TSA10-11</b>         | 23.7                    | 47.6                    | 11.2                    |
| <b>TSA13-14</b>         | -11.0                   | 30.6                    | -9.2                    |
| <b>TSA7-8'</b>          | 18.8                    | 38.8                    | 2.4                     |

Table S3. The  $\Delta E_{\text{gas}}$ ,  $\Delta G_{\text{gas}}$ , and,  $\Delta E_{\text{sol}}$  of the species involved in the **B1** catalyzed CO<sub>2</sub> hydrogenation.

| Species                 | $\Delta E_{\text{gas}}$ | $\Delta G_{\text{gas}}$ | $\Delta E_{\text{sol}}$ |
|-------------------------|-------------------------|-------------------------|-------------------------|
| <b>B1</b>               | 0.0                     | 0.0                     | 0.0                     |
| <b>B1-H<sub>2</sub></b> | -0.7                    | 9.2                     | 9.7                     |
| <b>B2</b>               | -13.4                   | -2.6                    | -13.2                   |
| <b>B3</b>               | -26.3                   | 0.3                     | -20.0                   |
| <b>B4</b>               | -13.4                   | 16.7                    | -12.3                   |
| <b>B5</b>               | 6.7                     | 18.3                    | -4.0                    |
| <b>B6</b>               | 3.2                     | 24.2                    | -5.9                    |
| <b>B7</b>               | -11.6                   | 16.6                    | -29.1                   |
| <b>B8</b>               | 0.7                     | 22.8                    | -7.6                    |
| <b>B9</b>               | -1.9                    | 25.2                    | -21.9                   |
| <b>B10</b>              | -15.9                   | 4.1                     | -14.6                   |
| <b>B11</b>              | -8.2                    | 16.0                    | -18.3                   |
| <b>B12</b>              | 178.2                   | 188.3                   | 24.6                    |
| <b>B13</b>              | -24.9                   | 14.6                    | -28.6                   |
| <b>B14</b>              | -37.3                   | 2.1                     | -41.9                   |
| <b>B15</b>              | 15.6                    | 26.1                    | 10.6                    |
| <b>B16</b>              | -3.6                    | 25.2                    | -3.2                    |
| <b>B17</b>              | 2.7                     | 28.6                    | 2.9                     |
| <b>B18</b>              | 11.9                    | 33.8                    | 8.5                     |
| <b>B19</b>              | 13.2                    | 34.3                    | 8.7                     |
| <b>B20</b>              | 11.0                    | 34.0                    | 10.1                    |
| <b>B21</b>              | -14.0                   | 15.2                    | -16.3                   |
| <b>B22</b>              | -14.8                   | 11.8                    | -19.7                   |
| <b>B7'</b>              | 7.7                     | 22.4                    | -12.8                   |
| <b>B8'</b>              | 12.9                    | 29.1                    | -8.9                    |
| <b>TSB1-2</b>           | -0.6                    | 8.9                     | -0.1                    |
| <b>TSB2-15</b>          | 16.0                    | 24.0                    | 10.4                    |
| <b>TSB3-4</b>           | -8.5                    | 18.1                    | -2.9                    |
| <b>TSB6-7</b>           | 11.2                    | 33.9                    | -0.7                    |
| <b>TSB8-9</b>           | 4.0                     | 29.3                    | -5.7                    |
| <b>TSB9-7</b>           | 10.8                    | 35.1                    | -6.5                    |
| <b>TSB10-11</b>         | 22.2                    | 47.7                    | 10.7                    |
| <b>TSB13-14</b>         | -7.9                    | 34.3                    | -13.8                   |
| <b>TSB16-21</b>         | 6.0                     | 33.2                    | 10.2                    |
| <b>TSB20-22</b>         | 21.3                    | 45.6                    | 15.5                    |
| <b>TSB7-8'</b>          | 22.5                    | 41.1                    | 6.3                     |

Table S4. The  $\Delta E_{\text{gas}}$ ,  $\Delta G_{\text{gas}}$ , and,  $\Delta E_{\text{sol}}$  of the species involved in the **C1** catalyzed  $\text{CO}_2$  hydrogenation.

| Species                 | $\Delta E_{\text{gas}}$ | $\Delta G_{\text{gas}}$ | $\Delta E_{\text{sol}}$ |
|-------------------------|-------------------------|-------------------------|-------------------------|
| <b>C1</b>               | 0.0                     | 0.0                     | 0.0                     |
| <b>C1-H<sub>2</sub></b> | -1.7                    | 9.2                     | 10.1                    |
| <b>C2</b>               | -11.3                   | -0.3                    | -10.9                   |
| <b>C3</b>               | -27.6                   | -1.7                    | -20.6                   |
| <b>C4</b>               | -26.2                   | 2.9                     | -27.1                   |
| <b>C5</b>               | -7.6                    | 4.3                     | -15.0                   |
| <b>C6</b>               | -10.6                   | 9.2                     | -16.9                   |
| <b>C7</b>               | -20.7                   | 6.3                     | -33.1                   |
| <b>C8</b>               | -12.7                   | 8.9                     | -18.1                   |
| <b>C9</b>               | -13.1                   | 14.8                    | -27.9                   |
| <b>C10</b>              | -18.6                   | 2.0                     | -16.7                   |
| <b>C11</b>              | -8.5                    | 16.4                    | -16.5                   |
| <b>C12</b>              | 185.8                   | 195.1                   | 31.7                    |
| <b>C13</b>              | -23.9                   | 14.9                    | -25.8                   |
| <b>C14</b>              | -44.7                   | -2.9                    | -45.9                   |
| <b>C7'</b>              | -0.3                    | 10.0                    | -24.5                   |
| <b>C8'</b>              | 1.6                     | 13.7                    | -23.3                   |
| <b>TSC1-2</b>           | -1.2                    | 9.2                     | -0.4                    |
| <b>TSC3-4</b>           | -14.7                   | 11.8                    | -8.4                    |
| <b>TSC6-7</b>           | -1.9                    | 20.5                    | -10.1                   |
| <b>TSC8-9</b>           | -8.1                    | 18.1                    | -14.4                   |
| <b>TSC9-7</b>           | 2.4                     | 28.3                    | -8.7                    |
| <b>TSC10-11</b>         | 18.5                    | 45.5                    | 12.4                    |
| <b>TSC13-14</b>         | -10.4                   | 31.5                    | -14.2                   |
| <b>TSC7-8'</b>          | 14.9                    | 26.5                    | -7.4                    |

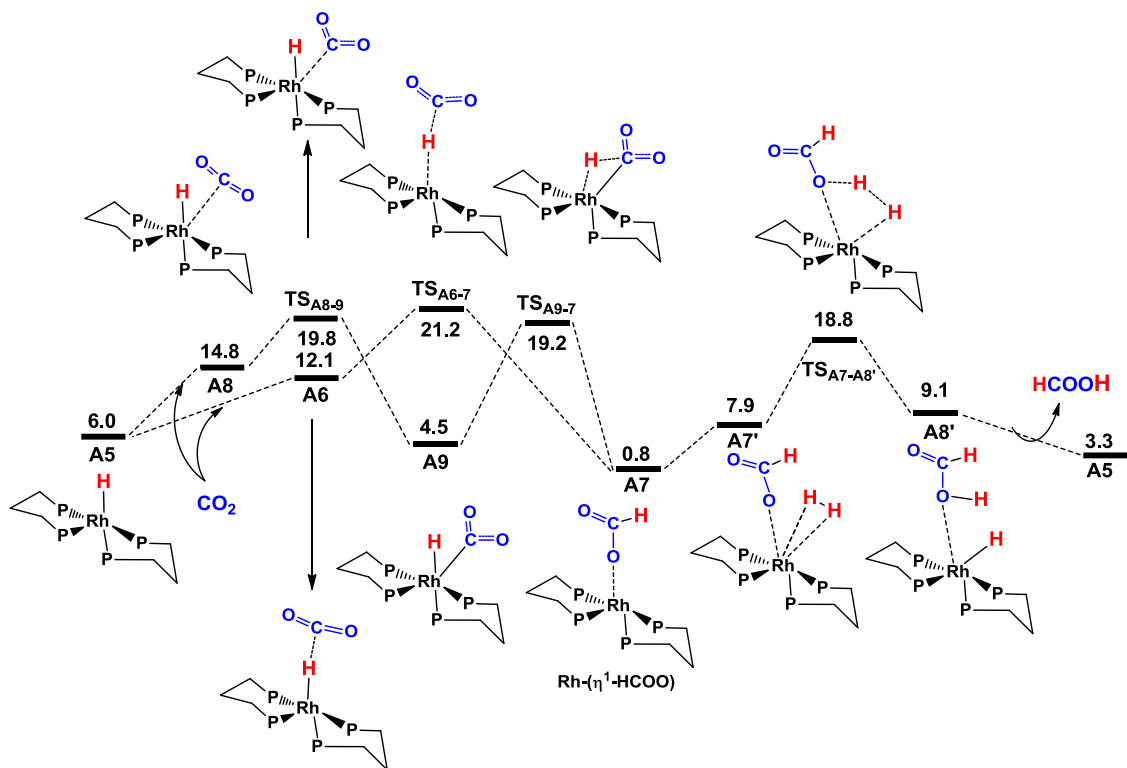

Figure S1. Solvent corrected free energy profile of the  $\sigma$ -bond metathesis route for  $\text{A5}$  catalyzed  $\text{CO}_2$  hydrogenation.

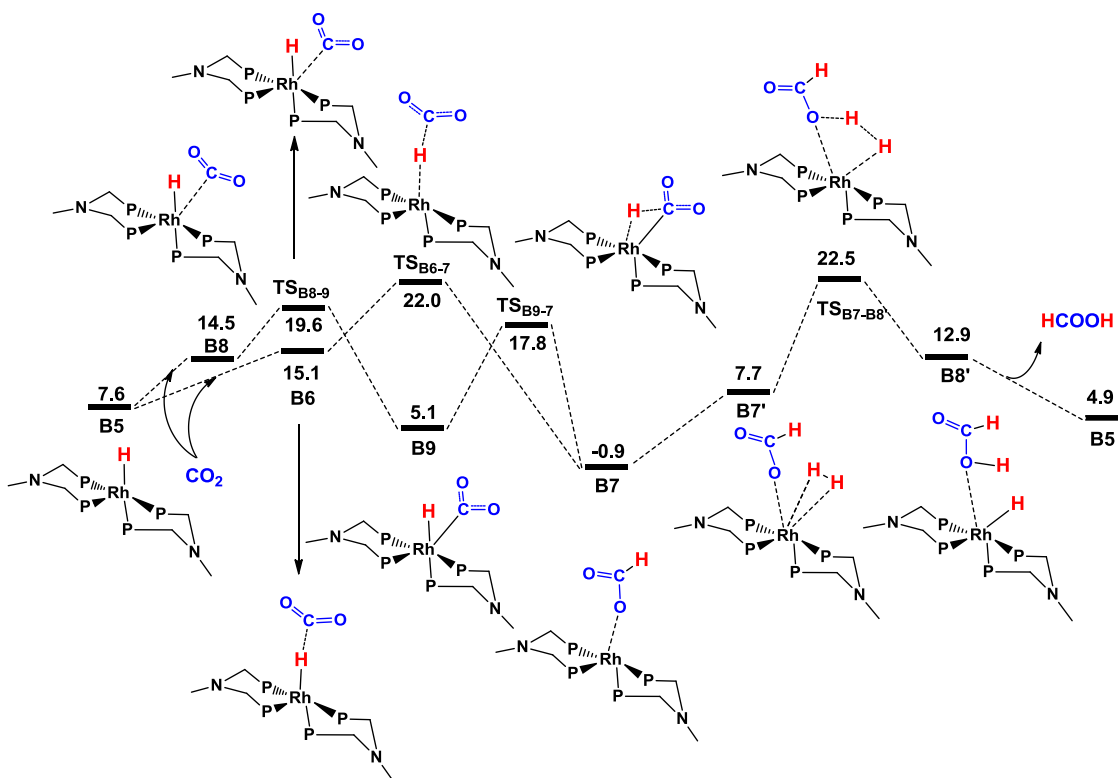

Figure S2. Solvent corrected free energy profile of the  $\sigma$ -bond metathesis route for **B5** catalyzed  $\text{CO}_2$  hydrogenation.

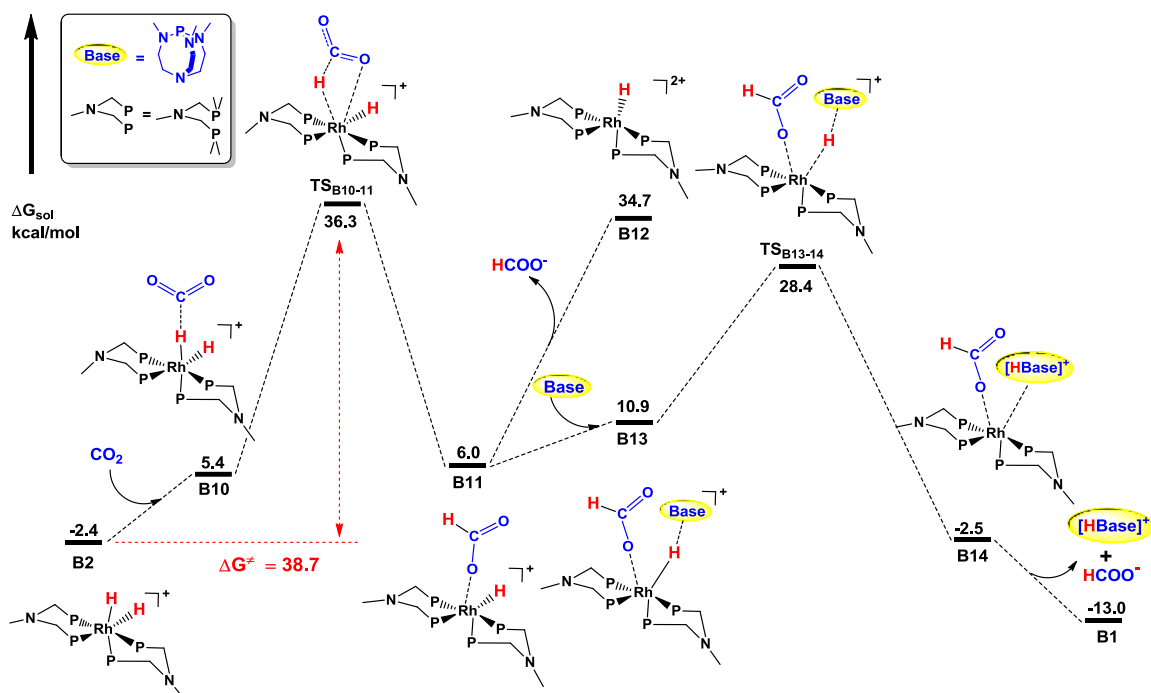

Figure S3. Solvent corrected free energy profile for  $[\text{Rh}(\text{PCH}_2\text{N}^{\text{Me}}\text{CH}_2\text{P})_2]^+$  (**B1**) catalyzed  $\text{CO}_2$  hydrogenation by the electrophilic attack of  $\text{CO}_2$  to the hydride of the Rh dihydride complex.



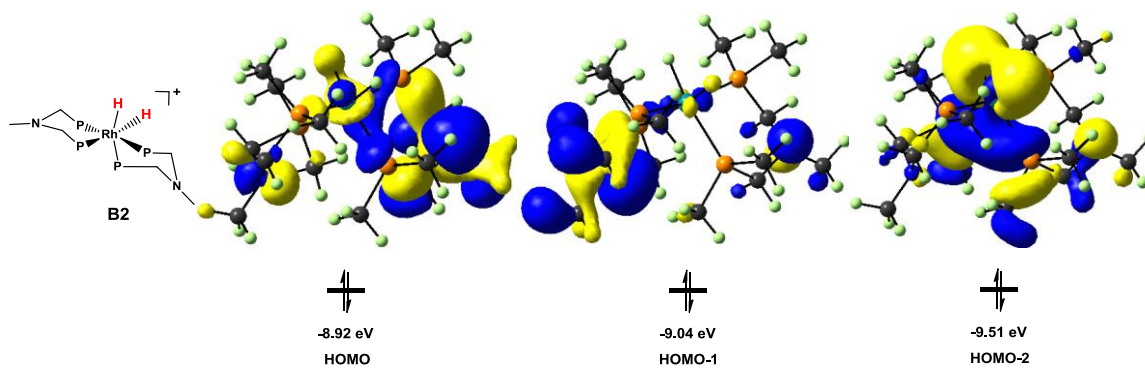

Figure S4. Skeleton diagrams and energies (in eV) of frontier molecular orbitals HOMO, HOMO-1, and HOMO-2 for **B2**.

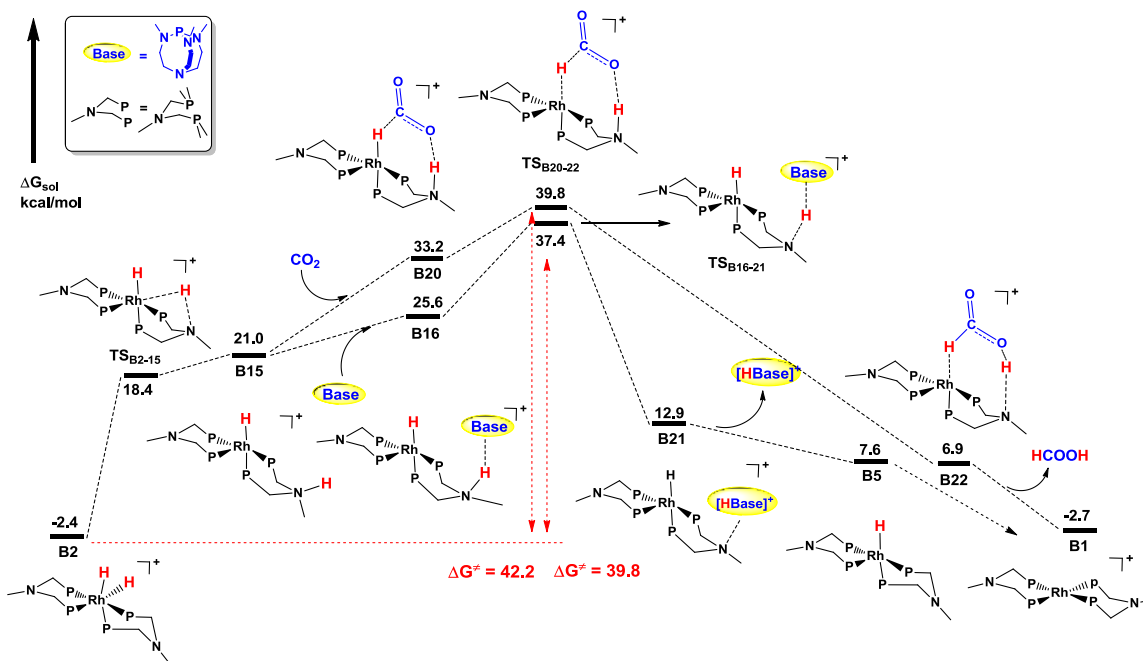

Figure S5. Selected Solvent corrected free energy profiles for outer sphere mechanism of CO<sub>2</sub> hydrogenation catalyzed by [Rh(PCH<sub>2</sub>N<sup>Me</sup>CH<sub>2</sub>P)<sub>2</sub>]<sup>+</sup> (**B1**).

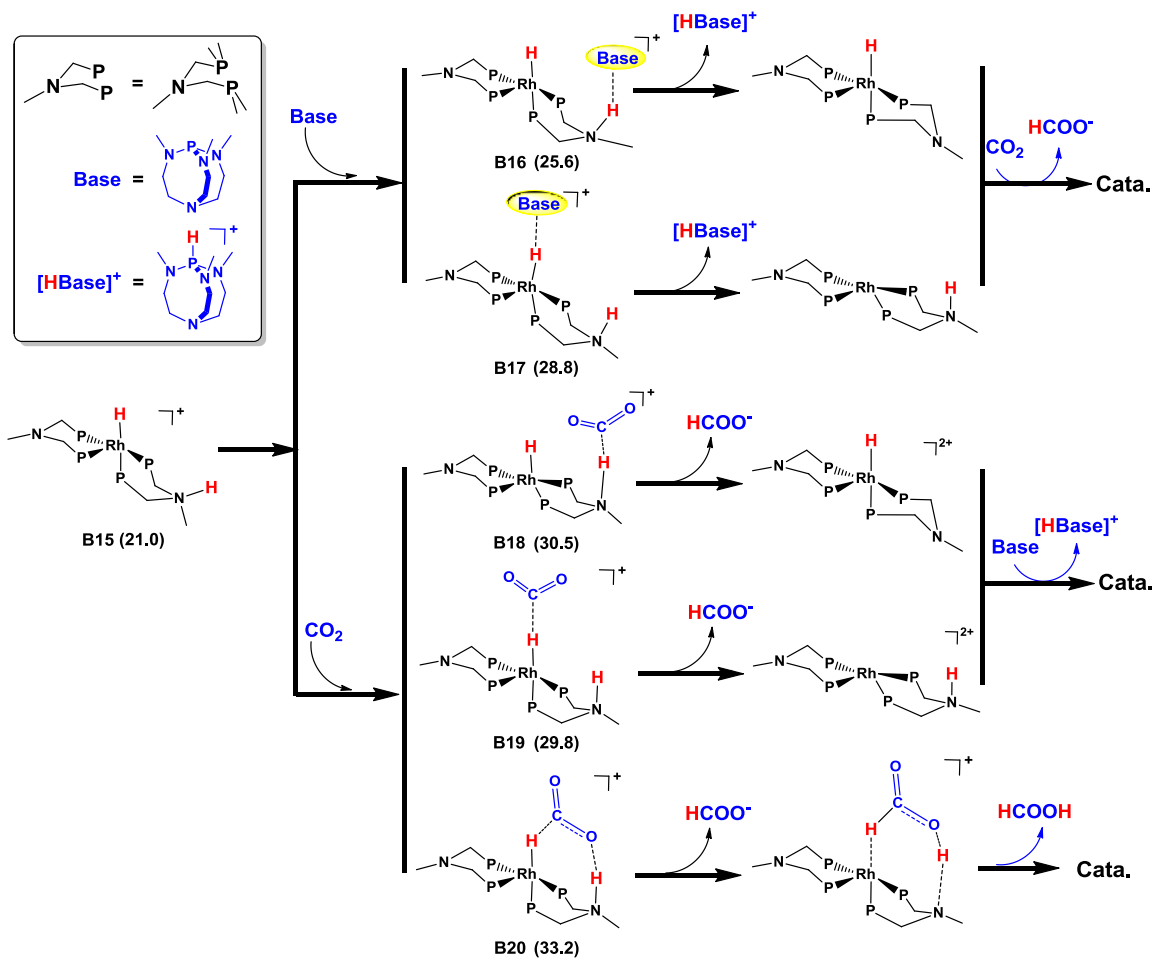

Figure S6. Outline of Proposed Outer Sphere Reaction Mechanism for CO<sub>2</sub> Hydrogenation Catalyzed by [Rh(PCH<sub>2</sub>N<sup>Me</sup>CH<sub>2</sub>P)<sub>2</sub>]<sup>+</sup> (B1).

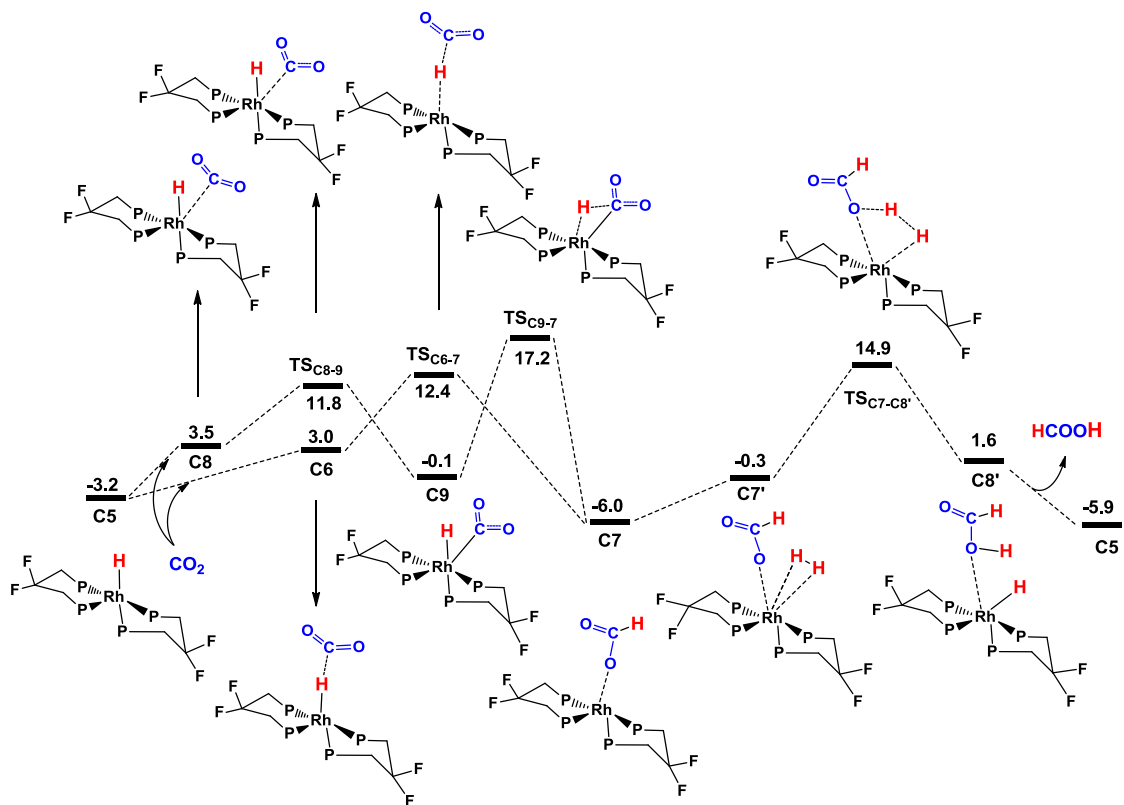

Figure S7. Solvent corrected free energy profile of the  $\sigma$ -bond metathesis route for **C5** catalyzed  $\text{CO}_2$  hydrogenation.

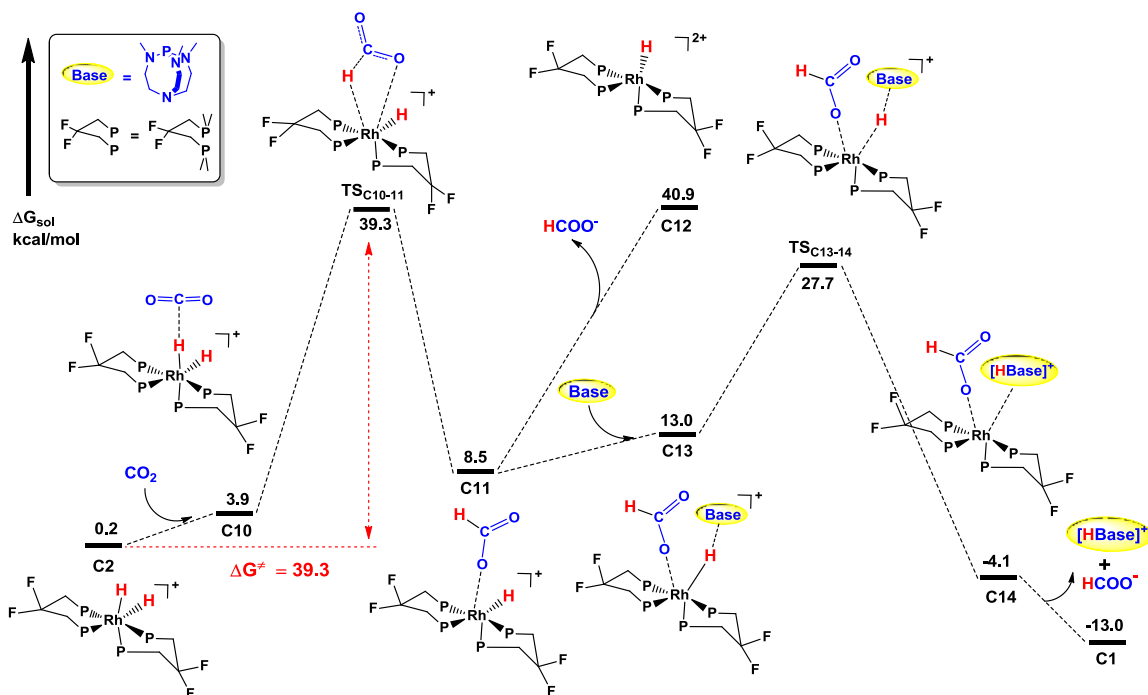

Figure S8. Solvent corrected free energy profile for  $[\text{Rh}(\text{PCH}_2\text{CF}_2\text{CH}_2\text{P})_2]^+$  (C1) catalyzed CO<sub>2</sub> hydrogenation by the electrophilic attack of CO<sub>2</sub> to the hydride of the Rh dihydride complex.

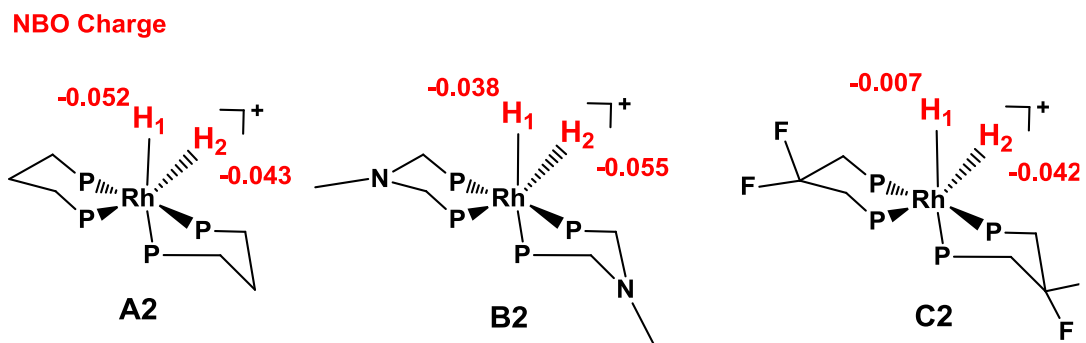

Figure S9. NBO charge distribution on metal H atoms and the selected bond length in **A2**, **B2** and **C2**.

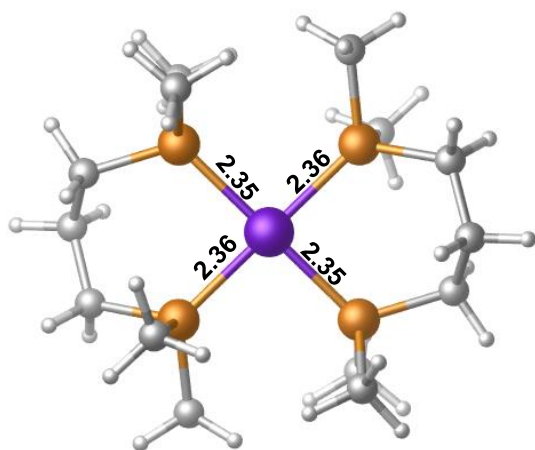

A1

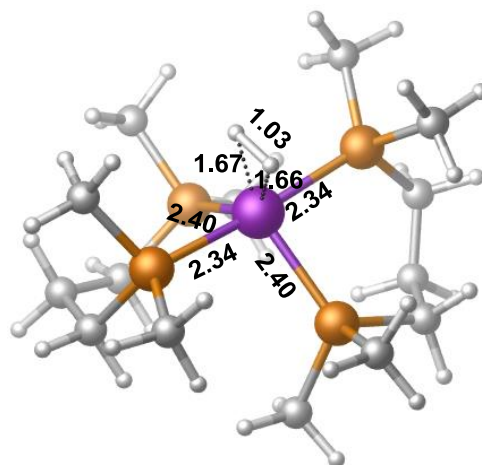

TSA1-2

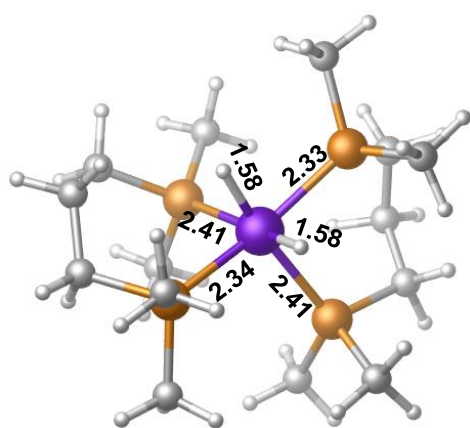

A2

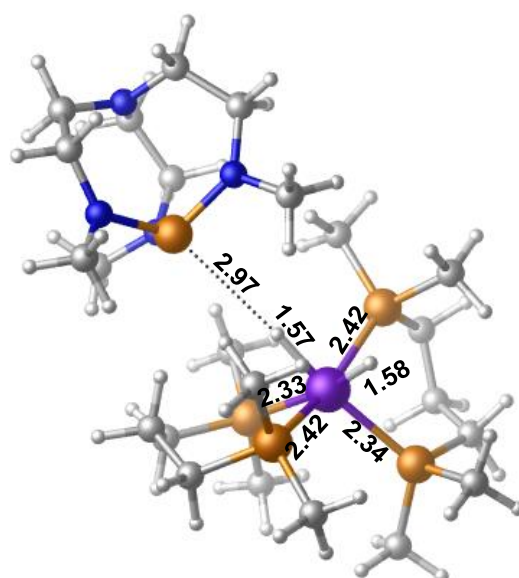

A3

Figure S10 continued

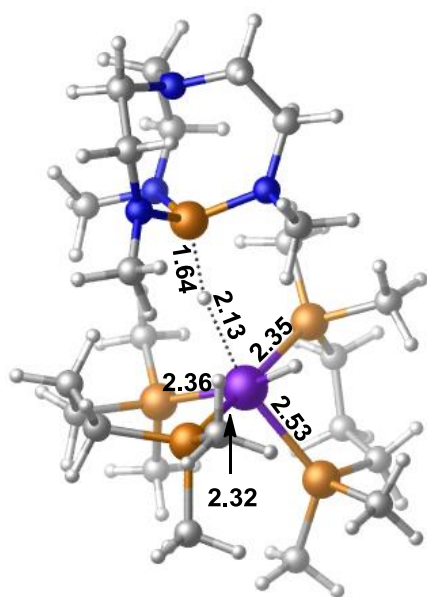

TSA3-4

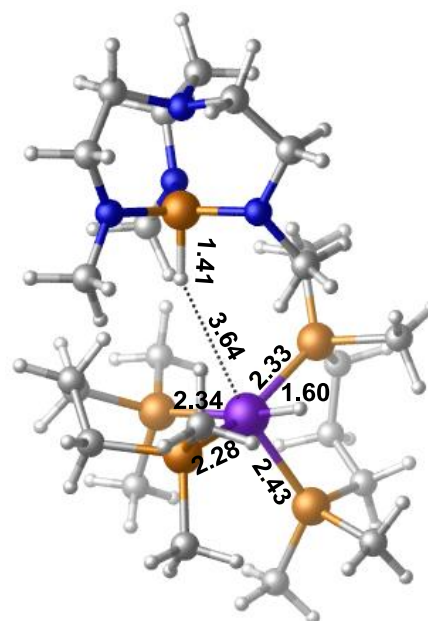

A4

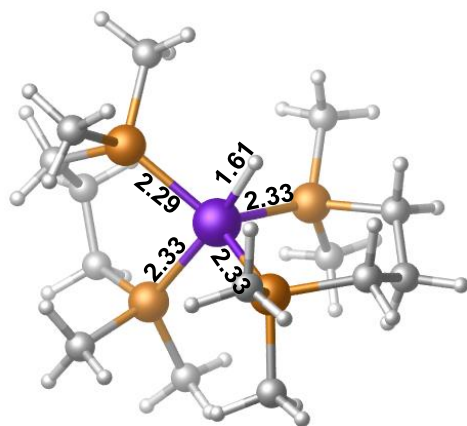

A5

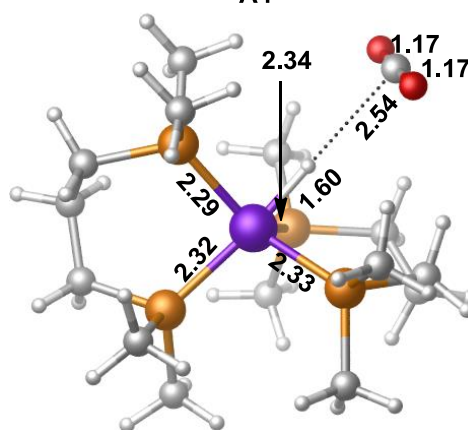

A6

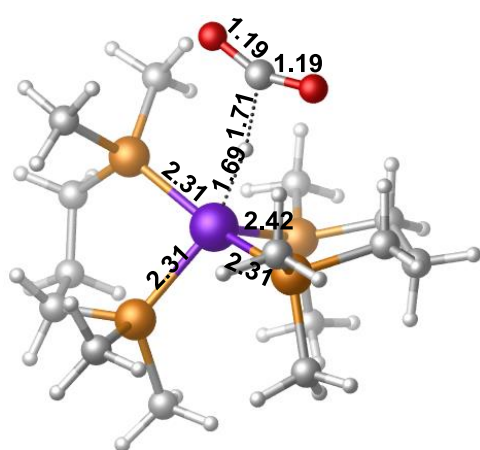

TSA6-7

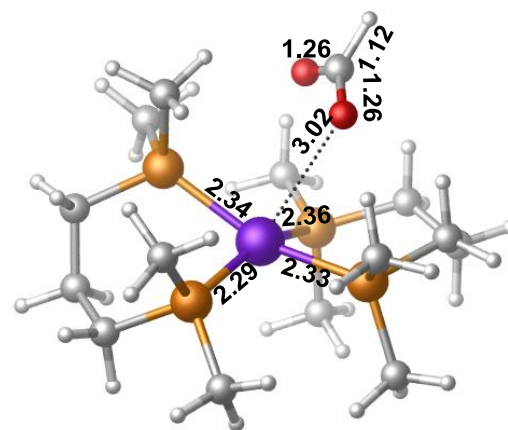

A7



Figure S10 continued

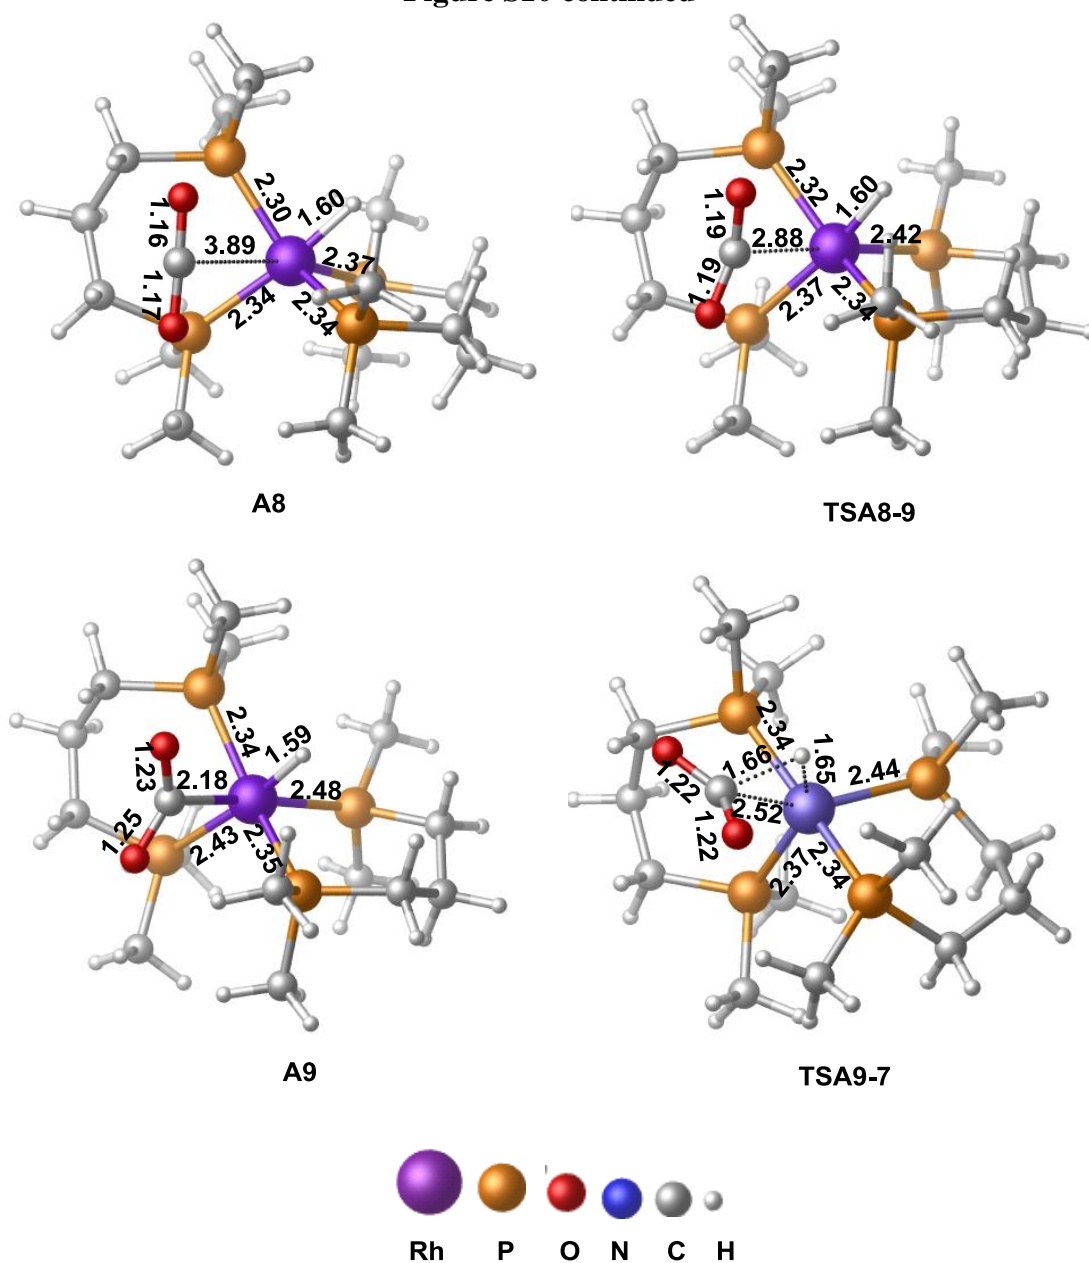

Figure S10. Optimized geometries with selected structural parameters (distances in Å) for the species involved in Figure 1 in the text.

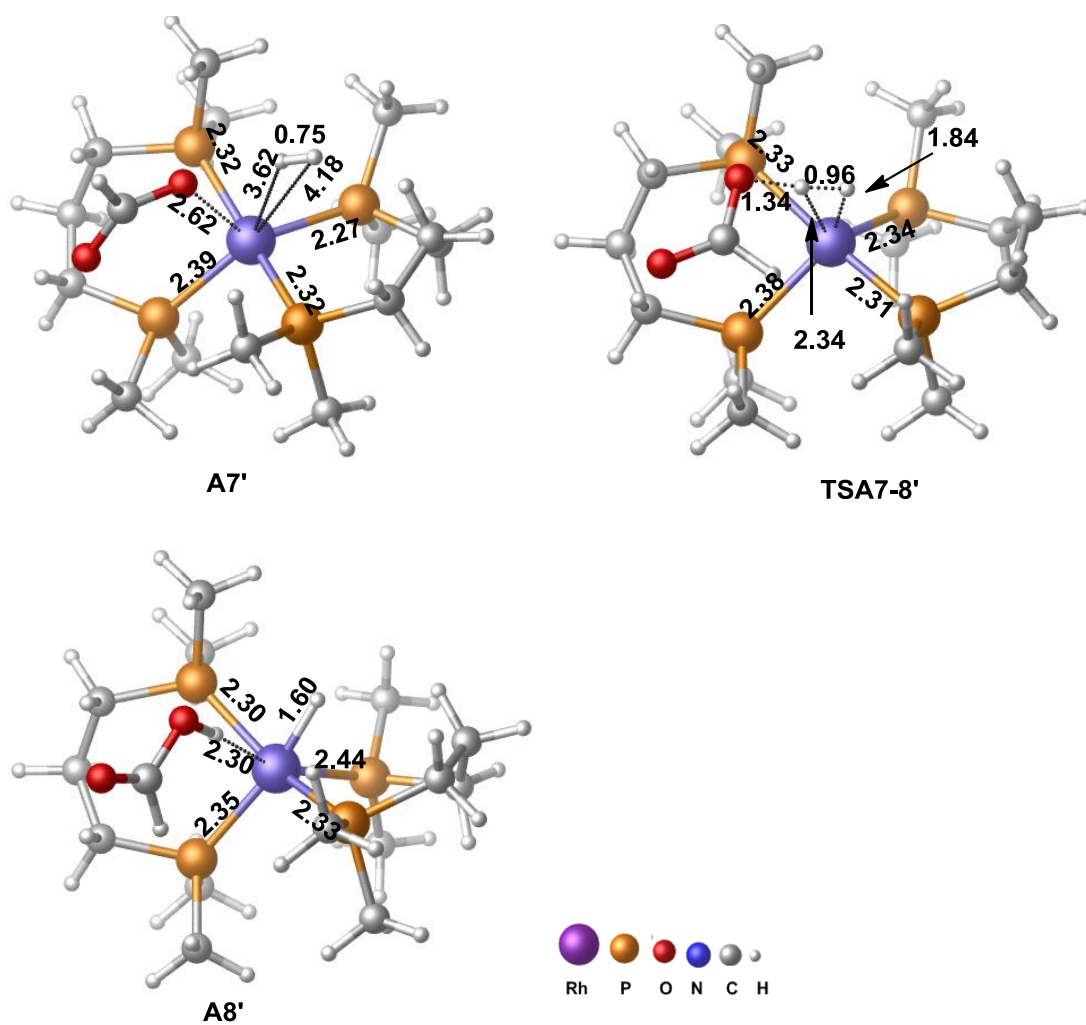

Figure S11. Optimized geometries with selected structural parameters (distances in Å) for the species involved in Figure S1 in the text.

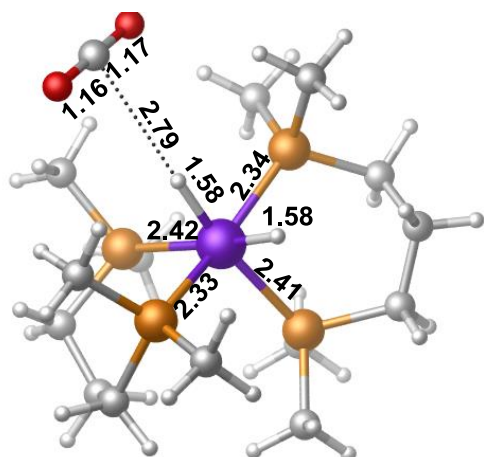

A10

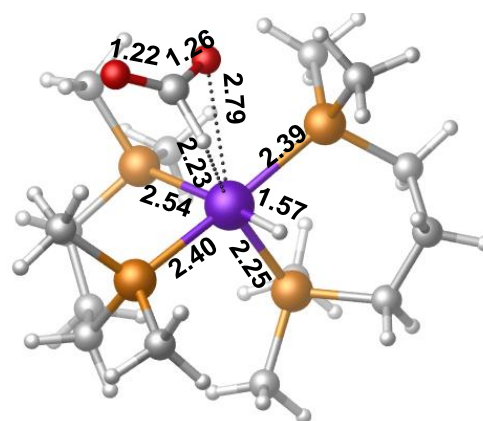

TSA10-11

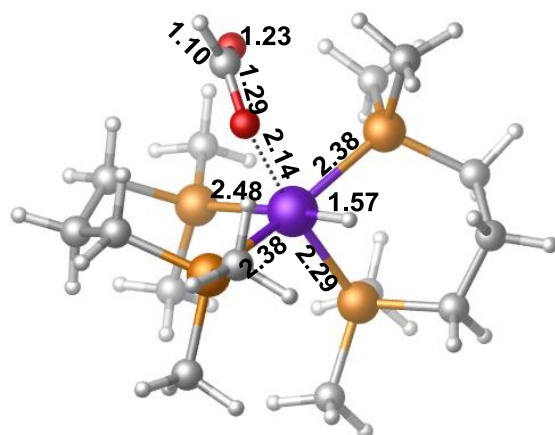

A11

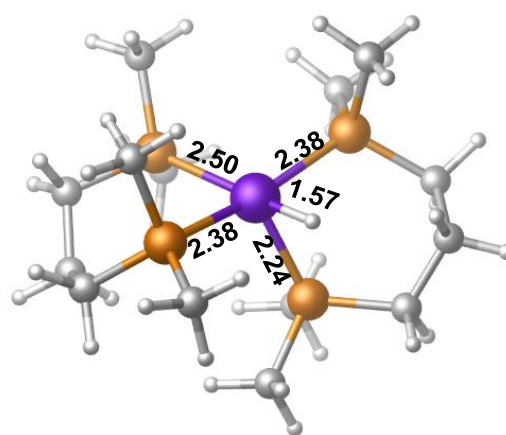

A12

Figure S12 continued

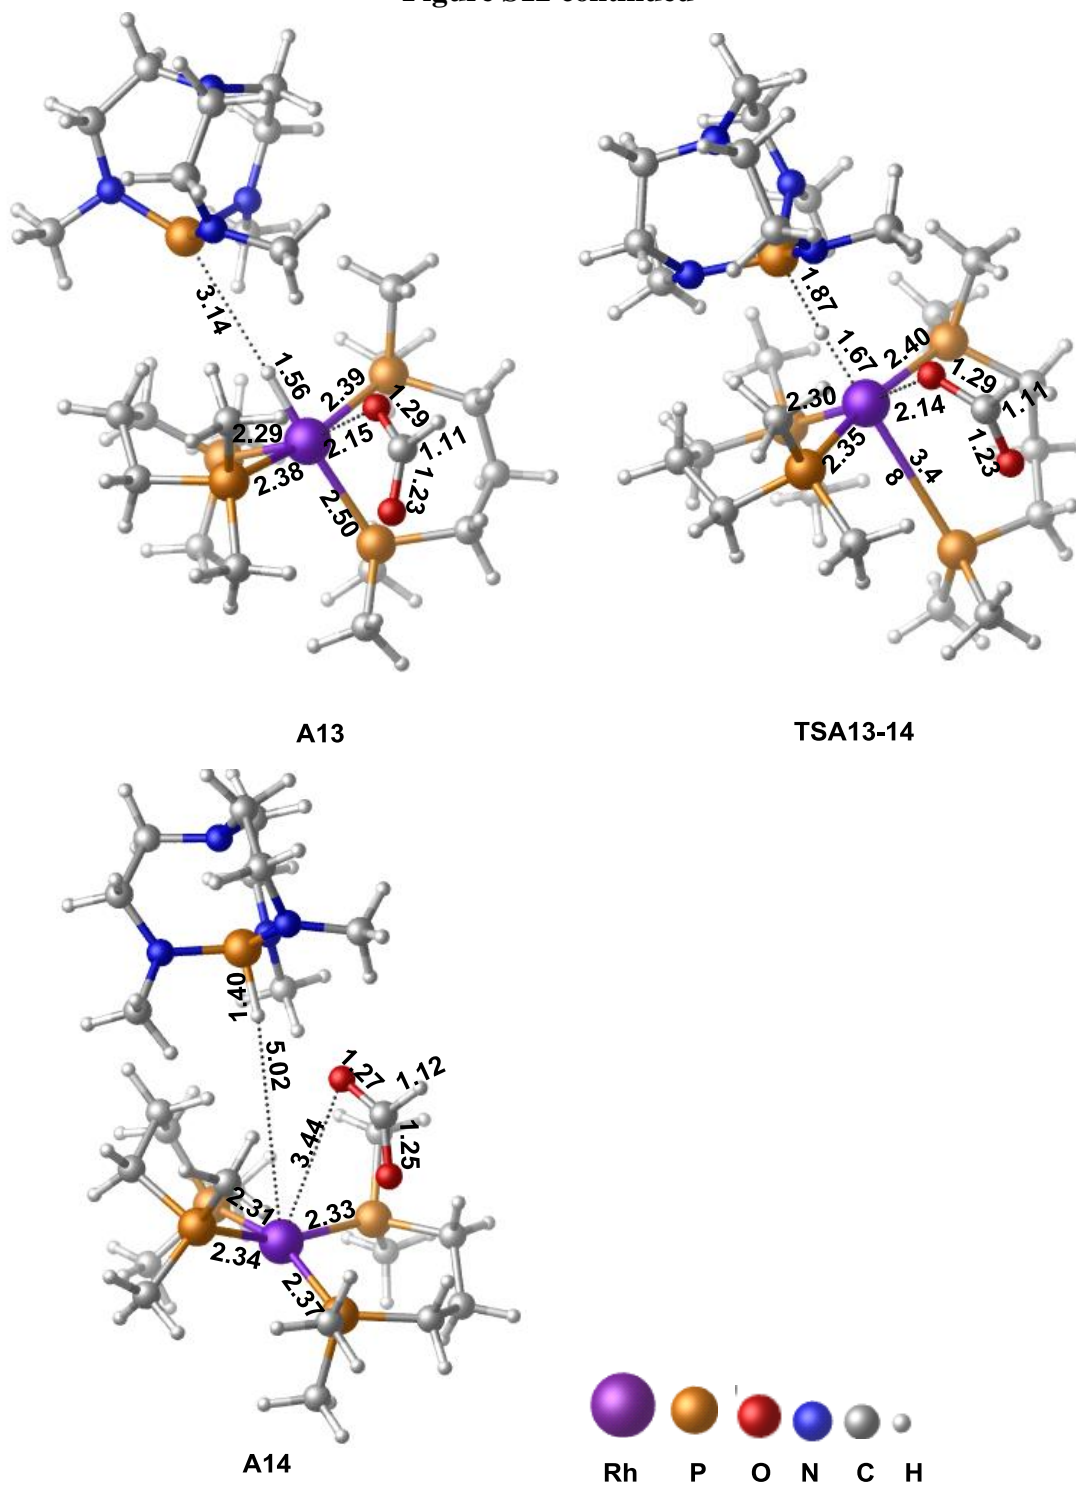

Figure S12. Optimized geometries with selected structural parameters (distances in Å) for the species involved in Figure 2 in the text.

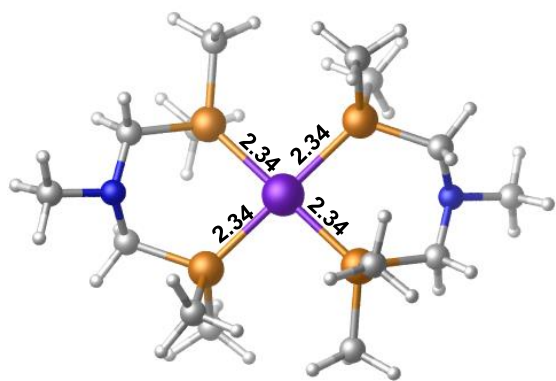

B1

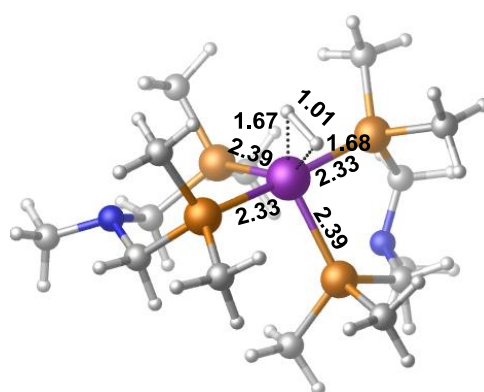

TSB1-2

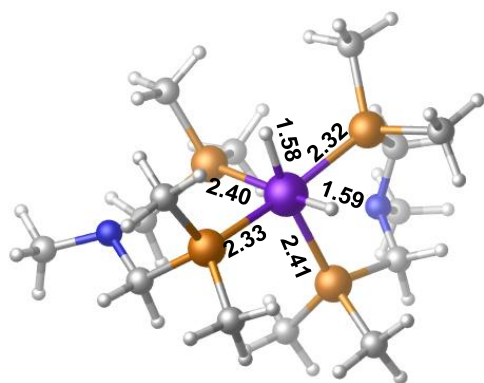

B2

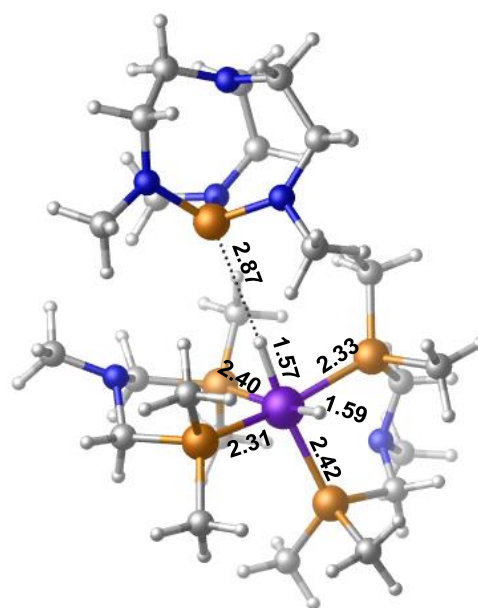

B3

Figure S13 continued

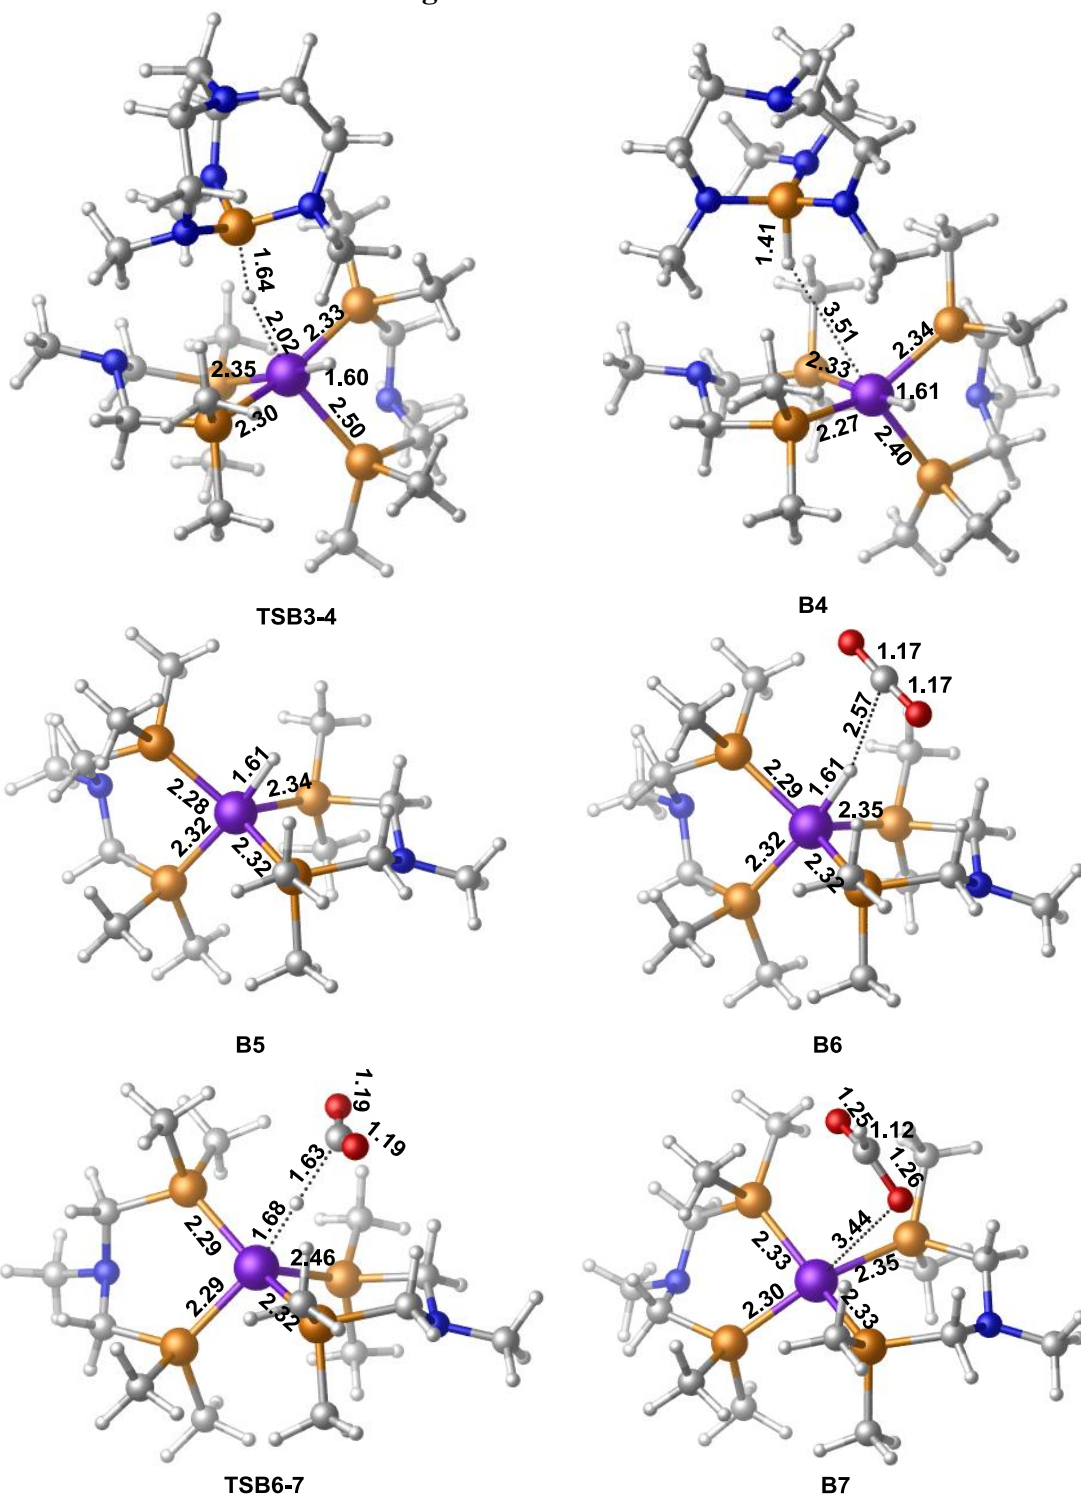

Figure S13 continued

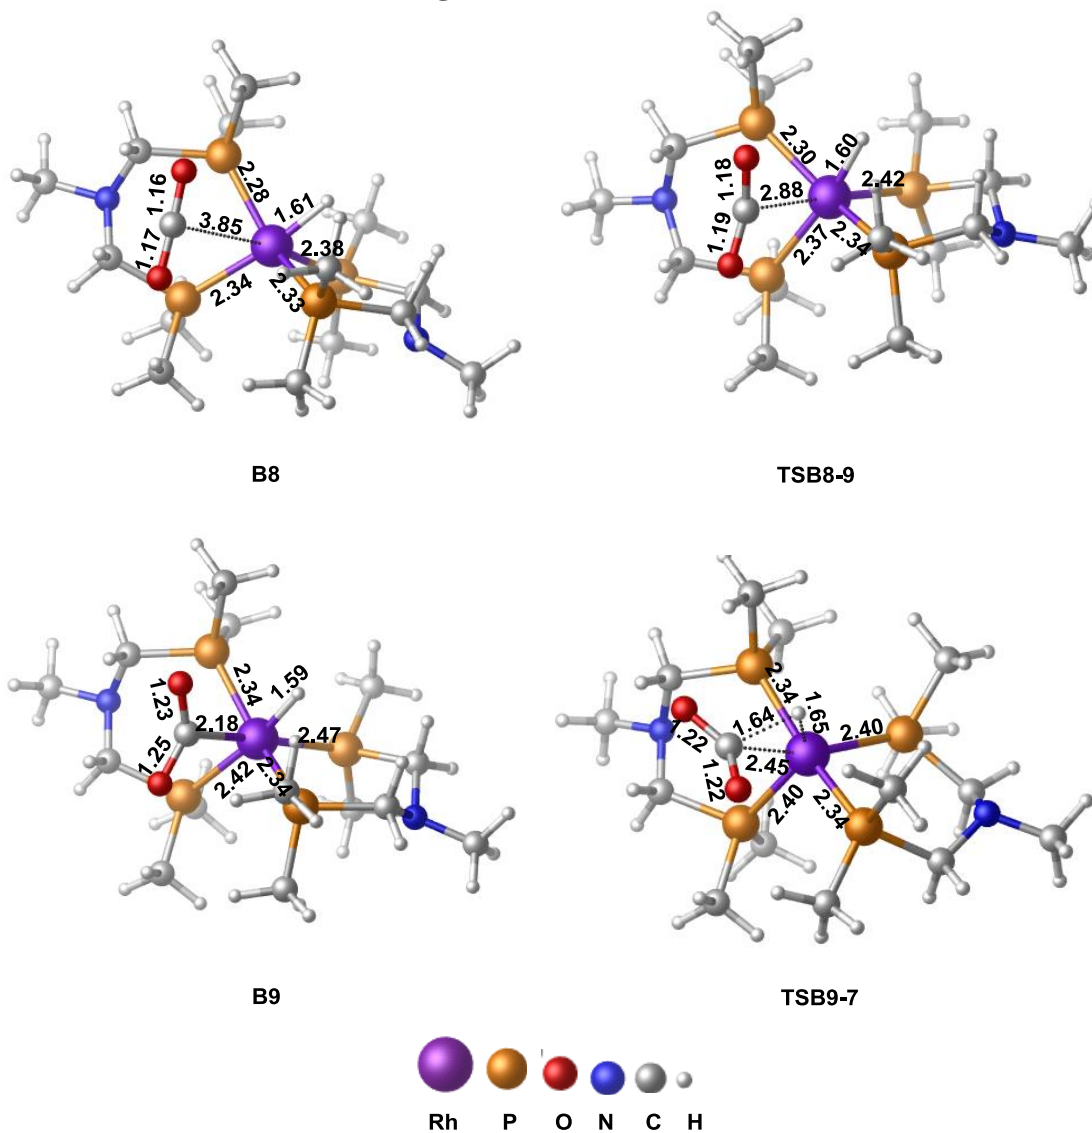

Figure S13. Optimized geometries with selected structural parameters (distances in Å) for the species involved in Figure 3 in the text.

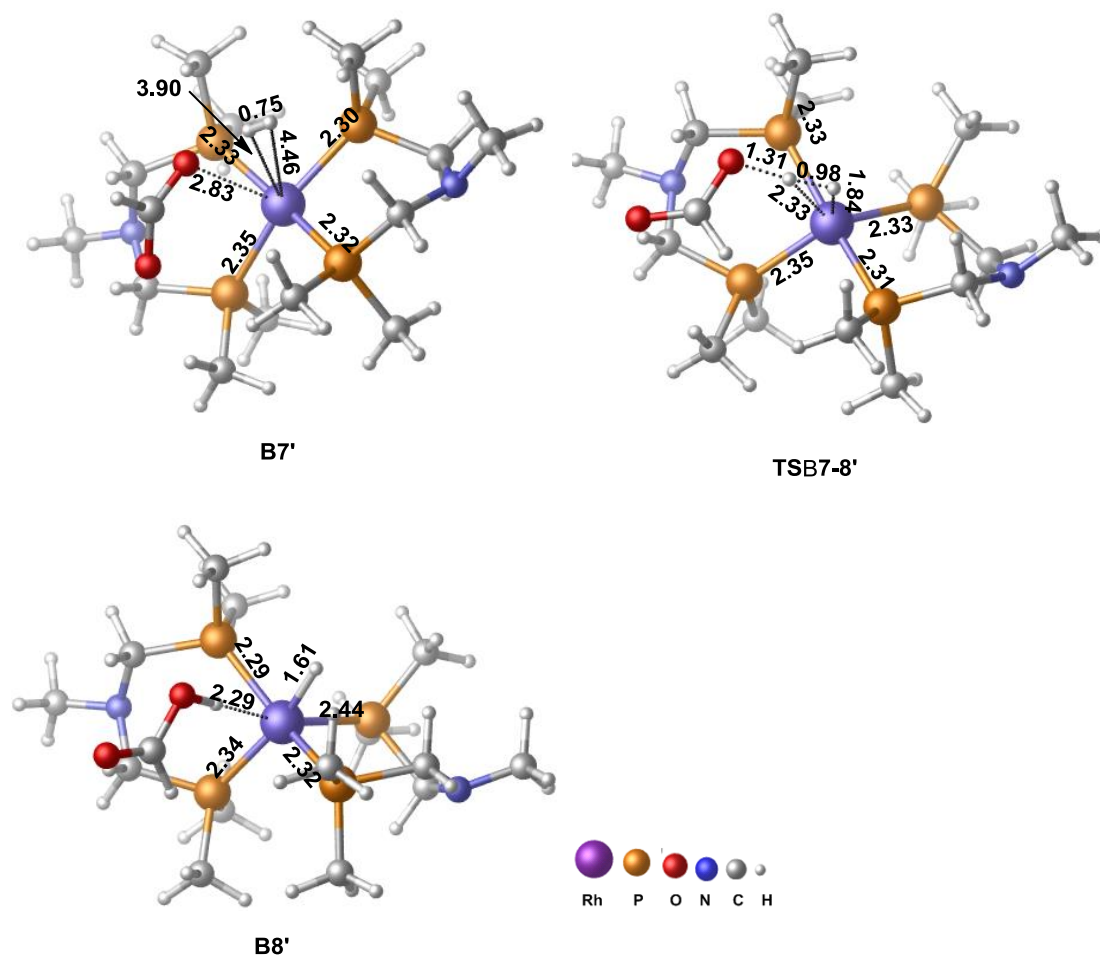

Figure S14. Optimized geometries with selected structural parameters (distances in Å) for the species involved in Figure S2 in the text.



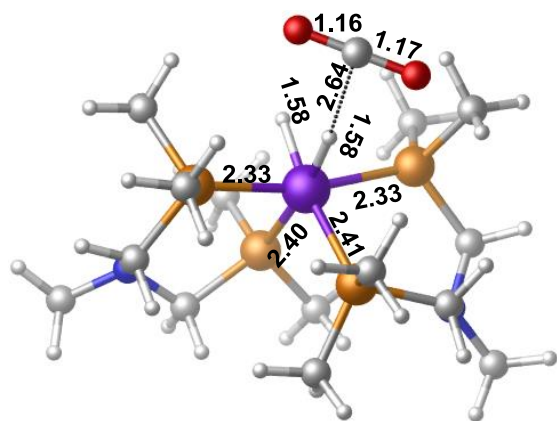

B10

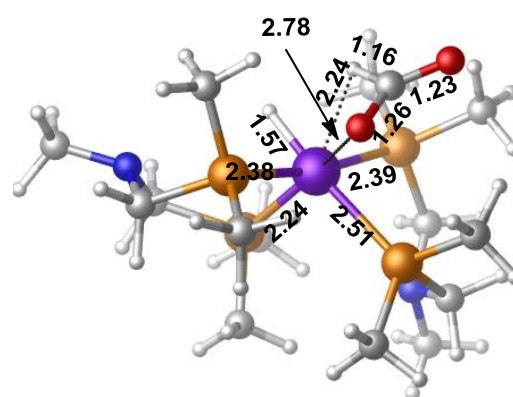

TSB10-11

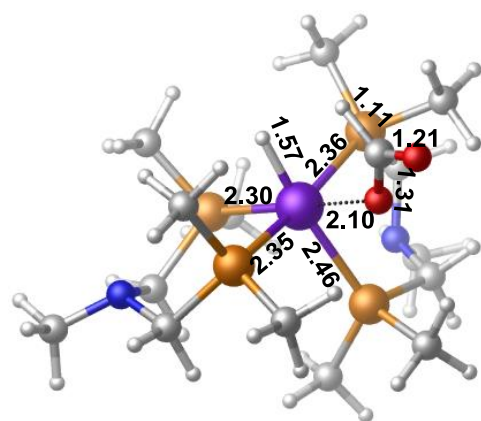

B11

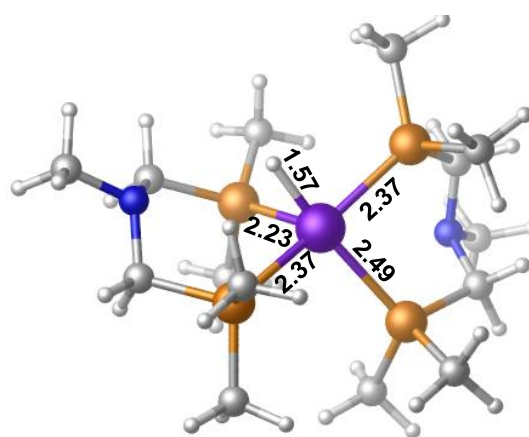

B12

Figure S15 continued

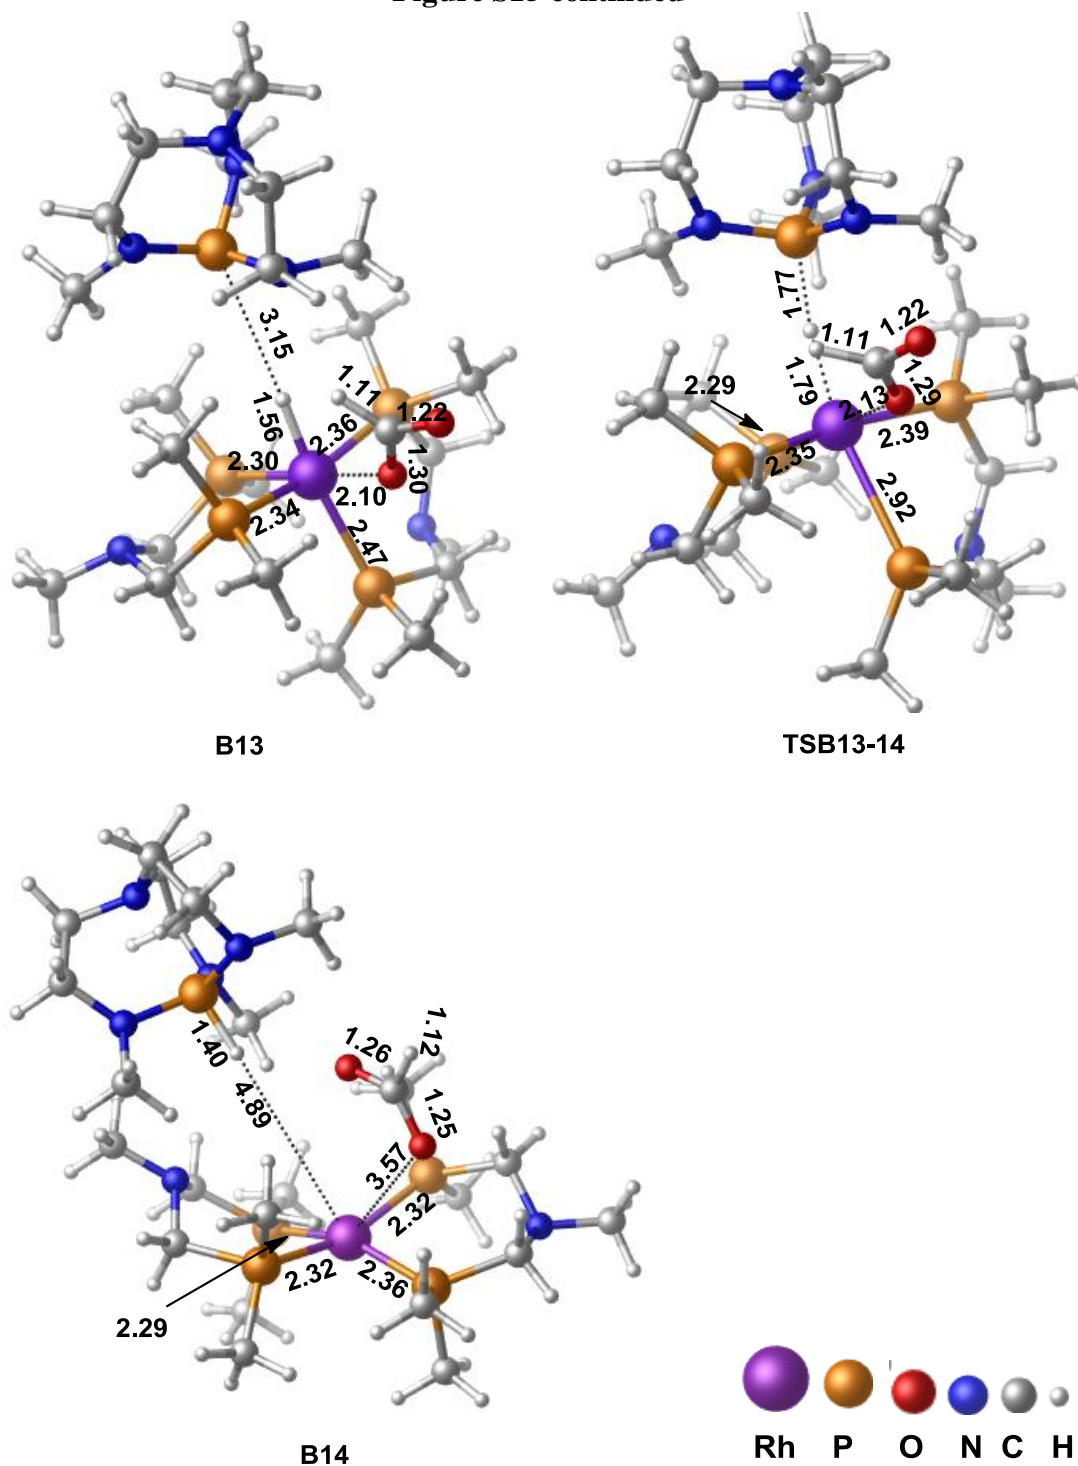

Figure S15. Optimized geometries with selected structural parameters (distances in Å) for the species involved in Figure S3 in the text.

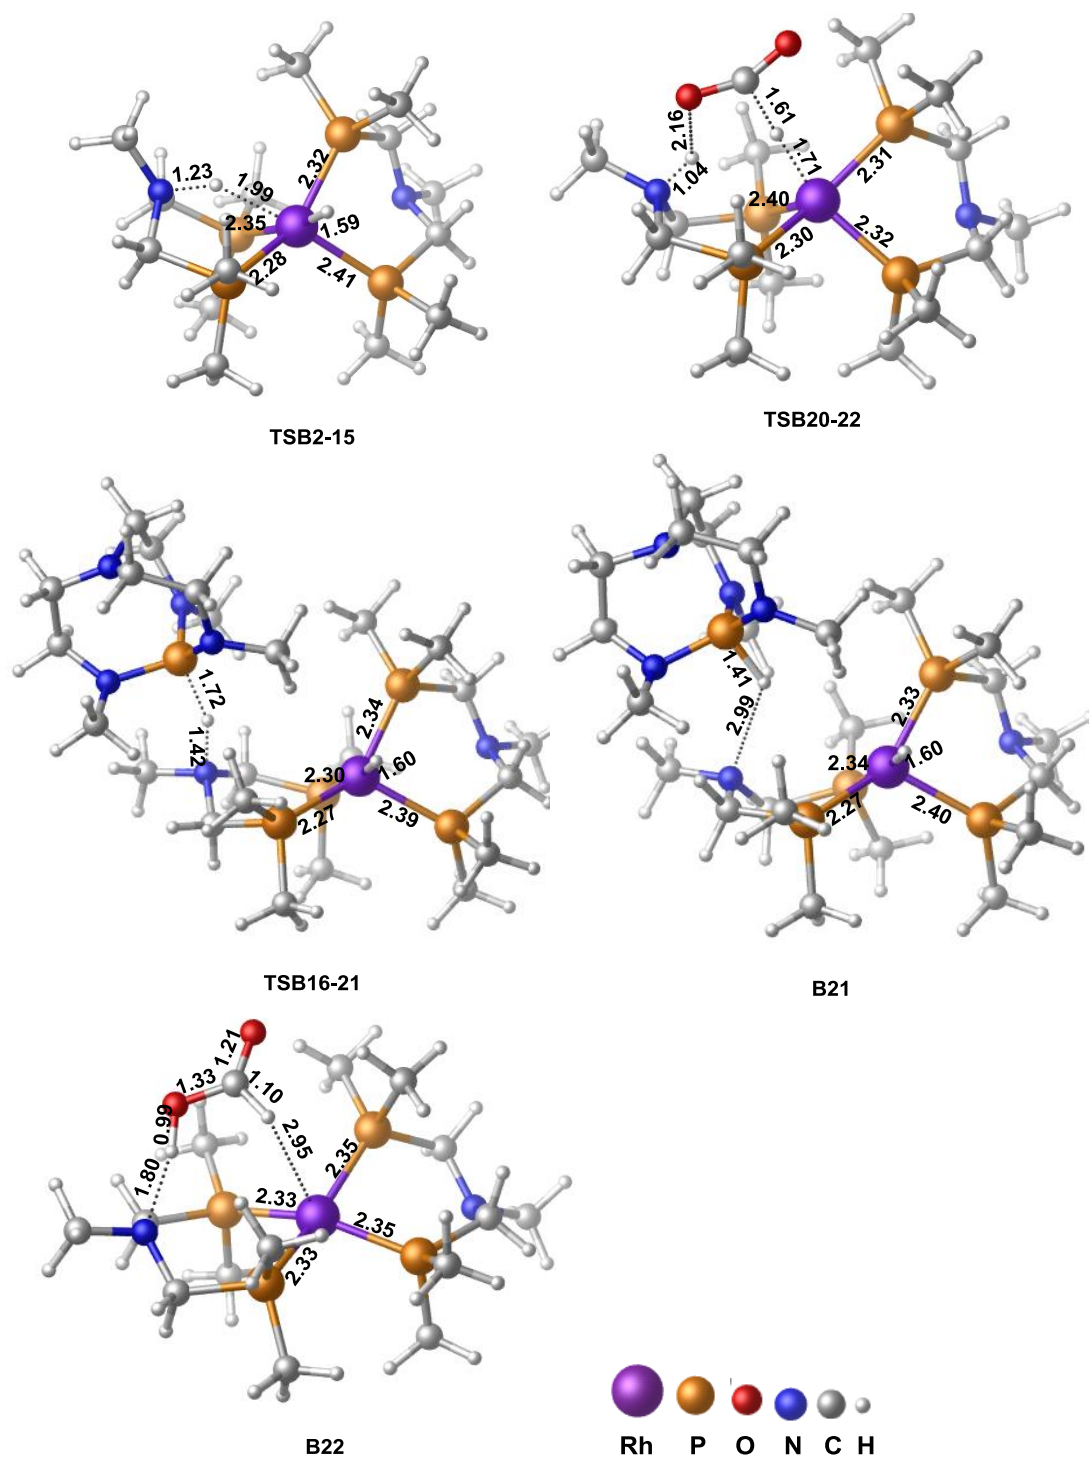

Figure S16. Optimized geometries with selected structural parameters (distances in Å) for the species involved in Figure S5 in the text.

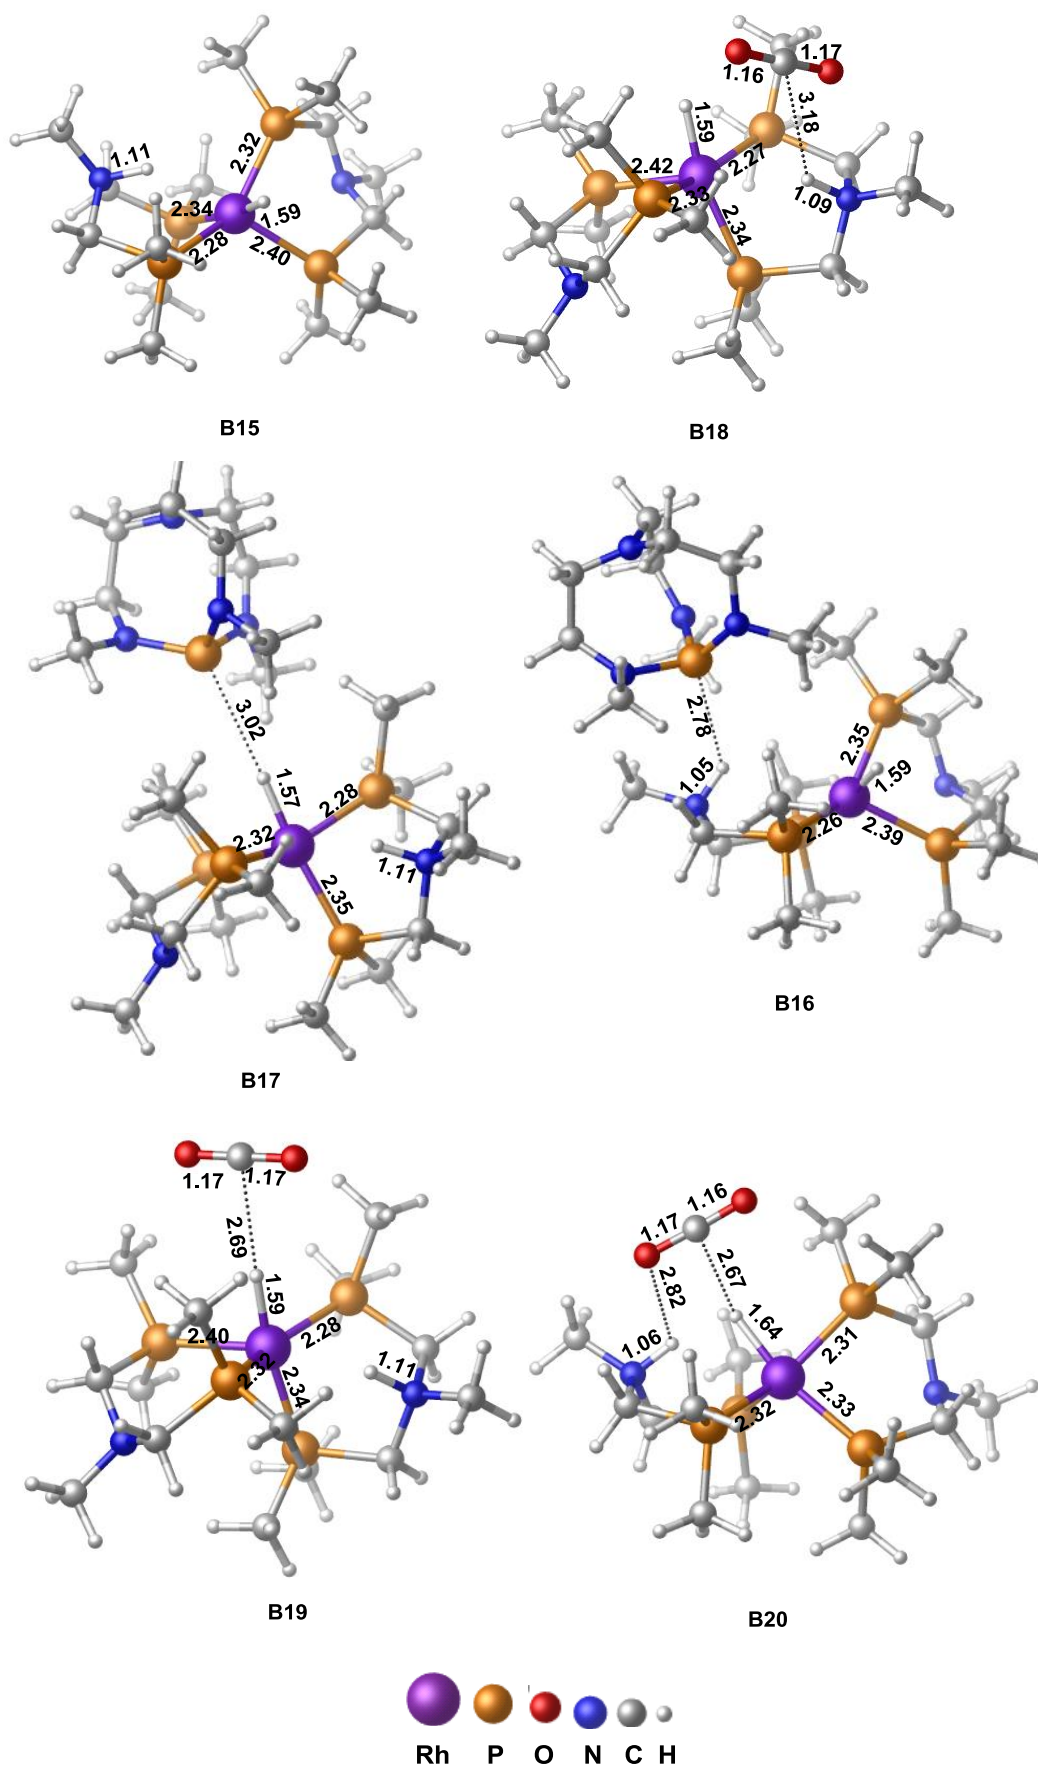

Figure S17. Optimized geometries with selected structural parameters (distances in Å) for the species involved in Figure S6 in the text.

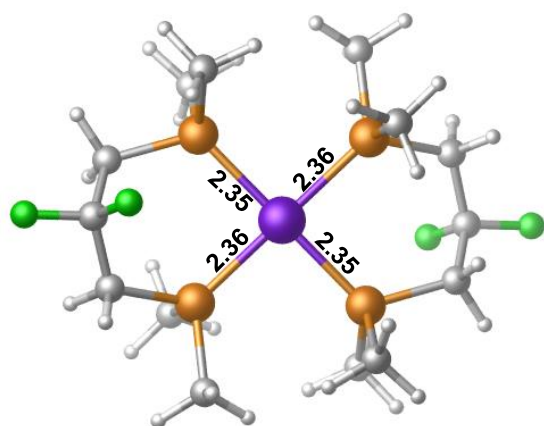

C1

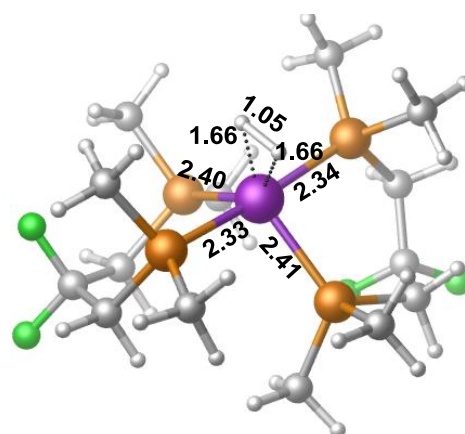

TSC1-2

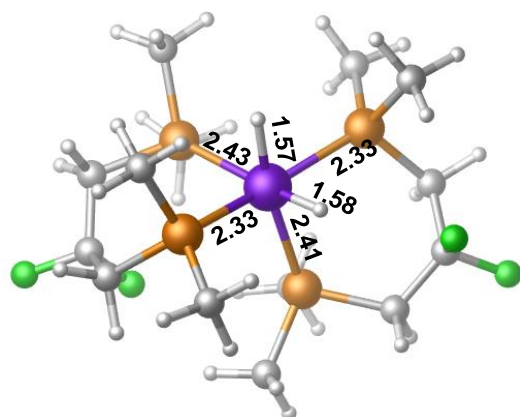

C2

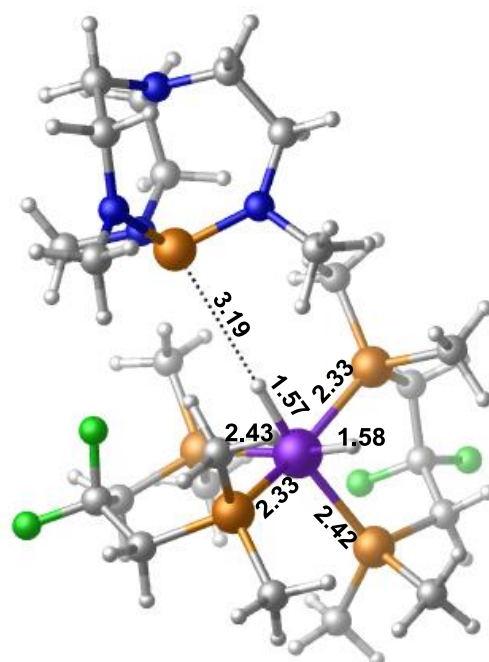

C3

Figure S18 continued

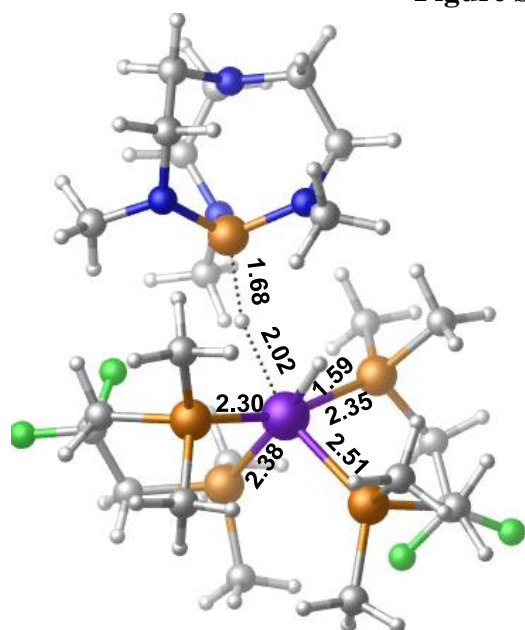

TSC3-4

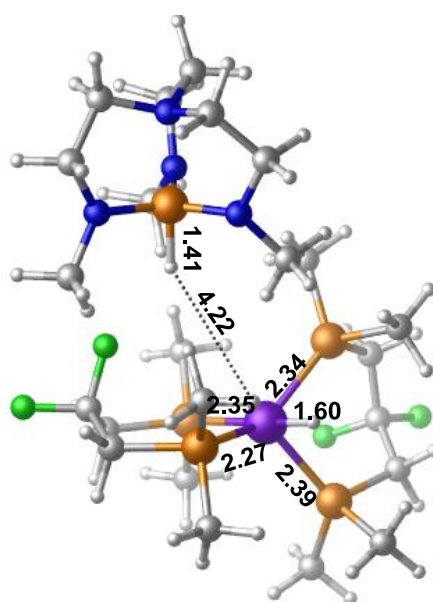

C4

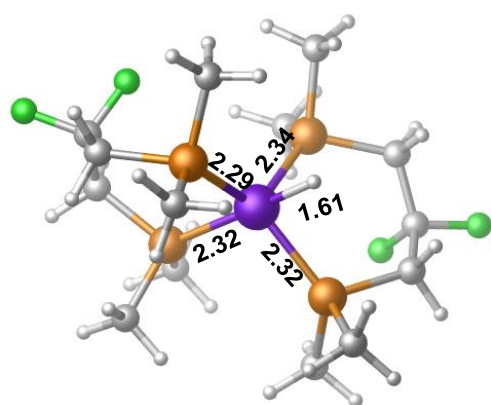

C5

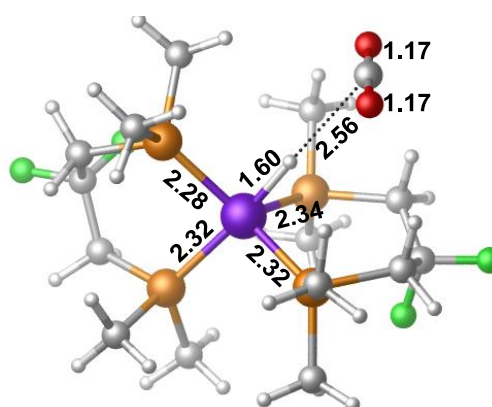

C6

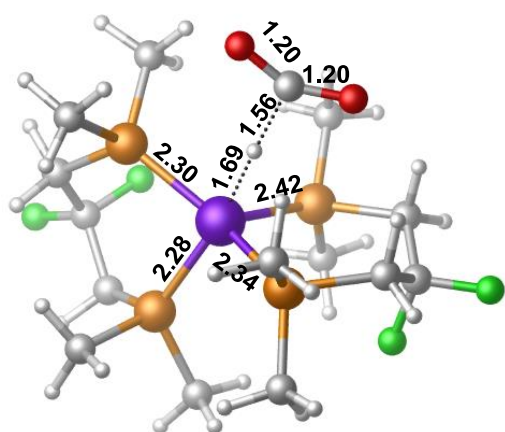

TSC6-7

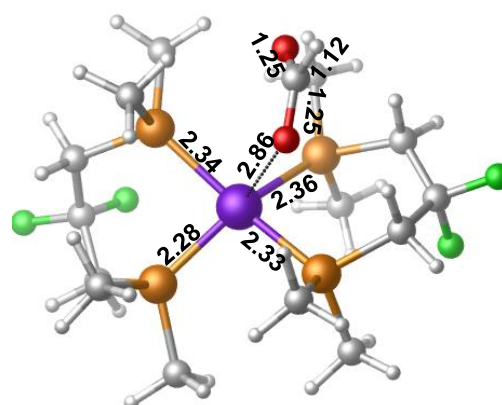

C7

Figure S18 continued

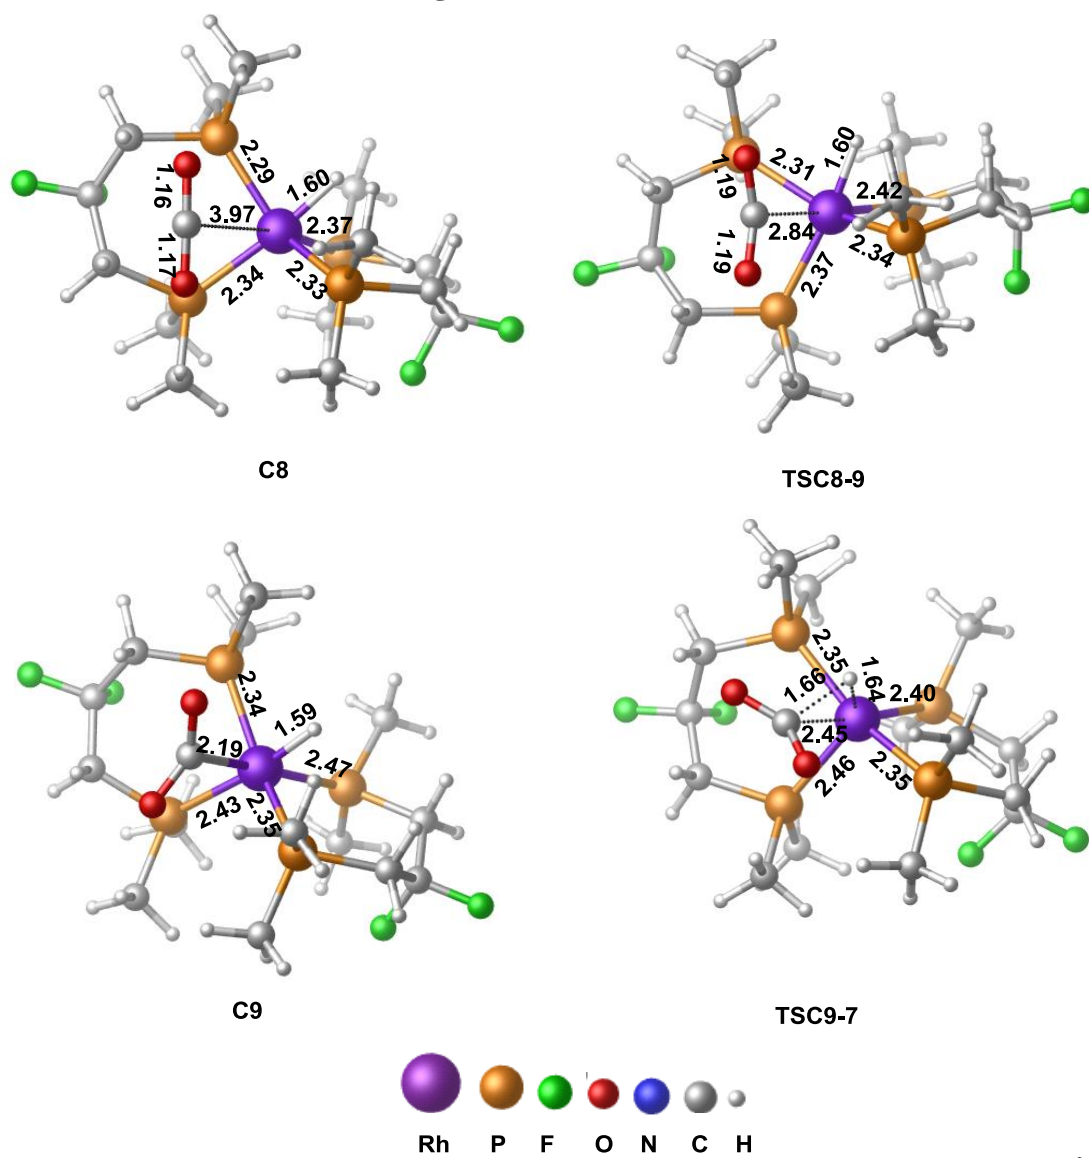

Figure S18. Optimized geometries with selected structural parameters (distances in Å) for the species involved in Figure 4 in the text.

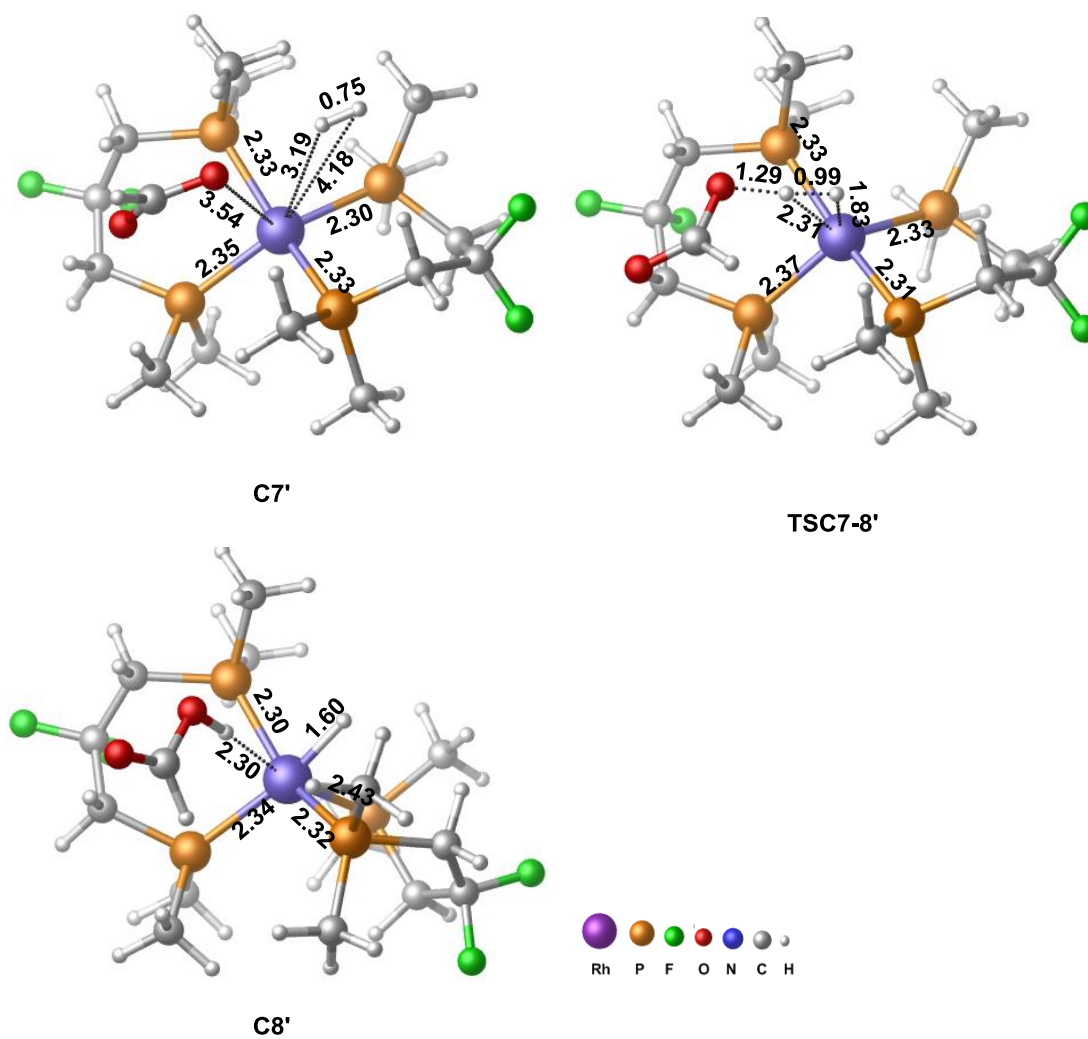

Figure S19. Optimized geometries with selected structural parameters (distances in Å) for the species involved in Figure S7 in the text.



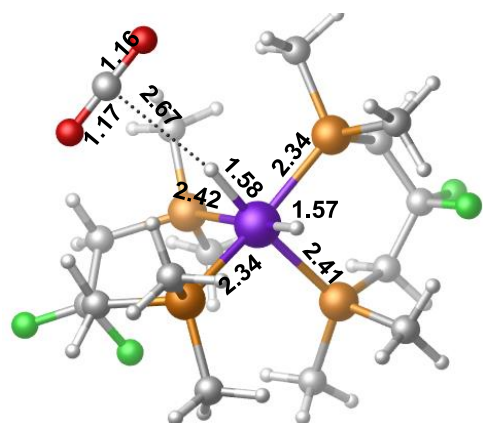

C10

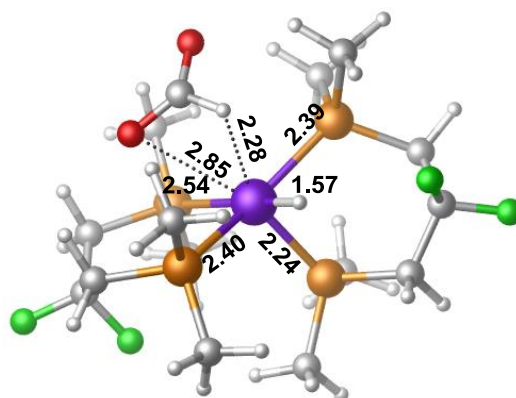

TSC10-11

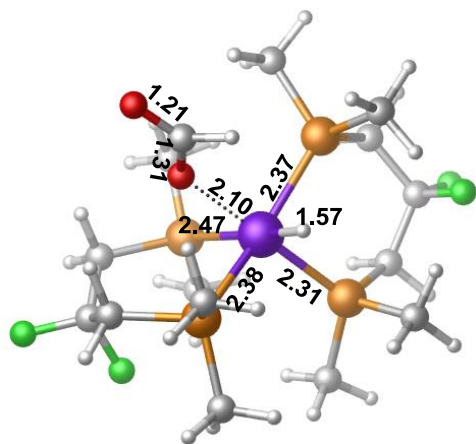

C11

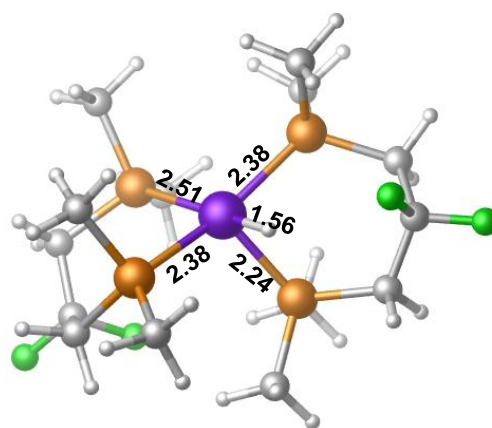

C12

Figure S20 continued

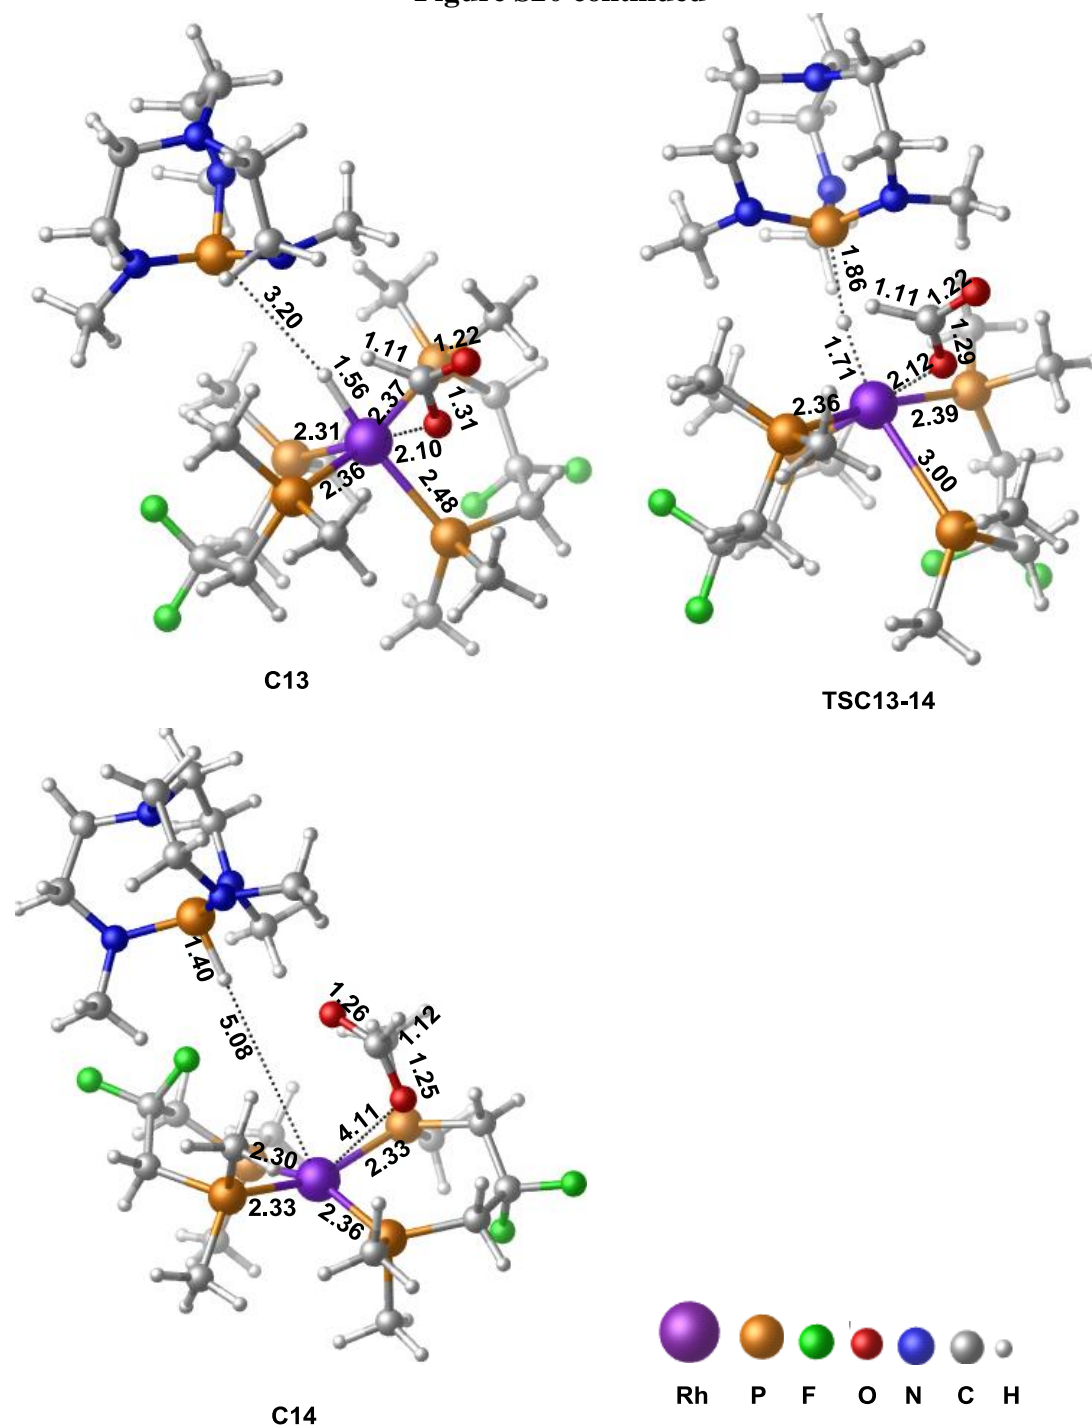

Figure S20. Optimized geometries with selected structural parameters (distances in Å) for the species involved in Figure S8 in the text.

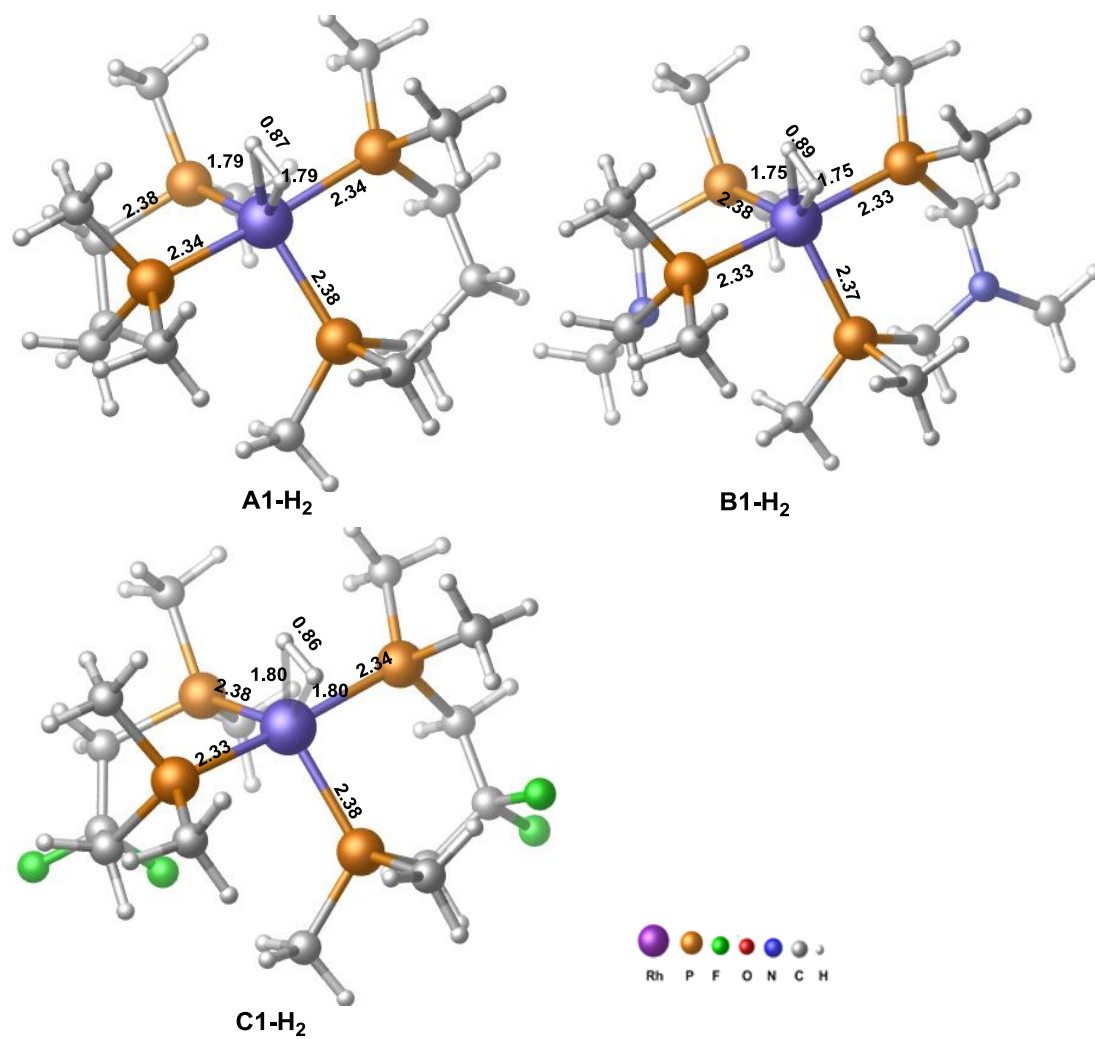

Figure S21. Optimized geometries with selected structural parameters (distances in Å) for the species of sigma-complex **A1-H<sub>2</sub>**, **B1-H<sub>2</sub>**, and **C1-H<sub>2</sub>**.

## Cartesian coordinates for all the complexes calculated in this study:

**A1****E= -690.67235935 a.u.**

|    |             |             |             |
|----|-------------|-------------|-------------|
| Rh | 0.00001400  | -0.00000600 | -0.00000900 |
| P  | 1.68986900  | 1.64375700  | -0.12122000 |
| P  | 1.68041400  | -1.63680500 | -0.17137700 |
| C  | 3.36141100  | 1.33947000  | 0.65672100  |
| H  | 4.10800500  | 1.74388300  | -0.03780000 |
| H  | 3.40526400  | 1.95972300  | 1.55744400  |
| C  | 3.45285500  | -1.09613000 | -0.10947600 |
| H  | 4.05976500  | -1.99933600 | 0.01386000  |
| H  | 3.73068900  | -0.66243400 | -1.07712800 |
| P  | -1.68985800 | -1.64372900 | 0.12131100  |
| P  | -1.68043600 | 1.63678800  | 0.17131200  |
| C  | -3.36122200 | -1.33952100 | -0.65700700 |
| H  | -4.10794800 | -1.74399400 | 0.03733700  |
| H  | -3.40480600 | -1.95978000 | -1.55774100 |
| C  | -3.45287900 | 1.09612600  | 0.10909500  |
| H  | -4.05976000 | 1.99932900  | -0.01439600 |
| C  | -3.73092300 | 0.66247300  | 1.07670300  |
| C  | -1.50280700 | -3.39154100 | -0.45430000 |
| H  | -1.39487000 | -3.40874300 | -1.54166900 |
| H  | -0.64413500 | -3.89430000 | -0.00951900 |
| H  | -2.40417700 | -3.95294700 | -0.19011600 |
| C  | 1.70910300  | -2.64565500 | -1.71194000 |
| H  | 1.82175800  | -1.97545400 | -2.56822700 |
| C  | 2.54467200  | -3.35177300 | -1.69798600 |
| H  | 0.77973600  | -3.19964000 | -1.83843400 |
| C  | 1.72008000  | -2.88578200 | 1.18970600  |
| H  | 0.74532600  | -3.34563500 | 1.35019900  |
| H  | 2.45221900  | -3.66969300 | 0.97457800  |
| H  | 2.00126400  | -2.38486200 | 2.11958500  |
| C  | -1.70931500 | 2.64530600  | 1.71208400  |
| H  | -2.54466900 | 3.35167600  | 1.69804400  |
| H  | -1.82244300 | 1.97492700  | 2.56817100  |
| C  | -0.77981200 | 3.19896100  | 1.83901100  |
| C  | -1.71996100 | 2.88603200  | -1.18954100 |
| H  | -0.74518300 | 3.34586000  | -1.34994700 |
| H  | -2.00117100 | 2.38530000  | -2.11951200 |
| H  | -2.45205800 | 3.66994500  | -0.97428100 |
| C  | 1.50274400  | 3.39142400  | 0.45482100  |
| H  | 0.64386800  | 3.89417900  | 0.01042700  |
| H  | 1.39510700  | 3.40832000  | 1.54222600  |
| H  | 2.40396100  | 3.95302700  | 0.19053400  |
| C  | 2.10320000  | 1.89840600  | -1.90274600 |
| H  | 2.89962000  | 2.63835400  | -2.02740900 |
| H  | 2.41741000  | 0.95259000  | -2.35032000 |
| C  | 1.21193000  | 2.23589300  | -2.43752700 |
| H  | -2.10341400 | -1.89805000 | 1.90284100  |
| H  | -2.41741800 | -0.95212700 | 2.35032400  |
| H  | -2.90000500 | -2.63781000 | 2.02753600  |
| H  | -1.21224900 | -2.23570300 | 2.43769800  |
| C  | -3.71615300 | 0.10055800  | -1.02379300 |
| C  | 3.71635500  | -0.10062400 | 1.02340800  |
| H  | -3.16147000 | 0.39434700  | -1.92316400 |
| H  | -4.77464300 | 0.13294800  | -1.30060900 |
| H  | 3.16180900  | -0.39443500 | 1.92285800  |
| H  | 4.77489200  | -0.13305400 | 1.30004200  |

**A1-H<sub>2</sub>****E= -691.84938001 a.u.**

|    |             |             |             |
|----|-------------|-------------|-------------|
| Rh | 0.00648600  | 0.03619100  | -0.59600900 |
| P  | -2.16490900 | 0.91768400  | -0.64464300 |
| P  | -0.81813400 | -1.85747200 | 0.58099700  |
| C  | -3.27231900 | 0.61037700  | 0.80006300  |
| C  | -2.85518300 | 1.14874900  | 1.65905100  |
| H  | -4.24165400 | 1.06917100  | 0.57415600  |
| H  | -2.22443700 | -1.54483700 | 1.75157600  |
| H  | -2.50864800 | -2.50976600 | 2.18738900  |
| H  | -1.82328600 | -0.93239000 | 2.56854000  |
| P  | 2.17409100  | -0.81505000 | -0.77174200 |
| P  | 0.92325800  | 1.86732700  | 0.61637600  |
| C  | 3.21328700  | -0.85700200 | 0.76733700  |
| H  | 4.25425600  | -0.68804900 | 0.46741900  |
| H  | 3.16494900  | -1.87359200 | 1.17055200  |
| C  | 2.61417500  | 1.57880300  | 1.34393200  |
| H  | 2.74694100  | 2.30021600  | 2.15722700  |
| C  | 3.37121900  | 1.82513200  | 0.59055200  |
| C  | 2.37497000  | -2.50850000 | -1.46232800 |
| H  | 1.88244900  | -3.25063300 | -0.83124600 |
| H  | 1.91224100  | -2.54164000 | -2.45204000 |
| H  | 3.43391500  | -2.76740200 | -1.55368700 |
| C  | 0.30082300  | -2.75853900 | 1.74434800  |
| H  | 0.67766300  | -2.06832100 | 2.50316100  |
| H  | -0.23562400 | -3.57220900 | 2.24194000  |
| H  | 1.15415200  | -3.18694100 | 1.21540500  |
| C  | -1.47271800 | -3.25878400 | -0.42673600 |

|   |             |             |             |
|---|-------------|-------------|-------------|
| H | -0.68088700 | -3.63142800 | -1.08162600 |
| H | -1.83830600 | -4.07797400 | -0.20043900 |
| H | -2.28589400 | -2.90705400 | -1.06656500 |
| C | 1.18838100  | 3.50100700  | -0.19876000 |
| H | 1.66693100  | 4.21290100  | 0.48119800  |
| H | 1.82084000  | 3.36449900  | -1.07981800 |
| H | 0.23641300  | 3.91769500  | -0.53377800 |
| C | -0.00016500 | 2.35188400  | 2.14264100  |
| H | -1.02683200 | 2.63437400  | 1.89875700  |
| H | -0.04080500 | 1.49873900  | 2.82562900  |
| H | 0.48063300  | 3.19410000  | 2.64978200  |
| C | -3.13987900 | 0.24964300  | -2.05485100 |
| H | -2.64524200 | 0.52270000  | -2.99015200 |
| H | -3.18080400 | -0.84034000 | -2.00362100 |
| H | -4.15760100 | 0.65097800  | -2.05594000 |
| C | -2.36452100 | 2.72917400  | -0.89996600 |
| H | -3.41789300 | 2.98224200  | -1.05046900 |
| H | -1.99217100 | 3.28505500  | -0.03675900 |
| H | -1.79419500 | 3.03225400  | -1.78164700 |
| C | 3.18764800  | 0.15575600  | -1.96381100 |
| C | 3.24415000  | 1.20212200  | -1.65777300 |
| H | 4.19980200  | -0.25145100 | -2.04534500 |
| H | 2.70660200  | 0.11861300  | -2.94445600 |
| H | 0.10235600  | 0.44372500  | -2.33589600 |
| H | -0.19349500 | -0.36963100 | -2.32319400 |
| C | 2.80884400  | 0.14569100  | 1.85621000  |
| H | 3.58175600  | 0.13547900  | 2.63073300  |
| H | 1.88588100  | -0.19631200 | 2.33884100  |
| C | -3.46618400 | -0.86725100 | 1.16204900  |
| H | -4.26725100 | -0.92618000 | 1.90579200  |
| H | -3.83125400 | -1.42792800 | 0.29283300  |

**A2****E= -691.86562002 a.u.**

|    |             |             |             |
|----|-------------|-------------|-------------|
| Rh | -0.05340300 | 0.05125600  | -0.55835300 |
| P  | -2.22854600 | 0.90973000  | -0.67206800 |
| P  | -0.78085000 | -1.51889000 | 1.12001300  |
| C  | -3.54178200 | -0.26627600 | -0.09004000 |
| H  | -3.67916300 | -0.13327400 | 0.98960100  |
| H  | -4.48122500 | 0.04279900  | -0.56096300 |
| C  | -2.31161200 | -2.43834700 | 0.58591100  |
| H  | -1.96946300 | -3.38276900 | 0.14942500  |
| H  | -2.87286600 | -2.69596900 | 1.49213000  |
| P  | 2.00542300  | -0.88513100 | -1.10894000 |
| P  | 1.06251600  | 1.75836600  | 0.73208900  |
| C  | 3.22460200  | -1.07050600 | 0.28602700  |
| H  | 4.22842100  | -0.94645900 | -0.13749200 |
| C  | 3.15942100  | -2.10688500 | 0.63478000  |
| C  | 2.84084600  | 1.35624300  | 1.09685200  |
| H  | 3.17376800  | 2.01323700  | 1.90716400  |
| H  | 3.44874400  | 1.61499500  | 0.22257700  |
| C  | 1.98857400  | -2.55766300 | -1.86370300 |
| H  | 1.48869700  | -3.26736600 | -1.20224100 |
| H  | 1.42925100  | -2.51204200 | -2.80090300 |
| C  | 3.00569300  | -2.96690300 | -2.06397200 |
| H  | -1.27489200 | -0.83425400 | 2.76249200  |
| H  | -1.92646400 | 0.03389800  | 2.63737700  |
| H  | -1.79374000 | -1.58545300 | 3.36535600  |
| C  | -0.38266500 | -0.51212700 | 3.30500400  |
| C  | 0.28600500  | -2.92163600 | 1.66325000  |
| H  | 1.18841400  | -2.54183500 | 2.14914600  |
| H  | -0.24824800 | -3.56431600 | 2.36933400  |
| H  | 0.58065800  | -3.52366300 | 0.80092300  |
| C  | 1.20428700  | 3.38554000  | -0.11239000 |
| H  | 1.83644300  | 4.07485000  | 0.45509200  |
| H  | 1.62709600  | 3.23688900  | -1.10870500 |
| C  | 0.21378100  | 3.83098900  | -0.23133300 |
| H  | 0.47519900  | 2.24602200  | 2.41166500  |
| H  | -0.59809100 | 2.44471900  | 2.40014600  |
| H  | 0.66515400  | 1.43671800  | 3.12040200  |
| C  | 0.99829500  | 3.14177300  | 2.75914600  |
| H  | -2.74166600 | 1.27456400  | -2.39471200 |
| H  | -2.05457300 | 2.00824700  | -2.82184000 |
| H  | -2.66781700 | 0.36083500  | -2.98850900 |
| C  | -3.76474900 | 1.65954400  | -2.43333600 |
| C  | -2.68485900 | 2.45174800  | 0.21962300  |
| H  | -3.73527200 | 2.70045100  | 0.04209400  |
| H  | -2.53380400 | 2.32211700  | 1.29399000  |
| H  | -2.06542300 | 3.28286500  | -0.12534100 |
| C  | 2.92925900  | 0.07862300  | -2.37250700 |
| H  | 3.07715600  | 1.10592800  | -2.03287800 |
| H  | 3.90066000  | -0.37708700 | -2.58546600 |
| H  | 2.33253500  | 0.11136600  | -3.28703900 |
| H  | 0.21155200  | 0.97002900  | -1.81408200 |
| H  | -0.62907200 | -0.95293900 | -1.63689000 |
| C  | -3.22951800 | -1.73270100 | -0.42310400 |
| C  | 3.03782700  | -0.11998700 | 1.47808200  |

H -2.78132000 -1.79505500 -1.42071600  
 H -4.16744100 -2.29441400 -0.47233800  
 H 2.18222600 -0.45463900 2.07942500  
 H 3.91480900 -0.21490900 2.12570600

C -0.06087600 2.89935100 1.31559300  
 H -0.64580200 3.71853000 1.74735000  
 H -0.75775100 2.30116700 0.71485600  
 C 3.80756300 -2.69264700 0.99745500  
 H 4.41206600 -3.47990100 1.45872400  
 H 3.62589800 -1.95074800 1.78384600

**A3**

**E= -1272.85456367 a.u.**

Rh 1.72821600 0.09788300 -0.33584700  
 P 1.55825700 2.34135600 -0.92373500  
 P 1.36262800 0.46665700 2.02566000  
 C 1.03789100 3.49375800 0.42083600  
 H 1.92155200 3.75585500 1.01605800  
 C 0.69198600 4.41735400 -0.05657200  
 H 0.48911100 2.05887800 2.46945300  
 H -0.32565600 1.79037000 3.15007200  
 H 1.19210000 2.66558400 3.05265600  
 P 1.35046100 -2.21158000 -0.43473000  
 P 4.11340500 -0.27396900 -0.45807600  
 C 2.46786100 -3.31035300 0.57349200  
 H 2.64305100 -4.22751200 -0.00153900  
 H 1.91055700 -3.60806200 1.46856000  
 C 4.60445300 -2.04150200 -0.14494400  
 H 5.67738300 -2.05570900 0.07571400  
 H 4.47544300 -2.60659300 -1.07544200  
 C -0.32155300 -2.84100300 -0.01854200  
 H -0.51020700 -2.73179500 1.04981700  
 H -1.06551400 -2.24082600 -0.54813000  
 H -0.41864300 -3.89512000 -0.29516200  
 C 2.74964500 0.52629500 3.24502900  
 H 3.44885900 1.32177800 2.97560400  
 H 2.36441900 0.72214400 4.25052400  
 H 3.28971400 -0.42342500 3.26334200  
 C 0.25903200 -0.77996600 2.80788100  
 H 0.73024400 -1.76631700 2.76733400  
 H 0.06163700 -0.53131000 3.85518800  
 -0.68200800 -0.80000600 2.24639600  
 C 4.90509200 0.03713800 -2.09045600  
 H 5.92937300 -0.34716700 -2.11372200  
 H 4.31718500 -0.44411000 -2.87563700  
 H 4.92972500 1.11029900 -2.29201300  
 C 5.25154300 0.61615300 0.68947100  
 H 5.03267500 1.68707400 0.67921200  
 H 5.10618600 0.24906800 1.70791700  
 H 6.29737900 0.46151700 0.40803600  
 C 0.25399800 2.60814600 -2.18569000  
 H 0.50624600 2.04412900 -3.08669300  
 H -0.69016200 2.21942200 -1.79200000  
 C 0.14788400 3.66875500 -2.43204800  
 C 3.00755500 3.19955800 -1.65976000  
 H 2.78062600 4.25331000 -1.84734200  
 H 3.86903200 3.13663000 -0.98991900  
 C 3.26241200 2.72095300 -2.60850200  
 H 1.56619900 -2.85920300 -2.14428100  
 H 2.56565400 -2.62118900 -2.51480400  
 H 1.41217300 -3.94185300 -2.18199400  
 H 0.84267500 -2.36365700 -2.79566500  
 H 1.68916600 -0.04677700 -1.91030700  
 H 0.16081900 0.21050000 -0.42019800  
 P -2.79201600 0.47738300 -0.31500400  
 N -4.15054300 1.57132200 -0.38211800  
 N -2.84909400 -0.30353400 1.25736000  
 N -2.94273900 -0.82407400 -1.44593100  
 C -3.06695600 0.64051300 2.34392300  
 C -2.55274000 1.58278800 2.12958000  
 H -1.99708900 -0.76841600 -2.55822100  
 C -2.49042600 -0.49192700 -3.50052900  
 C -3.78951100 2.87717000 -0.92815700  
 C -2.72695200 3.07245500 -0.76286200  
 C -3.86892400 -1.95139600 -1.57797800  
 H -3.44111200 -2.84576200 -1.09846600  
 C -3.94582000 -2.19735900 -2.64456000  
 H -5.30059500 -1.72583400 -1.07095700  
 H -5.84688800 -1.13842600 -1.81409600  
 H -5.79195400 -2.71362300 -1.02845400  
 C -3.39661100 -1.62646600 1.50536400  
 H -2.92966700 -2.32869000 0.81284800  
 C -3.09388200 -1.94014400 2.51440500  
 C -4.93038300 -1.70814000 1.37432800  
 H -5.23621200 -2.76719900 1.38082900  
 H -5.40254800 -1.24240000 2.24522500  
 C -5.55456100 1.27457400 -0.63622800  
 H -5.70709500 1.01858600 -1.69910100  
 H -6.13419000 2.19022100 -0.46197500  
 C -6.13279000 0.18703000 0.25789300  
 H -6.11352900 0.53877200 1.29333800  
 H -7.19321600 0.04665500 -0.01567500  
 N -5.38285800 -1.04110500 0.18700100  
 H -4.12552900 0.88709100 2.50859300  
 H -2.65829900 0.22914100 3.27583200  
 H -4.36016100 3.66710300 -0.42473800  
 H -3.98719300 2.95409100 -2.00946600  
 H -1.20362500 -0.04743100 -2.34976100  
 H -1.52199000 -1.74883300 -2.71033600

**A4**

**E= -1272.83525136 a.u.**

Rh 1.68332000 0.09963600 -0.27425500  
 P 1.09330500 2.19016100 -0.96591100  
 P 1.89484900 0.79589300 1.95467300  
 C 0.48879600 3.40204300 0.32500700  
 H 1.36054600 3.95358400 0.69878800  
 C -0.15709200 4.14267500 -0.16190300  
 H 0.70179500 2.12984100 2.54875800  
 H 0.10162100 1.69183200 3.35510900  
 H 1.28949100 2.93411400 3.00781900  
 P 1.34737300 -2.18880600 0.02618100  
 C 3.97430300 -0.29945700 -0.98414400  
 P 2.73862100 -3.08721000 0.91269300  
 H 2.82239200 -4.09182800 0.47801800  
 H 2.41928400 -3.22804800 1.95220900  
 C 4.62486700 -1.98209900 -0.48315200  
 H 5.72077100 -1.96007400 -0.50048500  
 H 4.32033600 -2.71519500 -1.23933000  
 C -0.08574000 -3.01598700 0.87386800  
 H -0.09072900 -2.73947300 1.93160100  
 H -1.02481200 -2.67514200 0.42690300  
 H -0.01995200 -4.10738800 0.79924500  
 C 3.50116400 1.55342800 2.48669000  
 H 3.78096400 2.34365000 1.78477800  
 H 3.44771200 1.96816100 3.49863400  
 H 4.28287000 0.78959500 2.46245200  
 C 1.69925500 -0.42993300 3.33285400  
 H 2.46343700 -1.20617500 3.23866500  
 H 1.80032300 0.04410900 4.31459600  
 C 0.71869200 -0.90813200 3.26701500  
 H 4.27014800 -0.35818300 -2.80921800  
 H 5.27741700 -0.71066700 -3.05672400  
 H 3.52839700 -1.01636400 -3.26934100  
 H 4.13231300 0.64216800 -3.22945500  
 C 5.41601600 0.75237800 -0.47057200  
 H 5.20552800 1.80205400 -0.69367200  
 H 5.57501900 0.66233500 0.60681100  
 H 6.33676200 0.45694400 -0.98560900  
 C -0.17112000 2.36400900 -2.31081400  
 H 0.23754500 1.88552000 -3.20525000  
 H -1.08742400 1.83140400 -2.04891800  
 H -0.40354700 3.41125000 -2.53466300  
 C 2.43634900 3.21736300 -1.72349700  
 H 2.08692300 4.21450000 -2.01292700  
 H 3.25245600 3.31826200 -1.00255400  
 C 2.82436200 2.70461000 -2.60778500  
 H 1.31460900 -3.12997300 -1.56910600  
 H 2.19805500 -2.87519200 -2.15810700  
 H 1.28817900 -4.21262100 -1.40544100  
 H 0.44146000 -2.82646300 -2.14993500  
 H 1.23249200 -0.25617100 -1.77209500  
 H -1.92709200 0.55949000 -0.20102800  
 P -3.24306900 0.04566000 -0.14419500  
 N -4.02605900 1.55657600 -0.02700000  
 N -3.00330600 -0.84958500 1.28077500  
 C -3.17067700 -0.74838300 -1.63954900  
 N -1.91391500 -0.44279900 2.16556500  
 H -1.00668200 -0.24530600 1.58294600  
 C -1.86487500 -1.10762000 -2.19381600  
 H -1.82746200 -0.85609400 -3.25859800  
 C -3.34359800 2.76069900 -0.49155000  
 H -2.26849200 2.67334000 -0.34651100  
 C -4.25311300 -1.60024500 -2.08982600  
 H -4.05224900 -2.65306200 -1.83567000  
 H -4.34204800 -1.54693300 -3.17984000  
 C -5.53770900 -1.10786900 -1.44451800  
 H -5.89503000 -0.21462700 -1.96076900  
 H -6.33218800 -1.86047700 -1.46224300  
 C -4.11283300 -1.51007800 1.93772000  
 H -3.75892200 -2.41474600 2.44253800  
 H -4.56441700 -0.86486500 2.70778600  
 C -5.11891000 -1.88465600 0.86136300  
 H -4.75297600 -2.74559300 0.29776300  
 H -6.10460500 -2.12738500 1.27085200  
 C -5.47179300 1.65147900 -0.09639700  
 H -5.80752400 1.82895000 -1.13031600  
 H -5.81778600 2.50019400 0.50237400  
 C -6.04419200 0.36090500 0.46278800  
 H -5.96687600 0.36469300 1.55181800  
 H -7.09307400 0.20900100 0.18911000  
 N -5.20374800 -0.73338100 -0.05731200  
 H -2.17287600 0.44293100 2.76296200  
 H -1.69646500 -1.26812600 2.84913500  
 H -3.68830300 3.61778700 0.09476700  
 H -3.53974700 2.95696700 -1.55432100

|   |             |             |             |
|---|-------------|-------------|-------------|
| H | -1.04547800 | -0.58844400 | -1.68436300 |
| H | -1.69546300 | -2.18657000 | -2.08123900 |
| C | -0.23546000 | 2.73020700  | 1.49797500  |
| H | -0.88468800 | 3.46120500  | 1.99591500  |
| H | -0.88534300 | 1.93678900  | 1.11508100  |
| C | 4.11548900  | -2.40570500 | 0.90507400  |
| H | 4.83292000  | -3.09610600 | 1.36285600  |
| H | 4.08370300  | -1.52280500 | 1.55721300  |

**A5****E= -691.41198547 a.u.**

|    |             |             |             |
|----|-------------|-------------|-------------|
| Rh | 0.00342500  | -0.02473600 | -0.34271100 |
| P  | -1.78598400 | -1.49479500 | -0.55994900 |
| P  | -1.13867400 | 1.92220400  | 0.24524200  |
| C  | -3.36077400 | -0.58714000 | -0.97926800 |
| H  | -3.26014500 | -0.25264300 | -2.01907500 |
| H  | -4.19413200 | -1.30199900 | -0.95004400 |
| C  | -2.89266000 | 1.90547400  | -0.39026800 |
| H  | -3.42474700 | 2.77562600  | 0.01738000  |
| C  | -2.83124100 | 2.04543700  | -1.47645900 |
| P  | 0.97947700  | -0.76737200 | 1.63441000  |
| P  | 2.06453400  | 0.07205200  | -1.34370000 |
| C  | 2.52395000  | 0.14348900  | 2.17509000  |
| H  | 3.20597500  | -0.57761200 | 2.64471300  |
| H  | 2.21850100  | 0.84601500  | 2.95950000  |
| C  | 3.54484800  | 0.11010200  | -0.20096500 |
| H  | 4.39828300  | 0.53334700  | -0.74418000 |
| H  | 3.81810900  | -0.92137400 | 0.05560300  |
| C  | 0.05818200  | -0.80359700 | 3.24002600  |
| H  | -0.32915900 | 0.19430300  | 3.45863500  |
| H  | -0.78935300 | -1.48861500 | 3.15262100  |
| H  | 0.69741700  | -1.13229000 | 4.06672300  |
| C  | -0.59533000 | 3.55567300  | -0.44543000 |
| H  | -0.44938300 | 3.44501800  | -1.52332300 |
| H  | -1.31943200 | 4.35687400  | -0.25363100 |
| C  | 0.36639400  | 3.82777600  | -0.00032400 |
| H  | -1.44988900 | 2.43429700  | 2.00497200  |
| C  | -0.49061500 | 2.57949800  | 2.51166100  |
| H  | -2.03064700 | 3.36193300  | 2.07156900  |
| H  | -1.99057100 | 1.63856000  | 2.52609000  |
| C  | 2.61809700  | -1.22213800 | -2.55008200 |
| H  | 3.62665300  | -1.03543700 | -2.93782900 |
| H  | 2.58828900  | -2.20001700 | -2.06148700 |
| H  | 1.90815500  | -1.24417700 | -3.38162900 |
| C  | 2.39918800  | 1.59223600  | -2.35081100 |
| H  | 1.62512400  | 1.67547100  | -3.11810700 |
| H  | 2.32444800  | 2.47165700  | -1.70501400 |
| H  | 3.38664900  | 1.57006700  | -2.82597300 |
| C  | -2.40652900 | -2.52387500 | 0.85901600  |
| H  | -1.62052300 | -3.20533200 | 1.19771600  |
| H  | -2.66805000 | -1.86707800 | 1.69417100  |
| C  | -3.28884300 | -3.11305700 | 0.58289900  |
| H  | -1.81674200 | -2.77352400 | -1.90093900 |
| C  | -2.78871200 | -3.27479300 | -1.98502200 |
| H  | -1.57370900 | -2.28491100 | -2.84819100 |
| H  | -1.04104300 | -3.51770600 | -1.69899700 |
| H  | 1.59783500  | -2.51564000 | 1.60659000  |
| C  | 2.30562500  | -2.63217200 | 0.78178700  |
| H  | 2.08508400  | -2.80095300 | 2.54593200  |
| H  | 0.75723800  | -3.18843300 | 1.41627100  |
| H  | -0.50135500 | 0.40008000  | -1.80774700 |
| C  | -3.68292400 | 0.62148800  | -0.08168000 |
| C  | 3.25836100  | 0.92170400  | 1.07300300  |
| H  | 2.66188700  | 1.80445300  | 0.80890300  |
| H  | 4.20010700  | 1.29670600  | 1.49149700  |
| H  | -4.75002700 | 0.84697800  | -0.19556400 |
| H  | -3.55034400 | 0.34932100  | 0.97534100  |

**A6****E= -879.94404708 a.u.**

|    |             |             |             |
|----|-------------|-------------|-------------|
| Rh | 0.13252900  | 0.00574600  | -0.10044200 |
| P  | -1.30785500 | -1.17726500 | -1.49879800 |
| P  | -0.81854100 | -0.49931000 | 1.97148700  |
| C  | -2.99777400 | -1.35080700 | -0.72836700 |
| H  | -3.46037700 | -0.35692500 | -0.76112500 |
| H  | -3.60747100 | -2.00455200 | -1.36654100 |
| C  | -2.64082200 | -0.86670600 | 1.81078000  |
| H  | -3.01718800 | -1.21847800 | 2.78105400  |
| H  | -3.13325100 | 0.09238800  | 1.60829200  |
| P  | 2.06004300  | -1.29001400 | -0.20679200 |
| P  | 1.37615600  | 1.91017000  | -0.40165000 |
| C  | 3.52771900  | -0.65248300 | 0.76758300  |
| H  | 4.44355800  | -0.88799700 | 0.20950800  |
| H  | 3.56616900  | -1.23441700 | 1.69609500  |
| C  | 3.21007000  | 1.76829900  | -0.07147900 |
| C  | 3.61524600  | 2.77117800  | 0.10906500  |
| C  | 3.70246700  | 1.38959300  | -0.97602000 |
| H  | 2.08785300  | -3.06647000 | 0.31591200  |
| H  | 1.76553800  | -3.14621600 | 1.35685100  |
| H  | 1.38921900  | -3.63504100 | -0.30362700 |
| H  | 3.08787300  | -3.50198700 | 0.21421900  |

|   |             |             |             |
|---|-------------|-------------|-------------|
| C | -0.90305800 | 0.80502000  | 3.28519300  |
| H | -1.30066000 | 1.71943700  | 2.83687800  |
| H | -1.53310200 | 0.50962000  | 4.13305300  |
| H | 0.10825800  | 1.01418800  | 3.64664800  |
| C | -0.29717500 | -1.94891000 | 3.01026700  |
| H | 0.75786300  | -1.83657500 | 3.27899700  |
| H | -0.89004500 | -2.03621300 | 3.92839400  |
| H | -0.40210900 | -2.87077200 | 2.43022700  |
| C | 1.40148000  | 2.79990100  | -2.02732500 |
| H | 2.03729900  | 3.69311100  | -2.00981900 |
| H | 1.75536700  | 2.11340700  | -2.80165500 |
| H | 0.37724400  | 3.08683800  | -2.28191400 |
| C | 0.96222300  | 3.32527600  | 0.72234200  |
| H | -0.10035000 | 3.55835400  | 0.61938700  |
| H | 1.13118200  | 3.01821200  | 1.75828800  |
| H | 1.55680300  | 4.22005800  | 0.50493600  |
| C | -1.00472500 | -2.95353500 | -1.95428800 |
| H | -0.06905300 | -3.03780900 | -2.51492400 |
| H | -0.90589800 | -3.54837100 | -1.04144200 |
| H | -1.81792000 | -3.36672400 | -2.56204400 |
| C | -1.80032900 | -0.51288400 | -3.15623400 |
| H | -2.60787900 | -1.09313300 | -3.61896200 |
| H | -2.12033300 | 0.52460900  | -3.03162400 |
| C | -0.92626400 | -0.52091200 | -3.81401100 |
| H | 2.80437700  | -1.46958600 | -1.89567900 |
| H | 2.97037200  | -0.47834800 | -2.32487100 |
| H | 3.74999500  | -2.02321200 | -1.87864800 |
| H | 2.09285000  | -1.99200000 | -2.54115600 |
| H | -1.08433900 | 1.04583100  | -0.13780600 |
| C | -3.00913200 | 2.69299100  | -0.33010100 |
| O | -3.13839300 | 2.49014800  | -1.47038900 |
| O | -2.91954000 | 2.92762900  | 0.80837300  |
| C | -3.01496900 | -1.88188800 | 0.71670900  |
| C | 3.49603400  | 0.84153800  | 1.12096300  |
| H | -4.02990100 | -2.24051800 | 0.92674900  |
| H | -2.37030000 | -2.76896300 | 0.79599800  |
| H | 2.73217700  | 1.00379000  | 1.89221800  |
| H | 4.45891300  | 1.10553400  | 1.57397000  |

**A7****E= -879.96276654 a.u.**

|    |             |             |             |
|----|-------------|-------------|-------------|
| Rh | 0.13785600  | -0.11778800 | 0.14407100  |
| P  | -1.41453100 | -1.80126500 | -0.30150600 |
| P  | -1.58834600 | 1.10815400  | 1.18901200  |
| C  | -3.12816800 | -1.25617400 | -0.73035000 |
| H  | -3.01855500 | -0.66690900 | -1.64626200 |
| H  | -3.70093200 | -2.16078200 | -0.97025500 |
| C  | -3.31206200 | 0.97699100  | 0.52242200  |
| H  | -3.96788400 | 1.53865800  | 1.19933900  |
| H  | -3.29865100 | 1.50418000  | -0.43700500 |
| P  | 1.94465400  | -1.53000100 | 0.12925300  |
| P  | 1.65718000  | 1.61584300  | -0.27080700 |
| C  | 3.31125700  | -1.02676700 | 1.30541700  |
| H  | 4.25726100  | -1.39630000 | 0.88777700  |
| H  | 3.13681200  | -1.57755900 | 2.23591400  |
| C  | 3.39742400  | 1.35130000  | 0.36494100  |
| H  | 3.83815000  | 2.33212500  | 0.57177600  |
| H  | 4.00638900  | 0.90020700  | -0.42785300 |
| C  | 1.76723600  | -3.28439900 | 0.69237500  |
| H  | 1.28813300  | -3.29852200 | 1.67445700  |
| H  | 1.15684500  | -3.86267900 | -0.00508200 |
| H  | 2.75090400  | -3.75931100 | 0.76908700  |
| C  | -1.56190700 | 2.92015400  | 1.51473200  |
| H  | -1.57335900 | 3.43437900  | 0.55170400  |
| H  | -2.44446200 | 3.20490700  | 2.09715900  |
| H  | -0.66693900 | 3.19818700  | 2.07442400  |
| C  | -1.81556400 | 0.46815500  | 2.91354300  |
| H  | -0.90759100 | 0.67293300  | 3.48713500  |
| H  | -2.67137600 | 0.93869100  | 3.41081300  |
| H  | -1.95724100 | -0.61510800 | 2.89772500  |
| C  | 1.90843000  | 1.77913400  | -2.08629600 |
| H  | 2.81539400  | 2.35508300  | -2.29865500 |
| H  | 1.96208900  | 0.79841200  | -2.56081300 |
| H  | 1.03369100  | 2.29629700  | -2.48304500 |
| C  | 1.40257700  | 3.38535600  | 0.16861700  |
| H  | 0.45160300  | 3.70338600  | -0.26209600 |
| H  | 1.39046600  | 3.52133600  | 1.25258000  |
| H  | 2.21325400  | 3.98594000  | -0.25648200 |
| C  | -1.79140700 | -3.17772400 | 0.87845000  |
| H  | -0.88604400 | -3.72467500 | 1.14416600  |
| H  | -2.21625100 | -2.76423400 | 1.79746400  |
| C  | -2.51311100 | -3.87562400 | 0.44092500  |
| H  | -0.98489600 | -2.68643500 | -1.85753300 |
| H  | -1.76797600 | -3.39820900 | -2.13825300 |
| H  | -0.88399100 | -1.91570800 | -2.62752800 |
| H  | -0.03763000 | -3.22075900 | -1.75626700 |
| C  | 2.88419700  | -1.82053600 | -1.44331200 |
| C  | 3.32252500  | -0.88502900 | -1.79795000 |
| H  | 3.68386900  | -2.55669600 | -1.30789500 |
| H  | 2.19110200  | -2.17314600 | -2.21204000 |
| H  | -2.01865300 | 2.02562600  | -3.44459700 |
| H  | -1.47737000 | 1.66876100  | -2.53451200 |
| C  | -1.17680100 | 0.44882300  | -2.51726400 |

|   |             |             |             |
|---|-------------|-------------|-------------|
| O | -1.24269700 | 2.53415400  | -1.65499600 |
| C | -3.85424700 | -0.44354000 | 0.34416300  |
| C | 3.42220500  | 0.46859000  | 1.61816300  |
| H | -4.90986100 | -0.36818500 | 0.05816300  |
| H | -3.84723900 | -0.97626400 | 1.30517000  |
| H | 2.59903800  | 0.75782300  | 2.28296500  |
| H | 4.35209200  | 0.63602600  | 2.17404900  |

**A8**

**E= -879.94541843 a.u.**

|    |             |             |             |
|----|-------------|-------------|-------------|
| Rh | 0.19114300  | -0.13826700 | -0.26109700 |
| P  | 1.14262400  | 1.99627400  | -0.28748400 |
| P  | 2.17328300  | -1.42548100 | -0.02771500 |
| C  | 2.90934800  | 1.94998400  | -0.89175800 |
| H  | 2.86268600  | 1.76170000  | -1.97155300 |
| H  | 3.33699100  | 2.95278300  | -0.76019100 |
| C  | 3.64186700  | -0.52913200 | -0.74120300 |
| H  | 4.54739100  | -1.11627100 | -0.53818500 |
| H  | 3.50339200  | -0.51478000 | -1.82917300 |
| P  | -0.84086200 | -0.35279300 | 1.83281100  |
| P  | -1.55120100 | -1.16671400 | -1.34873100 |
| C  | -2.69700500 | -0.51059300 | 1.84603600  |
| H  | -3.11131800 | 0.47128800  | 1.58854900  |
| C  | -3.00619900 | -0.72114800 | 2.87762800  |
| H  | -3.24666900 | -1.20704300 | -0.58067100 |
| H  | -3.86730900 | -1.91067600 | -1.15043600 |
| C  | -3.68768800 | -0.21291800 | -0.71914400 |
| H  | -0.40931300 | -1.85952000 | 2.82702800  |
| H  | -0.46617700 | -2.74889800 | 2.19377000  |
| H  | 0.61913500  | -1.76332700 | 3.18301000  |
| C  | -1.07094700 | -1.98360100 | 3.69149800  |
| C  | 2.33840500  | -3.01392200 | -0.97305700 |
| H  | 2.10032300  | -2.82210300 | -2.02315300 |
| C  | 3.34793500  | -3.43677100 | -0.90396200 |
| H  | 1.61805300  | -3.74278800 | -0.59086300 |
| C  | 2.91917300  | -1.98271400 | 1.58370000  |
| C  | 2.28402300  | -2.75190100 | 2.03118500  |
| H  | 3.92395200  | -2.39862200 | 1.44349100  |
| H  | 2.97404200  | -1.14005000 | 2.27946100  |
| C  | -1.99602100 | -0.59685500 | -3.05032100 |
| H  | -2.82528900 | -1.17504800 | -3.47389300 |
| H  | -2.26681100 | 0.46025700  | -3.01319400 |
| H  | -1.11524800 | -0.70080700 | -3.68942000 |
| C  | -1.33160400 | -2.98010200 | -1.69038900 |
| H  | -0.41565700 | -3.11634900 | -2.27122100 |
| H  | -1.20502600 | -3.51321400 | -0.74342500 |
| H  | -2.17717100 | -3.41035700 | -2.23977600 |
| C  | 1.37579100  | 3.03348000  | 1.23448700  |
| H  | 0.40078100  | 3.29795200  | 1.65064100  |
| H  | 1.92344300  | 2.46057000  | 1.98816400  |
| H  | 1.92943200  | 3.95318100  | 1.01309500  |
| C  | 0.53832600  | 3.31962500  | -1.44510700 |
| H  | 1.28120600  | 4.11635400  | -1.57239400 |
| H  | 0.31638900  | 2.86791900  | -2.41484700 |
| H  | -0.37698100 | 3.76981100  | -1.05297700 |
| C  | -0.65402200 | 0.92892300  | 3.15451000  |
| H  | -1.07877000 | 1.87234700  | 2.80507100  |
| H  | -1.15768500 | 0.62857600  | 4.07970300  |
| H  | 0.40849100  | 1.08441800  | 3.35888500  |
| H  | 0.73164900  | -0.02972900 | -1.76564600 |
| C  | -2.61353700 | 2.56649200  | -0.30360600 |
| O  | -2.27056400 | 2.91944300  | 0.75408400  |
| O  | -3.00526000 | 2.26038100  | -1.35681100 |
| C  | 3.82524300  | 0.90885900  | -0.23101300 |
| H  | 4.86389100  | 1.20589600  | -0.41953900 |
| C  | 3.70264400  | 0.93990300  | 0.86121100  |
| C  | -3.27242400 | -1.58088200 | 0.90727200  |
| H  | -4.31437600 | -1.76386500 | 1.19621100  |
| H  | -2.75102000 | -2.53519800 | 1.06391800  |

**A10**

**E= -880.39574194 a.u.**

|    |             |             |             |
|----|-------------|-------------|-------------|
| Rh | -0.07753600 | 0.05496500  | -0.35933400 |
| P  | -0.61055100 | 2.31369900  | -0.03737600 |
| P  | -2.36399200 | -0.58532400 | 0.06921100  |
| C  | -2.42640200 | 2.67684100  | -0.04716300 |
| H  | -2.84965900 | 2.43254700  | 0.93429700  |
| H  | -2.53998800 | 3.75884300  | -0.17458100 |
| C  | -3.60339800 | 0.50003700  | -0.80338100 |
| H  | -3.88585100 | -0.02632600 | -1.72118300 |
| H  | -4.50102000 | 0.53508600  | -0.17472900 |
| P  | 0.71025100  | -1.94617400 | -1.26731800 |
| P  | 1.00891000  | -0.49842100 | 1.73274400  |
| C  | 0.49321200  | -3.46726800 | -0.21404300 |
| H  | 1.34303200  | -4.13021900 | -0.41535800 |
| H  | -0.39880600 | -3.98734000 | -0.57924900 |
| C  | 1.44194200  | -2.30270700 | 1.88642600  |
| H  | 1.59844500  | -2.51848700 | 2.94852700  |
| H  | 2.40537600  | -2.47500500 | 1.39353000  |
| C  | 0.01668900  | -2.46613700 | -2.88441000 |
| H  | -1.06505300 | -2.58924000 | -2.81177000 |
| H  | 0.22453500  | -1.68748700 | -3.62167700 |
| H  | 0.46455600  | -3.40810400 | -3.21426400 |
| C  | -2.95784300 | -0.53558700 | 1.81805900  |
| H  | -2.68998300 | 0.41142200  | 2.29287100  |
| H  | -4.04280300 | -0.66649900 | 1.87022800  |
| H  | -2.48792500 | -1.34561100 | 2.38195100  |
| C  | -2.98711800 | -2.24750900 | -0.43006300 |
| H  | -2.47467500 | -3.03200000 | 0.13193000  |
| H  | -4.06153600 | -2.32902900 | -0.24035900 |
| H  | -2.81009300 | -2.40590500 | -1.49598800 |
| C  | 2.64930500  | 0.29284100  | 1.98900800  |
| H  | 3.12031500  | -0.05557400 | 2.91275500  |
| H  | 3.29761100  | 0.04396600  | 1.14497600  |
| H  | 2.53739200  | 1.37855200  | 2.03325500  |
| C  | 0.19171700  | -0.20460500 | 3.36099900  |
| H  | -0.20272800 | 0.81149800  | 3.41950100  |
| H  | -0.63914100 | -0.90084600 | 3.49129200  |
| H  | 0.90291600  | -0.35546500 | 4.17835800  |
| C  | -0.00122700 | 3.38608400  | -1.39510700 |
| H  | 1.08791400  | 3.33587100  | -1.42679000 |
| H  | -0.38902900 | 3.02014400  | -2.34786900 |
| H  | -0.31159600 | 4.42373800  | -1.24282900 |
| C  | -0.02555800 | 3.20361100  | 1.45943700  |
| H  | -0.34649700 | 4.24920000  | 1.43314900  |
| H  | -0.42718900 | 2.73676700  | 2.36142800  |
| H  | 1.06600200  | 3.17541500  | 1.49689000  |
| C  | 2.51112600  | -1.92422700 | -1.63088300 |
| H  | 3.08146900  | -1.68861800 | -0.73006000 |
| H  | 2.84422200  | -2.88734000 | -2.02880900 |
| H  | 2.71155900  | -1.13831100 | -2.36211800 |
| H  | 1.31365000  | 0.62967000  | -0.83602200 |

**A9**

**E= -879.94935964 a.u.**

|    |             |             |             |
|----|-------------|-------------|-------------|
| Rh | -0.04766500 | -0.06264200 | -0.34923300 |
| P  | -1.98312700 | -1.40397200 | -0.35340500 |
| P  | -1.37588000 | 1.93399700  | 0.27242200  |
| C  | -3.52278700 | -0.55851300 | -0.95079600 |
| H  | -3.36402500 | -0.35707700 | -2.01695800 |
| H  | -4.33766800 | -1.28959800 | -0.88094900 |
| C  | -3.04262100 | 1.94491400  | -0.54869900 |
| H  | -3.55869900 | 2.86566700  | -0.24828400 |
| H  | -2.86687600 | 2.00760900  | -1.62929700 |
| P  | 1.06982900  | -0.48629700 | 1.76731500  |
| P  | 1.93527400  | 0.85552200  | -1.19493000 |
| C  | 2.82809500  | -1.04760400 | 1.57668400  |
| H  | 2.77679400  | -2.02693500 | 1.09161100  |
| H  | 3.23387100  | -1.19275700 | 2.58595100  |
| C  | 3.48742100  | -0.03110700 | -0.71760000 |
| H  | 4.32252500  | 0.48114800  | -1.21189700 |
| H  | 3.41222400  | -1.03459700 | -1.14828700 |
| C  | 1.29765400  | 0.93223400  | 2.94241700  |
| H  | 1.59317600  | 1.83743600  | 2.40470800  |

|   |             |             |             |
|---|-------------|-------------|-------------|
| H | -0.55018300 | 0.38406200  | -1.83197000 |
| C | 3.76086100  | 1.98122800  | -0.80760300 |
| O | 4.25726200  | 1.04571700  | -1.29052200 |
| O | 3.26577700  | 2.91526600  | -0.31486800 |
| C | -3.16003200 | 1.92285800  | -1.16803700 |
| H | -4.05216000 | 2.48702700  | -1.45668400 |
| H | -2.52542100 | 1.88268100  | -2.06044400 |
| C | 0.36489700  | -3.22741600 | 1.29734500  |
| H | 0.40699300  | -4.19949100 | 1.79815900  |
| H | -0.62814700 | -2.81589500 | 1.51977600  |

**A11**

**E= -880.39991528 a.u.**

|    |             |             |             |
|----|-------------|-------------|-------------|
| Rh | -0.10039200 | -0.06939900 | -0.37116400 |
| P  | -2.17700900 | 1.08968700  | -0.34436900 |
| P  | -1.18094800 | -1.76834000 | 0.72105600  |
| C  | -3.66394200 | -0.02754300 | -0.27920600 |
| H  | -3.94522200 | -0.19795900 | 0.76582500  |
| H  | -4.49310100 | 0.52643300  | -0.73074100 |
| C  | -2.65760200 | -2.39671700 | -0.20452000 |
| H  | -2.29183600 | -3.17817400 | -0.87867500 |
| C  | -3.30647800 | -2.88720700 | 0.53051800  |
| P  | 1.91193900  | -1.08013500 | -1.14961500 |
| P  | 1.15780900  | 0.80869300  | 1.57803700  |
| C  | 3.36329800  | 0.05451600  | -1.00977000 |
| H  | 3.12888700  | 0.92119300  | -1.63340700 |
| H  | 4.20698500  | -0.46667400 | -1.47727300 |
| C  | 2.79722500  | 1.50176300  | 1.06827800  |
| H  | 3.26594900  | 1.90239100  | 1.97456400  |
| H  | 2.60286300  | 2.35256400  | 0.41023900  |
| C  | 2.59099900  | -2.67100800 | -0.52309000 |
| H  | 2.72304100  | -2.64902500 | 0.56080300  |
| H  | 1.92418600  | -3.49631000 | -0.77801400 |
| C  | 3.56279200  | -2.85868200 | -0.98898200 |
| H  | -1.85537100 | -1.31767000 | 2.37682700  |
| H  | -2.34813700 | -0.34524900 | 2.35534600  |
| C  | -2.57143400 | -2.07264800 | 2.71337500  |
| H  | -1.04235600 | -1.26955400 | 3.10238100  |
| C  | -0.30485600 | -3.32958600 | 1.11955300  |
| H  | 0.59216500  | -3.12089600 | 1.70554500  |
| H  | -0.96269400 | -3.98340100 | 1.69929900  |
| H  | -0.01965700 | -3.84590300 | 0.20176400  |
| C  | 0.48679300  | 2.13203100  | 2.65796800  |
| H  | 1.20961500  | 2.39466800  | 3.43590700  |
| H  | 0.27356200  | 3.00584500  | 2.04064000  |
| H  | -0.43556000 | 1.79140500  | 3.13524700  |
| C  | 1.71378900  | -0.43317600 | 2.83459000  |
| H  | 0.88392900  | -0.73666900 | 3.47563200  |
| H  | 2.11953700  | -1.32657400 | 2.35398000  |
| C  | 2.48913500  | -0.00381200 | 3.47661600  |
| H  | -2.43373800 | 1.96809900  | -1.93313600 |
| H  | -1.76916800 | 2.83024500  | -1.98104800 |
| C  | -2.20712000 | 1.30096300  | -2.76647900 |
| H  | -3.46857000 | 2.31456700  | -2.00207900 |
| C  | -2.56410300 | 2.35916500  | 0.91724400  |
| H  | -3.56146700 | 2.77167600  | 0.73866300  |
| H  | -2.53330500 | 1.92948900  | 1.92086800  |
| H  | -1.81609500 | 3.14981100  | 0.84181300  |
| C  | 1.80165400  | -1.35566200 | -2.95565500 |
| H  | 1.45971000  | -0.42527900 | -3.41411300 |
| H  | 2.77117200  | -1.64306600 | -3.37253800 |
| H  | 1.06812000  | -2.13859500 | -3.16103000 |
| H  | 1.18589300  | 3.29455800  | -2.16421400 |
| C  | -0.74438000 | -0.68917000 | -1.66022400 |
| H  | 0.71751100  | 2.66543500  | -1.38615500 |
| O  | 0.71308400  | 1.41563400  | -1.68611900 |
| O  | 0.26339000  | 3.18108000  | -0.36444500 |
| C  | -3.45081200 | -1.35821900 | -1.01016200 |
| H  | -4.42244700 | -1.79538300 | -1.25865200 |
| H  | -2.94377500 | -1.17576200 | -1.96364000 |
| C  | 3.75740500  | 0.50633500  | 0.40179700  |
| H  | 3.92163300  | -0.36248500 | 1.05171500  |
| H  | 4.73310600  | 0.99675400  | 0.32324200  |

**A12**

**E= -690.93775309 a.u.**

|    |             |             |             |
|----|-------------|-------------|-------------|
| Rh | -0.07360800 | -0.08468700 | -0.42765600 |
| P  | -2.19606500 | 0.98512500  | -0.58458700 |
| P  | -0.96535400 | -1.50942400 | 1.04613300  |
| C  | -3.65382600 | -0.08634600 | -0.20439800 |
| H  | -3.93048600 | 0.06686000  | 0.84544200  |
| H  | -4.49105400 | 0.28970900  | -0.80147100 |
| C  | -2.57561400 | -2.28441300 | 0.57699300  |
| H  | -2.34100900 | -3.29852300 | 0.23794300  |
| H  | -3.14824700 | -2.38323600 | 1.50677500  |
| P  | 2.01541100  | -1.11164200 | -0.90819800 |
| P  | 1.18893300  | 1.84502900  | 0.52731600  |
| C  | 3.35090800  | -1.02466100 | 0.36936200  |
| H  | 4.30035400  | -0.88309400 | -0.16023200 |
| H  | 3.40764800  | -2.01173500 | 0.84043100  |
| C  | 2.96664600  | 1.47133500  | 0.89684200  |

|   |             |             |             |
|---|-------------|-------------|-------------|
| H | 3.30388700  | 2.22023900  | 1.62060100  |
| H | 3.56413100  | 1.63207100  | -0.00705000 |
| C | 2.07333600  | -2.83887200 | -1.51404700 |
| H | 1.88340500  | -3.54786200 | -0.70713600 |
| H | 1.32499300  | -2.97887400 | -2.29727400 |
| C | 3.06386100  | -3.04922900 | -1.92743900 |
| H | -1.25228900 | -0.61933500 | 2.61891700  |
| H | -1.93286200 | 0.22202300  | 2.47671600  |
| H | -1.68737000 | -1.30763700 | 3.35020700  |
| H | -0.30412300 | -0.24640900 | 3.01069300  |
| C | 0.09512100  | -2.91398900 | 1.52525400  |
| H | 1.07338200  | -2.55922100 | 1.85828500  |
| H | -0.38302300 | -3.45117300 | 2.35046900  |
| H | 0.21217500  | -3.60081200 | 0.68586600  |
| C | 1.27410200  | 3.31720700  | -0.57062600 |
| H | 1.93303900  | 4.07655000  | -0.14002200 |
| H | 1.65907500  | 3.04070500  | -1.55555900 |
| H | 0.28208100  | 3.75532100  | -0.70251100 |
| C | 0.59971800  | 2.52107600  | 2.13194300  |
| H | -0.46751500 | 2.74171400  | 2.09974300  |
| H | 0.78424000  | 1.79740500  | 2.92942000  |
| H | 1.14321800  | 3.44003700  | 2.36911600  |
| C | -2.35708300 | 1.39363700  | -2.36631800 |
| H | -1.54345500 | 2.05225400  | -2.68149700 |
| H | -2.31921700 | 0.47972900  | -2.96365600 |
| H | -3.30776800 | 1.90218700  | -2.55079400 |
| C | -2.59851200 | 2.54888200  | 0.28217600  |
| H | -3.58479200 | 2.89926200  | -0.03630900 |
| H | -2.62353200 | 2.39532200  | 1.36377400  |
| H | -1.86691500 | 3.32488200  | 0.04886100  |
| C | 2.63055600  | -0.16387600 | -2.36143300 |
| H | 2.75995000  | 0.89427700  | -2.12588100 |
| H | 3.59336700  | -0.56677100 | -2.68920600 |
| H | 1.92007000  | -0.25487500 | -3.18758800 |
| H | -0.69651900 | -1.28120000 | -1.23070800 |
| C | -3.40969300 | -1.57044600 | -0.49243800 |
| H | -4.37269700 | -2.08401600 | -0.55827900 |
| H | -2.93301100 | -1.69488200 | -1.47168000 |
| C | 3.18235100  | 0.05307000  | 1.44878500  |
| H | 2.35604200  | -0.22052900 | 2.11933100  |
| H | 4.08285000  | 0.04452900  | 2.06912500  |

**A13**

**E= -1461.38937169 a.u.**

|    |             |             |             |
|----|-------------|-------------|-------------|
| Rh | 1.57165800  | 0.07556400  | -0.06984400 |
| P  | 1.36392800  | 2.24429000  | -1.06195800 |
| P  | 1.37437300  | 1.13474800  | 1.95297200  |
| C  | 0.62685900  | 3.54133600  | 0.01218600  |
| H  | 1.41004800  | 3.99415700  | 0.62944700  |
| H  | 0.27509900  | 4.32776800  | -0.66422800 |
| C  | -0.13228800 | 2.19860500  | 2.09511900  |
| H  | -0.95896000 | 1.52214200  | 2.34176300  |
| H  | 0.03318400  | 2.84830400  | 2.96251700  |
| P  | 1.25808600  | -2.24224900 | 0.422110900 |
| P  | 4.04695000  | -0.29547100 | 0.00222200  |
| C  | 2.45611900  | -3.33460800 | -0.47195500 |
| H  | 2.24981800  | -3.18875200 | -1.53630600 |
| H  | 2.16404500  | -4.36251300 | -0.22577200 |
| C  | 4.56183900  | -1.87744700 | -0.80805100 |
| H  | 5.65420400  | -1.93034400 | -0.73200400 |
| H  | 4.31837600  | -1.79831400 | -1.87107300 |
| C  | 1.29758200  | -2.92528300 | 2.12862000  |
| H  | 2.24552600  | -2.69368200 | 2.62029200  |
| H  | 0.48275100  | -2.50870300 | 2.72292500  |
| H  | 1.17885700  | -4.01215300 | 2.09164200  |
| C  | 2.76448700  | 2.28442500  | 2.35779500  |
| H  | 3.19777200  | 2.71700700  | 1.45411900  |
| H  | 2.41658400  | 3.08995300  | 3.01022800  |
| H  | 3.54652000  | 1.73732700  | 2.88660500  |
| C  | 1.26090900  | 0.17038600  | 3.51033800  |
| H  | 2.13426800  | -0.47445300 | 3.62462500  |
| H  | 1.21421000  | 0.85767400  | 4.36020900  |
| H  | 0.35931800  | -0.44442300 | 3.50766200  |
| C  | 5.25836100  | 0.89378900  | -0.70116200 |
| H  | 6.27737700  | 0.51718700  | -0.57041800 |
| H  | 5.04563500  | 1.02057600  | -1.76336600 |
| H  | 5.17676300  | 1.85911400  | -0.19532300 |
| C  | 4.77076700  | -0.56277900 | 1.68822900  |
| H  | 4.93822300  | 0.39522800  | 2.18325900  |
| H  | 4.10688300  | -1.16507400 | 2.31339600  |
| H  | 5.73622800  | -1.07248500 | 1.61273700  |
| C  | 0.14914300  | 2.15162800  | -2.43271000 |
| H  | 0.45671600  | 1.40688600  | -3.16605100 |
| H  | -0.82828600 | 1.86429700  | -2.03484300 |
| H  | 0.07727300  | 3.13020600  | -2.91596100 |
| C  | 2.81044300  | 3.08400800  | -1.78528000 |
| H  | 2.48608500  | 4.02437600  | -2.24078600 |
| H  | 3.54803400  | 3.30493000  | -1.01040100 |
| H  | 3.26021500  | 2.43705800  | -2.53958600 |
| C  | -0.31493100 | -2.87554000 | -0.26573800 |
| H  | -0.27827000 | -2.72170700 | -1.34628300 |
| H  | -0.41574400 | -3.94408700 | -0.05171800 |
| H  | -1.17754100 | -2.32843900 | 0.12336600  |



|   |             |             |             |
|---|-------------|-------------|-------------|
| H | 1.88355000  | -1.14059500 | -3.90348200 |
| H | 0.01409900  | 0.17701700  | -0.03781000 |
| C | 2.14675600  | -0.58714000 | -2.98342200 |
| O | 1.34789200  | -0.83010700 | -2.00599900 |
| O | 3.11811600  | 0.16821300  | -2.97659700 |
| C | -0.53402000 | 3.01511900  | 0.85917900  |
| H | -1.14823100 | 3.85738000  | 1.19303800  |
| H | -1.18621200 | 2.39025800  | 0.24021000  |
| C | 3.95048200  | -3.14474700 | -0.19916100 |
| H | 4.15560600  | -3.19313500 | 0.87798300  |
| H | 4.47261900  | -4.00425600 | -0.63243000 |
| P | -3.09368300 | 0.34232600  | 0.37156300  |
| N | -3.10036700 | -1.33713500 | 0.88980000  |
| N | -3.14811000 | 0.36086800  | -1.37164800 |
| C | -4.53804900 | 1.12950000  | 0.90736300  |
| N | -2.20508400 | -0.51319000 | -2.04926100 |
| H | -1.23612000 | -0.49955800 | -1.54294900 |
| C | -4.30473100 | 2.43873000  | 1.51082700  |
| H | -4.91025000 | 2.55513900  | 2.41835500  |
| C | -2.40114700 | -1.46858700 | 2.16438000  |
| H | -1.52924000 | -0.80637400 | 2.17365400  |
| C | -5.95062600 | 0.98064100  | 0.55401400  |
| H | -6.21941800 | 1.69950600  | -0.23623500 |
| H | -6.54395100 | 1.27238300  | 1.43156400  |
| C | -6.40195800 | -0.42286200 | 0.14273700  |
| H | -6.46564800 | -1.05248400 | 1.03387900  |
| H | -7.42985000 | -0.32928900 | -0.24809200 |
| C | -4.35654900 | 0.66415500  | -2.11797100 |
| H | -4.79959200 | 1.57164400  | -1.70169000 |
| H | -4.07346200 | 0.90516500  | -3.15037200 |
| C | -5.38481400 | -0.48726200 | -2.11412700 |
| H | -6.34993100 | -0.11493300 | -2.49127500 |
| H | -5.06209400 | -1.26917300 | -2.80986900 |
| C | -4.16442900 | -2.33307500 | 0.81327200  |
| H | -4.85117400 | -2.21537000 | 1.66894300  |
| C | -3.70855400 | -3.32734200 | 0.92919600  |
| C | -4.95649800 | -2.34011100 | -0.48714800 |
| H | -4.29106300 | -2.62683800 | -1.30634300 |
| H | -5.71700200 | -3.13675500 | -0.40076300 |
| N | -5.53182800 | -1.06031700 | -0.80477800 |
| H | -2.53536800 | -1.56211000 | -2.10530800 |
| H | -2.04499200 | -0.15231400 | -3.07169900 |
| H | -2.05114900 | -2.50173000 | 2.29322700  |
| H | -3.03587000 | -1.22251400 | 3.03071500  |
| H | -3.25376200 | 2.54376400  | 1.78849300  |
| H | -4.56320900 | 3.25992600  | 0.82409000  |

|   |             |             |             |
|---|-------------|-------------|-------------|
| H | 3.02435600  | 1.56651600  | -3.64042000 |
| C | 1.21301300  | -1.22252200 | 2.71906600  |
| H | 0.50031900  | -1.56171600 | 1.95987500  |
| H | 1.29613600  | -1.96713000 | 3.51749100  |
| H | 0.84793300  | -0.28290900 | 3.14201800  |
| H | -0.56429900 | -3.65150800 | -0.80595900 |
| H | -2.43158400 | -0.42678800 | -0.38708800 |
| C | -0.05919800 | -2.67479700 | -0.60615600 |
| O | -0.79067800 | -1.77736900 | -0.09360000 |
| O | 1.14600200  | -2.59951500 | -0.91066400 |
| C | -0.62445800 | 2.32501100  | -0.09430200 |
| H | -1.62718400 | 2.76859100  | -0.11153000 |
| H | -0.75966000 | 1.23722200  | -0.03242800 |
| C | 4.58618500  | -2.87730300 | 0.72388900  |
| H | 5.36843900  | -2.18098600 | 1.05701500  |
| H | 4.99610600  | -3.88038800 | 0.88297900  |
| P | -3.80398200 | -0.32998500 | -0.10973100 |
| N | -3.63799900 | -0.28057400 | 1.57056500  |
| N | -4.34444000 | -1.72362100 | -0.90822100 |
| C | -4.17563800 | 1.07093800  | -0.99563200 |
| N | -3.84742900 | -3.00396100 | -0.39659900 |
| C | -2.81081600 | -2.86979500 | -0.06910200 |
| H | -3.33652700 | 1.36275300  | -2.15590800 |
| C | -3.23659800 | 2.44716100  | -2.27206800 |
| H | -2.29831900 | -0.10385700 | 2.13672800  |
| C | -1.53733100 | -0.46726800 | 1.44227400  |
| H | -5.52813100 | 1.59280200  | -1.11545900 |
| H | -6.01945600 | 1.20221800  | -2.02008400 |
| H | -5.48639200 | 2.68238100  | -1.22085100 |
| C | -6.31913500 | 1.22569200  | 0.13000700  |
| H | -5.99400000 | 1.85353700  | 0.96314300  |
| H | -7.39388200 | 1.38421700  | -0.01605900 |
| C | -5.69125300 | -1.66737600 | -1.44387900 |
| H | -5.70522300 | -1.00019700 | -2.31237300 |
| H | -5.97715200 | -2.65915200 | -1.80152600 |
| C | -6.68763600 | -1.17376400 | -0.37632400 |
| H | -7.58963500 | -0.75915100 | -0.83817500 |
| H | -6.99572900 | -2.00717700 | 0.25812200  |
| C | -4.71664400 | 0.06622500  | 2.47737300  |
| H | -4.74636500 | 1.15353000  | 2.65027200  |
| H | -4.53737300 | -0.40500700 | 3.44913200  |
| C | -6.02195300 | -0.45213700 | 1.90118300  |
| H | -6.05967500 | -1.53556600 | 2.03206900  |
| H | -6.89371000 | -0.01250100 | 2.40066500  |
| H | -6.01429700 | -0.16934300 | 0.46204000  |
| N | -4.44948100 | -3.38450000 | 0.44076400  |
| H | -3.85808900 | -3.73890000 | -1.20557400 |
| H | -2.21943300 | -0.69790100 | 3.05270600  |
| H | -2.11400200 | 0.95023200  | 2.38469200  |
| H | -2.33959300 | 0.94130300  | -2.02212800 |
| H | -3.76510000 | 0.94741200  | -3.07823900 |

**A14**

**E= -1461.39692298 a.u.**

|    |             |             |             |
|----|-------------|-------------|-------------|
| Rh | 2.50770000  | 0.41671700  | 0.02981900  |
| P  | 1.41740900  | 1.38950100  | -1.79591400 |
| P  | 1.88901800  | 2.26415200  | 1.26426900  |
| C  | 0.12733200  | 2.67379600  | -1.38727900 |
| H  | 0.59282400  | 3.66247300  | -1.30628900 |
| H  | -0.55793400 | 2.72365400  | -2.24077200 |
| C  | 0.10603600  | 2.80051100  | 1.16426700  |
| H  | -0.38848900 | 2.39400500  | 2.05359600  |
| H  | 0.06314700  | 3.89416600  | 1.24788700  |
| P  | 2.82800700  | -0.97096000 | 1.87177400  |
| P  | 3.81005900  | -1.01647200 | -1.32977200 |
| C  | 3.31628000  | -2.72396900 | 1.56745700  |
| C  | 2.47482900  | -3.20056900 | 1.05372200  |
| H  | 3.43906700  | -3.20225000 | 2.54599900  |
| C  | 4.30711300  | -2.70957000 | -0.76897500 |
| H  | 5.18839200  | -2.99313300 | -1.35688600 |
| H  | 3.48052600  | -3.36694400 | -1.05739900 |
| C  | 3.98618200  | -0.54204600 | 3.24581400  |
| C  | 5.00097900  | -0.45403000 | 2.84878100  |
| H  | 3.72041100  | 0.41062100  | 3.70346100  |
| H  | 3.97247500  | -1.31800500 | 4.01742300  |
| C  | 2.81739100  | 3.74504900  | 0.65731500  |
| C  | 2.67446400  | 3.88321100  | -0.41570200 |
| H  | 2.50687700  | 4.65447500  | 1.18187500  |
| H  | 3.88347500  | 3.57722900  | 0.83019600  |
| C  | 2.16639300  | 2.50086400  | 3.07665900  |
| C  | 3.23863200  | 2.50306800  | 3.28688800  |
| H  | 1.75015500  | 3.46203700  | 3.39426200  |
| H  | 1.69435700  | 1.70617500  | 3.65867600  |
| C  | 3.38272200  | -1.46495200 | -3.06662900 |
| H  | 4.21559000  | -2.01101400 | -3.52036100 |
| H  | 2.50298400  | -2.11304400 | -3.03731900 |
| C  | 3.17342200  | -0.58608600 | -3.67913400 |
| C  | 5.44661600  | -0.18584400 | -1.54776500 |
| H  | 5.30278600  | 0.79729900  | -2.00344600 |
| H  | 5.91116200  | -0.03543000 | -0.56982300 |
| H  | 6.11669600  | -0.78039400 | -2.17716500 |
| C  | 0.33818800  | 0.16032600  | -2.63591700 |
| C  | 0.93022900  | -0.65218600 | -3.05138300 |
| H  | -0.31189800 | -0.29245300 | -1.87984600 |
| H  | -0.24619500 | 0.63519200  | -3.43158600 |
| C  | 2.29345500  | 2.23582000  | -3.18256600 |
| H  | 1.58875300  | 2.56894800  | -3.95089600 |
| H  | 2.83332100  | 3.10414300  | -2.79473600 |

**A7'**

**E= -881.14071614 a.u.**

|   |             |             |             |
|---|-------------|-------------|-------------|
| P | 1.33350400  | 1.82215000  | -0.43631700 |
| P | 1.59398600  | -1.13766700 | 1.11824800  |
| C | 3.10645500  | 1.34450300  | -0.62670200 |
| H | 3.14666300  | 0.62598700  | -1.45265900 |
| C | 3.65760700  | 2.24292600  | -0.92794900 |
| H | 3.38279800  | -0.75224100 | 0.81203500  |
| H | 3.95937000  | -1.17536400 | 1.64433800  |
| H | 3.63637900  | -1.30330800 | -0.09893600 |
| P | -1.59206900 | -1.72409000 | -0.03364600 |
| C | -1.85615400 | 1.48891100  | 0.50470500  |
| P | -3.31503700 | -1.46818900 | -0.72587800 |
| H | -4.00199200 | -2.07142400 | -0.11921000 |
| H | -3.31599000 | -1.89996200 | -1.73153700 |
| C | -3.57130100 | 0.77251700  | 0.49174000  |
| H | -4.29302000 | 1.59046900  | 0.59594500  |
| H | -3.69248100 | 0.13076100  | 1.37319600  |
| C | -1.02485100 | -3.09964700 | -1.11029400 |
| H | -0.90506300 | -2.69049100 | -2.11613400 |
| H | -0.04993500 | -3.46655200 | -0.79100500 |
| H | -1.75428000 | -3.91581400 | -1.11813300 |
| C | 1.75774800  | -2.97923700 | 1.12533100  |
| H | 2.01091700  | -3.28207100 | 0.10616200  |
| H | 2.55688300  | -3.28418000 | 1.80939200  |
| H | 0.83247800  | -3.47004000 | 1.43481000  |
| C | 1.46736800  | -0.79371100 | 2.93719700  |
| H | 0.47177400  | -1.07641100 | 3.29016100  |
| H | 2.22554300  | -1.33477800 | 3.51516100  |
| C | 1.58304300  | 0.28057500  | 3.10731300  |
| H | -1.78318500 | 2.15330400  | 2.23083500  |
| H | -2.63925900 | 2.79789300  | 2.46001100  |
| H | -1.76183600 | 1.31200300  | 2.92842200  |
| H | -0.85856700 | 2.71926600  | 2.36704300  |
| C | -2.20738000 | 3.05606000  | -0.42940000 |
| C | -1.34415400 | 3.72477600  | -0.39373700 |
| H | -2.40433500 | 2.81862100  | -1.47859100 |
| H | -3.07041100 | 3.58348200  | -0.00945500 |
| C | 1.48623500  | 3.28678800  | 0.68400500  |
| C | 0.52890000  | 3.80741200  | 0.76186400  |
| H | 1.77120400  | 2.95943300  | 1.68744100  |

|    |             |             |             |
|----|-------------|-------------|-------------|
| H  | 2.23716800  | 3.99073000  | 0.31072200  |
| C  | 1.00638000  | 2.59644300  | -2.07111000 |
| H  | 0.04803200  | 3.11855800  | -2.06190700 |
| H  | 1.79994400  | 3.30117800  | -2.33986100 |
| H  | 0.94928800  | 1.78208100  | -2.79831300 |
| C  | -2.00021400 | -2.56428700 | 1.56393700  |
| H  | -2.53481200 | -1.86068300 | 2.20849000  |
| H  | -2.62599000 | -3.44839300 | 1.40394000  |
| H  | -1.08793400 | -2.86368000 | 2.08331700  |
| H  | -1.43939700 | -0.43164000 | -3.33505300 |
| H  | -2.13184700 | -0.47857000 | -3.62420400 |
| O  | 0.59681400  | -0.49851800 | -2.43655600 |
| C  | 1.50707600  | -1.34604000 | -2.66866600 |
| H  | 1.68259300  | -1.56757100 | -3.74810400 |
| O  | 2.22086300  | -1.95090700 | -1.84412900 |
| Rh | -0.14145900 | 0.08250500  | 0.00775800  |
| C  | -3.81950700 | -0.02377200 | -0.79666800 |
| H  | -4.89160100 | -0.04377800 | -1.02233000 |
| H  | -3.33512100 | 0.48056200  | -1.64120200 |
| C  | 3.73672200  | 0.72380400  | 0.62725900  |
| H  | 4.82640800  | 0.80158300  | 0.53786000  |
| H  | 3.47320900  | 1.30173000  | 1.52434500  |

**A8'**

**E= -881.14103547 a.u.**

|    |             |             |             |
|----|-------------|-------------|-------------|
| P  | 1.36546200  | 1.41837200  | -1.28902700 |
| P  | 0.94498300  | 0.33488000  | 1.83838700  |
| C  | 3.11073300  | 1.44602200  | -0.65710800 |
| H  | 3.54941000  | 0.46879000  | -0.88964000 |
| H  | 3.66913200  | 2.19353600  | -1.23433400 |
| C  | 2.78513600  | 0.60531500  | 1.76338700  |
| H  | 3.13340300  | 0.79859600  | 2.78567800  |
| H  | 3.24735900  | -0.33651100 | 1.44508200  |
| P  | -1.22719900 | -1.99612800 | -0.00763000 |
| P  | -2.28486600 | 1.23376600  | 0.07963400  |
| C  | -2.72151200 | -2.13057100 | -1.12466300 |
| H  | -3.42510500 | -2.83170100 | -0.65680000 |
| H  | -2.36336000 | -2.60799700 | -2.04381800 |
| C  | -3.73420100 | 0.12108700  | -0.32809400 |
| H  | -4.60328700 | 0.75235400  | -0.55183600 |
| H  | -3.99000200 | -0.45054800 | 0.57333500  |
| C  | -0.45193000 | -3.63554200 | -0.38377600 |
| H  | 0.01637500  | -3.60277600 | -1.37024400 |
| H  | 0.32421700  | -3.85672200 | 0.35457900  |
| C  | -1.19657300 | -4.43888600 | -0.35917800 |
| H  | 0.90799100  | -0.97334800 | 3.14875900  |
| H  | 1.24024000  | -1.92763100 | 2.72980800  |
| H  | 1.55400200  | -0.71152200 | 3.99342500  |
| H  | -0.11548700 | -1.09403200 | 3.51249500  |
| C  | 0.45783700  | 1.79850800  | 2.86708600  |
| H  | -0.57122000 | 1.66301300  | 3.20928500  |
| H  | 1.11002000  | 1.92877600  | 3.73762500  |
| H  | 0.48829600  | 2.70274500  | 2.25299600  |
| C  | -2.95550800 | 1.99511300  | 1.63635900  |
| H  | -3.98074200 | 2.36020900  | 1.50397600  |
| H  | -2.94713800 | 1.25082600  | 2.43871900  |
| C  | -2.32024800 | 2.83135700  | 1.94197100  |
| H  | -2.62991300 | 2.62595600  | -1.09665900 |
| H  | -1.97501300 | 3.46749100  | -0.85429000 |
| H  | -2.39950100 | 2.29927700  | -2.11449200 |
| C  | -3.67209300 | 2.96220600  | -1.04894200 |
| H  | 1.00736000  | 3.23762800  | -1.34309400 |
| H  | 0.08211300  | 3.39441300  | -1.90303800 |
| H  | 0.85614700  | 3.61963000  | -0.32939600 |
| H  | 1.81554500  | 3.79828000  | -1.82562800 |
| C  | 1.67870500  | 1.10384100  | -3.07876000 |
| H  | 0.73132300  | 1.18516400  | -3.61742100 |
| H  | 2.39979100  | 1.81744100  | -3.49219300 |
| H  | 2.05781200  | 0.08673700  | -3.20280900 |
| C  | -1.96994800 | -2.41539900 | 1.64240400  |
| H  | -2.47210500 | -1.53814800 | 2.05897800  |
| H  | -2.68534100 | -3.24141100 | 1.56903400  |
| H  | -1.17296200 | -2.70778000 | 2.33057400  |
| H  | 1.42239900  | -1.31802300 | -1.14695700 |
| H  | -0.62537900 | -0.17620600 | -1.73144300 |
| O  | 2.18343000  | -1.88313500 | -1.50836000 |
| C  | 2.78915600  | -2.49755600 | -0.50732000 |
| H  | 2.31594100  | -2.30379700 | 0.47389900  |
| O  | 3.76070100  | -3.20426100 | -0.63054200 |
| Rh | -0.16287800 | 0.06805000  | -0.22073200 |
| C  | -3.44507600 | -0.82973500 | -1.50037900 |
| H  | -4.38953200 | -1.10092500 | -1.98652700 |
| H  | -2.85026300 | -0.30213900 | -2.25435400 |
| C  | 3.25390200  | 1.73886200  | 0.84147300  |
| H  | 4.31322800  | 1.92636600  | 1.05161400  |
| H  | 2.73296000  | 2.67202300  | 1.09626200  |

**TS<sub>A1-2</sub>**

**E= -691.84886007 a.u.**

|    |             |            |             |
|----|-------------|------------|-------------|
| Rh | 0.00555000  | 0.04594800 | -0.63855000 |
| P  | -2.19740100 | 0.84089100 | -0.70299800 |

|   |             |             |             |
|---|-------------|-------------|-------------|
| P | -0.73158000 | -1.83916000 | 0.65618900  |
| C | -3.28540000 | 0.52016100  | 0.75487400  |
| H | -2.89133300 | 1.10324000  | 1.59534300  |
| H | -4.27291900 | 0.93228500  | 0.51752600  |
| C | -2.16302100 | -1.55536400 | 1.80110700  |
| H | -2.41369300 | -2.51816800 | 2.26137200  |
| H | -1.80366800 | -0.90151400 | 2.60545600  |
| P | 2.19672100  | -0.73153900 | -0.83866100 |
| P | 0.84250000  | 1.85344500  | 0.70556200  |
| C | 3.24765800  | -0.77487900 | 0.69586100  |
| H | 4.27523700  | -0.54244000 | 0.39192000  |
| H | 3.25842100  | -1.80842700 | 1.05692200  |
| C | 2.55309100  | 1.60418400  | 1.39652200  |
| H | 2.67287700  | 2.29182400  | 2.24046200  |
| C | 3.28385400  | 1.91626400  | 0.64121900  |
| C | 2.41745100  | -2.42026100 | -1.53015200 |
| H | 1.94539600  | -3.16303800 | -0.88314400 |
| H | 1.93859000  | -2.46762400 | -2.51122400 |
| H | 3.47893200  | -2.66341800 | -1.63433600 |
| C | 0.39986400  | -2.71458500 | 1.82517800  |
| H | 0.72157100  | -2.03294100 | 2.61590800  |
| H | -0.10713500 | -3.56913300 | 2.28336900  |
| H | 1.28688800  | -3.08172700 | 1.30473500  |
| C | -1.33644100 | -3.25557600 | -0.35981500 |
| H | -0.52223100 | -3.61644500 | -0.99329800 |
| H | -1.70265100 | -4.07818400 | 0.26240900  |
| H | -2.13752500 | -2.91984000 | -1.02223900 |
| C | 1.04231200  | 3.50989000  | -0.07924400 |
| H | 1.52100700  | 4.21776200  | 0.60470000  |
| H | 1.65379800  | 3.40715700  | -0.97921600 |
| C | 0.07269400  | 3.91098400  | -0.37995000 |
| H | -0.08833000 | 2.27202900  | 2.24507800  |
| H | -1.11885000 | 2.54294800  | 2.00165900  |
| H | -0.11634200 | 1.39759800  | 2.90131500  |
| H | 0.37366200  | 3.10724600  | 2.78026600  |
| C | -3.15913800 | 0.13378200  | -2.10052900 |
| H | -2.67275800 | 0.41031600  | -3.03903000 |
| H | -3.16772200 | -0.95628800 | -2.03756000 |
| H | -4.18778100 | 0.50619000  | -2.10195300 |
| C | -2.44113700 | 2.64548400  | -0.95647700 |
| H | -3.49721000 | 2.87135500  | -1.12978700 |
| H | -2.10617900 | 3.20088600  | -0.07723200 |
| H | -1.85597400 | 2.97107700  | -1.81980900 |
| C | 3.18675800  | 0.27685200  | -2.01567100 |
| H | 3.22706000  | 1.31534900  | -1.67999000 |
| H | 4.20485300  | -0.11173000 | -2.11211400 |
| H | 2.69803000  | 0.25795400  | -2.99269200 |
| H | 0.11739300  | 0.55503900  | -2.21912800 |
| C | -0.20378000 | -0.42435300 | -2.22249100 |
| C | 2.81575200  | 0.15792000  | 1.83475900  |
| H | 3.59976100  | 0.14319400  | 2.59805600  |
| H | 1.91624100  | -0.24489100 | 2.31339200  |
| C | -3.42139700 | -0.95066900 | 1.16787300  |
| H | -4.23125700 | -1.01652700 | 1.90144400  |
| H | -3.74872800 | -1.55800300 | 0.31490700  |

**TS<sub>A3-4</sub>**

**E= -1272.81021989 a.u.**

|    |             |             |             |
|----|-------------|-------------|-------------|
| Rh | 1.33483200  | 0.07024100  | -0.23533700 |
| P  | 1.53144500  | 2.29529400  | -0.85560900 |
| P  | 1.52930300  | 0.64922200  | 2.04398500  |
| C  | 0.70028500  | 3.59735800  | 0.20926100  |
| H  | 1.45094200  | 4.34845600  | 0.48158700  |
| H  | -0.04250800 | 4.11796800  | -0.40343500 |
| C  | 1.03041500  | 2.40500600  | 2.45900100  |
| H  | 0.61734300  | 2.40386500  | 3.47393500  |
| H  | 1.94736500  | 3.00613600  | 2.50313600  |
| P  | 0.84089500  | -2.21476900 | 0.01873800  |
| P  | 3.67495700  | -0.62561800 | -0.89760900 |
| C  | 2.12317500  | -3.24817000 | 0.91076100  |
| H  | 1.99231700  | -4.27604900 | 0.54898100  |
| H  | 1.82822300  | -3.25746700 | 1.96693200  |
| C  | 4.04774800  | -2.42751500 | -0.60114100 |
| H  | 5.12422000  | -2.58654400 | -0.72884700 |
| C  | 3.55231200  | -3.03700100 | -1.36416700 |
| H  | -0.64200900 | -2.93313400 | 0.85515900  |
| H  | -0.80939400 | -2.46924800 | 1.82807200  |
| H  | -1.50588600 | -2.73994800 | 0.21991000  |
| H  | -0.51892100 | -4.01409900 | 0.97964700  |
| C  | 3.16090500  | 0.61074700  | 2.91640300  |
| C  | 3.88650300  | 1.20412300  | 2.35342300  |
| H  | 3.08257100  | 1.01342700  | 3.93165100  |
| H  | 3.53063600  | -0.41628000 | 2.97554400  |
| C  | 0.51632700  | -0.33269100 | 3.23860100  |
| H  | 0.90245900  | -1.35645000 | 3.26230900  |
| H  | 0.55852800  | 0.08067200  | 4.25128600  |
| H  | -0.51869800 | -0.37301000 | 2.89304600  |
| C  | 4.03719400  | -0.48817400 | -2.70499300 |
| H  | 4.99417000  | -0.94786300 | -2.97268700 |
| H  | 3.23051800  | -0.97159800 | -3.26245800 |
| H  | 4.05878000  | 0.56461400  | -3.00110100 |
| C  | 5.23950900  | 0.07007500  | -0.17629200 |
| H  | 5.27633400  | 1.15506800  | -0.28642100 |

|   |             |             |             |
|---|-------------|-------------|-------------|
| H | 5.28184100  | -0.16244300 | 0.89145600  |
| H | 6.12244700  | -0.36052900 | -0.66076400 |
| C | 1.03699700  | 2.76631500  | -2.57054000 |
| H | 1.64888300  | 2.18258700  | -3.26343300 |
| H | -0.00695600 | 2.50852100  | -2.75559400 |
| C | 1.19086600  | 3.83315700  | -2.76063200 |
| H | 3.25308800  | 2.97167600  | -0.85625800 |
| H | 3.25849400  | 4.03522400  | -1.11418100 |
| H | 3.69766200  | 2.84296100  | 0.13438000  |
| C | 3.86467300  | 2.43361700  | -1.58385100 |
| H | 0.68649300  | -3.09249900 | -1.59973300 |
| H | 1.50590900  | -2.81935200 | -2.26607500 |
| H | 0.65782200  | -4.17943600 | -1.47206000 |
| H | -0.24397600 | -2.75972500 | -2.06497000 |
| H | 0.88128200  | -0.17104300 | -1.75385800 |
| H | -0.77315700 | 0.33216000  | -0.14148300 |
| P | -2.40724800 | 0.12478200  | -0.13365200 |
| N | -3.21371900 | 1.57145000  | -0.57179100 |
| N | -2.80536600 | -0.42095700 | 1.44035600  |
| N | -2.58711300 | -1.13083300 | -1.28018400 |
| C | -2.89502400 | 0.66942000  | 2.41452800  |
| C | -2.09709400 | 1.39595700  | 2.25385200  |
| H | -2.04640500 | -0.66246000 | -2.56717900 |
| C | -2.75348800 | -0.02175900 | -3.11426000 |
| H | -2.35712600 | 2.60418900  | -1.14442100 |
| C | -1.31313100 | 2.35579600  | -0.96540800 |
| C | -3.73566700 | -2.03281900 | -1.41079000 |
| H | -3.66016000 | -2.83370200 | -0.67007800 |
| H | -3.66254700 | -2.52042300 | -2.38703400 |
| C | -5.09217100 | -1.32845700 | -1.28195700 |
| H | -5.25728400 | -0.69717300 | -2.16007100 |
| H | -5.89574500 | -2.08159700 | -1.26920600 |
| C | -3.76348600 | -1.49321300 | 1.68788700  |
| H | -3.39170300 | -2.40999400 | 1.23047100  |
| H | -3.78175500 | -1.68071600 | 2.76640300  |
| C | -5.18239900 | -1.15683900 | 1.17995500  |
| H | -5.78154900 | -2.07709900 | 1.12722600  |
| H | -5.68292900 | -0.49637100 | 1.89372700  |
| C | -4.59609200 | 1.70149800  | -1.03488800 |
| C | -4.65513400 | 1.44641800  | -2.10591000 |
| H | -4.88282200 | 2.75673300  | -0.95309200 |
| C | -5.57938000 | 0.86415800  | -0.23028700 |
| H | -5.66655200 | 1.29077500  | 0.77243800  |
| H | -6.57291100 | 0.93144800  | -0.70147400 |
| N | -5.10387000 | -0.49509200 | -0.10161800 |
| H | -3.85063300 | 1.20899200  | 2.36847900  |
| H | -2.77257900 | 0.25401500  | 3.41906600  |
| H | -2.56616800 | 3.57838100  | -0.68667700 |
| H | -2.50510500 | 2.69106500  | -2.23025500 |
| H | -1.10944100 | -0.12061500 | -2.40102200 |
| H | -1.80924900 | -1.52598000 | -3.19465500 |
| C | 0.04278700  | 3.05322500  | 1.47970900  |
| H | -0.47273900 | 3.87917900  | 1.98339000  |
| C | 0.72516300  | 2.32688800  | 1.19611100  |
| H | 3.59822300  | -2.84546800 | 0.80615200  |
| H | 4.20509500  | -3.68833200 | 1.15358000  |
| H | 3.79961300  | -2.02619200 | 1.50654600  |

**TS<sub>A8-9</sub>**

**E= -879.93960211 a.u.**

|    |             |             |             |
|----|-------------|-------------|-------------|
| Rh | 0.08460100  | -0.01829900 | -0.27508600 |
| P  | 1.77759700  | 1.60204500  | -0.23860700 |
| P  | 1.55945600  | -1.91509700 | 0.03688900  |
| C  | 3.42372800  | 0.95998300  | -0.82989400 |
| H  | 3.32697700  | 0.81378500  | -1.91265300 |
| H  | 4.15819800  | 1.76153900  | -0.67987600 |
| C  | 3.24737900  | -1.60872300 | -0.68260400 |
| H  | 3.87747800  | -2.48215200 | -0.46916600 |
| C  | 3.12333100  | -1.55635700 | -1.77112100 |
| H  | -1.01477500 | 0.12052600  | 1.82369700  |
| P  | -1.86320100 | -0.78729600 | -1.26832800 |
| C  | -2.83220800 | 0.52164600  | 1.77825300  |
| H  | -2.91959000 | 1.56364000  | 1.45501600  |
| H  | -3.20271700 | 0.47052500  | 2.80990700  |
| C  | -3.49715900 | -0.17941300 | -0.62267600 |
| H  | -4.29314900 | -0.70053600 | -1.17011500 |
| H  | -3.57869700 | 0.88374200  | -0.87495300 |
| C  | -1.06767100 | -1.42002800 | 2.85526300  |
| H  | -1.34373900 | -2.27746300 | 2.23519900  |
| H  | -0.07384100 | -1.60664600 | 3.26882400  |
| C  | -1.78061400 | -1.32878600 | 3.68201000  |
| C  | 1.20700900  | -3.52782000 | -0.81006000 |
| H  | 1.00052200  | -3.33736900 | -1.86707100 |
| H  | 2.05112900  | -4.22276800 | -0.73024900 |
| C  | 0.32321800  | -3.99360800 | -0.36622300 |
| H  | 2.06585300  | -2.58349400 | 1.69775200  |
| C  | 1.21208900  | -3.08225100 | 2.16372100  |
| H  | 2.88693800  | -3.30494700 | 1.61274500  |
| H  | 2.37646900  | -1.76349700 | 2.35167100  |
| C  | -2.06549400 | -0.49569400 | -3.07519300 |
| H  | -3.02067200 | -0.88535100 | -3.44382400 |
| H  | -1.99469100 | 0.57582600  | -3.26646800 |
| H  | -1.24217000 | -0.99220400 | -3.59556100 |
| C  | -2.18893200 | -2.61453700 | -1.21341900 |
| H  | -1.41764100 | -3.13041700 | -1.78979600 |
| H  | -2.13928100 | -2.97933600 | -0.18353700 |
| H  | -3.16912200 | -2.86107500 | -1.63656900 |
| C  | 2.29339600  | 2.40491000  | 1.34714300  |
| H  | 1.45724100  | 2.99043600  | 1.73541100  |
| H  | 2.55190300  | 1.64133700  | 2.08567300  |
| H  | 3.15333100  | 3.06671100  | 1.19746300  |
| C  | 1.71621500  | 3.10429500  | -1.32489500 |
| H  | 2.69956100  | 3.58461700  | -1.38312400 |
| H  | 1.39007300  | 2.81224500  | -2.32542500 |
| H  | 0.99936400  | 3.82543800  | -0.92510000 |
| C  | -0.49282700 | 1.33361200  | 3.11549300  |
| H  | -0.58195400 | 2.34080500  | 2.70318800  |
| H  | -1.11745800 | 1.25171800  | 4.01136100  |
| H  | 0.54973100  | 1.15418000  | 3.38934500  |
| H  | 0.62256600  | -0.02264900 | -1.77931600 |
| O  | -1.25235400 | 2.48403300  | -0.78179500 |
| O  | -1.26943900 | 2.97974400  | 0.30032700  |
| O  | -1.47045500 | 2.46681300  | -1.94645800 |
| O  | 3.93590200  | -0.33198200 | -0.18362200 |
| C  | -3.69849700 | -0.37701000 | 0.88598300  |
| H  | -3.54510000 | -1.43270100 | 1.14894900  |
| H  | -4.74960100 | -0.16769500 | 1.11742500  |
| H  | 3.86235600  | -0.26265200 | 0.91086300  |
| H  | 5.00745900  | -0.41642500 | -0.40017000 |

**TS<sub>A9-7</sub>**

**E= -879.92840207 a.u.**

**TS<sub>A6-7</sub>**

**E= -879.92973130 a.u.**

|    |             |             |             |
|----|-------------|-------------|-------------|
| Rh | 0.06568600  | 0.07122700  | -0.16321700 |
| P  | -1.92415000 | -0.70722500 | -1.04360000 |
| P  | -0.83887000 | 0.08387000  | 2.07738500  |
| C  | -3.42577400 | 0.04498500  | -0.26139800 |
| H  | -3.37237200 | 1.11886400  | -0.46517700 |
| H  | -4.30581300 | -0.34599800 | -0.78764300 |
| C  | -2.62917100 | 0.59424200  | 2.15082500  |
| C  | -2.97545500 | 0.52794000  | 3.19116300  |
| H  | -2.66005400 | 1.65241600  | 1.86335300  |
| P  | 1.27809900  | -1.83291600 | -0.65306500 |
| P  | 2.02354400  | 1.27813500  | 0.01682500  |
| C  | 3.10931500  | -1.75208600 | -0.31696500 |
| H  | 3.59772700  | -1.22930900 | -1.14841200 |
| H  | 3.50101800  | -2.77592300 | -0.31560800 |
| C  | 3.47059800  | 0.48051800  | 0.89728300  |
| C  | 3.51664000  | 0.91838800  | 1.90080100  |
| H  | 4.39041100  | 0.78195500  | 0.38021900  |
| C  | 0.89695500  | -3.39115700 | 0.28485000  |
| H  | 1.07618800  | -3.21511800 | 1.34908500  |
| H  | -0.15507100 | -3.65559900 | 0.16512100  |
| H  | 1.51652000  | -4.23028100 | -0.05070600 |
| C  | -0.18811900 | 1.19495900  | 3.41306900  |
| H  | -0.28687800 | 2.23503000  | 3.08958700  |
| H  | -0.72634000 | 1.06589100  | 4.35951500  |
| H  | 0.87354600  | 0.98646900  | 3.57761200  |
| C  | -0.91334800 | -1.50777300 | 3.03421500  |
| H  | 0.10783400  | -1.83423700 | 3.25381200  |
| H  | -1.46472200 | -1.40841900 | 3.97693300  |
| H  | -1.38203500 | -2.28406800 | 2.42262100  |
| C  | 2.78064500  | 1.77874700  | -1.59191000 |
| H  | 3.70671700  | 2.34650100  | -1.44587700 |
| H  | 2.98929600  | 0.88845400  | -2.19060700 |
| H  | 2.05367600  | 2.39311400  | -2.12721700 |

|                               |             |             |             |   |             |             |             |
|-------------------------------|-------------|-------------|-------------|---|-------------|-------------|-------------|
| P                             | -1.17946200 | 2.01723900  | -0.03074300 | H | -2.19102600 | -2.87913200 | 0.55042000  |
| P                             | -2.05295800 | -1.21673800 | -0.22371800 | H | -0.80370400 | -3.34553800 | 1.50412400  |
| P                             | 2.11076100  | 0.78840700  | -0.83689500 | C | -0.36562500 | -0.88376200 | 3.27151500  |
| P                             | 0.84226200  | -0.72797200 | 1.80108700  | H | 0.60789400  | -1.37668000 | 3.25508500  |
| C                             | -1.85342300 | 2.81335800  | -1.56244900 | H | -0.23487500 | 0.14446700  | 3.61301800  |
| C                             | -2.95107100 | -1.23159900 | -1.82940000 | H | -1.00599900 | -1.40893500 | 3.98607500  |
| C                             | 2.44471600  | 1.06851600  | -2.62183500 | C | 2.91160900  | -1.81361200 | -1.57882800 |
| C                             | 0.04664700  | -2.04761500 | 2.82438600  | H | 2.41827400  | -2.77972400 | -1.66663100 |
| C                             | -2.15257500 | -2.98722100 | 0.28354700  | H | 2.68287600  | -1.22069700 | -2.46628700 |
| C                             | -0.43438900 | 3.51884800  | 0.77441100  | C | 3.99407100  | -1.94796100 | -1.49879100 |
| C                             | 0.98342900  | 0.59838100  | 3.09217700  | C | 2.57743500  | -2.14639200 | 1.30075200  |
| C                             | 2.61651300  | 2.44207800  | -0.17049000 | H | 3.56917800  | -2.59476900 | 1.19070500  |
| H                             | -0.04979500 | -0.44079000 | -1.94091200 | H | 2.53916900  | -1.62475400 | 2.26020700  |
| H                             | -0.99720300 | -1.78893000 | 3.02374600  | H | 1.81977300  | -2.92920000 | 1.25838700  |
| H                             | 0.07110600  | -2.99313200 | 2.27739100  | C | -3.13755700 | -0.59747100 | -1.67468700 |
| H                             | 0.56726700  | -2.17386500 | 3.77970600  | H | -3.37387100 | -1.24685600 | -0.83015700 |
| H                             | 1.46937200  | 0.23968800  | 4.00650400  | H | -4.06151400 | -0.16013300 | -2.06418200 |
| H                             | 1.55249900  | 1.44314400  | 2.69543900  | H | -2.67396200 | -1.23382400 | -2.43154100 |
| H                             | -0.01981500 | 0.96002700  | 3.33795800  | H | -0.22377600 | -1.50043300 | -2.04232700 |
| H                             | 2.39021200  | 2.54168900  | 0.89286400  | H | 0.74874000  | 0.53776200  | -1.72885300 |
| H                             | 2.08451100  | 3.22850000  | -0.71014400 | C | -0.45254300 | -2.51038500 | -1.51129200 |
| H                             | 3.69048400  | 2.59249100  | -0.32143500 | O | -1.45366700 | -3.09684300 | -1.90006500 |
| H                             | 2.34980800  | 0.11390900  | -3.13965800 | O | 0.37404500  | -2.78939000 | -0.59905700 |
| H                             | 3.44729100  | 1.48332900  | -2.76947100 | C | 3.54088500  | 1.41253700  | -0.84458400 |
| H                             | 1.69912100  | 1.76680400  | -3.01144100 | H | 4.51574700  | 1.89413000  | -0.96282100 |
| H                             | -2.34793800 | -1.81743900 | -2.52510500 | C | 3.29027000  | 0.99739500  | -1.82646800 |
| H                             | -3.04682600 | -0.21585200 | -2.21855600 | H | -2.76404300 | 1.41884800  | 1.54277300  |
| H                             | -3.94413400 | -1.68025600 | -1.72018100 | H | -1.81165000 | 1.87286300  | 1.84206900  |
| H                             | -1.01968100 | 3.05838200  | -2.22644900 | H | -3.53355900 | 1.93103900  | 2.12888300  |
| H                             | -2.49135500 | 2.10322600  | -2.09452300 |   |             |             |             |
| H                             | -2.42360900 | 3.72433000  | -1.34615800 |   |             |             |             |
| H                             | -1.20242400 | 4.27422400  | 0.97496000  |   |             |             |             |
| H                             | 0.04369900  | 3.24035300  | 1.71753700  |   |             |             |             |
| H                             | 0.32105200  | 3.96518700  | 0.12668800  |   |             |             |             |
| H                             | -2.04874700 | -3.07394600 | 1.36663700  |   |             |             |             |
| H                             | -3.12502000 | -3.39784400 | -0.00718700 |   |             |             |             |
| H                             | -1.36040000 | -3.54180200 | -0.21853700 |   |             |             |             |
| O                             | 0.63970600  | -1.95397700 | -1.90510800 |   |             |             |             |
| C                             | 1.82904600  | -1.88902800 | -2.16518700 |   |             |             |             |
| O                             | -0.26399300 | -2.76187700 | -2.03134100 |   |             |             |             |
| C                             | -2.71908400 | 1.97063800  | 1.02063600  |   |             |             |             |
| H                             | -2.38576500 | 1.80376300  | 2.05345200  |   |             |             |             |
| C                             | -3.17631100 | 2.96801900  | 0.99068400  |   |             |             |             |
| H                             | -3.34631100 | -0.52439000 | 0.91658600  |   |             |             |             |
| H                             | 4.22102500  | -1.18280800 | 0.84740400  |   |             |             |             |
| H                             | -2.96131900 | -0.61359200 | 1.94082400  |   |             |             |             |
| C                             | 2.58007000  | -1.38707600 | 1.80056100  |   |             |             |             |
| C                             | 2.55372300  | -2.31765900 | 1.22135300  |   |             |             |             |
| C                             | 2.84447100  | -1.64558100 | 2.83427100  |   |             |             |             |
| C                             | 3.55810500  | -0.22833300 | -0.29496700 |   |             |             |             |
| H                             | 4.46489900  | 0.27678500  | -0.64980300 |   |             |             |             |
| C                             | 3.47313000  | -1.18210100 | -0.82094300 |   |             |             |             |
| Rh                            | 0.00356300  | -0.09587800 | -0.32493100 |   |             |             |             |
| C                             | -3.76941200 | 0.92193800  | 0.64775600  |   |             |             |             |
| H                             | -4.67647500 | 1.12890700  | 1.22802100  |   |             |             |             |
| H                             | -4.06004000 | 1.03961400  | -0.40401300 |   |             |             |             |
| C                             | 3.65163000  | -0.45392300 | 1.21967200  |   |             |             |             |
| H                             | 4.62980300  | -0.90209200 | 1.42883900  |   |             |             |             |
| H                             | 3.64829600  | 0.50531900  | 1.75549100  |   |             |             |             |
| <b>TS<sub>A13-14</sub></b>    |             |             |             |   |             |             |             |
| <b>E= -1461.35313747 a.u.</b> |             |             |             |   |             |             |             |
| Rh                            | 0.95212900  | 0.02015700  | 0.00205000  |   |             |             |             |
| P                             | 0.70808300  | 2.13499600  | -0.98194000 |   |             |             |             |
| P                             | 1.11123600  | 0.88970300  | 2.12802600  |   |             |             |             |
| C                             | 0.68497600  | 3.60959500  | 0.12254600  |   |             |             |             |
| H                             | 1.71146100  | 3.82111000  | 0.44500700  |   |             |             |             |
| H                             | 0.35085800  | 4.47055200  | -0.46661700 |   |             |             |             |
| C                             | 0.43711400  | 2.60918100  | 2.46894000  |   |             |             |             |
| H                             | -0.27212000 | 2.51170900  | 3.29736200  |   |             |             |             |
| H                             | 1.27710000  | 3.19908900  | 2.85398100  |   |             |             |             |
| P                             | 1.35619500  | -2.29514400 | 0.48642500  |   |             |             |             |
| P                             | 4.38951500  | 0.33455800  | -0.42603700 |   |             |             |             |
| C                             | 2.90510300  | -2.95203200 | -0.28277300 |   |             |             |             |
| H                             | 2.83296800  | -2.73828200 | -1.35294200 |   |             |             |             |
| H                             | 2.83797600  | -4.04032700 | -0.16673900 |   |             |             |             |
| C                             | 4.94999600  | -1.42813700 | -0.64965200 |   |             |             |             |
| H                             | 6.03411700  | -1.46063200 | -0.48826500 |   |             |             |             |
| H                             | 4.77058800  | -1.68752400 | -1.69700100 |   |             |             |             |
| C                             | 1.46874800  | -3.02841900 | 2.17722000  |   |             |             |             |
| H                             | 2.24566100  | -2.53021200 | 2.76308400  |   |             |             |             |
| H                             | 0.51632500  | -2.93935600 | 2.70439500  |   |             |             |             |
| H                             | 1.72286800  | -4.08977200 | 2.10007700  |   |             |             |             |
| C                             | 2.83165400  | 1.05096600  | 2.75244200  |   |             |             |             |
| H                             | 3.39090900  | 1.73191500  | 2.10949500  |   |             |             |             |
| H                             | 2.83947100  | 1.42462200  | 3.78084700  |   |             |             |             |
| C                             | 3.32329300  | 0.07589500  | 2.71557100  |   |             |             |             |
| H                             | 0.35810800  | -0.03394600 | 3.53966500  |   |             |             |             |
| H                             | 0.87425100  | -0.98267300 | 3.68426500  |   |             |             |             |
| H                             | 0.45559400  | 0.55217700  | 4.45809000  |   |             |             |             |
| C                             | -0.69838500 | -0.24069400 | 3.36477800  |   |             |             |             |
| C                             | 5.16259900  | 1.07661700  | -1.93863700 |   |             |             |             |
| H                             | 6.18060700  | 0.69827100  | -2.08071100 |   |             |             |             |
| H                             | 4.55836300  | 0.81483300  | -2.80934500 |   |             |             |             |
| H                             | 5.21416500  | 2.16559200  | -1.84569400 |   |             |             |             |
| C                             | 5.66679900  | 0.87627300  | 0.82367800  |   |             |             |             |
| H                             | 5.55797100  | 1.94391200  | 1.04068300  |   |             |             |             |
| H                             | 5.54537700  | 0.33027200  | 1.76410200  |   |             |             |             |
| H                             | 6.68372200  | 0.70465000  | 0.45491100  |   |             |             |             |
| C                             | -0.84187400 | 2.32776700  | -1.94304600 |   |             |             |             |
| H                             | -0.96678000 | 1.45289400  | -2.58403000 |   |             |             |             |
| H                             | -1.69188200 | 2.36978900  | -1.25701300 |   |             |             |             |
| P                             | -0.80763400 | 3.24155100  | -2.54351400 |   |             |             |             |
| C                             | 2.01043700  | 2.56328800  | -2.19557600 |   |             |             |             |
| H                             | 1.74276400  | 3.48384900  | -2.72282300 |   |             |             |             |
| H                             | 2.95342200  | 2.70961200  | -1.66727300 |   |             |             |             |
| C                             | 2.14874600  | 1.74915500  | -2.90881100 |   |             |             |             |
| C                             | 0.13235000  | -3.41308100 | -0.31744800 |   |             |             |             |
| H                             | 0.20945700  | -3.27872100 | -1.39821800 |   |             |             |             |
| H                             | 0.34858900  | -4.45652600 | -0.06988100 |   |             |             |             |
| H                             | -0.88875400 | -3.17555200 | -0.01579800 |   |             |             |             |
| H                             | 1.02156000  | -1.26686800 | -3.83977400 |   |             |             |             |
| H                             | -0.70064800 | -0.11258300 | 0.18004900  |   |             |             |             |
| C                             | 1.46542100  | -0.89713500 | -2.89442300 |   |             |             |             |
| O                             | 0.58670500  | -0.70517200 | -1.97601800 |   |             |             |             |
| O                             | 2.67973600  | -0.72082000 | -2.81971300 |   |             |             |             |
| C                             | -0.23065100 | 3.38393100  | 1.32965800  |   |             |             |             |
| H                             | -0.54637600 | 4.35223300  | 1.73273800  |   |             |             |             |
| H                             | -1.14583300 | 2.87527200  | 1.00607200  |   |             |             |             |
| C                             | 4.25466800  | -2.44488400 | 0.26554000  |   |             |             |             |
| H                             | 4.14214900  | -2.03167300 | 1.27831000  |   |             |             |             |
| H                             | 4.91416100  | -3.31064500 | 0.38139800  |   |             |             |             |
| P                             | -2.55972400 | -0.20005800 | -0.00968600 |   |             |             |             |
| <b>TS<sub>A10-11</sub></b>    |             |             |             |   |             |             |             |
| <b>E= -880.33684672 a.u.</b>  |             |             |             |   |             |             |             |
| Rh                            | 0.12110300  | -0.01480700 | -0.40278800 |   |             |             |             |
| P                             | 2.28813200  | -0.97071000 | -0.06976100 |   |             |             |             |
| P                             | 0.92980700  | 1.96607700  | 0.30118700  |   |             |             |             |
| C                             | 3.63802400  | 0.28105400  | 0.18514900  |   |             |             |             |
| H                             | 3.61701100  | 0.67440600  | 1.20751300  |   |             |             |             |
| C                             | 4.59026500  | -0.24877900 | 0.08125000  |   |             |             |             |
| C                             | 2.52089200  | 2.49661900  | -0.48295800 |   |             |             |             |
| H                             | 2.24079200  | 3.05523900  | -1.38191700 |   |             |             |             |
| H                             | 2.96006600  | 3.21870400  | 0.21584200  |   |             |             |             |
| P                             | -2.01529100 | 0.75861600  | -1.16658000 |   |             |             |             |
| P                             | -1.13389400 | -0.94216500 | 1.59519200  |   |             |             |             |
| C                             | -3.04019200 | 1.70840900  | 0.06004000  |   |             |             |             |
| H                             | -4.08772800 | 1.47992000  | -0.16804300 |   |             |             |             |
| H                             | -2.91023200 | 2.77573900  | -0.14468900 |   |             |             |             |
| C                             | -2.75312500 | -0.07013100 | 1.91283200  |   |             |             |             |
| C                             | -2.98173800 | -0.19701300 | 2.97606100  |   |             |             |             |
| H                             | -3.54132400 | -0.60317100 | 1.37004000  |   |             |             |             |
| C                             | -2.00987300 | 1.81378600  | -2.66741800 |   |             |             |             |
| H                             | -1.41469900 | 2.71593200  | -2.52203000 |   |             |             |             |
| H                             | -1.57263600 | 1.24109700  | -3.48893700 |   |             |             |             |
| H                             | -3.03102400 | 2.09951600  | -2.93588400 |   |             |             |             |
| C                             | 1.25119600  | 2.01638000  | 2.11055800  |   |             |             |             |
| C                             | 1.75219600  | 1.10808300  | 2.44763700  |   |             |             |             |
| H                             | 1.86886100  | 2.88452100  | 2.35782400  |   |             |             |             |
| O                             | 0.30154100  | 2.10612600  | 2.64266100  |   |             |             |             |
| C                             | -0.05088200 | 3.49815400  | 0.06325100  |   |             |             |             |
| H                             | -0.97681100 | 3.47337000  | 0.63670400  |   |             |             |             |
| H                             | 0.54877500  | 4.34508900  | 0.41009100  |   |             |             |             |
| H                             | -0.27814800 | 3.64691800  | -0.99297500 |   |             |             |             |
| C                             | -1.67668500 | -2.69179800 | 1.49594800  |   |             |             |             |
| H                             | -2.33826300 | -2.91926700 | 2.33750400  |   |             |             |             |

|   |             |             |             |   |             |             |             |
|---|-------------|-------------|-------------|---|-------------|-------------|-------------|
| N | -3.18009000 | -1.57013500 | 0.85009700  | H | 4.76583100  | -0.56735300 | 1.65919700  |
| N | -2.83974800 | -0.28412700 | -1.68516700 | H | 3.19833900  | 0.11541400  | 2.05539600  |
| N | -3.24094200 | 1.27339400  | 0.59874300  | C | -3.41329000 | 1.20544100  | -1.07551100 |
| C | -2.38529100 | -1.54298400 | -2.27347700 | H | -4.49404300 | 1.37290300  | -1.14262600 |
| H | -1.43313700 | -1.82814500 | -1.82943600 | H | -2.97386400 | 1.77240600  | -1.90838300 |
| C | -2.98023600 | 1.34953400  | 2.03897800  |   |             |             |             |
| H | -3.70604400 | 0.78207800  | 2.63972300  |   |             |             |             |
| C | -2.31122400 | -2.05609000 | 1.91729500  |   |             |             |             |
| H | -1.28324300 | -1.73342900 | 1.74103800  |   |             |             |             |
| C | -4.53976800 | 1.86377900  | 0.24375500  |   |             |             |             |
| H | -4.46290000 | 2.35494800  | -0.72741900 |   |             |             |             |
| H | -4.74375800 | 2.66212500  | 0.96458900  |   |             |             |             |
| C | -5.70870800 | 0.86639700  | 0.23927200  |   |             |             |             |
| H | -5.91643600 | 0.54352700  | 1.26410900  |   |             |             |             |
| H | -6.61364700 | 1.38188600  | -0.12240700 |   |             |             |             |
| C | -3.91553900 | 0.37828200  | -2.40495200 |   |             |             |             |
| H | -3.82254200 | 1.45750400  | -2.26975300 |   |             |             |             |
| H | -3.75730600 | 0.19846300  | -3.47302400 |   |             |             |             |
| C | -5.31500000 | -0.12022900 | -1.98678500 |   |             |             |             |
| H | -6.07993700 | 0.58263300  | -2.34924700 |   |             |             |             |
| H | -5.51514600 | -1.08098200 | -2.46998600 |   |             |             |             |
| C | -4.58298800 | -1.84716700 | 1.16401400  |   |             |             |             |
| H | -4.89156200 | -1.25726800 | 2.04411000  |   |             |             |             |
| C | -4.66299400 | -2.90018400 | 1.46173900  |   |             |             |             |
| H | -5.54322100 | -1.60784900 | 0.00758000  |   |             |             |             |
| C | -5.33255700 | -2.33900500 | -0.77772300 |   |             |             |             |
| H | -6.56708800 | -1.80290800 | 0.36786300  |   |             |             |             |
| N | -5.38815400 | -0.28992200 | -0.55788400 |   |             |             |             |
| C | -3.11306400 | -2.35756600 | -2.14952600 |   |             |             |             |
| H | -2.19956400 | -1.38659700 | -3.33953800 |   |             |             |             |
| H | -2.32884800 | -3.15200200 | 1.95816200  |   |             |             |             |
| H | -2.62511000 | -1.67819400 | 2.90327400  |   |             |             |             |
| H | -1.98442900 | 0.95631500  | 2.25484100  |   |             |             |             |
| H | -3.00198800 | 2.39354900  | 2.36625600  |   |             |             |             |

**B1**

**E= -801.30555307 a.u.**

|    |             |             |             |  |  |  |  |
|----|-------------|-------------|-------------|--|--|--|--|
| Rh | -0.00000500 | 0.00002400  | -0.00007800 |  |  |  |  |
| P  | 1.60633100  | 1.67628000  | -0.30496800 |  |  |  |  |
| P  | 1.72086700  | -1.54716000 | -0.37482700 |  |  |  |  |
| C  | 3.34334700  | 1.38574900  | 0.33027400  |  |  |  |  |
| H  | 4.03602600  | 1.86953500  | -0.38787800 |  |  |  |  |
| C  | 3.41729200  | 1.94001600  | 1.27167000  |  |  |  |  |
| H  | 3.45070200  | -0.87844900 | -0.52744000 |  |  |  |  |
| H  | 4.12727900  | -1.73769200 | -0.47754200 |  |  |  |  |
| H  | 3.61616000  | -0.40893200 | -1.51253700 |  |  |  |  |
| P  | -1.60629100 | -1.67626900 | 0.30485800  |  |  |  |  |
| C  | -1.72088500 | 1.54714400  | 0.37490000  |  |  |  |  |
| P  | -3.34334900 | -1.38576700 | -0.33028300 |  |  |  |  |
| H  | -4.03598000 | -1.86958900 | 0.38789300  |  |  |  |  |
| H  | -3.41734500 | -1.93999300 | -1.27169800 |  |  |  |  |
| C  | -3.45068400 | 0.87835400  | 0.52758100  |  |  |  |  |
| H  | -4.12729700 | 1.73757600  | 0.47780700  |  |  |  |  |
| H  | -3.61604400 | 0.40874500  | 1.51265100  |  |  |  |  |
| N  | 3.70974300  | 0.00826800  | 0.59357500  |  |  |  |  |
| N  | -3.70977800 | -0.00827900 | -0.59348700 |  |  |  |  |
| C  | 5.07574400  | -0.08040200 | 1.09689800  |  |  |  |  |
| H  | 5.17278400  | 0.53593200  | 1.99474200  |  |  |  |  |
| H  | 5.29870500  | -1.11405300 | 1.37348200  |  |  |  |  |
| H  | 5.82448200  | 0.25745400  | 0.35994400  |  |  |  |  |
| C  | -5.07581200 | 0.08040000  | -1.09681500 |  |  |  |  |
| H  | -5.29880700 | 1.11406500  | -1.37322600 |  |  |  |  |
| H  | -5.17289500 | -0.53587500 | -1.99460400 |  |  |  |  |
| C  | -5.82450100 | -0.25751700 | -0.35974900 |  |  |  |  |
| H  | -1.44023200 | -3.41050400 | -0.30877500 |  |  |  |  |
| H  | -1.37825200 | -3.41330500 | -1.39957400 |  |  |  |  |
| H  | -0.55071500 | -3.89521100 | 0.09723300  |  |  |  |  |
| H  | -2.31542400 | -3.99422900 | -0.00695700 |  |  |  |  |
| C  | 1.64208500  | -2.58513900 | -1.89545600 |  |  |  |  |
| H  | 1.49566700  | -1.94130900 | -2.76643000 |  |  |  |  |
| H  | 2.56754000  | -3.15519800 | -2.02249800 |  |  |  |  |
| H  | 0.80792700  | -3.28542200 | -1.84751100 |  |  |  |  |
| C  | 2.01613400  | -2.74432800 | 0.99281100  |  |  |  |  |
| H  | 1.08921300  | -3.21249200 | 1.32590800  |  |  |  |  |
| H  | 2.72306600  | -3.52306500 | 0.69099400  |  |  |  |  |
| C  | 2.43319800  | -2.18025600 | 1.83134300  |  |  |  |  |
| H  | -1.64206400 | 2.58505000  | 1.89558200  |  |  |  |  |
| H  | -2.56764600 | 3.15485400  | 2.02284400  |  |  |  |  |
| H  | -1.49528900 | 1.94122100  | 2.76649600  |  |  |  |  |
| H  | -0.80811600 | 3.28557200  | 1.84749500  |  |  |  |  |
| C  | -2.01629700 | 2.74437700  | -0.99265000 |  |  |  |  |
| H  | -1.08942000 | 3.21260700  | -1.32577800 |  |  |  |  |
| H  | -2.43338900 | 2.18034100  | -1.83119200 |  |  |  |  |
| H  | -2.72324600 | 3.52306100  | -0.69073600 |  |  |  |  |
| C  | 1.44032900  | 3.41052100  | 0.30865300  |  |  |  |  |
| H  | 0.55084700  | 3.89526000  | -0.09739300 |  |  |  |  |
| H  | 1.37831200  | 3.41333200  | 1.39944900  |  |  |  |  |
| H  | 2.31555600  | 3.99420700  | 0.00686100  |  |  |  |  |
| C  | 1.85455400  | 1.97199400  | -2.10964900 |  |  |  |  |
| H  | 2.64629200  | 2.70442900  | -2.29356900 |  |  |  |  |
| H  | 2.10318700  | 1.03658300  | -2.61576100 |  |  |  |  |
| H  | 0.91979800  | 2.33972900  | -2.54081300 |  |  |  |  |
| C  | -1.85444400 | -1.97196700 | 2.10954900  |  |  |  |  |
| H  | -2.10315300 | -1.03656000 | 2.61563300  |  |  |  |  |
| H  | -2.64611700 | -2.70446400 | 2.29350200  |  |  |  |  |
| H  | -0.91964800 | -2.33960600 | 2.54070700  |  |  |  |  |

**B1-H<sub>2</sub>**

**E= -802.48197015 a.u.**

|    |             |             |             |  |  |  |  |
|----|-------------|-------------|-------------|--|--|--|--|
| Rh | 0.01656600  | 0.18000700  | -0.82898900 |  |  |  |  |
| P  | -2.11461300 | 1.12194800  | -0.69396700 |  |  |  |  |
| P  | -0.82784300 | -1.73647200 | 0.28775700  |  |  |  |  |
| C  | -3.17059100 | 0.68248800  | 0.76562100  |  |  |  |  |
| H  | -2.75070000 | 1.15624000  | 1.67245800  |  |  |  |  |
| H  | -4.14797100 | 1.14320700  | 0.58688100  |  |  |  |  |
| C  | -2.19262200 | -1.40856200 | 1.51002200  |  |  |  |  |
| H  | -2.50728100 | -2.38384300 | 1.89635900  |  |  |  |  |
| H  | -1.77320800 | -0.84202800 | 2.36271900  |  |  |  |  |
| P  | 2.12915400  | -0.74913700 | -1.13585700 |  |  |  |  |
| P  | 1.04445800  | 1.72697600  | 0.66137800  |  |  |  |  |
| C  | 3.18602800  | -0.99379100 | 0.38378900  |  |  |  |  |
| H  | 4.23856200  | -0.80229800 | 0.09683900  |  |  |  |  |
| C  | 3.11492800  | -2.05412100 | 0.64680600  |  |  |  |  |
| C  | 2.74018300  | 1.22431000  | 1.26288300  |  |  |  |  |
| H  | 2.93107400  | 1.77559100  | 2.18773000  |  |  |  |  |
| H  | 3.51257700  | 1.54656600  | 0.54377400  |  |  |  |  |
| C  | 2.24537800  | -2.39496800 | -1.94671100 |  |  |  |  |
| C  | 1.70387700  | -3.14653400 | -1.36840000 |  |  |  |  |
| H  | 1.78387700  | -2.32825500 | -2.93515000 |  |  |  |  |

**TS<sub>A7-8'</sub>**

**E= -881.11639513 a.u.**

|   |             |             |              |  |  |  |  |
|---|-------------|-------------|--------------|--|--|--|--|
| P | -1.10140800 | 1.93973400  | 0.41457200   |  |  |  |  |
| P | -1.38846200 | -0.83632100 | -1.35881400  |  |  |  |  |
| C | -2.93076100 | 1.74743300  | 0.27370700   |  |  |  |  |
| H | -3.23304600 | 1.07392700  | 1.08338800   |  |  |  |  |
| H | -3.37096900 | 2.73338100  | 0.46634900   |  |  |  |  |
| C | -3.16239300 | -0.29303600 | -1.24840900  |  |  |  |  |
| H | -3.66430300 | -0.65308600 | -2.15542200  |  |  |  |  |
| C | -3.59890700 | -0.82965700 | -0.39708300  |  |  |  |  |
| P | 1.50377300  | -1.88779400 | 0.16560300   |  |  |  |  |
| P | 2.15446700  | 1.28517000  | -0.27051200  |  |  |  |  |
| C | 3.10939200  | -1.81782800 | 1.11659800   |  |  |  |  |
| H | 3.81150900  | -2.50059300 | 0.62171800   |  |  |  |  |
| C | 2.90255700  | -2.23836300 | 2.10607600   |  |  |  |  |
| C | 3.77257100  | 0.39392600  | -0.01198600  |  |  |  |  |
| H | 4.57422600  | 1.14056900  | 0.01806800   |  |  |  |  |
| H | 3.97606500  | -0.24635700 | -0.87867600  |  |  |  |  |
| C | 0.76843200  | -3.38861100 | 0.93860800   |  |  |  |  |
| H | 0.50245100  | -3.14388800 | 1.96989400   |  |  |  |  |
| H | -0.14117800 | -3.68702500 | 0.41683000   |  |  |  |  |
| H | 1.48101500  | -4.21998000 | 0.93163500   |  |  |  |  |
| C | -1.74623900 | -2.64978900 | -1.50144700  |  |  |  |  |
| H | -2.17039300 | -3.00144400 | -0.55644900  |  |  |  |  |
| H | -2.47882200 | -2.83012800 | -2.29524100  |  |  |  |  |
| C | -0.84582200 | -3.22483400 | -1.72771400  |  |  |  |  |
| H | -1.00364300 | -0.43903700 | -3.12864600  |  |  |  |  |
| H | -0.02847000 | -0.86218800 | -3.38585900  |  |  |  |  |
| H | -1.76208400 | -0.82828500 | -3.81758100  |  |  |  |  |
| H | -0.93131000 | 0.64588500  | -3.24440700  |  |  |  |  |
| C | 2.43102100  | 1.96299100  | -1.97266000  |  |  |  |  |
| C | 3.40040900  | 2.46555000  | -2.06720500  |  |  |  |  |
| H | 2.37762200  | 1.13932500  | -2.68999000  |  |  |  |  |
| H | 1.63622000  | 2.67087700  | -2.22095200  |  |  |  |  |
| C | 2.54471100  | 2.78601400  | 0.75424300   |  |  |  |  |
| H | 1.73712200  | 3.51929300  | 0.71413400   |  |  |  |  |
| H | 2.65753200  | 2.47768000  | 1.79761500   |  |  |  |  |
| C | 3.47012700  | 3.26763200  | 0.42017500   |  |  |  |  |
| H | -0.83816100 | 3.37581800  | -0.72446600  |  |  |  |  |
| H | 0.16584900  | 3.78961000  | -0.61626200  |  |  |  |  |
| H | -0.95543300 | 3.04525500  | -1.75992600  |  |  |  |  |
| H | -1.56578400 | 4.16765400  | -0.51975100  |  |  |  |  |
| C | -0.96484300 | 2.69550600  | 2.08444000   |  |  |  |  |
| H | 0.08194100  | 2.89001800  | 2.32504000   |  |  |  |  |
| H | -1.54055500 | 3.62433400  | 2.15145800   |  |  |  |  |
| H | -1.35460100 | 1.96632800  | 2.79970300   |  |  |  |  |
| C | 2.07780400  | -2.54243000 | -1.46764300  |  |  |  |  |
| C | 2.65967300  | -1.77369400 | -1.98227900  |  |  |  |  |
| H | 2.69147900  | -3.44146300 | -1.35055900  |  |  |  |  |
| H | 1.21800700  | -2.78202300 | -2.09685200  |  |  |  |  |
| H | -0.88361400 | -0.40801000 | 2.13349100   |  |  |  |  |
| H | 0.05614200  | -0.30160800 | 1.95676200   |  |  |  |  |
| O | -2.17252800 | -0.49644600 | 2.47237800   |  |  |  |  |
| C | -2.62444400 | -1.62449100 | 2.05621300</ |  |  |  |  |

|   |             |             |             |
|---|-------------|-------------|-------------|
| H | 3.28709700  | -2.70999100 | -2.05874400 |
| C | 0.32431000  | -2.65538000 | 1.39986100  |
| H | 0.89333800  | -1.94168500 | 2.00167800  |
| H | -0.22254700 | -3.34647800 | 2.04868100  |
| H | 1.02673600  | -3.24229100 | 0.80257000  |
| C | -1.58189800 | -3.09454600 | -0.70149700 |
| H | -0.88929700 | -3.40729100 | -1.48637800 |
| H | -1.83796300 | -3.95642800 | -0.07695300 |
| H | -2.48996200 | -2.71556900 | -1.17651700 |
| C | 1.39131500  | 3.46531700  | 0.14875100  |
| H | 1.93423900  | 4.01636100  | 0.92347100  |
| H | 1.98076200  | 3.46041100  | -0.77180000 |
| H | 0.45410300  | 3.98562000  | -0.06045700 |
| C | 0.20344500  | 1.96246800  | 2.28728400  |
| H | -0.80916700 | 2.34635400  | 2.14154300  |
| H | 0.13456700  | 0.99187100  | 2.78587400  |
| H | 0.75105700  | 2.66073300  | 2.92790800  |
| C | -3.19346000 | 0.64284300  | -2.09853500 |
| H | -2.70480500 | 0.90381000  | -3.03985000 |
| H | -3.34506000 | -0.43798300 | -2.07033100 |
| H | -4.16384300 | 1.14420900  | -2.04031900 |
| C | -2.24814700 | 2.95651300  | -0.68262500 |
| H | -3.29322300 | 3.27394700  | -0.74474600 |
| H | -1.81157500 | 3.36673300  | 0.23146500  |
| H | -1.70184200 | 3.36061300  | -1.53828500 |
| C | 3.18889100  | 0.27241600  | -2.23951300 |
| H | 3.30452300  | 1.27633700  | -1.82487300 |
| H | 4.17618800  | -0.17890300 | -2.37474600 |
| H | 2.69844600  | 0.36513900  | -3.21168500 |
| H | 0.10970800  | 0.81813400  | -2.45980400 |
| N | -0.23917100 | 0.00244200  | -2.55401400 |
| H | 2.78704400  | -0.20804700 | 1.53943300  |
| N | -3.35086500 | -0.75185800 | 0.91992000  |
| C | -4.57354200 | -1.05447400 | 1.66217100  |
| H | -4.54599900 | -0.67170700 | 2.69675100  |
| H | -5.43230600 | -0.61293100 | 1.15053400  |
| H | -4.72392300 | -2.13617600 | 1.69482200  |
| C | 3.61645100  | -0.53797700 | 2.69457800  |
| H | 4.68122100  | -0.29345400 | 2.54124500  |
| H | 3.25543600  | 0.00315400  | 3.57269200  |
| H | 3.53702200  | -1.60891200 | 2.90315900  |

**B2**

**E= -802.50220898 a.u.**

|    |             |             |             |
|----|-------------|-------------|-------------|
| Rh | -0.00065100 | 0.28265600  | -0.79631900 |
| P  | -2.17966200 | 1.09630200  | -0.74599200 |
| P  | -0.70151700 | -1.70752100 | 0.34524900  |
| C  | -3.22582500 | 0.55131900  | 0.69041200  |
| H  | -2.85996200 | 1.04878600  | 1.60820100  |
| H  | -4.23342100 | 0.93759700  | 0.50321900  |
| C  | -2.13972800 | -1.47502600 | 1.50009500  |
| H  | -2.41142200 | -2.46908500 | 1.87018200  |
| H  | -1.81181500 | -0.88280400 | 2.37359600  |
| P  | 2.12549100  | -0.46696300 | -1.36421500 |
| P  | 0.92651400  | 1.53830500  | 1.03684900  |
| C  | 3.28977300  | -0.85298600 | 0.05276200  |
| H  | 4.30490100  | -0.52808800 | -0.24796500 |
| H  | 3.32068900  | -1.94440600 | 0.14143200  |
| C  | 2.71952800  | 1.13587300  | 1.33714500  |
| H  | 2.99373600  | 1.55098100  | 2.31221800  |
| H  | 3.35110700  | 1.65038900  | 0.59321300  |
| N  | -3.29920500 | -0.89555100 | 0.83238000  |
| N  | 2.90933400  | -0.30972200 | 1.34702700  |
| C  | -4.54852900 | -1.30935000 | 1.46926800  |
| H  | -5.39598700 | -0.93555700 | 0.88955300  |
| H  | -4.60998600 | -2.40022400 | 1.48144400  |
| H  | -4.64133300 | -0.94013100 | 2.50473300  |
| C  | 3.83101100  | -0.75886500 | 2.38555100  |
| H  | 3.48370100  | -0.40856400 | 3.36115500  |
| H  | 3.84889400  | -1.85246700 | 2.40844400  |
| H  | 4.86197400  | -0.39928600 | 2.22888400  |
| C  | 2.22750300  | -2.01886400 | -2.34040700 |
| C  | 1.75250500  | -2.83726400 | -1.79377900 |
| H  | 1.69253400  | -1.87752400 | -3.28210800 |
| H  | 3.26762600  | -2.28474900 | -2.55094700 |
| C  | 0.47978100  | -2.62299200 | 1.42012600  |
| H  | 0.98347000  | -1.93207000 | 2.09932100  |
| H  | -0.02151200 | -3.41837800 | 1.97987200  |
| H  | 1.24908200  | -3.07766300 | 0.78908300  |
| C  | -1.35532200 | -3.02378700 | -0.75582700 |
| H  | -0.62251900 | -3.25825500 | -1.53077900 |
| H  | -1.59985500 | -3.93251100 | -0.19747700 |
| H  | -2.25758300 | -2.64596100 | -1.24179200 |
| C  | 1.01204900  | 3.36673500  | 0.85327100  |
| H  | 1.60295200  | 3.82101000  | 1.65446000  |
| H  | 1.46161500  | 3.60722700  | -0.11309200 |
| H  | 0.00994000  | 3.79882900  | 0.87274700  |
| C  | 0.24322200  | 1.32768100  | 2.73473700  |
| H  | -0.82597100 | 1.55402300  | 2.73820000  |
| H  | 0.37638200  | 0.28726900  | 3.04383600  |
| H  | 0.74520100  | 1.98072900  | 3.45494800  |
| C  | -3.20246500 | 0.60205000  | -2.18225000 |

**B3**

**E= -1383.48378870 a.u.**

|    |             |             |             |
|----|-------------|-------------|-------------|
| Rh | 1.57402900  | 0.17002000  | -0.51720300 |
| P  | 1.25119400  | 2.38194500  | -1.09980900 |
| P  | 1.30464200  | 0.58485100  | 1.83246300  |
| H  | 0.88878000  | 3.53033700  | 0.30927700  |
| C  | 1.83082000  | 3.78440700  | 0.82844500  |
| H  | 0.50599800  | 4.46095400  | -0.12292100 |
| C  | 0.48058600  | 2.20785900  | 2.29632800  |
| H  | -0.31308900 | 1.95658600  | 3.00650100  |
| H  | 1.22409400  | 2.81454900  | 2.84997200  |
| P  | 1.40500700  | -2.14868200 | -0.46972900 |
| C  | 3.97450100  | -0.06755300 | -0.67955300 |
| C  | 2.62596200  | -3.02232500 | 0.64655000  |
| H  | 2.90056500  | -3.98527300 | 0.17326100  |
| H  | 2.08789500  | -3.26354200 | 1.56983000  |
| C  | 4.55430500  | -1.76802900 | -0.15883100 |
| H  | 5.61423500  | -1.68897100 | 0.10239300  |
| H  | 4.49956300  | -2.46520500 | -1.01204500 |
| N  | -0.11036500 | 2.96185500  | 1.20430100  |
| N  | 3.80183500  | -2.23836500 | 1.00194300  |
| C  | -1.04223800 | 3.96762600  | 1.70335800  |
| H  | -1.51681400 | 4.47716300  | 0.86069600  |
| H  | -1.83272300 | 3.48091400  | 2.28125300  |
| H  | -0.55672100 | 4.72412300  | 2.34438700  |
| C  | 4.63554600  | -2.96828600 | 1.95215300  |
| H  | 5.46371500  | -2.33317300 | 2.27822100  |
| H  | 4.04286500  | -3.22621900 | 2.83479100  |
| H  | 5.05186500  | -3.89948000 | 1.53144100  |
| C  | -0.18648300 | -2.92542600 | 0.01164300  |
| H  | -0.41783800 | -2.71184200 | 1.05525600  |
| H  | -0.98085200 | -2.48500000 | -0.59614900 |
| H  | -0.15491400 | -4.00810600 | -0.14280900 |
| C  | 2.76477900  | 0.61873200  | 2.95498100  |
| H  | 3.41141900  | 1.46243500  | 2.70078400  |
| H  | 2.46068700  | 0.71371700  | 4.00201100  |
| H  | 3.32145700  | -0.31237300 | 2.81374900  |
| C  | 0.23341700  | -0.63634600 | 2.69060600  |
| H  | 0.74718300  | -1.60173000 | 2.71226200  |
| H  | 0.03199900  | -0.33295700 | 3.72261600  |
| H  | -0.70598800 | -0.73401100 | 2.13492000  |
| C  | 4.69470100  | 0.06599600  | -2.36846000 |
| H  | 5.74942400  | -0.22503700 | -2.38803300 |
| H  | 4.12649900  | -0.56651800 | -3.05470400 |
| H  | 4.60881000  | 1.09812800  | -2.71706800 |
| C  | 5.11872300  | 0.99001700  | 0.30918800  |
| H  | 4.84947800  | 2.04406600  | 0.20512900  |
| H  | 5.03659900  | 0.71772000  | 1.36314700  |
| H  | 6.15630900  | 0.85467000  | -0.01096500 |
| C  | -0.19493900 | 2.62612000  | -2.19317700 |
| H  | -0.02266800 | 2.09379800  | -3.13184100 |
| H  | -1.06372700 | 2.18286400  | -1.69880800 |
| H  | -0.37190000 | 3.68594500  | -2.39908300 |
| C  | 2.59706300  | 3.27087800  | -1.98391700 |
| H  | 2.32064600  | 4.31057200  | -2.18407000 |
| H  | 3.51817500  | 3.25749100  | -1.39552300 |
| C  | 2.78433500  | 2.76844400  | -2.93629300 |
| H  | 1.69593700  | -2.92850700 | -2.11069900 |
| H  | 2.66239100  | -2.62085100 | -2.51562400 |
| H  | 1.65992500  | -4.02009700 | -2.04608800 |
| H  | 0.92145600  | -2.57725900 | -2.79681000 |
| H  | 1.47457800  | -0.02991100 | -2.08833900 |
| H  | 0.00473600  | 0.17646100  | -0.53799900 |
| P  | -2.85383700 | 0.22354500  | -0.32620600 |
| N  | -4.24142000 | 1.28466100  | -0.30690000 |
| N  | -2.85969400 | -0.59742800 | 1.23178700  |
| N  | -3.03696700 | -1.04037800 | -1.49341100 |
| C  | -3.07142800 | 0.33593900  | 2.32866000  |
| H  | -2.50408200 | 1.25411900  | 2.13741800  |
| C  | -2.08348000 | -0.97893400 | -2.59826100 |
| C  | -2.58438700 | -0.75857100 | -3.55116000 |
| H  | -3.91117200 | 2.64716900  | -0.71336800 |
| H  | -2.86092000 | 2.85393900  | -0.49162800 |
| C  | -3.91926600 | -2.20250400 | -1.61098800 |
| H  | -3.44257100 | -3.08615800 | -1.15775500 |
| H  | -4.01827600 | -2.43746500 | -2.67850300 |
| C  | -5.34276800 | -2.03815800 | -1.05946000 |
| H  | -5.93418300 | -1.47043000 | -1.78334700 |
| H  | -5.79265400 | -3.04502000 | -1.00682800 |

|   |             |             |             |
|---|-------------|-------------|-------------|
| C | -3.39166100 | -1.92772700 | 1.47047600  |
| H | -2.93594400 | -2.61504600 | 0.75494000  |
| H | -3.06078200 | -2.25716300 | 2.46584200  |
| C | -4.92718500 | -2.02200900 | 1.37862800  |
| H | -5.22319700 | -3.08423200 | 1.39643000  |
| H | -5.37858200 | -1.55727500 | 2.26110900  |
| C | -5.63110300 | 0.95823900  | -0.59450000 |
| H | -5.75857100 | 0.70168700  | -1.66039100 |
| H | -6.23711000 | 1.85740600  | -0.42595700 |
| C | -6.19354000 | -0.14956200 | 0.28606900  |
| H | -6.18394400 | 0.19195700  | 1.32525000  |
| H | -7.24985800 | -0.30990800 | 0.00729300  |
| N | -5.42026800 | -1.36248700 | 0.20358300  |
| H | -4.12216500 | 0.62820200  | 2.46584300  |
| H | -2.70673000 | -0.10585800 | 3.26424800  |
| H | -4.52225900 | 3.36466200  | -0.15170900 |
| H | -4.07974200 | 2.82651800  | -1.78777900 |
| H | -1.32801400 | -0.21296100 | -2.41120400 |
| H | -1.55949500 | -1.93996900 | -2.71805000 |

**B4**

**E= -1383.46324012 a.u.**

|    |             |             |             |
|----|-------------|-------------|-------------|
| Rh | 1.65217400  | 0.22364000  | -0.54044300 |
| P  | 0.85373500  | 2.20495500  | -1.29726000 |
| P  | 1.47002400  | 0.81635600  | 1.70172300  |
| C  | 0.44178300  | 3.55207600  | -0.06407800 |
| H  | 1.36848800  | 4.12537900  | 0.12828500  |
| H  | -0.25870600 | 4.24061400  | -0.54998500 |
| C  | 0.84898700  | 2.53481100  | 2.09739900  |
| H  | 0.42328900  | 2.49908900  | 3.10624800  |
| H  | 1.73424800  | 3.19756000  | 2.15047200  |
| P  | 1.35450900  | -2.08280700 | -0.26853200 |
| P  | 4.01755300  | -0.10900300 | -0.77549300 |
| C  | 2.61884900  | -2.87194200 | 0.88425400  |
| H  | 2.81816300  | -3.90222100 | 0.52281800  |
| H  | 2.12269400  | -2.97296400 | 1.85769400  |
| C  | 4.56421100  | -1.78954000 | -0.13811800 |
| H  | 5.63911300  | -1.74787500 | 0.06835200  |
| H  | 4.43221800  | -2.55422900 | -0.92287400 |
| N  | -0.15573200 | 3.09658300  | 1.19376600  |
| C  | 3.85438000  | -2.13143800 | 1.09519900  |
| N  | -0.81881900 | 4.21935800  | 1.85624200  |
| H  | -1.57258800 | 4.65233200  | 1.19156900  |
| H  | -1.32189500 | 3.87031600  | 2.76319200  |
| H  | -0.11248300 | 5.01980500  | 2.13683300  |
| C  | 4.70318400  | -2.82577200 | 2.05335900  |
| C  | 5.58389600  | -2.21698700 | 2.27748500  |
| H  | 4.15432300  | -2.97843500 | 2.98829500  |
| H  | 5.04440200  | -3.81266200 | 1.69147200  |
| C  | -0.13127900 | -3.01597900 | 0.35626900  |
| H  | -0.48251100 | -2.58624100 | 1.29686800  |
| H  | -0.93733500 | -2.91616500 | -0.37603200 |
| H  | 0.08574600  | -4.08159500 | 0.49520400  |
| C  | 2.93798100  | 0.82433300  | 2.82582200  |
| H  | 3.64160000  | 1.59567900  | 2.50253500  |
| H  | 2.66208600  | 1.01126300  | 3.86919200  |
| C  | 3.42862900  | -0.14967800 | 2.73476600  |
| C  | 0.33341500  | -0.22596500 | 2.72691500  |
| H  | 0.79871100  | -1.20799100 | 2.85678200  |
| H  | 0.14738000  | 0.20300700  | 3.71764100  |
| H  | -0.60665300 | -0.36906100 | 2.19277000  |
| C  | 4.72084600  | -0.17341100 | -2.48391300 |
| H  | 5.76418500  | -0.50748400 | -2.49996000 |
| H  | 4.11218300  | -0.84259200 | -3.09759500 |
| H  | 4.66162100  | 0.82464900  | -2.92693500 |
| C  | 5.29282000  | 0.94006600  | 0.06816800  |
| H  | 5.10218600  | 1.99605000  | -0.14089200 |
| H  | 5.22165000  | 0.78530400  | 1.14729900  |
| H  | 6.30834300  | 0.68792100  | -0.25695900 |
| C  | -0.63834400 | 2.27197400  | -2.40387100 |
| H  | -0.41844000 | 1.67860600  | -3.29576500 |
| H  | -1.50443000 | 1.82732300  | -1.90937800 |
| H  | -0.88339500 | 3.29570500  | -2.70799800 |
| C  | 2.00593900  | 3.18217000  | -2.36889600 |
| H  | 1.58029400  | 4.14058900  | -2.68682800 |
| H  | 2.93794700  | 3.36110000  | -1.82650600 |
| C  | 2.24035800  | 2.58330900  | -3.25307100 |
| H  | 1.64714000  | -3.05068700 | -1.82044600 |
| H  | 2.58660400  | -2.73229600 | -2.27701200 |
| H  | 1.67835000  | -4.13038000 | -1.63940800 |
| H  | 0.85165700  | -2.82259200 | -2.53422700 |
| H  | 1.53177800  | -0.11077500 | -2.10774900 |
| H  | -1.81590800 | 0.40717700  | -0.00552300 |
| P  | -3.10325800 | -0.17564000 | -0.04663600 |
| N  | -3.98193200 | 1.25951600  | 0.11654800  |
| N  | -3.01701200 | -1.18282400 | 1.33415200  |
| N  | -2.95242200 | -1.02736700 | -1.48484200 |
| C  | -3.21116400 | -0.51144200 | 2.61949500  |
| H  | -2.69142600 | 0.44978100  | 2.62114000  |
| C  | -1.69565800 | -1.03407000 | -2.23916700 |
| H  | -1.82450400 | -0.51880300 | -3.19731600 |
| C  | -3.28760600 | 2.54665900  | 0.09981800  |
| H  | -2.22604700 | 2.42143500  | 0.33347100  |

|   |             |             |             |
|---|-------------|-------------|-------------|
| C | -3.99612100 | -1.86355400 | -2.05850800 |
| H | -3.83021300 | -2.92005000 | -1.80211900 |
| H | -3.95000700 | -1.78822400 | -3.14953600 |
| C | -5.35020100 | -1.38004300 | -1.56882700 |
| H | -5.62013000 | -0.46547700 | -2.10233500 |
| H | -6.13856800 | -2.12176500 | -1.74116100 |
| C | -3.70317800 | -2.45320800 | 1.17662400  |
| H | -3.17138100 | -3.04791400 | 0.42855200  |
| H | -3.65708800 | -3.00658300 | 2.11770500  |
| C | -5.16932500 | -2.22328100 | 0.75079400  |
| H | -5.58112000 | -3.10965900 | 0.25906100  |
| H | -5.79026000 | -2.01722200 | 1.62527300  |
| C | -5.41044200 | 1.34774300  | -0.14002200 |
| H | -5.60093200 | 1.57089700  | -1.20063100 |
| H | -5.82922500 | 2.17763900  | 0.43795900  |
| C | -6.06919900 | 0.04906000  | 0.29293300  |
| H | -6.12568400 | 0.02368600  | 1.38298500  |
| H | -7.08612000 | -0.04453200 | -0.10646400 |
| N | -5.20839700 | -1.05542400 | -0.14678700 |
| H | -4.26888100 | -0.32303800 | 2.85346600  |
| H | -2.77740200 | -1.12832300 | 3.41106100  |
| H | -3.72174600 | 3.19534900  | 0.86803100  |
| H | -3.38716300 | 3.04227400  | -0.87439600 |
| H | -0.87823500 | -0.56039800 | -1.68363200 |
| H | -1.40304500 | -2.07082100 | -2.43900600 |

**B5**

**E= -802.04038939 a.u.**

|    |             |             |             |
|----|-------------|-------------|-------------|
| Rh | 0.00328100  | -0.13815300 | -0.41202700 |
| P  | -1.85714000 | -1.52328800 | -0.37585500 |
| P  | -1.11062300 | 1.82806500  | 0.19805100  |
| C  | -3.41639600 | -0.56550600 | -0.76683500 |
| H  | -3.38046300 | -0.28505600 | -1.83590800 |
| H  | -4.26537900 | -1.24782600 | -0.63792500 |
| C  | -2.90049100 | 1.79031200  | -0.34706500 |
| H  | -3.39899400 | 2.67257800  | 0.07260500  |
| H  | -2.92018300 | 1.89621600  | -1.44803300 |
| P  | 1.13409400  | -0.81982500 | 1.49127000  |
| P  | 1.98939400  | -0.03798400 | -1.53072100 |
| C  | 2.79547300  | -0.00372200 | 1.82517900  |
| H  | 3.46915100  | -0.76654200 | 2.27010400  |
| H  | 2.61199600  | 0.75117400  | 2.59865600  |
| C  | 3.54454900  | -0.16254800 | -0.49649000 |
| H  | 4.38182300  | 0.20256100  | -1.10188300 |
| H  | 3.76423100  | -1.22130900 | -0.26308100 |
| N  | -3.62462800 | 0.59822300  | 0.09334300  |
| N  | 3.42834300  | 0.66462100  | 0.69872000  |
| C  | -5.04419600 | 0.87747700  | 0.26347100  |
| H  | -5.54643100 | -0.00431000 | 0.67226600  |
| H  | -5.17619000 | 1.69674800  | 0.97635100  |
| H  | -5.54575700 | 1.15538600  | -0.68261500 |
| C  | 4.69302500  | 1.25209200  | 1.10417600  |
| H  | 5.11703000  | 1.82750600  | 0.27610400  |
| H  | 4.52717200  | 1.93847400  | 1.94083800  |
| H  | 5.43763600  | 0.49707300  | 1.42291800  |
| C  | 0.41671000  | -0.66914900 | 3.19179100  |
| H  | 0.15835500  | 0.37438800  | 3.38606900  |
| H  | -0.50080100 | -1.26145400 | 3.24237300  |
| H  | 1.11193900  | -1.02094200 | 3.96196800  |
| C  | -0.64065700 | 3.44923200  | -0.56865300 |
| H  | -0.54690600 | 3.31182300  | -1.64922000 |
| H  | -1.36582300 | 4.24572800  | -0.36085200 |
| H  | 0.33828900  | 3.74669100  | -0.18207300 |
| C  | -1.36177400 | 2.36543000  | 1.95593000  |
| H  | -0.38872800 | 2.53292800  | 2.42752100  |
| H  | -1.95443200 | 3.28509400  | 2.03082300  |
| H  | -1.87644900 | 1.56233700  | 2.49138000  |
| C  | 2.41604500  | -1.26388500 | -2.85339700 |
| H  | 3.40481300  | -1.08750600 | -3.29405600 |
| H  | 2.37641500  | -2.27184300 | -2.43090300 |
| H  | 1.65597700  | -1.20256400 | -3.63690200 |
| C  | 2.34983200  | 1.54636800  | -2.41681400 |
| H  | 1.52781700  | 1.75865500  | -3.10521600 |
| H  | 2.38807600  | 2.34533200  | -1.67165200 |
| H  | 3.29442400  | 1.51401100  | -2.97243100 |
| C  | -2.43415700 | -2.34988100 | 1.18139400  |
| H  | -1.66958000 | -3.04004400 | 1.54976300  |
| H  | -2.59873600 | -1.57328300 | 1.93389400  |
| H  | -3.36759800 | -2.90516800 | 1.03305000  |
| C  | -2.08933600 | -2.90489200 | -1.59086500 |
| H  | -3.08610900 | -3.35953300 | -1.53346000 |
| H  | -1.92161500 | -2.51442900 | -2.59820900 |
| H  | -1.33343700 | -3.67178900 | -1.40011200 |
| C  | 1.61568500  | -2.60993600 | 1.53108100  |
| H  | 2.18825400  | -2.84666200 | 0.63066600  |
| H  | 2.20262200  | -2.87046100 | 2.41926700  |
| H  | 0.70516000  | -3.21547300 | 1.50906400  |
| H  | -0.59295800 | 0.21561700  | -1.86291900 |

**B6**

**E= -990.57296532 a.u.**

|    |             |             |             |   |             |             |             |
|----|-------------|-------------|-------------|---|-------------|-------------|-------------|
| Rh | 0.08418300  | 0.07477000  | -0.17018400 | C | 1.91954300  | -2.74926700 | 1.31745300  |
| P  | -1.76349700 | -0.40706500 | -1.49506500 | H | 2.19845900  | -2.11399000 | 2.16197700  |
| C  | -0.87000400 | -0.58860200 | 1.86755100  | H | 0.94634200  | -3.19428500 | 1.52819400  |
| P  | -3.35253800 | -0.24711400 | -0.52245000 | H | 2.66659700  | -3.54068300 | 1.19226500  |
| H  | -3.51940500 | 0.82561800  | -0.32165400 | C | -1.62149200 | 3.01411100  | 0.99149800  |
| H  | -4.16994700 | -0.58758000 | -1.16938400 | H | -1.56183400 | 3.26379200  | -0.07228300 |
| C  | -2.72901800 | -0.38506100 | 1.84158300  | H | -2.56901100 | 3.35802700  | 1.41896300  |
| H  | -3.13101700 | -0.81735700 | 2.76612200  | H | -0.80432100 | 3.50127400  | 1.52661400  |
| H  | -2.95011200 | 0.69873100  | 1.86472900  | C | -1.20863300 | 0.96011800  | 2.96740300  |
| P  | 1.50860500  | -1.65112400 | -0.76771800 | H | -0.16777600 | 1.18460900  | 3.21380900  |
| P  | 1.87117400  | 1.50384500  | -0.13360900 | H | -1.86941800 | 1.60423900  | 3.55777800  |
| C  | 3.20000900  | -1.68014800 | 0.05269700  | H | -1.40304600 | -0.08594800 | 3.21812000  |
| C  | 3.93493300  | -2.05171200 | -0.69272700 | C | 2.14761500  | 1.58814600  | -2.00312400 |
| H  | 3.14003000  | -2.43494600 | 0.84549900  | H | 3.02673100  | 2.21394500  | -2.19079900 |
| C  | 3.56815100  | 0.71926300  | -0.22598600 | H | 2.31648500  | 0.58776000  | -2.40819600 |
| H  | 4.29829800  | 1.46731500  | 0.10267500  | H | 1.26759900  | 2.02614100  | -2.48621800 |
| N  | 3.82085700  | 0.47314800  | -1.27436800 | C | 1.57184500  | 3.32584800  | 0.13070000  |
| H  | -3.37442700 | -1.04317400 | 0.70568600  | H | 0.72179600  | 3.68125200  | -0.45701700 |
| N  | 3.64577100  | -0.43647600 | 0.65952900  | H | 1.40155400  | 3.50723000  | 1.19459200  |
| C  | -4.73247200 | -1.45142100 | 1.04019700  | H | 2.47928600  | 3.85398200  | -0.18079700 |
| H  | -5.16873200 | -2.00296300 | 0.20223900  | C | -1.52261100 | -3.36103600 | 0.11496200  |
| H  | -4.71450000 | -2.11939200 | 1.90659300  | H | -0.55470900 | -3.84289800 | -0.04170400 |
| H  | -5.39471600 | -0.59674900 | 1.27454900  | H | -1.71864500 | -3.31948700 | 1.19024500  |
| C  | 4.96154600  | -0.60483900 | 1.25108700  | C | -2.29579600 | -3.96803500 | -0.36704600 |
| H  | 5.24752500  | 0.30614300  | 1.78490200  | H | -1.51446400 | -1.88055400 | -2.37471500 |
| H  | 4.93633100  | -1.42568900 | 1.97497200  | H | -2.29177200 | -2.58905900 | -2.68042200 |
| H  | 5.74468800  | -0.83249800 | 0.50210700  | H | -1.71297100 | -0.89940400 | -2.81638700 |
| C  | 1.07171100  | -3.43410700 | -0.52790900 | H | -0.54272300 | -2.24152100 | -2.71615000 |
| H  | 0.84520800  | -3.61405800 | 0.52547100  | C | 1.96754600  | -2.86460500 | -1.56678300 |
| H  | 0.17747900  | -3.66387200 | -1.11241200 | C | 2.01005800  | -2.32115800 | -2.51492000 |
| H  | 1.88330500  | -4.09895300 | -0.84331400 | H | 2.86461800  | -3.48488100 | -1.46868000 |
| C  | -0.51637600 | 0.37811400  | 3.40957400  | H | 1.09379600  | -3.52044200 | -1.59173400 |
| H  | -0.64850700 | 1.44277900  | 3.19786400  | H | -1.89558200 | 2.24093700  | -3.62791900 |
| H  | -1.15800600 | 0.08957500  | 4.25134000  | C | -1.64992300 | 2.11546500  | -2.54444300 |
| H  | 0.52999400  | 0.22004700  | 3.68571700  | O | -2.31909400 | 1.25110300  | -1.92352500 |
| C  | -0.77679900 | -2.31295800 | 2.54494700  | O | -0.73863300 | 2.85283600  | -2.09663100 |
| H  | 0.27211800  | -2.58160900 | 2.70300700  |   |             |             |             |
| H  | -1.31665000 | -2.41775500 | 3.49369700  |   |             |             |             |
| H  | -1.20794700 | -2.99908900 | 1.81027700  |   |             |             |             |
| C  | 2.09735800  | 2.82715200  | -1.41091300 |   |             |             |             |
| C  | 3.03852500  | 3.37545800  | -1.28264300 |   |             |             |             |
| H  | 2.06875700  | 2.37311200  | -2.40502100 |   |             |             |             |
| H  | 1.26458900  | 3.53089100  | -1.33453300 |   |             |             |             |
| C  | 2.09330200  | 2.49020500  | 1.41589000  |   |             |             |             |
| H  | 1.16434700  | 3.02430300  | 1.62753900  |   |             |             |             |
| H  | 2.28701300  | 1.78989700  | 2.23296800  |   |             |             |             |
| C  | 2.91803600  | 3.20868400  | 1.34241700  |   |             |             |             |
| H  | -2.03934000 | -2.10670200 | -2.18382500 |   |             |             |             |
| H  | -1.22351900 | -2.38183000 | -2.85863800 |   |             |             |             |
| H  | -2.05655600 | -2.81043000 | -1.34687800 |   |             |             |             |
| H  | -2.98710100 | -2.17971500 | -2.72951200 |   |             |             |             |
| C  | -2.24007000 | 0.62375800  | -2.95973600 |   |             |             |             |
| H  | -3.20363600 | 0.32589900  | -3.39115400 |   |             |             |             |
| H  | -2.29049800 | 1.67068400  | -2.65079800 |   |             |             |             |
| H  | -1.46048900 | 0.53222000  | -3.72109600 |   |             |             |             |
| C  | 1.99103000  | -1.70025200 | -2.55732400 |   |             |             |             |
| H  | 2.42429500  | -0.73696400 | -2.83782500 |   |             |             |             |
| H  | 2.70468100  | -2.50124600 | -2.78095600 |   |             |             |             |
| H  | 1.08811400  | -1.84098600 | -3.15778900 |   |             |             |             |
| H  | -0.76051300 | 1.41348600  | 0.10128200  |   |             |             |             |
| C  | -1.75910900 | 3.77081800  | -0.14723100 |   |             |             |             |
| O  | -2.74148300 | 3.33795800  | -0.60151100 |   |             |             |             |
| O  | -0.80019000 | 4.25507400  | 0.30469600  |   |             |             |             |

**B8**

**E= -990.57691718 a.u.**

**B7**

**E= -990.59647902 a.u.**

|    |             |             |             |   |             |             |             |
|----|-------------|-------------|-------------|---|-------------|-------------|-------------|
| Rh | 0.13257800  | -0.12206400 | 0.06344700  | C | 0.14605700  | -0.12614700 | -0.30500400 |
| P  | -1.52415200 | -1.63481600 | -0.55172600 | P | 1.58961300  | 1.68921700  | -0.10942800 |
| P  | -1.48054800 | 1.18865900  | 1.15256500  | P | 1.80649100  | -1.80378800 | -0.01137400 |
| C  | -3.31182000 | -1.20435100 | -0.31741000 | C | 3.33333700  | 1.23885000  | -0.62386700 |
| H  | -3.59195200 | -0.50902800 | -1.12345000 | H | 3.33914700  | 1.12468900  | -1.72433700 |
| H  | -3.87845500 | -2.13367200 | -0.44155700 | C | 3.96973000  | 2.09909700  | -0.38451500 |
| C  | -3.28916000 | 0.77530300  | 1.03624000  | C | 3.47591900  | -1.19286000 | -0.58737800 |
| H  | -3.74980700 | 1.20885900  | 1.93143500  | H | 4.21851900  | -1.96279000 | -0.34562700 |
| H  | -3.68267700 | 1.29764600  | 0.14977300  | H | 3.44198200  | -1.10431100 | -1.68944300 |
| P  | 1.83055100  | -1.65999000 | -0.16902400 | P | -1.06677300 | -0.18297100 | 1.68998400  |
| P  | 1.75306200  | 1.52679100  | -0.20327200 | P | -1.70780200 | -0.76820400 | -1.47527100 |
| C  | 3.59043900  | -1.03496700 | -0.14963100 | C | -2.91231000 | 0.07361600  | 1.54721200  |
| H  | 3.87127200  | -0.61299700 | -1.13056100 | H | -3.10215900 | 1.13783200  | 1.30915700  |
| C  | 4.23313000  | -1.90625300 | 0.01689100  | H | -3.33439500 | -0.10743400 | 2.54248500  |
| C  | 3.42239900  | 1.27307100  | 0.60682800  | C | -3.40572700 | -0.41414400 | -0.78661700 |
| H  | 3.40194600  | 1.85636100  | 1.53450200  | C | -4.12694800 | -0.97186800 | -1.39562800 |
| H  | 4.18836700  | 1.73269000  | -0.05154400 | H | -3.62467800 | 0.66155400  | -0.92918600 |
| N  | -3.58080400 | -0.65405600 | 1.00858500  | N | 3.88356100  | 0.06141700  | 0.04086900  |
| N  | 3.76495500  | -0.09820400 | 0.94922300  | N | -3.57270300 | -0.82265100 | 0.60476200  |
| C  | -4.95963800 | -0.90699600 | 1.40811500  | C | 5.33384900  | 0.15020900  | 0.14892600  |
| H  | -5.14366900 | -1.98535200 | 1.43270000  | H | 5.60820800  | 1.05825200  | 0.69380000  |
| H  | -5.12745500 | -0.51372300 | 2.41498100  | H | 5.71469600  | -0.70645900 | 0.71256900  |
| H  | -5.69423900 | -0.44222100 | 0.72559800  | H | 5.83847300  | 0.17005400  | -0.83540400 |
| C  | 5.08860900  | -0.16904800 | 1.54635400  | C | -4.98560500 | -0.96125300 | 0.93155300  |
| H  | 5.13278800  | 0.49884300  | 2.41188700  | H | -5.45194600 | -1.68011500 | 0.25173300  |
| H  | 5.28536500  | -1.18705400 | 1.89526400  | H | -5.09564600 | -1.34115900 | 1.95154500  |
| H  | 5.89120600  | 0.12462200  | 0.84446700  | H | -5.53452300 | -0.00344900 | 0.85449600  |
|    |             |             |             | C | -1.07396700 | -1.76752100 | 2.64603300  |
|    |             |             |             | H | -1.32691600 | -2.58670100 | 1.96889500  |
|    |             |             |             | H | -0.07449700 | -1.94145700 | 3.05129600  |
|    |             |             |             | H | -1.79362700 | -1.74507500 | 3.47160400  |
|    |             |             |             | C | 1.73949900  | -3.34294700 | -1.04550800 |
|    |             |             |             | H | 1.56996900  | -3.06126700 | -2.08853200 |
|    |             |             |             | H | 2.65847500  | -3.93771300 | -0.97611500 |
|    |             |             |             | H | 0.89465400  | -3.95627000 | -0.71946600 |
|    |             |             |             | C | 2.32702100  | -2.54826900 | 1.60778600  |
|    |             |             |             | H | 1.50699400  | -3.14141200 | 2.02136900  |
|    |             |             |             | H | 3.20631100  | -3.19439800 | 1.49878200  |
|    |             |             |             | H | 2.56230500  | -1.74044800 | 2.30645700  |
|    |             |             |             | C | -1.95842700 | -0.12872600 | -3.19049000 |
|    |             |             |             | H | -2.87243600 | -0.52225900 | -3.65032600 |
|    |             |             |             | H | -1.99575600 | 0.96206100  | -3.16796600 |
|    |             |             |             | H | -1.09477900 | -0.42640500 | -3.79086200 |
|    |             |             |             | C | -1.90388600 | -2.58766400 | -1.77740300 |
|    |             |             |             | H | -1.00082600 | -2.96603600 | -2.26329800 |
|    |             |             |             | H | -2.00918100 | -3.08656100 | -0.80997900 |
|    |             |             |             | H | -2.77550800 | -2.81925900 | -2.40095100 |
|    |             |             |             | C | 1.98380700  | 2.50879100  | 1.50520200  |
|    |             |             |             | H | 1.08237800  | 2.96457700  | 1.92142700  |
|    |             |             |             | H | 2.34656000  | 1.74777200  | 2.20165200  |
|    |             |             |             | H | 2.75218400  | 3.28176800  | 1.38878200  |
|    |             |             |             | C | 1.44360000  | 3.19479300  | -1.19058500 |
|    |             |             |             | H | 2.37454000  | 3.77474300  | -1.21288700 |
|    |             |             |             | H | 1.18206200  | 2.88370600  | -2.20468900 |



|   |             |             |             |
|---|-------------|-------------|-------------|
| H | 0.65128200  | 3.84455000  | -0.80975200 |
| C | -0.75594200 | 1.01460400  | 3.06519100  |
| H | -0.91682200 | 2.03208300  | 2.70236900  |
| H | -1.41333760 | 0.82715800  | 3.92124200  |
| H | 0.28411800  | 0.92379500  | 3.38814000  |
| O | 0.77982400  | -0.05878200 | -1.77830900 |
| C | -1.91089200 | 3.11906200  | -0.48616000 |
| O | -1.64725100 | 3.34350300  | 0.62828200  |
| O | -2.21419300 | 2.95901700  | -1.59913300 |

**B9**

**E= -990.58104867 a.u.**

|    |             |             |             |
|----|-------------|-------------|-------------|
| Rh | -0.06037200 | -0.07832100 | -0.38031500 |
| P  | -1.89697200 | -1.53364300 | -0.29753100 |
| P  | -1.47689400 | 1.82081700  | 0.31660700  |
| C  | -3.54326200 | -0.74899500 | -0.66486800 |
| H  | -3.56515500 | -0.50429300 | -1.74347100 |
| H  | -4.29818600 | -1.52501700 | -0.49590200 |
| C  | -3.22605300 | 1.62709300  | -0.29985300 |
| C  | -3.79460500 | 2.48567300  | 0.07552900  |
| H  | -3.21299200 | 1.69973000  | -1.40336900 |
| P  | 1.19687900  | -0.48419700 | 1.64854100  |
| P  | 1.82288600  | 0.97878000  | -1.27546400 |
| C  | 2.98753200  | -0.87439800 | 1.31341000  |
| H  | 3.02500500  | -1.84319900 | 0.79076600  |
| H  | 3.46475600  | -0.99950600 | 2.29207800  |
| C  | 3.43993900  | 0.17455900  | -0.84356500 |
| H  | 4.22384300  | 0.75959600  | -1.33801100 |
| C  | 3.44965200  | -0.83793900 | -1.27721600 |
| N  | -3.87292200 | 0.40511200  | 0.16184400  |
| C  | 3.69362000  | 0.18747600  | 0.59683300  |
| N  | -5.31668600 | 0.57907900  | 0.26853100  |
| H  | -5.76525500 | -0.32623800 | 0.68680800  |
| H  | -5.53953300 | 1.40670500  | 0.94783600  |
| H  | -5.79591700 | 0.78703200  | -0.70573700 |
| C  | 5.12474200  | 0.13140700  | 0.87050400  |
| H  | 5.62516500  | 0.97345200  | 0.38331500  |
| H  | 5.29663200  | 0.21790400  | 1.94731400  |
| H  | 5.59183600  | -0.80497000 | 0.51591900  |
| C  | 1.39590700  | 0.88987700  | 2.86999400  |
| H  | 1.68757800  | 1.80671000  | 2.35285600  |
| H  | 0.44571000  | 1.05957600  | 3.38216200  |
| C  | 2.15865200  | 0.64885200  | 3.61755800  |
| H  | -1.18058800 | 3.52599800  | -0.34210900 |
| H  | -1.01786100 | 3.47705200  | -1.42238200 |
| H  | -2.02694900 | 4.19129900  | -0.13746700 |
| H  | -0.28715700 | 3.94835700  | 0.12392800  |
| C  | -1.83928700 | 2.22337400  | 2.08661000  |
| H  | -0.93679100 | 2.60651700  | 2.56890500  |
| H  | -2.63056200 | 2.97623000  | 2.17383400  |
| H  | -2.15623100 | 1.31351900  | 2.60267000  |
| C  | 1.88680100  | 1.01382200  | -3.10715000 |
| H  | 2.84754500  | 1.39318400  | -3.47075700 |
| H  | 1.71550200  | -0.00913900 | -3.44979700 |
| H  | 1.07942800  | 1.65443100  | -3.47156400 |
| C  | 2.21687200  | 2.72698000  | -0.83690900 |
| H  | 1.43967900  | 3.39064300  | -1.21996700 |
| H  | 2.27652100  | 2.83057300  | 0.24871800  |
| C  | 3.17650300  | 3.02352200  | -1.27269600 |
| H  | -2.28133300 | -2.44296800 | 1.25352900  |
| H  | -1.42552700 | -3.07308000 | 1.50142400  |
| H  | -2.45382400 | -1.72608400 | 2.06028000  |
| H  | -3.16973300 | -3.07109600 | 1.13146000  |
| C  | -1.95534500 | -2.87723600 | -1.55299400 |
| H  | -2.93011000 | -3.37666900 | -1.54061900 |
| H  | -1.76158100 | -2.45367400 | -2.54052800 |
| H  | -1.16417600 | -3.59554700 | -1.33144400 |
| C  | 0.79516200  | -1.88350600 | 2.77595600  |
| C  | 0.78812000  | -2.79746300 | 2.17950900  |
| H  | 1.53836900  | -1.96275400 | 3.57635700  |
| H  | -0.19031200 | -1.72929200 | 3.22232300  |
| H  | -0.68386500 | 0.11421600  | -1.82959300 |
| O  | 0.89942500  | -1.90152000 | -1.10354800 |
| C  | 0.93601500  | -2.78055600 | -0.22117200 |
| O  | 1.29351200  | -1.90197300 | -2.27071700 |

**B10**

**E= -991.03308083 a.u.**

|    |             |             |             |
|----|-------------|-------------|-------------|
| Rh | 0.01746900  | 0.29289700  | -0.44961700 |
| P  | -1.96223300 | 1.41094900  | 0.06824600  |
| P  | -1.18529800 | -1.77052000 | -0.65593700 |
| C  | -3.27695600 | 0.40464600  | 0.91184900  |
| H  | -2.95906900 | 0.20707200  | 1.95307900  |
| H  | -4.16228700 | 1.04700800  | 0.96858000  |
| C  | -2.69421500 | -1.90715700 | 0.42112800  |
| H  | -3.18712200 | -2.84747400 | 0.15332000  |
| H  | -2.38381200 | -1.99408400 | 1.47822000  |
| P  | 2.01115100  | -0.50394200 | -1.35227400 |
| O  | 0.92219800  | 0.06946600  | 1.76963000  |
| C  | 2.89390000  | -1.85403700 | -0.39595200 |
| H  | 3.98092400  | -1.65333700 | -0.46057900 |

|   |             |             |             |
|---|-------------|-------------|-------------|
| H | 2.71213700  | -2.78852300 | -0.93761500 |
| C | 2.54963400  | -0.83176400 | 1.78622600  |
| H | 2.77361000  | -1.09533000 | 2.82489800  |
| H | 3.35440300  | -0.15237700 | 1.45813400  |
| N | -3.63067200 | -0.81275100 | 0.19823300  |
| C | 2.45857700  | -2.04226300 | 0.97868900  |
| N | -5.00801600 | -1.21562300 | 0.47840200  |
| H | -5.68926500 | -0.40710500 | 0.20230600  |
| H | -5.26486500 | -2.08773900 | -0.12781600 |
| H | -5.17038800 | -1.46522800 | 1.54063700  |
| C | 3.13344400  | -3.18576800 | 1.58417200  |
| H | 2.72875800  | -3.36226500 | 2.58421300  |
| H | 2.94398100  | -4.08037400 | 0.98374400  |
| H | 4.22465100  | -3.04709800 | 1.66520500  |
| C | 1.91632300  | -1.25857800 | -3.02384400 |
| H | 1.22813200  | -2.10737000 | -3.01373300 |
| H | 1.53352000  | -0.51398100 | -3.72546500 |
| H | 2.89980200  | -1.60063100 | -3.35957700 |
| C | -0.34397200 | -3.36720600 | -0.29486600 |
| H | 0.19780400  | -3.29606300 | 0.65053600  |
| H | -1.05746200 | -4.19628800 | -0.27029100 |
| H | 0.39098000  | -3.56920900 | -1.07925100 |
| C | -1.92775700 | -2.05829200 | -2.31083900 |
| H | -1.16546000 | -1.95452100 | -3.08561300 |
| H | -2.38711500 | -3.04896200 | -2.37906100 |
| H | -2.69209400 | -1.29606500 | -2.47869000 |
| C | 1.38700700  | 1.61528000  | 2.65190400  |
| H | 1.91440500  | 1.39730800  | 3.58560100  |
| H | 2.03059900  | 2.21566700  | 2.00388300  |
| H | 0.49807200  | 2.20442500  | 2.88510400  |
| C | -0.01219700 | -0.87168200 | 3.04808000  |
| H | -1.00054300 | -0.42644100 | 3.18961000  |
| H | -0.14461000 | -1.90189000 | 2.70647400  |
| H | 0.51192300  | -0.87879200 | 4.00853300  |
| C | -2.84393300 | 2.08302000  | -1.38820300 |
| H | -2.17190000 | 2.75391700  | -1.92732600 |
| H | -3.11446900 | 1.25642200  | -2.04818700 |
| C | -3.74691400 | 2.62387200  | -1.09073300 |
| H | -1.87472700 | 2.84733000  | 1.20865500  |
| H | -2.85337100 | 3.32776500  | 1.29976300  |
| H | -1.55283600 | 2.52101600  | 2.20049900  |
| H | -1.15669400 | 3.57341400  | 0.82323900  |
| C | 3.30665800  | 0.77570200  | -1.57609900 |
| H | 3.51820800  | 1.26519700  | -0.62303300 |
| H | 4.22631900  | 0.34571900  | -1.98324600 |
| H | 2.92606100  | 1.53582600  | -2.26220500 |
| H | 0.67671000  | 1.72898900  | -0.49944700 |
| H | -0.37066000 | 0.60925200  | -1.94682800 |
| C | 1.56138300  | 4.21629500  | -0.45401500 |
| O | 2.59709000  | 3.82016800  | -0.09412900 |
| O | 0.52688000  | 4.61992200  | -0.80551600 |

**B11**

**E= -991.02090528 a.u.**

|    |             |             |             |
|----|-------------|-------------|-------------|
| Rh | -0.03844900 | 0.40736300  | -0.38793000 |
| P  | -2.22134800 | 1.01722300  | 0.23523300  |
| C  | -0.73856700 | -1.73241200 | -0.84750600 |
| P  | -3.29570200 | -0.32602200 | 0.92154500  |
| H  | -2.95577300 | -0.56189900 | 1.94747500  |
| H  | -4.30449200 | 0.09044800  | 1.00886000  |
| C  | -2.15633800 | -2.33767700 | 0.18694700  |
| H  | -2.39273600 | -3.33637300 | -0.19467800 |
| H  | -1.82044400 | -2.46137200 | 1.23189400  |
| P  | 2.11886800  | 0.12689400  | -1.30877100 |
| H  | 0.88076000  | 0.10341900  | 1.87238900  |
| C  | 3.29752300  | -1.03793800 | -0.43591100 |
| H  | 4.29892900  | -0.56798400 | -0.45877700 |
| C  | 3.35711800  | -1.94195900 | -1.05159600 |
| H  | 2.69187300  | -0.30884700 | 1.81134500  |
| H  | 3.00607600  | -0.57823500 | 2.82498500  |
| H  | 3.26840700  | 0.58901100  | 1.53636400  |
| N  | -3.33867600 | -1.49938500 | 0.06306400  |
| N  | 2.91431200  | -1.43546700 | 0.90944000  |
| C  | -4.57115300 | -2.26520700 | 0.24969600  |
| H  | -5.43184200 | -1.61765500 | 0.06756900  |
| H  | -4.60862600 | -3.07956200 | -0.47775700 |
| H  | -4.65868500 | -2.69162800 | 1.26270800  |
| C  | 3.85573400  | -2.41709700 | 1.44313700  |
| H  | 3.50225900  | -2.77512800 | 2.41351900  |
| H  | 3.90747900  | -3.27565000 | 0.76723600  |
| H  | 4.87288200  | -2.01014200 | 1.56595600  |
| C  | 2.22140600  | -0.47150900 | -3.04159400 |
| H  | 1.77752000  | -1.46565200 | -3.13342300 |
| H  | 1.66435300  | 0.21593800  | -3.68247800 |
| H  | 3.26064000  | -0.51545600 | -3.37990000 |
| C  | 0.48669800  | -3.08320600 | -0.63776900 |
| H  | 1.08303600  | -2.90366100 | 0.26023500  |
| H  | -0.00994000 | -4.05644400 | -0.58988000 |
| H  | 1.16635600  | -3.09059600 | -1.49423300 |
| C  | -1.39236000 | -1.97735100 | -2.54010700 |
| H  | -0.67332000 | -1.61046900 | -3.27466300 |
| H  | -1.60112900 | -3.03486300 | -2.72626300 |
| H  | -2.31662500 | -1.40435900 | -2.64034600 |

|   |             |             |             |    |             |             |             |
|---|-------------|-------------|-------------|----|-------------|-------------|-------------|
| C | 0.87359200  | 1.59578700  | 2.93957900  | Rh | -1.42321300 | -0.04952500 | 0.27708600  |
| H | 1.63256700  | 1.51407000  | 3.72324100  | P  | -0.88517900 | 1.99800300  | 1.27618500  |
| H | 1.06128300  | 2.47098500  | 2.31317600  | P  | -1.69723300 | 1.01720100  | -1.73670800 |
| H | -0.10073600 | 1.71682300  | 3.41682000  | C  | -1.77326400 | 3.47859500  | 0.60595000  |
| C | 0.25345800  | -1.23418600 | 2.96995500  | H  | -2.83769100 | 3.41401000  | 0.90026500  |
| H | -0.81964100 | -1.10578400 | 3.13530300  | H  | -1.35270900 | 4.35611800  | 1.10783300  |
| H | 0.42011900  | -2.20630300 | 2.49779500  | C  | -2.41610700 | 2.72686200  | -1.61839800 |
| H | 0.75992400  | -1.21953000 | 3.93956000  | H  | -2.45703900 | 3.10238900  | -2.64635400 |
| C | -3.20158700 | 1.68375300  | -1.15833200 | H  | -3.45744500 | 2.66012600  | -1.25677600 |
| H | -2.66750000 | 2.53068400  | -1.59565700 | P  | -1.46111100 | -2.22388600 | -0.63851100 |
| H | -3.31630600 | 0.90978800  | -1.91963300 | P  | -3.78852900 | -0.24126300 | 0.97262900  |
| H | -4.18693800 | 2.01604300  | -0.81967300 | C  | -3.08366300 | -2.84449200 | -1.34005500 |
| C | -2.32467400 | 2.30866100  | 1.52824600  | H  | -3.18826000 | -3.90627100 | -1.04750100 |
| H | -3.32584600 | 2.74719300  | 1.54853900  | H  | -2.98344900 | -2.82434900 | -2.43080600 |
| H | -2.11425900 | 1.86757600  | 2.50521900  | C  | -4.44742400 | -1.90095400 | 0.45917400  |
| H | -1.58383100 | 3.08533700  | 1.32555200  | H  | -5.51477100 | -1.93910900 | 0.70069900  |
| C | 3.03640400  | 1.71037800  | -1.37852600 | H  | -3.96423300 | -2.69097300 | 1.05372900  |
| H | 3.04592300  | 2.18660400  | -0.39646800 | N  | -1.59602100 | 3.63444800  | -0.83046400 |
| H | 4.05769400  | 1.54164500  | -1.73073600 | N  | -4.25803000 | -2.06432000 | -0.98219800 |
| H | 2.52794200  | 2.39009100  | -2.06567600 | C  | -1.78156500 | 5.02403000  | -1.24635500 |
| H | -0.02703900 | 3.06635000  | -1.89303000 | H  | -1.09044400 | 5.66473800  | -0.69374300 |
| H | -0.49601000 | 0.71918000  | -1.85800600 | H  | -1.55136800 | 5.12334300  | -2.30992400 |
| C | 0.19244200  | 3.39306500  | -0.85270400 | H  | -2.80932200 | 5.38511400  | -1.07361100 |
| O | 0.19597800  | 4.57089800  | -0.55717900 | C  | -5.44428600 | -2.57249100 | -1.66437900 |
| O | 0.43431700  | 2.42198800  | -0.01320200 | H  | -6.30000600 | -1.92989000 | -1.44176000 |
|   |             |             |             | H  | -5.27980500 | -2.54931100 | -2.74587200 |
|   |             |             |             | H  | -5.69534300 | -3.60658300 | -1.37520200 |
|   |             |             |             | C  | -0.29558800 | -2.55735000 | -2.01820800 |
|   |             |             |             | H  | -0.53867000 | -1.93695000 | -2.88433300 |
|   |             |             |             | H  | 0.71605800  | -2.30074900 | -1.69306300 |
|   |             |             |             | H  | -0.32715500 | -3.60991500 | -2.31384900 |
|   |             |             |             | C  | -2.82817100 | 0.22525400  | -2.94828800 |
|   |             |             |             | H  | -3.70259200 | -0.17771900 | -2.43123700 |
|   |             |             |             | H  | -3.12552500 | 0.93685800  | -3.72373200 |
|   |             |             |             | H  | -2.31018400 | -0.60739300 | -3.43136900 |
|   |             |             |             | C  | -0.16060100 | 1.33457000  | -2.67751600 |
|   |             |             |             | H  | 0.52449400  | 0.48810200  | -2.59067900 |
|   |             |             |             | H  | -0.37941000 | 1.55072000  | -3.72720700 |
|   |             |             |             | H  | 0.32365500  | 2.20438000  | -2.22628700 |
|   |             |             |             | C  | -4.07896600 | -0.24044600 | 2.78522200  |
|   |             |             |             | H  | -5.02346100 | -0.73525000 | 3.03040000  |
|   |             |             |             | H  | -3.24371400 | -0.75221900 | 3.26950700  |
|   |             |             |             | H  | -4.12767800 | 0.78718600  | 3.15393000  |
|   |             |             |             | C  | -5.11341300 | 0.86321900  | 0.32627700  |
|   |             |             |             | H  | -4.88750400 | 1.90446200  | 0.57128300  |
|   |             |             |             | H  | -5.17624500 | 0.76465700  | -0.76082000 |
|   |             |             |             | H  | -6.08464600 | 0.60775800  | 0.76071900  |
|   |             |             |             | C  | 0.87708900  | 2.44952700  | 1.10018700  |
|   |             |             |             | H  | 1.49910000  | 1.59607200  | 1.38337600  |
|   |             |             |             | H  | 1.06799400  | 2.66685200  | 0.04761200  |
|   |             |             |             | H  | 1.12946000  | 3.32371900  | 1.70725500  |
|   |             |             |             | C  | -1.22677500 | 2.12638000  | 3.07065600  |
|   |             |             |             | H  | -0.85614600 | 3.07999900  | 3.45736700  |
|   |             |             |             | H  | -2.30031300 | 2.05479000  | 3.25393400  |
|   |             |             |             | H  | -0.74021200 | 1.30700000  | 3.60205500  |
|   |             |             |             | C  | -1.01617700 | -3.49462900 | 0.60257600  |
|   |             |             |             | H  | -1.64920200 | -3.39100600 | 1.48566400  |
|   |             |             |             | H  | -1.11465400 | -4.49458700 | 0.17108100  |
|   |             |             |             | H  | 0.01288600  | -3.33922100 | 0.93123000  |
|   |             |             |             | H  | 0.84344700  | -0.51541400 | 2.17620100  |
|   |             |             |             | H  | 0.09679400  | -0.10877800 | -0.08123300 |
|   |             |             |             | C  | 0.03780200  | -1.06994800 | 2.70008500  |
|   |             |             |             | O  | 0.27562200  | -1.70372500 | 3.71316600  |
|   |             |             |             | O  | -1.13617700 | -0.98300700 | 2.14103800  |
|   |             |             |             | P  | 3.17462800  | -0.07827100 | -0.76169500 |
|   |             |             |             | N  | 4.13056200  | -1.28000100 | -1.59732800 |
|   |             |             |             | N  | 2.99473700  | -0.66539000 | 0.87946700  |
|   |             |             |             | N  | 4.03748200  | 1.41639300  | -0.62959000 |
|   |             |             |             | C  | 2.65440800  | -2.07999100 | 0.93267100  |
|   |             |             |             | C  | 1.87959800  | -2.29535500 | 0.18849900  |
|   |             |             |             | H  | 3.45588200  | 2.52436600  | -1.37676400 |
|   |             |             |             | H  | 4.16332200  | 2.91747500  | -2.11943100 |
|   |             |             |             | C  | 3.65592300  | -1.52587400 | -2.95590600 |
|   |             |             |             | C  | 2.59035500  | -1.29237100 | -3.03233100 |
|   |             |             |             | C  | 5.20086000  | 1.84940200  | 0.14756200  |
|   |             |             |             | H  | 4.88323400  | 2.24320700  | 1.12465900  |
|   |             |             |             | H  | 5.65284400  | 2.70024200  | -0.37815400 |
|   |             |             |             | C  | 6.30631700  | 0.80474200  | 0.33826500  |
|   |             |             |             | H  | 6.85644600  | 0.70241200  | -0.60128300 |
|   |             |             |             | H  | 7.01799600  | 1.21018100  | 1.07885900  |
|   |             |             |             | C  | 3.75782200  | -0.19472200 | 2.02387400  |
|   |             |             |             | H  | 3.70211100  | 0.89658200  | 2.05010900  |
|   |             |             |             | H  | 3.26068300  | -0.55220300 | 2.93509500  |
|   |             |             |             | C  | 5.23018900  | -0.65480000 | 2.01792900  |
|   |             |             |             | H  | 5.78844600  | -0.09616300 | 2.78614000  |
|   |             |             |             | C  | 5.28292400  | -1.71100800 | 2.30178200  |
|   |             |             |             | H  | 5.57213700  | -1.48972200 | -1.52417400 |
|   |             |             |             | H  | 6.09897100  | -0.68391000 | -2.06513200 |
|   |             |             |             | H  | 5.80869200  | -2.41799000 | -2.06090600 |
|   |             |             |             | C  | 6.13340900  | -1.62265000 | -0.11413000 |
|   |             |             |             | H  | 5.71105100  | -2.51652000 | 0.35321500  |
|   |             |             |             | H  | 7.22082800  | -1.79227000 | -0.20585600 |
|   |             |             |             | N  | 5.82769900  | -0.49131000 | 0.72235300  |
|   |             |             |             | H  | 3.49849200  | -2.74804400 | 0.71310900  |
|   |             |             |             | H  | 2.25885500  | -2.32601400 | 1.92342000  |

**B12**

**E= -801.57032153 a.u.**

|    |             |             |             |  |  |  |  |
|----|-------------|-------------|-------------|--|--|--|--|
| Rh | -0.13730200 | 0.02507500  | -0.51553000 |  |  |  |  |
| P  | -2.10374100 | 1.33748700  | -0.33630000 |  |  |  |  |
| P  | -0.94719900 | -1.25962400 | 1.11369800  |  |  |  |  |
| C  | -3.56397600 | 0.43348100  | 0.37509500  |  |  |  |  |
| H  | -3.61616500 | 0.59503000  | 1.46571700  |  |  |  |  |
| H  | -4.45951700 | 0.89528500  | -0.05125800 |  |  |  |  |
| C  | -2.72817600 | -1.76703500 | 0.91035800  |  |  |  |  |
| H  | -2.69888300 | -2.79423500 | 0.53295100  |  |  |  |  |
| H  | -3.16178400 | -1.79914500 | 1.92774100  |  |  |  |  |
| P  | 1.71796900  | -1.26615000 | -1.23468800 |  |  |  |  |
| P  | 1.51117500  | 1.73277100  | 0.23426400  |  |  |  |  |
| C  | 3.15507100  | -1.35054300 | -0.05655800 |  |  |  |  |
| H  | 4.08648500  | -1.35711800 | -0.65344700 |  |  |  |  |
| H  | 3.08900800  | -2.32690000 | 0.43512600  |  |  |  |  |
| C  | 3.22714400  | 1.02859900  | 0.39594400  |  |  |  |  |
| H  | 3.78054700  | 1.68714900  | 1.07197300  |  |  |  |  |
| H  | 3.75892900  | 1.06450700  | -0.56790600 |  |  |  |  |
| N  | -3.49840500 | -0.96290700 | -0.01023100 |  |  |  |  |
| N  | -3.15098900 | -0.31518300 | 0.96531300  |  |  |  |  |
| C  | -4.80672700 | -1.56221500 | -0.29330000 |  |  |  |  |
| H  | -5.30962600 | -0.97958900 | -1.06767000 |  |  |  |  |
| H  | -4.66375600 | -2.57421900 | -0.67844900 |  |  |  |  |
| H  | -5.45435200 | -1.60824100 | 0.59473500  |  |  |  |  |
| C  | 4.20246700  | -0.56516800 | 1.95887600  |  |  |  |  |
| H  | 4.13696600  | 0.18101100  | 2.75360300  |  |  |  |  |
| H  | 4.05180700  | -1.54944500 | 2.40886100  |  |  |  |  |
| H  | 5.21246500  | -0.53038000 | 1.52357600  |  |  |  |  |
| C  | 1.52638100  | -2.99692500 | -1.80102400 |  |  |  |  |
| H  | 1.28118000  | -3.66300300 | -0.97340100 |  |  |  |  |
| H  | 0.72976600  | -3.04718800 | -2.54668500 |  |  |  |  |
| C  | 2.45901100  | -3.34192200 | -2.25677300 |  |  |  |  |
| H  | -0.80989600 | -0.37489000 | 2.70866900  |  |  |  |  |
| H  | -1.27650400 | 0.61079000  | 2.66206000  |  |  |  |  |
| H  | -1.28956800 | -0.96145000 | 3.49795300  |  |  |  |  |
| H  | 0.24886200  | -0.25826400 | 2.94964800  |  |  |  |  |
| C  | -0.09047400 | -2.83581800 | 1.43719400  |  |  |  |  |
| H  | 0.96823100  | -2.64518800 | 1.62778600  |  |  |  |  |
| H  | -0.52762300 | -3.30146700 | 2.32605000  |  |  |  |  |
| H  | -0.20834800 | -3.51559400 | 0.59254900  |  |  |  |  |
| C  | 1.73188100  | 3.19835400  | -0.85441800 |  |  |  |  |
| C  | 2.55928300  | 3.82123000  | -0.50273400 |  |  |  |  |
| H  | 1.93556000  | 2.89339000  | -1.88395100 |  |  |  |  |
| H  | 0.82270200  | 3.80487200  | -0.85482600 |  |  |  |  |
| C  | 1.26603000  | 2.45881000  | 1.90334500  |  |  |  |  |
| H  | 0.26245800  | 2.87112400  | 2.01409100  |  |  |  |  |
| H  | 1.41797700  | 1.68496100  | 2.65869000  |  |  |  |  |
| H  | 1.99354500  | 3.25829400  | 2.07041400  |  |  |  |  |
| C  | -2.59786700 | 1.68785700  | -2.06539600 |  |  |  |  |
| H  | -1.78962800 | 2.19173500  | -2.60167600 |  |  |  |  |
| H  | -2.82024800 | 0.74256400  | -2.56568100 |  |  |  |  |
| H  | -3.48354500 | 2.32952400  | -2.08503900 |  |  |  |  |
| C  | -2.15530500 | 2.95495300  | 0.52357100  |  |  |  |  |
| H  | -3.13663600 | 3.41783100  | 0.38335300  |  |  |  |  |
| H  | -1.98744100 | 2.82523300  | 1.59558000  |  |  |  |  |
| H  | -1.39708400 | 3.63257800  | 0.12496900  |  |  |  |  |
| C  | 2.33319800  | -0.43327000 | -2.75558400 |  |  |  |  |
| H  | 2.55777600  | 0.62025100  | -2.57772500 |  |  |  |  |
| H  | 3.23862100  | -0.92818100 | -3.11825400 |  |  |  |  |
| H  | 1.56884600  | -0.49760900 | -3.53477100 |  |  |  |  |
| H  | -1.08037500 | -1.05434700 | -1.15915800 |  |  |  |  |

**B13**

**E= -1572.00849465 a.u.**

|   |            |             |             |
|---|------------|-------------|-------------|
| H | 3.79535700 | -2.58198100 | -3.21846900 |
| H | 4.18979700 | -0.91910600 | -3.70535400 |
| H | 2.56280800 | 2.18893800  | -1.90877400 |
| H | 3.17284000 | 3.35492100  | -0.71216400 |

|   |             |             |             |
|---|-------------|-------------|-------------|
| C | -5.56964300 | -1.06773600 | -1.80023400 |
| H | -5.77951900 | -0.08539600 | -2.23128000 |
| H | -6.26908600 | -1.77837000 | -2.27443700 |
| N | -5.74780600 | -0.97880200 | -0.37438000 |
| H | -4.87807200 | 1.83105900  | -1.74566200 |
| H | -4.50051000 | 3.14936700  | -0.61261800 |
| H | -1.65588900 | -2.21247900 | -2.05796600 |
| H | -0.96624300 | -0.63250000 | -1.61807500 |
| H | -1.47707200 | -0.71592900 | 2.12265000  |
| H | -2.85954200 | -0.60263500 | 3.25002500  |

**B14**

**E= -1572.00955752 a.u. Rh**

|    |             |             |             |
|----|-------------|-------------|-------------|
| Rh | 1.76207300  | 0.30656700  | -0.47974900 |
| P  | 0.74504500  | 2.24816800  | -1.04082700 |
| P  | 2.00505900  | 0.85859300  | 1.75363400  |
| C  | -0.48265400 | 2.93405200  | 0.23696200  |
| H  | -0.25256400 | 3.95437600  | 0.55689800  |
| H  | -1.48689600 | 2.91484600  | -0.18998900 |
| C  | 0.73092200  | 2.15076000  | 2.27274900  |
| H  | 0.46327600  | 2.02277200  | 3.32399300  |
| H  | 1.14339000  | 3.15538400  | 2.14904700  |
| P  | 1.47956700  | -2.01104000 | -0.22560100 |
| P  | 4.05283600  | -0.00072300 | -1.10323000 |
| C  | 2.91926500  | -2.82263000 | 0.68115900  |
| C  | 3.14227400  | -3.79229000 | 0.19314000  |
| H  | 2.55761900  | -3.05654900 | 1.68867500  |
| C  | 4.71091000  | -1.64387300 | -0.47498300 |
| H  | 5.79649600  | -1.55669800 | -0.36055800 |
| H  | 4.54210800  | -2.42334100 | -1.23832300 |
| N  | -0.53340300 | 2.07561700  | 1.46265900  |
| N  | 4.11948500  | -2.00448500 | 0.81566900  |
| C  | -1.73502600 | 2.37975600  | 2.28995700  |
| C  | -2.62944000 | 2.25967300  | 1.67153800  |
| H  | -1.76905100 | 1.67701100  | 3.12391200  |
| H  | -1.64876900 | 3.39997200  | 2.66778600  |
| C  | 5.08283800  | -2.66061900 | 1.69360000  |
| H  | 5.94455500  | -2.00587500 | 1.85046900  |
| H  | 4.62169400  | -2.85000700 | 2.66810500  |
| H  | 5.44518300  | -3.62383600 | 1.29323800  |
| C  | 0.09041900  | -2.88880000 | 0.62982600  |
| H  | 0.07942900  | -2.61694900 | 1.68823700  |
| H  | -0.86270300 | -2.58092200 | 0.19186800  |
| H  | 0.19091100  | -3.97657500 | 0.54813400  |
| C  | 3.49769800  | 1.70277500  | 2.44085300  |
| C  | 3.81119500  | 2.50700700  | 1.77103200  |
| H  | 3.33198000  | 2.10139300  | 3.44707700  |
| H  | 4.30022300  | 0.96178100  | 2.48810200  |
| C  | 1.73617900  | -0.39348100 | 3.08746900  |
| C  | 2.50171200  | -1.16490900 | 2.97049000  |
| H  | 1.82323800  | 0.04267200  | 4.08760700  |
| C  | 0.75356900  | -0.85985700 | 2.97877300  |
| C  | 4.46291000  | -0.14210100 | -2.89798700 |
| H  | 5.49229300  | -0.47565300 | -3.06678600 |
| H  | 3.76979100  | -0.83992900 | -3.37442400 |
| H  | 4.32588000  | 0.83456200  | -3.37017800 |
| C  | 5.41671600  | 1.12047100  | -0.53916000 |
| H  | 5.17172300  | 2.15703900  | -0.78616300 |
| H  | 5.52579400  | 1.04382700  | 0.54510600  |
| H  | 6.37233900  | 0.85960600  | -1.00657300 |
| C  | -0.32700800 | 2.33689800  | -2.53888200 |
| C  | 0.28898500  | 2.09640100  | -3.40890800 |
| H  | -1.11017100 | 1.57856200  | -2.46270800 |
| H  | -0.77620600 | 3.32562300  | -2.67809200 |
| C  | 1.77517800  | 3.77066300  | -1.27831300 |
| H  | 1.18449900  | 4.66178700  | -1.51722600 |
| H  | 2.36326000  | 3.95336200  | -0.37392200 |
| C  | 2.47738400  | 3.58035000  | -2.09458100 |
| H  | 1.50531000  | -2.93627700 | -1.82390400 |
| H  | 2.39745400  | -2.65655400 | -2.38913500 |
| H  | 1.50017500  | -4.02005000 | -1.66996500 |
| H  | 0.63521100  | -2.64777500 | -2.41748600 |
| H  | 1.39141600  | -0.03308700 | -1.98928200 |
| H  | -0.62755400 | 1.11060500  | 1.07194000  |
| P  | -2.92609000 | -0.04780700 | 0.01467700  |
| C  | -3.08270700 | -0.71495000 | -1.57043200 |
| N  | -4.11060900 | 1.24194700  | 0.16998000  |
| N  | -3.32779400 | -1.19547500 | 1.25432800  |
| C  | -4.18432900 | 2.15744700  | -0.95793700 |
| C  | -3.20189400 | 2.25329400  | -1.43137200 |
| C  | -2.43396400 | -1.16639500 | 2.40284600  |
| H  | -2.22847700 | -2.18526100 | 2.75498700  |
| C  | -1.79704500 | -1.12235700 | -2.13564500 |
| C  | -1.74812300 | -0.85784000 | -3.19981100 |
| C  | -4.56908600 | -1.89084800 | 1.59688600  |
| H  | -5.09959700 | -1.34439400 | 2.39391300  |
| H  | -4.30206500 | -2.86398900 | 2.03104600  |
| C  | -5.52390600 | -2.14570000 | 0.43239700  |
| C  | -5.10877300 | -2.93215800 | -0.20302900 |
| H  | -6.46145600 | -2.54497900 | 0.85667700  |
| C  | -5.34871200 | 1.08414200  | 0.91423500  |
| H  | -5.10577100 | 0.68879900  | 1.90473400  |
| C  | -5.78481100 | 2.07802500  | 1.07712900  |
| C  | -6.38071800 | 0.16895700  | 0.21398700  |
| C  | -7.15060400 | -0.13267400 | 0.93989400  |
| H  | -6.89947300 | 0.73026900  | -0.57034000 |
| C  | -4.15829200 | -1.48821400 | -2.18377100 |
| H  | -4.00993700 | -2.55867800 | -1.96237400 |
| H  | -4.06227000 | -1.39291800 | -3.27347500 |

**B15**

**E= -802.45587685 a.u.**

|    |             |             |             |
|----|-------------|-------------|-------------|
| Rh | -0.21276000 | 0.28069700  | -0.45363400 |
| P  | -2.29312300 | 1.20218800  | -0.53911900 |
| P  | -0.57508000 | -0.62503300 | 1.67408800  |
| C  | -3.50087600 | -0.06989600 | 0.21529200  |
| H  | -3.77720400 | 0.19904900  | 1.23696300  |
| H  | -4.41268800 | -0.15838400 | -0.37825400 |
| C  | -2.13896100 | -1.69745100 | 1.52263900  |
| H  | -1.83460900 | -2.74685900 | 1.49674700  |
| H  | -2.85794100 | -1.55890700 | 2.33407700  |
| P  | 1.16691800  | -1.39611600 | -1.27397300 |
| P  | 1.62914900  | 1.74108100  | 0.01280700  |
| C  | 2.79908600  | -1.57668700 | -0.35197700 |
| H  | 3.59280400  | -1.78003400 | -1.09777200 |
| C  | 2.71221500  | -2.47742800 | 0.26620300  |
| C  | 3.24609000  | 0.82195200  | -0.15508000 |
| H  | 4.04029300  | 1.42200400  | 0.30200200  |
| H  | 3.50859800  | 0.71991800  | -1.22118400 |
| N  | -2.79264800 | -1.38921100 | 0.21921700  |
| N  | 3.15781500  | -0.47122100 | 0.52679100  |
| C  | -3.58559800 | -2.50846800 | -0.33415000 |
| H  | -3.94077300 | -2.22888400 | -1.32733400 |
| H  | -2.94249000 | -3.38632300 | -0.41677100 |
| H  | -4.43402700 | -2.72955700 | 0.31610000  |
| C  | 4.36768100  | -0.79116000 | 1.27670400  |
| H  | 4.57643600  | 0.00310600  | 1.99859400  |
| H  | 4.21766300  | -1.72166000 | 1.83306400  |
| H  | 5.25343300  | -0.91848300 | 0.63051500  |
| C  | 0.66579600  | -3.17697100 | -1.35011800 |
| C  | 0.31606200  | -3.51618300 | -0.37066000 |
| H  | -0.15717100 | -3.27391000 | -2.06370100 |
| H  | 1.48926400  | -3.82265000 | -1.67362100 |
| C  | -1.00982600 | 0.42639200  | 3.12737800  |
| H  | -1.83689800 | 1.09341900  | 2.87318100  |
| H  | -1.28513100 | -0.17119700 | 4.00166700  |
| C  | -0.14847600 | 1.04873900  | 3.38210500  |
| H  | 0.59351800  | -1.81940200 | 2.44798800  |
| H  | 1.54836200  | -1.30298200 | 2.58125600  |
| H  | 0.23404100  | -2.19847000 | 3.40886600  |
| H  | 0.76623300  | -2.65791500 | 1.76868900  |
| C  | 1.93904500  | 3.20045900  | -1.07051700 |
| H  | 2.90270400  | 3.67617600  | -0.86088000 |
| H  | 1.90913800  | 2.88269400  | -2.11592000 |
| H  | 1.14297500  | 3.93511000  | -0.92181300 |
| C  | 1.86359100  | 2.46326300  | 1.69806700  |
| H  | 0.96909100  | 3.01853600  | 1.99279500  |
| H  | 2.01681800  | 1.64540600  | 2.40908800  |
| C  | 2.72889100  | 3.13315000  | 1.73951000  |
| H  | -3.06826000 | 1.52629500  | -2.17940900 |
| H  | -2.47688600 | 2.29113800  | -2.68919200 |
| H  | -3.02232800 | 0.61808600  | -2.78450600 |
| H  | -4.10299400 | 1.87104200  | -2.09130100 |
| C  | -2.80985100 | 2.71900100  | 0.37990800  |
| H  | -3.89060400 | 2.88836900  | 0.34045300  |
| H  | -2.48573200 | 2.66031200  | 1.42142000  |
| H  | -2.30549500 | 3.57513800  | -0.07695800 |
| C  | 1.74187900  | -1.15134400 | -3.00730900 |
| H  | 2.20088400  | -0.16450600 | -3.10226400 |
| H  | 2.46166700  | -1.91800200 | -3.31028500 |
| H  | 0.87550700  | -1.17825800 | -3.67223100 |
| H  | -0.15762000 | 0.76185100  | -1.96509200 |
| H  | -1.91384200 | -1.16866400 | -0.42564200 |

**B16**

**E= -1383.44759894 a.u.**

|    |             |             |             |
|----|-------------|-------------|-------------|
| Rh | 1.76207300  | 0.30656700  | -0.47974900 |
| P  | 0.74504500  | 2.24816800  | -1.04082700 |
| P  | 2.00505900  | 0.85859300  | 1.75363400  |
| C  | -0.48265400 | 2.93405200  | 0.23696200  |
| H  | -0.25256400 | 3.95437600  | 0.55689800  |
| H  | -1.48689600 | 2.91484600  | -0.18998900 |
| C  | 0.73092200  | 2.15076000  | 2.27274900  |
| H  | 0.46327600  | 2.02277200  | 3.32399300  |
| H  | 1.14339000  | 3.15538400  | 2.14904700  |
| P  | 1.47956700  | -2.01104000 | -0.22560100 |
| C  | 4.05283600  | -0.00072300 | -1.10323000 |
| P  | 2.91926500  | -2.82263000 | 0.68115900  |
| H  | 3.14227400  | -3.79229000 | 0.19314000  |

|   |             |             |             |   |             |             |             |
|---|-------------|-------------|-------------|---|-------------|-------------|-------------|
| H | 2.55761900  | -3.05654900 | 1.68867500  | H | -4.74992300 | -1.83406800 | 1.55107100  |
| C | 4.71091000  | -1.64387300 | -0.47498300 | H | -4.88213300 | -2.86114100 | 0.10519900  |
| H | 5.79649600  | -1.55669800 | -0.36055800 | P | -1.65764200 | 1.15968400  | 1.79780600  |
| H | 4.54210800  | -2.42334100 | -1.23832300 | P | -1.23316200 | 1.67197700  | -1.54261300 |
| N | -0.53340300 | 2.07561700  | 1.46265900  | C | -2.61194500 | 2.76074200  | 1.52686600  |
| C | 4.11948500  | -2.00448500 | 0.81566900  | H | -2.10410600 | 3.56677800  | 2.09316600  |
| N | -1.73502600 | 2.37975600  | 2.28995700  | H | -3.59476600 | 2.62115200  | 1.99200200  |
| H | -2.62944000 | 2.25967300  | 1.67153800  | C | -1.59432300 | 3.26643100  | -0.63757600 |
| H | -1.76905100 | 1.67701100  | 3.12391200  | H | -1.70901500 | 4.06491100  | -1.37897900 |
| H | -1.64876900 | 3.39997200  | 2.66778600  | H | -0.72900200 | 3.54528800  | -0.01355300 |
| C | 5.08283800  | -2.66061900 | 1.69360000  | N | -2.96429600 | -2.78725600 | 1.01234700  |
| H | 5.94455500  | -2.00587500 | 1.85046900  | N | -2.82924200 | 3.13770500  | 0.13715200  |
| H | 4.62169400  | -2.85000700 | 2.66810500  | C | -3.03678700 | -3.58408800 | 2.25550300  |
| H | 5.44518300  | -3.62383600 | 1.29323800  | H | -2.03545700 | -3.94259800 | 2.49961100  |
| C | 0.09041900  | -2.88880000 | 0.62982600  | H | -3.39520600 | -2.94216700 | 3.06212100  |
| H | 0.07942900  | -2.61694900 | 1.68823700  | H | -3.71380600 | -4.43026400 | 2.12443100  |
| H | -0.86270300 | -2.58099200 | 0.19186800  | C | -3.66843600 | 4.32735000  | 0.05769000  |
| H | 0.19091100  | -3.97657500 | 0.54813400  | C | -3.88851800 | 4.55343200  | -0.98311900 |
| C | 3.49769800  | 1.70277500  | 2.44085300  | H | -4.61831600 | 4.14107100  | 0.56895300  |
| H | 3.81119500  | 2.50700700  | 1.77103200  | H | -3.20137500 | 5.21605400  | 0.51713700  |
| H | 3.33198000  | 2.10139300  | 3.44707700  | C | -2.42003600 | 0.64477400  | 3.40494900  |
| C | 4.30022300  | 0.96178100  | 2.48810200  | H | -3.44479200 | 0.29876600  | 3.23854900  |
| H | 1.73617900  | -0.39348100 | 3.08746900  | H | -1.83777300 | -0.18394400 | 3.81719100  |
| H | 2.50171200  | -1.16490900 | 2.97049000  | H | -2.43745500 | 1.46141000  | 4.13476400  |
| H | 1.82323800  | 0.04267200  | 4.08760700  | C | -4.55489900 | -1.03163700 | -2.02249600 |
| H | 0.75356900  | -0.85985700 | 2.97877300  | H | -3.97585800 | -1.84805600 | -2.46140900 |
| C | 4.46291000  | -0.14210100 | -2.89798700 | H | -5.60538800 | -1.33015300 | -1.95268500 |
| H | 5.49229300  | -0.47565300 | -3.06678600 | H | -4.47553400 | -0.17198800 | -2.69263000 |
| H | 3.76979100  | -0.83992900 | -3.37442400 | C | -5.14381400 | 0.56880700  | 0.25541900  |
| H | 4.32588000  | 0.83456200  | -3.37017800 | C | -5.01341500 | 1.52992300  | -0.24959500 |
| C | 5.41671600  | 1.12047100  | -0.53916000 | H | -6.15687100 | 0.19144600  | 0.08877800  |
| H | 5.17172300  | 2.15703900  | -0.78616300 | H | -4.98992200 | 0.73709600  | 1.32456800  |
| H | 5.52579400  | 1.04382700  | 0.54510600  | C | 0.40871700  | 2.07450900  | -2.27604500 |
| H | 6.37233900  | 0.85960600  | -1.00657300 | H | 0.42129600  | 3.08008900  | -2.70969900 |
| C | -0.32700800 | 2.33689800  | -2.53888200 | H | 1.18544100  | 1.99365300  | -1.50925300 |
| H | 0.28898500  | 2.09640100  | -3.40890800 | H | 0.63904200  | 1.35309900  | -3.06428300 |
| H | -1.11017100 | 1.57856200  | -2.46270800 | C | -2.35777800 | 1.89994800  | -2.99363500 |
| C | -0.77620600 | 3.32562300  | -2.67809200 | H | -2.31669900 | 1.01822200  | -3.63885700 |
| H | 1.77517800  | 3.77066300  | -1.27831300 | H | -3.38072000 | 2.01437400  | -2.62172500 |
| H | 1.18449900  | 4.66178700  | -1.51722600 | C | -2.09493200 | 2.78629900  | -3.58097900 |
| H | 2.36326000  | 3.95336200  | -0.37392200 | H | 0.56837100  | -3.08699600 | -0.16396600 |
| H | 2.47738400  | 3.58035000  | -2.09458100 | H | 1.43467100  | -2.46830500 | -0.41496700 |
| C | 1.50531000  | -2.93627700 | -1.82390400 | H | 0.51423800  | -3.13965200 | 0.92643500  |
| H | 2.39745400  | -2.65655400 | -2.38913500 | H | 0.70666800  | -4.09075200 | -0.57795600 |
| H | 1.50017500  | -4.02005000 | -1.66996500 | C | -0.93003600 | -2.80657000 | -2.56853100 |
| H | 0.63521100  | -2.64777500 | -2.41748600 | H | -0.82050700 | -3.88898600 | -2.69129100 |
| H | 1.39141600  | -0.03308700 | -1.98928200 | H | -1.83597600 | -2.46627700 | -3.07618800 |
| H | -0.62755400 | 1.11060500  | 1.07194000  | H | -0.07760200 | -2.31383200 | -3.04433300 |
| P | -2.92609000 | -0.04780700 | 0.01467700  | C | -0.03377700 | 1.79440500  | 2.39410800  |
| N | -3.08270700 | -0.71495000 | -1.57043200 | H | 0.52795100  | 2.19329700  | 1.54611400  |
| N | -4.11060900 | 1.24194700  | 0.16998000  | H | -0.15330000 | 2.56678900  | 3.16025500  |
| N | -3.32779400 | -1.19547500 | 1.25432800  | H | 0.54697300  | 0.96415900  | 2.80199400  |
| C | -4.18432900 | 2.15744700  | -0.95793700 | H | -0.00627100 | -0.11378800 | 0.22869100  |
| C | -3.20189400 | 2.25329400  | -1.43137200 | H | -2.30205800 | -1.90201600 | 1.14796900  |
| C | -2.43396400 | -1.16639500 | 2.40284600  | P | 2.99595200  | 0.18691500  | 0.11970100  |
| C | -2.22847700 | -2.18526100 | 2.75498700  | N | 3.50115700  | -0.50238300 | 1.63688800  |
| N | -1.79704500 | -1.12235700 | -2.13564500 | N | 3.91234500  | 1.64303100  | -0.13895700 |
| C | -1.74812300 | -0.85784000 | -3.19981100 | N | 3.45365000  | -0.86531500 | -1.19661400 |
| C | 4.56908600  | -1.89084800 | 1.59688600  | C | 3.86147200  | 2.61283500  | 0.93861400  |
| H | -5.09959700 | -1.34439400 | 2.39391300  | H | 2.90010500  | 2.53702100  | 1.45756100  |
| H | 4.30206500  | -2.86398900 | 2.03104600  | C | 2.47180100  | -0.86385300 | -2.27325000 |
| C | -5.52390600 | -2.14570000 | 0.43239700  | H | 2.39774900  | -1.86554300 | -2.72098200 |
| C | -5.10877300 | -2.93215800 | -0.20302900 | C | 2.41191600  | -1.19000400 | 2.31877700  |
| H | -6.46145600 | -2.54497900 | 0.85667700  | H | 1.44966900  | -0.88359900 | 1.89807500  |
| C | -5.34871200 | 1.08414200  | 0.91423500  | C | 4.75536100  | -1.30309000 | -1.70101700 |
| H | -5.10577100 | 0.68879900  | 1.90473400  | H | 5.07469000  | -0.65549100 | -2.53416700 |
| H | -5.78481100 | 2.07802500  | 1.07712900  | H | 4.62693800  | -2.30396800 | -2.13859400 |
| C | -6.38071800 | 0.16895700  | 0.21398700  | C | 5.88522100  | -1.38903900 | -0.67402900 |
| H | -7.15060400 | -0.13267400 | 0.93989400  | H | 5.69854700  | -2.23541000 | -0.00814600 |
| H | -6.89947300 | 0.73026900  | -0.57034000 | C | 6.80745700  | -1.62814500 | -1.23264400 |
| C | -4.15829200 | -1.48821400 | -2.18377100 | C | 5.04400200  | 1.73855500  | -1.03946800 |
| H | -4.00993700 | -2.55867800 | -1.96237400 | H | 4.75611000  | 1.30857300  | -2.00248200 |
| C | -4.06227000 | -1.39291800 | -3.27347500 | H | 5.24641100  | 2.80024300  | -1.22879200 |
| H | -5.56964300 | -1.06773600 | -1.80023400 | C | 6.32365600  | 1.04973000  | -0.51017400 |
| H | -5.77951900 | -0.08539600 | -2.23128000 | H | 7.03401600  | 0.91422400  | -1.34011000 |
| H | -6.26908600 | -1.77837000 | -2.27443700 | H | 6.81993200  | 1.70455600  | 0.21418100  |
| N | -5.74780600 | -0.97880200 | -0.37438000 | C | 4.78075600  | -1.02148600 | 2.09721800  |
| H | -4.87807200 | 1.83105900  | -1.74566200 | H | 4.84702000  | -2.10063200 | 1.87194200  |
| H | -4.50051000 | 3.14936700  | -0.61261800 | H | 4.80854900  | -0.94560400 | 3.19370600  |
| H | -1.65588900 | -2.21247900 | -2.05796600 | C | 6.01095600  | -0.30425200 | 1.56118400  |
| H | -0.96624300 | -0.63250000 | -1.61807500 | H | 6.03207200  | 0.71020200  | 1.96877700  |
| H | -1.47707200 | -0.71592900 | 2.12265000  | H | 6.89542800  | -0.82727400 | 1.96762900  |
| H | -2.85954200 | -0.60263500 | 3.25002500  | N | 6.03688800  | -0.20628300 | 0.12564700  |
|   |             |             |             | H | 4.64725100  | 2.47278600  | 1.69730200  |
|   |             |             |             | H | 3.95126400  | 3.62778200  | 0.53366200  |
|   |             |             |             | H | 2.42283100  | -0.95918000 | 3.39320500  |
|   |             |             |             | H | 2.49422100  | -2.28482500 | 2.21267600  |
|   |             |             |             | H | 1.49036200  | -0.58022500 | -1.88057000 |
|   |             |             |             | H | 2.73486400  | -0.16009900 | -3.08057200 |

**B17**

**E= -1383.43758577 a.u.**

|    |             |             |             |
|----|-------------|-------------|-------------|
| Rh | -1.54641300 | -0.19953700 | -0.07931200 |
| P  | -0.96716800 | -2.28432300 | -0.79569800 |
| P  | -3.84642700 | -0.57595700 | -0.37861000 |
| C  | -2.29398300 | -3.48463000 | -0.13091500 |
| C  | -3.03370900 | -3.72495000 | -0.89712200 |
| H  | -1.85241600 | -4.41552700 | 0.22965500  |
| C  | -4.24927500 | -2.14011600 | 0.62902900  |

**B18**

**E= -990.98884447 a.u.**

|    |            |             |             |
|----|------------|-------------|-------------|
| Rh | 0.09429100 | -0.02006000 | -0.36779900 |
|----|------------|-------------|-------------|

|   |             |             |             |    |             |             |             |
|---|-------------|-------------|-------------|----|-------------|-------------|-------------|
| P | 1.89112400  | -1.21225100 | -1.07953500 | C  | -0.59757300 | -0.54502400 | 3.40299900  |
| P | 0.10640500  | -1.08928300 | 1.71573700  | H  | -0.30334700 | -1.59036600 | 3.27245900  |
| C | 3.13261600  | -1.36550400 | 0.35532100  | H  | 0.26628800  | 0.01476700  | 3.77185600  |
| C | 3.10276400  | -2.35651200 | 0.81319700  | H  | -1.39514300 | -0.49566300 | 4.15187600  |
| H | 4.15013500  | -1.16785200 | 0.01397400  | C  | 0.90754700  | -3.05973800 | -1.78963600 |
| C | 1.85066800  | -0.86771300 | 2.43477200  | H  | 1.76029300  | -2.58813700 | -2.28342400 |
| H | 1.79876600  | -0.11350500 | 3.22376700  | H  | 1.13223400  | -4.11700000 | -1.62012000 |
| H | 2.28088000  | -1.78258500 | 2.85088000  | C  | 0.04948200  | -2.98445000 | -2.46211600 |
| P | -1.11383500 | 1.87385900  | 0.24743300  | H  | -0.67034900 | -3.36314100 | 0.54924700  |
| P | -1.90847600 | -0.93019500 | -1.36587200 | H  | -1.63274600 | -3.23458600 | 0.04583200  |
| C | -2.78515800 | 1.47244200  | 1.01170100  | H  | -0.33870800 | -4.40158700 | 0.46214500  |
| H | -3.49314000 | 2.26776200  | 0.70562500  | H  | -0.81574800 | -3.11671100 | 1.60369700  |
| C | -2.65986600 | 1.56596600  | 2.09615100  | C  | -1.94373100 | 1.98259500  | -2.47980700 |
| C | -3.46422300 | -0.13575000 | -0.69214400 | H  | -2.91476300 | 2.01560800  | -2.98455800 |
| H | -4.29328200 | -0.83553400 | -0.84042500 | H  | -1.87675200 | 2.80165700  | -1.75969000 |
| H | -3.71286600 | 0.76722200  | -1.27648000 | H  | -1.15428800 | 2.12514900  | -3.22290400 |
| N | 2.76444100  | -0.33652300 | 1.38130000  | C  | -1.98254200 | -0.84689400 | -2.94667500 |
| N | -3.32331600 | 0.14587000  | 0.73667800  | H  | -1.12102300 | -0.89795800 | -3.61787100 |
| C | 3.92933600  | 0.38635900  | 1.94617500  | H  | -2.12904500 | -1.82962100 | -2.48788100 |
| H | 4.52467300  | 0.79094800  | 1.12901100  | H  | -2.87385300 | -0.59447300 | -3.53088200 |
| H | 3.56420100  | 1.20780800  | 2.56453500  | C  | 3.10130300  | 2.15658400  | -0.64163400 |
| C | 4.52827500  | -0.29689400 | 2.55089300  | H  | 2.55133900  | 2.93338400  | -1.17972000 |
| C | -4.57631900 | -0.04505700 | 1.46082400  | H  | 3.03706000  | 2.38470300  | 0.42414700  |
| H | -4.93685400 | -1.06665100 | 1.31380900  | C  | 4.14401500  | 2.16974500  | -0.97331500 |
| H | -4.40760800 | 0.10372000  | 2.53209000  | H  | 2.74617600  | 0.30490500  | -2.74978600 |
| C | -5.36689500 | 0.65530700  | 1.14031400  | H  | 3.82653400  | 0.36899300  | -2.91387800 |
| H | -0.55578300 | 3.15854700  | 1.45508900  | H  | 2.37346400  | -0.65301600 | -3.11871000 |
| H | -0.23037900 | 2.68736700  | 2.38617800  | H  | 2.25871500  | 1.09368400  | -3.32989900 |
| O | 0.28986900  | 3.70170300  | 1.02684300  | C  | -1.63808400 | 1.85860600  | 2.34253700  |
| H | -1.35311000 | 3.87605900  | 1.67678700  | H  | -2.07559600 | 2.40449000  | 1.50319800  |
| C | -0.08849500 | -2.91816300 | 1.90590600  | H  | -2.36241600 | 1.81069500  | 3.16133600  |
| H | 0.57848600  | -3.44766500 | 1.22200700  | H  | -0.74937500 | 2.39901900  | 2.67858000  |
| H | 0.11747500  | -3.24463200 | 2.92982800  | H  | 0.18580400  | 1.71083100  | 0.07493800  |
| H | -1.11527100 | -3.19195500 | 1.65294100  | H  | 1.91413900  | -0.53503800 | 1.14914900  |
| C | -0.90428200 | -0.52217600 | 3.14855800  | C  | 0.17879900  | 4.33580600  | 0.64017400  |
| H | -1.95309800 | -0.69339800 | 2.89108300  | O  | -0.71518400 | 4.46432100  | -0.09583700 |
| H | -0.66077300 | -1.06277600 | 4.06785200  | O  | 1.07640900  | 4.21491800  | 1.37350100  |
| C | -0.75962800 | 0.54876100  | 3.30982800  |    |             |             |             |
| C | -2.18848500 | -0.75161500 | -3.18065600 |    |             |             |             |
| H | -3.19752800 | -1.05570100 | -3.47791100 |    |             |             |             |
| H | -2.02140200 | 0.28846300  | -3.47213400 |    |             |             |             |
| H | -1.46250900 | -1.36760200 | -3.71846800 |    |             |             |             |
| C | -2.33227300 | -2.71127000 | -1.10487700 |    |             |             |             |
| H | -1.48474500 | -3.34061800 | -1.38831600 | Rh | 0.00405500  | 0.07687000  | -0.12053600 |
| C | -2.53820500 | -2.86950600 | -0.04280100 | P  | 1.70749900  | -0.70510800 | -1.48233600 |
| H | -3.21241600 | -3.01343000 | -1.68219500 | C  | 0.39371800  | -1.41160700 | 1.69539900  |
| C | 2.95992500  | -0.59634800 | -2.44643500 | P  | 3.28664200  | -0.79787100 | -0.43136000 |
| C | 2.33268600  | -0.46953600 | -3.33231100 | H  | 3.81158500  | -1.75139200 | -0.53467100 |
| H | 3.37276700  | 0.37770100  | -2.18110300 | H  | 3.95188400  | 0.00995000  | -0.74216300 |
| H | 3.77162200  | -1.29278700 | -2.67707600 | C  | 2.26621000  | -1.72769200 | 1.67107500  |
| C | 1.73960700  | -2.98530000 | -1.57958600 | H  | 2.67753400  | -1.85925400 | 2.67532900  |
| H | 2.71271700  | -3.46865100 | -1.71235700 | H  | 2.47574300  | -2.63416700 | 1.09824500  |
| H | 1.14959600  | -3.54499300 | -0.85099600 | P  | -1.44606300 | 1.78274400  | 0.45019100  |
| C | 1.20591700  | -3.01653400 | -2.53417300 | P  | -1.75143200 | -0.89348200 | -1.31118100 |
| H | -1.60092300 | 2.94540300  | -1.17051900 | C  | -3.13697500 | 1.21877500  | 1.03757900  |
| H | -2.06685800 | 2.33760900  | -1.94909600 | H  | -3.87609700 | 1.99512700  | 0.75664800  |
| H | -2.29699000 | 3.73007900  | -0.85882600 | C  | -3.09086200 | 1.19756800  | 2.13218000  |
| H | -0.70342400 | 3.39918300  | -1.59371200 | H  | -3.44775800 | -0.26307400 | -0.86083000 |
| H | 0.41388400  | 0.87836500  | -1.64416600 | H  | -4.17097500 | -1.01295000 | -1.19723100 |
| H | 2.10446000  | 0.32977200  | 0.82136700  | N  | -3.67570300 | 0.66198900  | -1.41893900 |
| C | 2.54569700  | 2.96166500  | -0.91178800 | N  | 2.98609600  | -0.57567800 | 1.01766500  |
| O | 1.73201100  | 3.70275900  | -1.28334200 | C  | -3.55196000 | -0.10076100 | 0.58170300  |
| O | 3.39261300  | 2.25201700  | -0.53187900 | N  | 4.17871100  | -0.13009200 | 1.78135900  |
|   |             |             |             | H  | 4.58062300  | 0.76831300  | 1.31274900  |
|   |             |             |             | H  | 3.87786300  | 0.09390500  | 2.80576400  |
|   |             |             |             | H  | 4.92766000  | -0.92369700 | 1.78000600  |
|   |             |             |             | C  | -4.87766300 | -0.42720300 | 1.09268900  |
|   |             |             |             | H  | -5.13433000 | -1.45632700 | 0.82682700  |
|   |             |             |             | H  | -4.87450100 | -0.35201800 | 2.18384000  |
|   |             |             |             | H  | -5.66340900 | 0.24473100  | 0.70489100  |
|   |             |             |             | C  | -0.98148500 | 2.86502600  | 1.86722600  |
|   |             |             |             | H  | -0.73079900 | 2.24338200  | 2.73012100  |
|   |             |             |             | H  | -0.10169500 | 3.44970900  | 1.58969200  |
|   |             |             |             | H  | -1.79282200 | 3.54919500  | 2.13484400  |
|   |             |             |             | C  | -0.13844200 | -3.16532700 | 1.95544800  |
|   |             |             |             | H  | 0.01505100  | -3.74098700 | 1.03876200  |
|   |             |             |             | H  | 0.38657200  | -3.65231300 | 2.78412600  |
|   |             |             |             | H  | -1.20980600 | -3.16723400 | 2.17504500  |
|   |             |             |             | C  | 0.21867900  | -0.75566200 | 3.41800000  |
|   |             |             |             | H  | -0.84520500 | -0.59586900 | 3.61527300  |
|   |             |             |             | H  | 0.62367000  | -1.42878400 | 4.18119000  |
|   |             |             |             | H  | 0.71550800  | 0.21682100  | 3.48445900  |
|   |             |             |             | C  | -1.78731900 | -0.67999500 | -3.14341000 |
|   |             |             |             | C  | -2.70259100 | -1.08888800 | -3.58308900 |
|   |             |             |             | H  | -1.71349400 | 0.38438400  | -3.38009700 |
|   |             |             |             | H  | -0.92898200 | -1.18387300 | -3.59561600 |
|   |             |             |             | C  | -2.02705600 | -2.70843400 | -1.12450900 |
|   |             |             |             | H  | -1.10149900 | -3.25330800 | -1.32450900 |
|   |             |             |             | H  | -2.32780700 | -2.90384200 | -0.09193600 |
|   |             |             |             | H  | -2.80706400 | -3.07001200 | -1.80161100 |
|   |             |             |             | C  | 2.40985500  | 0.12151000  | -2.97956400 |
|   |             |             |             | H  | 1.64268900  | 0.12229500  | -3.75863500 |
|   |             |             |             | H  | 2.64668900  | 1.16104800  | -2.74342500 |
|   |             |             |             | C  | 3.30347300  | -0.38132800 | -3.36385400 |
|   |             |             |             | H  | 1.64373900  | -2.45399500 | -2.09091700 |
|   |             |             |             | C  | 2.58549500  | -2.76963700 | -2.55051600 |

**B20**

**E= -990.99028936 a.u.**

**B19**

**E= -990.98672439 a.u.**

|    |             |             |             |  |  |  |  |
|----|-------------|-------------|-------------|--|--|--|--|
| Rh | 0.20426500  | 0.13777500  | -0.12619700 |  |  |  |  |
| P  | 2.27885600  | 0.54289500  | -0.97813100 |  |  |  |  |
| P  | 0.51360000  | -2.17834200 | -0.21611600 |  |  |  |  |
| C  | 3.47675100  | -0.68855300 | -0.14494800 |  |  |  |  |
| H  | 3.74194400  | -1.50762000 | -0.81678700 |  |  |  |  |
| H  | 4.39427200  | -0.19265600 | 0.17676700  |  |  |  |  |
| C  | 2.08443500  | -2.52895400 | 0.79797500  |  |  |  |  |
| H  | 1.78390900  | -2.94176000 | 1.76420500  |  |  |  |  |
| C  | 2.78005500  | -3.22326900 | 0.31981100  |  |  |  |  |
| P  | -1.12178100 | 0.18026000  | 1.78205900  |  |  |  |  |
| P  | -1.66651800 | 0.38553800  | -1.60577900 |  |  |  |  |
| C  | -2.78117000 | -0.68867200 | 1.58317600  |  |  |  |  |
| H  | -3.54884100 | -0.09609600 | 2.11870100  |  |  |  |  |
| C  | -2.69656800 | -1.64488600 | 2.11210400  |  |  |  |  |
| C  | -3.25809800 | 0.20519100  | -0.64719800 |  |  |  |  |
| H  | -4.08564400 | 0.09048200  | -1.35572000 |  |  |  |  |
| H  | -3.46019100 | 1.12955400  | -0.08196400 |  |  |  |  |
| N  | 2.77347900  | -1.23334900 | 1.05952400  |  |  |  |  |
| N  | -3.17985800 | -0.97792100 | 0.21305200  |  |  |  |  |
| C  | 3.58881000  | -1.22825500 | 2.29433300  |  |  |  |  |
| C  | 3.97948800  | -0.22183800 | 2.45234700  |  |  |  |  |
| H  | 2.95069800  | -1.50287600 | 3.13608600  |  |  |  |  |
| H  | 4.41274400  | -1.93865400 | 2.20566700  |  |  |  |  |
| C  | -4.40293800 | -1.77236300 | 0.19308200  |  |  |  |  |
| H  | -4.64840600 | -2.04304400 | -0.83739000 |  |  |  |  |
| H  | -4.24771100 | -2.69847700 | 0.75568700  |  |  |  |  |
| H  | -5.26774100 | -1.24570100 | 0.63222700  |  |  |  |  |

|   |             |             |             |
|---|-------------|-------------|-------------|
| H | 1.40203300  | -3.12523400 | -1.26196500 |
| H | 0.85166600  | -2.54970000 | -2.83873500 |
| C | -1.87897400 | 3.05192500  | -0.81981200 |
| H | -2.29338400 | 2.56738200  | -1.70765000 |
| H | -2.60079900 | 3.78242800  | -0.43952300 |
| H | -0.96279100 | 3.56813600  | -1.11540500 |
| H | 1.09613200  | 1.10193400  | 0.55715600  |
| C | 2.26862300  | 0.20626200  | 0.98095100  |
| H | 2.47221500  | 3.19093000  | -0.37902300 |
| O | 3.38734700  | 2.46820800  | -0.29499000 |
| O | 1.58572300  | 3.93567300  | -0.46935800 |

**B21**

**E= -1383.46410563 a.u.**

|    |             |             |             |
|----|-------------|-------------|-------------|
| Rh | 1.58608100  | 0.16348500  | -0.52292100 |
| P  | 0.54452800  | 2.04210600  | -1.24174400 |
| P  | 1.86211000  | 1.15814600  | 1.58001700  |
| C  | -0.65412600 | 2.91059900  | -0.07503800 |
| H  | -0.49743500 | 4.00569400  | -0.15037700 |
| H  | -1.66554900 | 2.70674900  | -0.44051300 |
| C  | 0.73037200  | 2.62245000  | 1.90413800  |
| H  | 0.62590700  | 2.72645700  | 2.98927400  |
| H  | 1.23096300  | 3.54339400  | 1.55169000  |
| P  | 1.48201200  | -2.07226400 | 0.12397800  |
| P  | 3.87473600  | -0.11676600 | -1.17852800 |
| C  | 2.98477400  | -2.61851900 | 1.12485000  |
| C  | 3.25064300  | -3.65418700 | 0.82925500  |
| H  | 2.65861700  | -2.66693600 | 2.17014000  |
| C  | 4.67005600  | -1.57413400 | -0.29606900 |
| H  | 5.74963000  | -1.39942100 | -0.23825300 |
| H  | 4.53688100  | -2.49027100 | -0.89825700 |
| N  | -0.59594900 | 2.46687600  | 1.31240200  |
| N  | 4.13883600  | -1.73204700 | 1.05945900  |
| C  | -1.62652400 | 3.13695800  | 2.09256200  |
| H  | -2.60358100 | 2.93627700  | 1.63964100  |
| H  | -1.63326300 | 2.74523300  | 3.11480900  |
| H  | -1.48598000 | 4.23172700  | 2.14402100  |
| C  | 5.16057800  | -2.15705900 | 2.00738000  |
| H  | 5.98329900  | -1.43646000 | 2.01057500  |
| H  | 4.73499900  | -2.18628300 | 3.01558100  |
| H  | 5.57325400  | -3.15688800 | 1.78142200  |
| C  | 0.18336000  | 2.91765100  | 1.15203100  |
| H  | 0.14214400  | -2.44543000 | 2.13662100  |
| H  | -0.79354700 | -2.79220600 | 0.67422600  |
| C  | 0.38737100  | -3.98675100 | 1.28179200  |
| C  | 3.46236100  | 1.95635500  | 2.04630400  |
| H  | 3.76551600  | 2.66423300  | 1.27066900  |
| H  | 3.39120800  | 2.48170300  | 3.00476600  |
| H  | 4.22295500  | 1.17448100  | 2.12442000  |
| C  | 1.60593500  | 0.15690400  | 3.11650700  |
| H  | 2.37353900  | -0.62155600 | 3.13421500  |
| H  | 1.70126200  | 0.76441900  | 4.02235300  |
| H  | 0.62505600  | -0.32094700 | 3.10560500  |
| C  | 4.21229500  | -0.57885500 | -2.93796100 |
| H  | 5.25118600  | -0.88510800 | -3.10266700 |
| H  | 3.53957300  | -1.38610900 | -3.23808100 |
| C  | 3.99315000  | 0.28389300  | -3.57355200 |
| H  | 5.20525400  | 1.15453100  | -0.94037700 |
| H  | 4.89081500  | 2.09960400  | -1.39197400 |
| H  | 5.36868900  | 1.32366300  | 0.12574800  |
| H  | 6.15061800  | 0.83954400  | -1.39581200 |
| C  | -0.47583600 | 2.00706700  | -2.78526100 |
| H  | 0.18784600  | 1.76853000  | -3.62038900 |
| H  | -1.21734700 | 1.20642500  | -2.72151700 |
| H  | -0.97247800 | 2.96352700  | -2.98313600 |
| C  | 1.65191400  | 3.46912200  | -1.67153700 |
| H  | 1.10117800  | 4.34879900  | -2.02287100 |
| H  | 2.24216900  | 3.74491200  | -0.79247000 |
| H  | 2.34781900  | 3.14334400  | -2.44958900 |
| C  | 1.56211000  | -3.27668600 | -1.28036500 |
| H  | 2.40660900  | -3.02450300 | -1.92543600 |
| H  | 1.66903600  | -4.31003200 | -0.93405700 |
| H  | 0.65551700  | -3.18717700 | -1.88289100 |
| H  | 1.20349400  | -0.41135100 | -1.96741100 |
| H  | -1.73313000 | 0.18346500  | -0.26406500 |
| P  | -3.07514200 | -0.24653600 | -0.15543700 |
| N  | -3.07747600 | -1.19288000 | -1.55038100 |
| N  | -3.90396200 | 1.25082800  | -0.16189700 |
| N  | -3.00040200 | -0.90105600 | 1.39561800  |
| C  | -4.07543900 | 1.92405100  | -1.44797300 |
| H  | -3.17434800 | 1.80918600  | -2.05222900 |
| H  | -1.99375000 | -0.37644500 | 2.31593000  |
| C  | -1.58953500 | -1.20008400 | 2.91216900  |
| C  | -1.79214600 | -1.58771600 | -2.13723300 |
| H  | -1.81408700 | -1.41958400 | -3.21884700 |
| C  | -4.11599400 | -1.56470200 | 2.04888600  |
| H  | -4.62968600 | -0.87292200 | 2.73459100  |
| H  | -3.73646600 | -2.39338400 | 2.65614700  |
| H  | -5.07492100 | -2.09026400 | 0.99261700  |
| C  | -4.64459200 | -2.97420500 | 0.51569100  |
| H  | -6.04027700 | -2.37296900 | 1.42802400  |
| C  | -5.05477400 | 1.27688900  | 0.72564000  |
| H  | -4.70389600 | 1.20031800  | 1.75955500  |

|   |             |             |             |
|---|-------------|-------------|-------------|
| H | -5.56124700 | 2.24008500  | 0.62860300  |
| C | -6.02041100 | 0.11655500  | 0.39535000  |
| H | -6.64708100 | -0.13104400 | 1.25765800  |
| H | -6.68865900 | 0.39899500  | -0.42099700 |
| C | -4.17093700 | -2.07158200 | -1.93493200 |
| H | -3.97113700 | -3.09548200 | -1.58420100 |
| H | -4.23020600 | -2.11830300 | -3.02733200 |
| C | -5.47806000 | -1.53523300 | -1.37629900 |
| H | -5.81016000 | -0.69045600 | -1.98338600 |
| H | -6.26454600 | -2.29911600 | -1.39313300 |
| N | -5.21660100 | -1.04226800 | -0.02156600 |
| H | -4.92355300 | 1.53483400  | -2.02905400 |
| H | -4.23041900 | 2.99253700  | -1.27387700 |
| H | -1.60939600 | -2.65401100 | -1.95256000 |
| H | -0.95555000 | -1.02140400 | -1.71315900 |
| H | -1.18383300 | 0.10851000  | 1.76365800  |
| H | -2.43495100 | 0.36494300  | 2.99595200  |

**B22**

**E= -991.03132314 a.u.**

|    |             |             |             |
|----|-------------|-------------|-------------|
| Rh | -0.15802600 | -0.15889600 | 0.13535700  |
| P  | 1.34725100  | -1.89616400 | -0.22250700 |
| P  | 1.43745000  | 0.92546600  | 1.44933600  |
| C  | 3.11092600  | -1.67426300 | 0.32765400  |
| H  | 3.21532800  | -1.97273600 | 1.38417500  |
| H  | 3.71276300  | -2.37389400 | -0.26092800 |
| C  | 3.26901800  | 0.57342200  | 1.21757900  |
| H  | 3.74691000  | 1.53785600  | 1.02683000  |
| H  | 3.67967600  | 0.18393700  | 2.16499000  |
| P  | -1.60647500 | 1.63781900  | -0.31348600 |
| P  | -2.01138500 | -1.52609200 | -0.32495100 |
| C  | -3.31497500 | 1.54785700  | 0.43012400  |
| H  | -3.99997200 | 2.09922300  | -0.24419500 |
| C  | -3.26577000 | 2.10922600  | 1.36964900  |
| H  | -3.68380400 | -0.70532300 | -0.39748000 |
| H  | -4.42483600 | -1.50418500 | -0.29166300 |
| H  | -3.86635400 | -0.23385900 | -1.37710900 |
| N  | 3.60600400  | -0.31533900 | 0.10069900  |
| N  | -3.79737100 | 0.21095800  | 0.72584800  |
| C  | 5.06201900  | -0.31648400 | -0.11209400 |
| H  | 5.30207900  | -0.92970200 | -0.98382300 |
| H  | 5.40056600  | 0.70365300  | -0.30868500 |
| H  | 5.60403400  | -0.70790700 | 0.76152000  |
| C  | -5.13772700 | 0.25189300  | 1.29993000  |
| H  | -5.43490800 | -0.75202600 | 1.61437800  |
| H  | -5.13342000 | 0.89366900  | 2.18504400  |
| H  | -5.89188200 | 0.63921600  | 0.59374800  |
| C  | -1.27128700 | 3.42387000  | -0.02765400 |
| H  | -1.20402700 | 3.64630800  | 1.03841400  |
| H  | -0.33973100 | 3.70311400  | -0.52451800 |
| H  | -2.08389900 | 4.01722400  | -0.45777300 |
| C  | 1.15346900  | 0.31532600  | 3.16673700  |
| H  | 1.27036300  | -0.77077200 | 3.19944800  |
| H  | 1.85277900  | 0.77462700  | 3.87202300  |
| H  | 0.13075200  | 0.55383200  | 3.46772900  |
| C  | 1.52599200  | 2.74392900  | 1.70953700  |
| H  | 0.58406400  | 3.10393900  | 2.12572200  |
| H  | 2.32786200  | 2.98808000  | 2.41268500  |
| H  | 1.71645600  | 3.24771200  | 0.75872900  |
| C  | -2.09266100 | -2.62577400 | -1.80259700 |
| H  | -3.05082900 | -3.15246200 | -1.84384200 |
| H  | -1.97565300 | -2.03492200 | -2.71521900 |
| H  | -1.29397800 | -3.37077800 | -1.77458700 |
| C  | -2.32170500 | -2.65354600 | 1.09551900  |
| H  | -1.41883400 | -3.19310100 | 1.38031300  |
| H  | -2.63257300 | -2.02963100 | 1.93745900  |
| H  | -3.11428300 | -3.37075500 | 0.86125600  |
| C  | 1.61337600  | -2.13679700 | -2.03226800 |
| H  | 0.65686400  | -2.20622500 | -2.55259400 |
| H  | 2.15518800  | -1.27695900 | -2.43463900 |
| H  | 2.19729800  | -3.04151500 | -2.22704700 |
| C  | 1.08599900  | -3.62231700 | 0.37244900  |
| P  | 1.93495200  | -4.25794500 | 0.10279600  |
| H  | 0.96718200  | -3.63138000 | 1.45911000  |
| H  | 0.18523500  | -4.04839300 | -0.07506100 |
| C  | -1.90494200 | 1.67213700  | -2.13602400 |
| H  | -2.06324900 | 0.67000500  | -2.53910300 |
| H  | -2.77181800 | 2.29703200  | -2.37207200 |
| H  | -1.02205300 | 2.10805100  | -2.61226000 |
| H  | 1.18815100  | 0.85640000  | -2.28473100 |
| H  | 3.05667800  | 0.82386500  | -1.18516700 |
| C  | 1.68411500  | 1.82700900  | -2.10412600 |
| O  | 2.87898800  | 1.73753400  | -1.53628500 |
| O  | 1.16903100  | 2.88023000  | -2.38840400 |

**B7'**

**E= -991.77368553 a.u.**

|   |             |             |             |
|---|-------------|-------------|-------------|
| P | -1.50168000 | 1.74205700  | 0.08098800  |
| P | -1.65261800 | -1.36375800 | -0.87143300 |
| H | -3.15716700 | 1.15558400  | 0.67504100  |
| C | -3.01617600 | 0.64903300  | 1.64235900  |



|    |             |             |             |   |             |             |             |
|----|-------------|-------------|-------------|---|-------------|-------------|-------------|
| N  | -3.33401100 | -0.79926100 | 0.90416500  | H | -3.77024800 | -2.15670100 | -1.52058900 |
| C  | -4.56353700 | -1.12747200 | 1.62399100  | H | -2.75123300 | -3.34039300 | -0.67711400 |
| H  | -4.55962500 | -0.75293500 | 2.66191000  | H | -4.31330200 | -2.84566100 | 0.03592100  |
| H  | -5.42096500 | -0.69606900 | 1.10166000  | C | 4.34651400  | -0.68657200 | 1.35095900  |
| H  | -4.69686600 | -2.21171600 | 1.64542600  | H | 4.51366700  | 0.10648300  | 2.08491200  |
| C  | 3.63525900  | -0.60137000 | 2.65626700  | H | 4.20926600  | -1.62613000 | 1.89511400  |
| H  | 4.69558600  | -0.33709400 | 2.50519500  | H | 5.25144100  | -0.78220500 | 0.72641900  |
| H  | 3.27377200  | -0.09935100 | 3.55712800  | C | 0.75725600  | -3.14130500 | -1.38824100 |
| H  | 3.57157400  | -1.68049900 | 2.82442600  | H | 0.39078400  | -3.49951100 | -0.42227200 |
| Rh | -0.06603000 | 0.03143000  | -0.49052600 | H | -0.04862300 | -3.24012300 | -2.12047100 |
| P  | -1.92591400 | 1.44299700  | -0.19862500 | H | 1.59905900  | -3.76685800 | -1.70308800 |
| P  | -1.18651000 | -1.45706100 | 0.93511600  | C | -1.04393200 | 0.29708300  | 3.13957500  |
| C  | -3.50324900 | 0.62252900  | 0.36325400  | H | -1.90321100 | 0.92824400  | 2.90170400  |
| H  | -3.56241900 | 0.60858500  | 1.46609100  | H | -1.29268300 | -0.33149500 | 3.99986900  |
| H  | -4.32219300 | 1.26174600  | 0.01785700  | H | -0.21218500 | 0.95276100  | 3.40866100  |
| C  | -2.99940700 | -1.73431700 | 0.56109400  | C | 0.61279700  | -1.89610400 | 2.43062700  |
| H  | -3.04909300 | -2.67083900 | -0.00457700 | H | 1.55273900  | -1.36381700 | 2.60094600  |
| H  | -3.53174800 | -1.89955000 | 1.51941400  | H | 0.23929000  | -2.30582600 | 3.37332800  |
| P  | 1.75452000  | -1.31739500 | -1.04794100 | H | 0.81666800  | -2.71628600 | 1.73816400  |
| P  | 1.51582600  | 1.64909100  | 0.17257500  | C | 1.85599900  | 3.21132400  | -1.11391600 |
| C  | 3.22378900  | -1.35017600 | 0.09840200  | H | 2.79961300  | 3.72120400  | -0.89414600 |
| H  | 4.12535500  | -1.52331200 | -0.52239600 | H | 1.86089300  | 2.86819300  | -2.15175000 |
| H  | 3.09800500  | -2.23342400 | 0.73461600  | H | 1.03513100  | 3.92481600  | -1.00187900 |
| C  | 3.29272300  | 1.07785200  | 0.23494900  | C | 1.71321400  | 2.53501700  | 1.67179000  |
| C  | 3.84864300  | 1.83943000  | 0.79080900  | H | 0.78036900  | 3.04322900  | 1.92962800  |
| H  | 3.74497500  | 1.03755400  | -0.77005500 | H | 1.88868800  | 1.73879800  | 2.40172600  |
| N  | -3.62712700 | -0.69413400 | -0.23573100 | H | 2.53860600  | 3.25241300  | 1.72480800  |
| N  | 3.36271800  | -0.18675400 | 0.95440000  | C | -3.07187300 | 1.62412200  | -2.09323700 |
| C  | -5.00619600 | -1.04163400 | -0.56148000 | H | -2.48780200 | 2.42413000  | -2.55512800 |
| H  | -5.42276000 | -0.29444400 | -1.24194900 | H | -3.01745800 | 0.75299000  | -2.74954200 |
| H  | -5.02551600 | -2.00788500 | -1.07217100 | H | -4.11004200 | 1.95229800  | -1.98595900 |
| H  | -5.65249100 | -1.10727500 | 0.33071600  | C | -2.80371200 | 2.67695600  | 0.52799400  |
| C  | 4.54504400  | -0.30157100 | 1.80029700  | H | -3.88637100 | 2.83733000  | 0.52102700  |
| H  | 4.56625700  | 0.52311400  | 2.51719700  | H | -2.45584600 | 2.57589600  | 1.55822100  |
| H  | 4.49742000  | -1.23660900 | 2.36534300  | H | -2.31907700 | 3.55772700  | 0.09724500  |
| H  | 5.48631400  | -0.29350600 | 1.22414400  | C | 1.82173400  | -1.06122600 | -2.99271500 |
| C  | 1.55563800  | -3.11585000 | -1.38149800 | H | 2.25656500  | -0.06139000 | -3.06078900 |
| H  | 1.32660600  | -3.65688100 | -0.46318800 | H | 2.56655200  | -1.80294800 | -3.29670300 |
| H  | 0.73662100  | -3.26111800 | -2.09028600 | H | 0.96771200  | -1.09833700 | -3.67272700 |
| H  | 2.47392000  | -3.52608500 | -1.81207700 | H | -0.25115400 | 0.68330000  | -1.98379800 |
| C  | -1.20717700 | -0.82514700 | 2.67273300  | H | -1.74601000 | -1.05391200 | -0.48720100 |
| H  | -1.56488100 | 0.20662100  | 2.70448100  |   |             |             |             |
| H  | -1.83477700 | -1.44251600 | 3.32332600  |   |             |             |             |
| H  | -0.18146700 | -0.83182000 | 3.05148100  |   |             |             |             |
| C  | -0.71172600 | -3.20955400 | 1.26534300  |   |             |             |             |
| H  | 0.30283400  | -3.24930200 | 1.67087800  |   |             |             |             |
| H  | -1.39303100 | -3.65501200 | 1.99718400  |   |             |             |             |
| H  | -0.75398200 | -3.79493800 | 0.34452200  |   |             |             |             |
| C  | 1.69883000  | 3.22815400  | -0.76482900 |   |             |             |             |
| C  | 2.47735100  | 3.86992300  | -0.34043100 |   |             |             |             |
| H  | 1.94526800  | 3.00224800  | -1.80603600 |   |             |             |             |
| H  | 0.75359800  | 3.77699100  | -0.76188600 |   |             |             |             |
| C  | 1.38477900  | 2.21398600  | 1.92320400  |   |             |             |             |
| H  | 0.39670200  | 2.61645400  | 2.14154200  |   |             |             |             |
| H  | 1.55776600  | 1.34321800  | 2.56053600  |   |             |             |             |
| C  | 2.13414100  | 2.98042500  | 2.14554600  |   |             |             |             |
| C  | -2.44651400 | 2.14249900  | -1.81671700 |   |             |             |             |
| H  | -1.60305600 | 2.65464500  | -2.28554700 |   |             |             |             |
| H  | -2.75483900 | 1.31873800  | -2.46495700 |   |             |             |             |
| H  | -3.27700600 | 2.84409600  | -1.69691400 |   |             |             |             |
| C  | -1.93591900 | 2.92446100  | 0.89617800  |   |             |             |             |
| C  | -2.90008100 | 3.43594700  | 0.81898000  |   |             |             |             |
| H  | -1.78298600 | 2.63143900  | 1.93776500  |   |             |             |             |
| H  | -1.14997100 | 3.62716200  | 0.61117100  |   |             |             |             |
| C  | 2.45791000  | -0.76912900 | -2.66241800 |   |             |             |             |
| C  | 2.66184500  | 0.30321600  | -2.65391000 |   |             |             |             |
| H  | 3.37655100  | -1.31210800 | -2.90298300 |   |             |             |             |
| H  | 1.71601300  | -0.96102600 | -3.44232600 |   |             |             |             |
| H  | -0.32004500 | 0.27011300  | -2.37086600 |   |             |             |             |
| H  | -0.78159600 | -0.37925700 | -2.21598800 |   |             |             |             |

TS<sub>B3-4</sub>

E= -1383.45533502 a.u.

|    |             |             |             |  |  |  |  |
|----|-------------|-------------|-------------|--|--|--|--|
| Rh | 1.17373400  | 0.10587700  | -0.38904300 |  |  |  |  |
| P  | 0.75570900  | 2.18541300  | -1.27167100 |  |  |  |  |
| P  | 1.79412700  | 1.12931800  | 1.63154300  |  |  |  |  |
| C  | 0.40195300  | 3.55469400  | -0.03882200 |  |  |  |  |
| H  | 1.34237800  | 4.10094900  | 0.16360900  |  |  |  |  |
| H  | -0.26911100 | 4.26563100  | -0.53157300 |  |  |  |  |
| C  | 0.73421600  | 2.58947800  | 2.16931600  |  |  |  |  |
| H  | 0.17504200  | 2.26419600  | 3.05342700  |  |  |  |  |
| H  | 1.41205300  | 3.39824500  | 2.50567400  |  |  |  |  |
| P  | 1.03246600  | -2.09836600 | 0.36549700  |  |  |  |  |
| C  | 3.41711800  | -0.46552200 | -1.33597100 |  |  |  |  |
| P  | 2.59534300  | -2.73847500 | 1.19497500  |  |  |  |  |
| H  | 2.67790300  | -3.82168100 | 0.97276400  |  |  |  |  |
| H  | 2.42073800  | -2.65250500 | 2.27311800  |  |  |  |  |
| C  | 4.12035700  | -2.01512500 | -0.55191100 |  |  |  |  |
| H  | 5.20479600  | -2.01940800 | -0.70187400 |  |  |  |  |
| C  | 3.73413400  | -2.91048400 | -1.06830300 |  |  |  |  |
| N  | -0.22900300 | 3.09297300  | 1.19488400  |  |  |  |  |
| N  | 3.82862300  | -2.03423700 | 0.88174900  |  |  |  |  |
| C  | -1.01704100 | 4.15669300  | 1.81325400  |  |  |  |  |
| H  | -1.77083200 | 4.52269200  | 1.11019600  |  |  |  |  |
| H  | -1.53494200 | 3.76274800  | 2.69313300  |  |  |  |  |
| H  | -0.39872700 | 5.01400600  | 2.13156700  |  |  |  |  |
| C  | 4.93173000  | -2.56711100 | 1.67243200  |  |  |  |  |
| H  | 5.84074200  | -1.99350500 | 1.47253300  |  |  |  |  |
| H  | 4.70022900  | -2.46902600 | 2.73763200  |  |  |  |  |
| H  | 5.13649900  | -3.63186200 | 1.46246500  |  |  |  |  |
| C  | -0.17441700 | -2.71978100 | 1.61992200  |  |  |  |  |
| H  | -0.05589100 | -2.17282400 | 2.55738100  |  |  |  |  |
| H  | -1.18823500 | -2.55773900 | 1.24907900  |  |  |  |  |
| H  | -0.02290800 | -3.78731100 | 1.81163500  |  |  |  |  |
| C  | 3.47691400  | 1.88851500  | 1.68728400  |  |  |  |  |
| H  | 3.62263400  | 2.55259900  | 0.83092500  |  |  |  |  |
| H  | 3.64416600  | 2.44939300  | 2.61213600  |  |  |  |  |
| H  | 4.20742500  | 1.07786900  | 1.62592900  |  |  |  |  |
| C  | 1.85971300  | 0.19386500  | 3.22348800  |  |  |  |  |
| H  | 2.62967200  | -0.57618500 | 3.12914100  |  |  |  |  |
| H  | 2.11581500  | 0.84677600  | 4.06378100  |  |  |  |  |
| H  | 0.89904900  | -0.28590900 | 3.42450500  |  |  |  |  |
| C  | 3.39770800  | -0.95925100 | -3.11754600 |  |  |  |  |
| C  | 4.34553900  | -1.40025800 | -3.44362100 |  |  |  |  |
| H  | 2.58584400  | -1.67052200 | -3.28844600 |  |  |  |  |
| C  | 3.19324400  | -0.07565900 | -3.72884600 |  |  |  |  |
| C  | 4.94289000  | 0.59182300  | -1.32215600 |  |  |  |  |
| H  | 4.73655300  | 1.55722700  | -1.79087500 |  |  |  |  |
| H  | 5.25953100  | 0.77264900  | -0.29286400 |  |  |  |  |
| H  | 5.76539400  | 0.11102800  | -1.86274900 |  |  |  |  |
| C  | -0.60630500 | 2.36104000  | -2.49989900 |  |  |  |  |
| H  | -0.34121300 | 1.75619500  | -3.37212700 |  |  |  |  |

TS<sub>B2-15</sub>

E= -802.45539419 a.u.

|    |             |             |             |  |  |  |  |
|----|-------------|-------------|-------------|--|--|--|--|
| Rh | -0.23653300 | 0.24238500  | -0.45953600 |  |  |  |  |
| P  | -2.30644100 | 1.20771000  | -0.47171400 |  |  |  |  |
| P  | -0.56919600 | -0.70869100 | 1.66670800  |  |  |  |  |
| C  | -3.48356300 | -0.13169900 | 0.20832100  |  |  |  |  |
| H  | -3.77487700 | 0.09230100  | 1.23743200  |  |  |  |  |
| H  | -4.39001100 | -0.20214900 | -0.39602600 |  |  |  |  |
| C  | -2.11197500 | -1.79453400 | 1.43033600  |  |  |  |  |
| H  | -1.78280700 | -2.83362600 | 1.34764800  |  |  |  |  |
| C  | -2.83060100 | -1.71917200 | 2.25134600  |  |  |  |  |
| P  | 1.22562800  | -1.35717100 | -1.27628400 |  |  |  |  |
| P  | 1.56552800  | 1.76964500  | -0.00260000 |  |  |  |  |
| C  | 2.83999700  | -1.50139100 | -0.32151700 |  |  |  |  |
| H  | 3.65419800  | -1.67421000 | -1.05266200 |  |  |  |  |
| C  | 2.76537500  | -2.41068200 | 0.28525700  |  |  |  |  |
| C  | 3.21802200  | 0.90371100  | -0.09990600 |  |  |  |  |
| H  | 3.96668600  | 1.53038700  | 0.39632600  |  |  |  |  |
| H  | 3.53540100  | 0.81675400  | -1.15273100 |  |  |  |  |
| N  | -2.74037600 | -1.41488600 | 0.14637200  |  |  |  |  |
| N  | 3.14651400  | -0.39382100 | 0.57394300  |  |  |  |  |
| C  | -3.44663100 | -2.50981500 | -0.53937900 |  |  |  |  |



|   |             |             |             |
|---|-------------|-------------|-------------|
| H | -1.54252800 | 1.97171500  | -2.09463900 |
| H | -0.73905500 | 3.40132300  | -2.81408300 |
| C | 2.12933000  | 2.99765500  | -2.20357400 |
| H | 1.84206600  | 3.98747200  | -2.57297200 |
| H | 3.00194900  | 3.10103600  | -1.55343800 |
| C | 2.40676400  | 2.37060200  | -3.05528400 |
| C | 0.74832500  | -3.35378200 | -0.95509600 |
| H | 1.42158300  | -3.17947000 | -1.79645300 |
| H | 0.88161800  | -4.37444100 | -0.58304400 |
| H | -0.27693500 | -3.22727900 | -1.30961500 |
| H | 0.56816900  | -0.46883600 | -1.75621300 |
| H | -0.82923300 | 0.18281100  | -0.15320500 |
| P | -2.43742300 | -0.15851700 | -0.12298100 |
| N | -3.38035500 | 1.05464400  | -0.88834400 |
| N | -2.79833300 | -0.48971200 | 1.50135500  |
| N | -2.55035600 | -1.57628900 | -1.04908200 |
| C | -1.92966600 | 0.17144200  | 2.47266100  |
| H | -1.09669200 | 0.65164800  | 1.95622800  |
| C | -2.14263400 | -1.44831800 | -2.44860100 |
| H | -2.98215200 | -1.23198800 | -3.12250000 |
| C | -3.33786800 | 2.32867900  | -0.17696500 |
| H | -2.35834100 | 2.43833100  | 0.30252400  |
| C | -3.48384200 | -2.65533500 | -0.74281400 |
| H | -3.22399900 | -3.08952400 | 0.22630000  |
| H | -3.32988400 | -3.44821000 | -1.48214100 |
| C | -4.96110200 | -2.21715100 | -0.74582700 |
| H | -5.28485300 | -2.05225600 | -1.77873900 |
| H | -5.58154500 | -3.03308900 | -0.34310000 |
| C | -3.87548300 | -1.28577800 | 2.09250400  |
| H | -3.60932000 | -2.35074700 | 2.08659500  |
| C | -3.95750300 | -1.00335900 | 3.14730600  |
| H | -5.24034100 | -1.05768200 | 1.43093800  |
| H | -5.93106500 | -1.84773800 | 1.76814000  |
| H | -5.64169900 | -0.10578500 | 1.78883700  |
| C | -4.61802300 | 0.76548100  | -1.60320800 |
| H | -4.39626900 | 0.08229000  | -2.42780700 |
| H | -4.97769600 | 1.69508100  | -2.05789600 |
| C | -5.69781200 | 0.14799700  | -0.70894400 |
| H | -6.03319100 | 0.88514000  | 0.02571400  |
| H | -6.57469600 | -0.11814800 | -1.31900100 |
| N | -5.14811200 | -0.98992900 | -0.00547900 |
| H | -2.47862800 | 0.93893100  | 3.03439600  |
| H | -1.52570300 | -0.55567000 | 3.18725300  |
| H | -4.10980700 | 2.40735800  | 0.60238000  |
| H | -3.46934500 | 3.15484400  | -0.88464700 |
| H | -1.39497900 | -0.65819500 | -2.54376300 |
| H | -1.67348000 | -2.38008000 | -2.77985900 |

**TS<sub>B6-7</sub>**

**E= -990.56026073 a.u.**

|    |             |             |             |
|----|-------------|-------------|-------------|
| Rh | 0.13496200  | 0.02265100  | -0.30915700 |
| P  | -1.69869700 | -1.11030500 | -1.16417200 |
| P  | -1.03841100 | 0.40969600  | 1.81476100  |
| C  | -3.32951200 | -0.39183500 | -0.61795500 |
| C  | -3.41561200 | 0.62999900  | -1.02052000 |
| H  | -4.11133600 | -0.99516000 | -1.09356000 |
| C  | -2.87364600 | 0.65132800  | 1.54175000  |
| H  | -3.34224200 | 0.74214100  | 2.52920100  |
| H  | -3.01779600 | 1.61959600  | 1.02713600  |
| P  | 1.51298700  | -1.80247200 | -0.16778800 |
| P  | 1.91406800  | 1.46865300  | -0.39657300 |
| C  | 3.35801600  | -1.56574500 | 0.08010800  |
| H  | 3.85154000  | -1.70049300 | -0.90349300 |
| H  | 3.69445500  | -2.38960700 | 0.71866900  |
| C  | 3.64480500  | 0.79388500  | -0.25192000 |
| H  | 4.28186200  | 1.61825400  | 0.08636500  |
| H  | 4.00033100  | 0.50429200  | -1.26010300 |
| N  | -3.52153900 | -0.44774000 | 0.82969100  |
| N  | 3.75757800  | -0.30998700 | 0.69324400  |
| C  | -4.93879800 | -0.52142600 | 1.16290300  |
| H  | -5.38685100 | -1.39443300 | 0.67926200  |
| H  | -5.05787100 | -0.64053400 | 2.24364300  |
| H  | -5.49984200 | 0.37755000  | 0.84777300  |
| C  | 5.10594300  | -0.40628200 | 1.23630000  |
| H  | 5.36941900  | 0.53138700  | 1.73353900  |
| H  | 5.14641100  | -1.20563600 | 1.98181500  |
| H  | 5.86601700  | -0.61523000 | 0.45988800  |
| C  | 1.16410400  | -3.00002200 | 1.20378700  |
| H  | 1.32706500  | -2.48941700 | 2.15643400  |
| C  | 0.11647000  | -3.30794600 | 1.16151200  |
| H  | 1.80323000  | -3.88850200 | 1.15257400  |
| C  | -0.77813000 | 1.92400900  | 2.85421100  |
| H  | -0.85053700 | 2.81037200  | 2.21842000  |
| H  | -1.51897500 | 1.99669200  | 3.65947900  |
| H  | 0.22077400  | 1.89888700  | 3.29712100  |
| C  | -1.12245200 | -0.87966500 | 3.14589900  |
| H  | -0.11897000 | -1.06471400 | 3.53915400  |
| H  | -1.77845800 | -0.57861400 | 3.97137200  |
| H  | -1.50192500 | -1.80863200 | 2.71214000  |
| C  | 2.11874100  | 2.46997500  | -1.93450100 |
| C  | 3.05145300  | 3.04575100  | -1.91897800 |
| H  | 2.10586100  | 1.80771900  | -2.80281500 |
| H  | 1.27697100  | 3.16126200  | -2.01292600 |

**TS<sub>B8-9</sub>**

**E= -990.57161146 a.u.**

|    |             |             |             |
|----|-------------|-------------|-------------|
| Rh | -0.08049600 | -0.01824700 | -0.31420300 |
| P  | -1.80024100 | -1.58526900 | -0.07812700 |
| P  | -1.56067900 | 1.84913400  | 0.08669800  |
| C  | -3.46078800 | -0.92224500 | -0.62141600 |
| H  | -3.43510900 | -0.81417000 | -1.72196600 |
| H  | -4.19703400 | -1.69975600 | -0.38816200 |
| C  | -3.27559100 | 1.50180800  | -0.55807600 |
| H  | -3.90412300 | 2.36721400  | -0.31618800 |
| H  | -3.22195900 | 1.42988000  | -1.66023900 |
| P  | 1.16549300  | -0.13020600 | 1.69305800  |
| P  | 1.79448100  | 0.74046500  | -1.41441600 |
| C  | 2.98973400  | -0.47621600 | 1.49105800  |
| H  | 3.10931900  | -1.52601100 | 1.17375500  |
| H  | 3.43510800  | -0.38214700 | 2.48798600  |
| C  | 3.46162500  | 0.16231200  | -0.81359900 |
| H  | 4.21834000  | 0.70116000  | -1.39576700 |
| H  | 3.57755400  | -0.91325500 | -1.04184000 |
| N  | -3.87491300 | 0.31140900  | 0.03607500  |
| N  | 3.67904100  | 0.45458200  | 0.60069400  |
| C  | -5.32714100 | 0.41917500  | 0.08752400  |
| H  | -5.74354500 | -0.45240200 | 0.60057400  |
| H  | -5.61011700 | 1.30953000  | 0.65659500  |
| H  | -5.78961900 | 0.48581400  | -0.91496000 |
| C  | 5.10325500  | 0.50028100  | 0.90528300  |
| H  | 5.59063100  | 1.25094100  | 0.27635900  |
| H  | 5.24893100  | 0.79014500  | 1.94999900  |
| C  | 5.60542800  | -0.47123100 | 0.74100300  |
| H  | 1.27085900  | 1.39343000  | 2.73810900  |
| H  | 1.55735200  | 2.24211200  | 2.11211300  |
| H  | 0.29113700  | 1.59494000  | 3.17767400  |
| C  | 2.00364600  | 1.28093200  | 3.54444000  |
| H  | -1.29788000 | 3.46569100  | -0.78515500 |
| H  | -1.13996200 | 3.27790300  | -1.85101900 |
| H  | -2.15015400 | 4.14450900  | -0.66246900 |
| H  | -0.40217800 | 3.95046100  | -0.38789200 |
| C  | -2.02742900 | 2.48630600  | 1.76584700  |
| H  | -1.16144200 | 2.96269300  | 2.23211600  |
| H  | -2.84243400 | 3.21778900  | 1.71286300  |
| H  | -2.34421200 | 1.64489500  | 2.38785600  |
| C  | 1.94946600  | 0.39404500  | -3.21650500 |
| H  | 2.89113400  | 0.77675600  | -3.62534200 |
| H  | 1.87193100  | -0.68098300 | -3.38261400 |
| H  | 1.11074000  | 0.87750300  | -3.72442500 |
| C  | 2.12070600  | 2.56352700  | -1.40219800 |
| H  | 1.28379200  | 3.08199600  | -1.87487300 |
| H  | 2.20989100  | 2.90505500  | -0.36790600 |
| H  | 3.04247600  | 2.81033500  | -1.94067500 |
| C  | -2.26912200 | -2.24167300 | 1.58484300  |
| H  | -1.43753000 | -2.81961300 | 1.99363500  |
| H  | -2.47898300 | -1.40086400 | 2.25110100  |
| H  | -3.15470000 | -2.88409900 | 1.52723600  |
| C  | -1.85989400 | -3.15077600 | -1.06908500 |
| H  | -2.85057300 | -3.61722300 | -1.01621900 |
| H  | -1.60949300 | -2.93294000 | -2.10950900 |
| H  | -1.12330400 | -3.85731400 | -0.67890800 |
| C  | 0.80559000  | -1.39067900 | 2.99371700  |
| H  | 0.83236700  | -2.38250500 | 2.53834500  |
| H  | 1.53705800  | -1.34299900 | 3.80761800  |
| H  | -0.19200800 | -1.21525200 | 3.40391600  |
| H  | -0.70711200 | -0.04650600 | -1.78611800 |
| C  | 1.19306600  | -2.53353000 | -0.91654900 |
| O  | 1.35066100  | -2.99876800 | 0.16733600  |
| O  | 1.25279500  | -2.54432400 | -2.09950400 |

**TS<sub>B9-7</sub>**

**E= -990.56079831 a.u.**

|   |             |             |             |
|---|-------------|-------------|-------------|
| P | -1.33253500 | 1.82512100  | 0.22082400  |
| P | -2.00117300 | -1.40178200 | -0.25798700 |

|    |             |             |             |   |             |             |             |
|----|-------------|-------------|-------------|---|-------------|-------------|-------------|
| P  | 1.82191600  | 1.11142800  | -1.05435800 | H | 1.21421100  | -0.53247100 | -3.87693300 |
| P  | 1.17099000  | -0.89217800 | 1.54993100  | H | 2.57521900  | -1.62978000 | -3.55060200 |
| C  | -1.79126200 | 2.95024100  | -1.17467800 | C | -0.73314500 | -2.08190800 | 2.00183600  |
| C  | -2.78662900 | -1.62120300 | -1.90347600 | H | -1.26332900 | -1.29377200 | 2.53875700  |
| C  | 1.96231300  | 1.34540600  | -2.87097400 | H | -1.17350600 | -3.05027800 | 2.25527900  |
| C  | 0.88347700  | -2.58412200 | 2.23668300  | C | 0.32026700  | -2.07550500 | 2.29183600  |
| C  | -1.99923100 | -3.11115900 | 0.42905400  | H | 0.07001800  | -3.30752600 | -0.41398400 |
| C  | -0.73674300 | 3.04017300  | 1.49308700  | H | 1.04637400  | -3.36950000 | 0.06417200  |
| C  | 1.19308100  | 0.10942800  | 3.10746700  | H | -0.51855000 | -4.18592900 | -0.13168600 |
| C  | 2.09318200  | 2.83965900  | -0.45956900 | C | 0.17856200  | -3.29599900 | -1.49866600 |
| H  | -0.09889900 | -0.55475300 | -1.95366500 | C | 2.19309400  | 2.54105800  | 1.35383100  |
| H  | -0.08102100 | -2.61192200 | 2.74974300  | H | 2.98471400  | 2.62788300  | 2.10417500  |
| H  | 0.86100400  | -3.30806900 | 1.41859500  | H | 2.59061900  | 2.73451500  | 0.35639500  |
| H  | 1.66454600  | -2.86373300 | 2.95243000  | H | 1.42176100  | 3.29536800  | 1.52111600  |
| H  | 1.78860700  | -0.36380200 | 3.89663800  | C | 0.86023000  | 0.88275100  | 3.21157900  |
| H  | 1.62022800  | 1.08993700  | 2.87956800  | H | 0.09470000  | 1.64918200  | 3.34686900  |
| H  | 0.16888500  | 0.24833200  | 3.46597000  | H | 0.45340000  | -0.08334900 | 3.51223700  |
| H  | 2.22207200  | 2.83331700  | 0.62533000  | H | 1.70546500  | 1.12924200  | 3.86109000  |
| H  | 1.25060100  | 3.48152200  | -0.72616700 | C | -3.11145100 | 2.01750300  | -0.91933500 |
| H  | 2.99678000  | 3.25259600  | -0.91932800 | H | -2.50373000 | 2.86950900  | -1.21715600 |
| H  | 1.95254100  | 0.36008800  | -3.33843600 | H | -3.28692700 | 1.35733400  | -1.77111000 |
| H  | 2.88422800  | 1.87680400  | -3.12978200 | H | -4.06818600 | 2.37039900  | -0.52247600 |
| H  | 1.10019500  | 1.91911400  | -3.22090100 | C | -2.31943400 | 2.05142800  | 1.90897000  |
| H  | -2.06800000 | -2.12570900 | -2.55066200 | H | -3.33633800 | 2.43041100  | 2.04678300  |
| H  | -3.01879900 | -0.63499400 | -2.31000700 | H | -2.06004300 | 1.42835500  | 2.76865300  |
| H  | -3.70385600 | -2.21458400 | -1.82630600 | H | -1.62750700 | 2.89039900  | 1.82530600  |
| H  | -0.89588400 | 3.21532300  | -1.74296200 | C | 2.99230400  | 0.95256800  | -2.02260600 |
| H  | -2.45565600 | 2.39339900  | -1.84098700 | H | 3.48680300  | 1.35133900  | -1.13460600 |
| H  | -2.29217900 | 3.86427900  | -0.83606200 | H | 3.75331100  | 0.55565000  | -2.70073500 |
| H  | -1.50930600 | 3.78209200  | 1.72562100  | H | 2.45581100  | 1.78332000  | -2.49019100 |
| H  | -0.47662100 | 2.49756600  | 2.40581800  | H | -0.10475000 | 1.94395600  | -1.87871700 |
| H  | 0.15261700  | 3.56711900  | 1.14987000  | H | -0.98487800 | -0.15293400 | -1.67941700 |
| H  | -1.85047800 | -3.08017200 | 1.51077700  | C | 0.27908600  | 2.84083500  | -1.24579600 |
| H  | -2.95513300 | -3.60115500 | 0.21754500  | O | 1.25133700  | 3.43017200  | -1.70369100 |
| H  | -1.18983900 | -3.66873800 | -0.04176300 | O | -0.37377000 | 3.01341600  | -0.17924500 |
| O  | 0.81367500  | -1.90385700 | -1.79516700 |   |             |             |             |
| C  | 1.95738500  | -1.66796800 | -2.16147400 |   |             |             |             |
| O  | 0.08205600  | -2.88316800 | -1.76042000 |   |             |             |             |
| C  | -3.01579600 | 1.60007900  | 0.99648200  |   |             |             |             |
| H  | -2.86517200 | 1.38390700  | 2.07364900  |   |             |             |             |
| H  | -3.51981700 | 2.57151600  | 0.93411900  |   |             |             |             |
| C  | -3.45063500 | -0.75128400 | 0.71340700  |   |             |             |             |
| H  | -4.28156300 | -1.43177500 | 0.49651000  |   |             |             |             |
| H  | -3.23110400 | -0.84676000 | 1.79527800  |   |             |             |             |
| N  | -3.85493100 | 0.60098200  | 0.36006500  |   |             |             |             |
| C  | -5.26244400 | 0.82656700  | 0.66260100  |   |             |             |             |
| C  | -5.55138100 | 1.83177200  | 0.34291000  |   |             |             |             |
| H  | -5.87662900 | 0.10907600  | 0.11153100  |   |             |             |             |
| H  | -5.48726600 | 0.72465500  | 1.74077900  |   |             |             |             |
| C  | 3.00814800  | -1.04268400 | 1.26578200  |   |             |             |             |
| C  | 3.17603700  | -1.86651400 | 0.55080300  |   |             |             |             |
| C  | 3.45792600  | -1.33166500 | 2.22286900  |   |             |             |             |
| C  | 3.48619100  | 0.41196200  | -0.61832100 |   |             |             |             |
| H  | 4.22632600  | 1.15321700  | -0.93966300 |   |             |             |             |
| H  | 3.63612400  | -0.50792900 | -1.19872900 |   |             |             |             |
| N  | 3.62925400  | 0.20466900  | 0.82255000  |   |             |             |             |
| C  | 5.03202100  | 0.26013700  | 1.21600000  |   |             |             |             |
| H  | 5.45436700  | 1.23016500  | 0.93762200  |   |             |             |             |
| H  | 5.11550200  | 0.15757300  | 2.30187900  |   |             |             |             |
| H  | 5.64003800  | -0.53240600 | 0.74341000  |   |             |             |             |
| Rh | -0.04799700 | -0.11297900 | -0.36096500 |   |             |             |             |

**TS<sub>B13-14</sub>**  
**E= -1571.98137596 a.u.**

|    |             |             |             |
|----|-------------|-------------|-------------|
| Rh | -0.83942200 | -0.01621700 | 0.12356800  |
| P  | -0.83801000 | 2.04241600  | 1.26381000  |
| C  | -1.55377300 | 1.09342100  | -1.74391000 |
| P  | -2.27464600 | 3.14316100  | 0.83758400  |
| H  | -3.19778300 | 2.67591800  | 1.22464200  |
| H  | -2.12417400 | 4.07284300  | 1.39671200  |
| C  | -2.86568400 | 2.36112900  | -1.38078600 |
| H  | -3.19516300 | 2.75710200  | -2.34701000 |
| H  | -3.72953900 | 1.85065300  | -0.91984300 |
| P  | -1.08779900 | -2.23058900 | -0.74469200 |
| P  | -3.43964700 | -0.64302400 | 1.29085200  |
| C  | -2.73531000 | -2.73355700 | -1.49438200 |
| H  | -2.81910500 | -3.82703300 | -1.33834400 |
| H  | -2.63887600 | -2.58042500 | -2.57383700 |
| C  | -4.13752300 | -2.13849700 | 0.40113700  |
| H  | -5.21188100 | -2.17936500 | 0.60710600  |
| H  | -3.71426900 | -3.06377300 | 0.82172700  |
| N  | -2.36731900 | 3.46748300  | -0.57626300 |
| C  | -3.92811500 | -2.03828300 | -1.04339000 |
| N  | -3.15687200 | 4.67854200  | -0.78908100 |
| H  | -2.71057800 | 5.50933300  | -0.23685200 |
| H  | -3.14952100 | 4.93937700  | -1.85045300 |
| C  | -4.20491200 | 4.56302100  | -0.46328400 |
| H  | -5.08855700 | -2.48806900 | -1.80774600 |
| H  | -5.96919200 | -1.91240200 | -1.51164300 |
| H  | -4.91563400 | -2.31518200 | -2.87458400 |
| H  | -5.30460200 | -3.56059600 | -1.66382100 |
| C  | -0.01305300 | -2.90732800 | -2.08623200 |
| H  | -0.15117100 | -2.33530800 | -3.00719700 |
| H  | 1.04001900  | -2.84543100 | -1.80363100 |
| H  | -0.26128000 | -3.95497900 | -2.28268600 |
| C  | -2.40339600 | 0.16010700  | -3.08202600 |
| H  | -3.26077200 | -0.35857100 | -2.64469600 |
| H  | -2.73934800 | 0.83964500  | -3.87045400 |
| H  | -1.72285500 | -0.57337800 | -3.52221800 |
| C  | -0.39130500 | 2.14698600  | -2.70744900 |
| H  | 0.45470700  | 1.56341000  | -3.07341900 |
| H  | -0.90788200 | 2.59239400  | -3.56294500 |
| C  | -0.03098000 | 2.95324500  | -2.06576800 |
| H  | -3.30059700 | -1.30561800 | 3.01152800  |
| H  | -4.10141600 | -2.01325800 | 3.24943000  |
| H  | -2.32410900 | -1.78444300 | 3.12865100  |
| H  | -3.35549800 | -0.48338000 | 3.73083700  |
| C  | -4.99993500 | 0.35768600  | 1.40876500  |
| H  | -4.81804000 | 1.28521300  | 1.95916700  |
| H  | -5.34101200 | 0.62031100  | 0.40241700  |
| H  | -5.79807000 | -0.19368100 | 1.91740000  |
| C  | 0.55703000  | 3.22881400  | 1.14134300  |
| H  | 1.50525800  | 2.70273200  | 1.27780100  |
| H  | 0.54392600  | 3.68440500  | 0.14824000  |
| C  | 0.45724800  | 4.01770700  | 1.89293900  |
| H  | -1.09967700 | 1.90992300  | 3.08158800  |
| H  | -1.47687800 | 2.85853200  | 3.47598200  |
| H  | -1.81009500 | 1.11239600  | 3.30059600  |
| H  | -0.16285600 | 1.67211300  | 3.58684400  |

**TS<sub>B10-11</sub>**  
**E= -990.97242797 a.u.**

|    |             |             |             |
|----|-------------|-------------|-------------|
| Rh | -0.14629200 | 0.24881600  | -0.41784500 |
| P  | -2.23291700 | 1.06494300  | 0.37222900  |
| P  | -0.79750700 | -1.81150700 | 0.19066900  |
| C  | -3.49436600 | -0.27182700 | 0.67959300  |
| C  | -3.34830000 | -0.77528300 | 1.65043400  |
| H  | -4.46920800 | 0.22203800  | 0.73552900  |
| C  | -2.53245200 | -2.25907600 | -0.31912400 |
| H  | -2.43167000 | -2.76011700 | -1.28844300 |
| H  | -2.86568200 | -3.02259800 | 0.41302100  |
| P  | 1.84566800  | -0.39954900 | -1.56155100 |
| P  | 1.40351000  | 0.88720900  | 1.44861400  |
| C  | 2.93509000  | -1.54783300 | -0.56954700 |
| C  | 3.98620800  | -1.27361000 | -0.77627800 |
| C  | 2.79024900  | -2.55629800 | -0.96903100 |
| C  | 2.88573700  | -0.26551300 | 1.49552800  |
| C  | 3.12740000  | -0.43033300 | 2.54943300  |
| H  | 3.75593800  | 0.25346600  | 1.05848800  |
| N  | -3.47383900 | -1.17584300 | -0.45849100 |
| N  | 2.65031800  | -1.56504400 | 0.86187700  |
| C  | -4.78860300 | -1.66294100 | -0.86063600 |
| H  | -5.44531000 | -0.81402800 | -1.06433800 |
| H  | -4.69408000 | -2.24087500 | -1.78384800 |
| H  | -5.26056200 | -2.30096600 | -0.09467800 |
| C  | 3.43342100  | -2.61906100 | 1.51019900  |
| C  | 3.16223200  | -2.68382400 | 2.56714700  |
| H  | 3.21222300  | -3.58427200 | 1.04450900  |
| H  | 4.51962700  | -2.44740400 | 1.43732900  |
| C  | 1.62055800  | -1.25803600 | -3.16725800 |
| H  | 0.91286600  | -2.08342700 | -3.08574100 |

|   |             |             |             |   |             |             |             |
|---|-------------|-------------|-------------|---|-------------|-------------|-------------|
| C | -0.88331700 | -3.50719800 | 0.56548200  | H | 6.37640300  | 1.19971000  | -0.43738500 |
| H | -1.58341200 | -3.32125200 | 1.38009000  | C | -0.67920700 | 2.18292300  | -2.34258900 |
| H | -1.05076600 | -4.50312100 | 0.14529300  | H | -0.15055000 | 1.91980200  | -3.26271800 |
| H | 0.10837300  | -3.44131400 | 1.00752600  | H | -1.46789300 | 1.44382700  | -2.19077500 |
| H | 1.17549100  | 0.25649400  | 2.56078000  | H | -1.12508700 | 3.17701300  | -2.45910500 |
| 0 | 0.89468200  | 0.07690900  | -0.31620900 | C | 1.45380200  | 3.70636000  | -1.35767500 |
| C | 0.72255500  | -0.74971200 | 2.70470500  | H | 0.79051400  | 4.57530100  | -1.43644400 |
| O | 1.13779900  | -1.46878200 | 3.60406900  | H | 2.21734900  | 3.89516500  | -0.59888600 |
| O | -0.21671800 | -1.05538600 | 1.87646600  | H | 1.96540800  | 3.56503600  | -2.31380600 |
| P | 2.65771800  | -0.01994600 | -0.27599000 | C | 1.69446200  | -3.01021700 | -1.81123900 |
| N | 3.21852100  | -0.67694900 | -1.76838300 | H | 2.48984100  | -2.65505300 | -2.47036000 |
| N | 2.99975500  | -1.03321500 | 1.02898700  | H | 1.81422600  | -4.08478000 | -1.63823300 |
| C | 3.29438000  | 1.55045500  | 0.02531600  | H | 0.74488800  | -2.82707700 | -2.32002100 |
| N | 2.61695000  | -2.42346900 | 0.82248300  | H | 1.58964500  | -0.04316700 | -2.06666500 |
| H | 1.79884000  | -2.47381800 | 0.10462600  | H | -1.68193800 | 0.78104000  | 0.70898000  |
| C | 2.94135000  | 2.43216000  | -1.09103300 | P | -3.04332800 | -0.07842500 | 0.11018100  |
| C | 3.65955400  | 2.37413000  | -1.92154300 | N | -2.88804400 | -0.60350100 | -1.50601800 |
| C | 2.30289300  | -0.51875400 | -2.89382200 | N | -4.21589300 | 1.16862500  | 0.24846200  |
| C | 1.27757200  | -0.42554500 | -2.52921900 | N | -3.38952800 | -1.31403100 | 1.23180200  |
| C | 4.60175600  | 1.88552700  | 0.61022100  | C | -4.18830900 | 2.20670300  | -0.77336100 |
| H | 4.56276700  | 1.75103400  | 1.69198700  | H | -3.15867000 | 2.40820300  | -1.07850200 |
| H | 4.76666200  | 2.95515400  | 0.44647200  | C | -2.46504700 | -1.46534300 | 2.35104100  |
| C | 5.77334400  | 1.08529300  | 0.02340700  | H | -2.30596900 | -2.52880600 | 2.55856800  |
| H | 5.93948300  | 1.38515300  | -1.01606300 | C | -1.54642300 | -1.09764600 | -1.83292900 |
| H | 6.69098000  | 1.33920700  | 0.57910800  | H | -1.32000900 | -0.88104900 | -2.88251200 |
| C | 4.06089800  | -0.83808300 | 2.00254000  | C | -4.61978200 | -2.09074600 | 1.41235300  |
| C | 3.92691800  | 0.12945000  | 2.48843800  | H | -5.24939700 | -1.62838700 | 2.18711000  |
| H | 3.91852200  | -1.58110200 | 2.79224100  | H | -4.33898500 | -3.07875600 | 1.79549400  |
| C | 5.45711900  | -0.96966400 | 1.35499500  | C | -5.42133100 | -2.28271800 | 0.12683700  |
| H | 6.21923000  | -0.55112800 | 2.02787500  | H | -4.89051700 | -2.98635700 | -0.51933700 |
| H | 5.69936700  | -2.02898000 | 1.22811200  | H | -6.38720600 | -2.74678400 | 0.38393700  |
| C | 4.61401900  | -0.69305300 | -2.21475100 | C | -5.50297500 | 0.91955300  | 0.87524800  |
| H | 4.88435500  | 0.29402200  | -2.62604900 | H | -5.32910400 | 0.47923400  | 1.86101700  |
| H | 4.69280900  | -1.40272700 | -3.04764400 | H | -5.99554900 | 1.88257600  | 1.04568400  |
| C | 5.61257800  | -1.11087500 | -1.14108200 | C | -6.39394300 | -0.00917800 | 0.01962000  |
| H | 5.42790700  | -2.15718900 | -0.88251800 | H | -7.19261700 | -0.44032900 | 0.63828400  |
| H | 6.62188800  | -1.05901700 | -1.58281600 | H | -6.88606500 | 0.56852600  | -0.76878700 |
| N | 5.48604400  | -0.32547400 | 0.06273700  | C | -3.87710100 | -1.32759400 | -2.30968700 |
| N | 3.44381900  | -3.03161100 | 0.43015700  | H | -3.70515100 | -2.40884700 | -2.18805500 |
| H | 2.26562300  | -2.83774300 | 1.77291100  | C | -3.67963600 | -1.10590900 | -3.36527600 |
| H | 2.35394600  | -1.39586400 | -3.54914900 | H | -5.32851900 | -0.99935400 | -2.00806000 |
| H | 2.54348200  | 0.37015500  | -3.49802300 | H | -5.55664200 | 0.00820500  | -2.35658600 |
| H | 1.95376200  | 2.16917700  | -1.47405900 | N | -5.96659600 | -1.69288900 | -2.57278800 |
| H | 2.89589400  | 3.46850600  | -0.74338800 | N | -5.57674900 | -1.03624300 | -0.57894800 |
|   |             |             |             | H | -4.74941400 | 1.94614700  | -1.68106700 |
|   |             |             |             | H | -4.60728200 | 3.13075400  | -0.36067100 |
|   |             |             |             | H | -1.48651600 | -2.18685900 | -1.69003200 |
|   |             |             |             | H | -0.76937900 | -0.62069600 | -1.22659000 |
|   |             |             |             | H | -1.49421800 | -1.04148300 | 2.09339000  |
|   |             |             |             | H | -2.83778700 | -0.98763900 | 3.26872700  |

**TS<sub>B16-21</sub>**

**E= -1383.43217554 a.u.**

|    |             |             |             |
|----|-------------|-------------|-------------|
| Rh | 1.78464400  | 0.28486500  | -0.50848000 |
| P  | 0.55393800  | 2.13228300  | -0.96300600 |
| P  | 1.75632000  | 0.86269700  | 1.71655900  |
| C  | -0.47746300 | 2.81108900  | 0.46850900  |
| H  | 0.11639100  | 3.55158500  | 1.02241600  |
| H  | -1.34271800 | 3.34368100  | 0.06193700  |
| C  | 0.04859200  | 1.29828800  | 2.37226200  |
| H  | -0.35244400 | 0.39882300  | 2.84592500  |
| H  | 0.16483800  | 2.04928700  | 3.16750800  |
| P  | 1.72690200  | -2.03803200 | -0.23964500 |
| P  | 4.13333600  | 0.29310600  | -0.97177800 |
| C  | 3.25899300  | -2.75701900 | 0.59630800  |
| C  | 3.49687200  | -3.72403600 | 0.10864500  |
| H  | 2.96925500  | -2.98723000 | 1.62834600  |
| C  | 4.86940500  | -1.39657200 | -0.65222100 |
| H  | 5.96222800  | -1.31662000 | -0.65985800 |
| C  | 4.60256400  | -2.08402500 | -1.47181300 |
| N  | -0.98711100 | 1.79310000  | 1.42257800  |
| N  | 4.42550400  | -1.88666200 | 0.65489600  |
| C  | -2.06612600 | 2.38861900  | 2.24388900  |
| C  | -2.88179000 | 2.71613400  | 1.60139700  |
| H  | -2.45256100 | 1.63030600  | 2.93093600  |
| H  | -1.68515800 | 3.23547800  | 2.82601400  |
| C  | 5.49724000  | -2.52085100 | 1.41109100  |
| H  | 6.33201000  | -1.82328500 | 1.52266500  |
| H  | 5.13690300  | -2.77736700 | 2.41256500  |
| H  | 5.87404100  | -3.44419200 | 0.93592500  |
| C  | 0.45495400  | -2.98752800 | 0.72735800  |
| H  | 0.41746400  | -2.61080100 | 1.75319800  |
| H  | -0.52924200 | -2.83488300 | 0.27634000  |
| H  | 0.67130800  | -4.06156800 | 0.75293500  |
| C  | 2.69733000  | 2.35577300  | 2.27677300  |
| H  | 2.42611900  | 3.22270100  | 1.66900100  |
| H  | 2.52182200  | 2.58586100  | 3.33269200  |
| C  | 3.76306100  | 2.17057500  | 2.12798000  |
| H  | 2.25840800  | -0.32341700 | 3.03932500  |
| C  | 3.29350000  | -0.61171800 | 2.83251400  |
| H  | 2.18526400  | 0.10689900  | 4.04301600  |
| H  | 1.64245500  | -1.22485300 | 2.98704900  |
| C  | 4.69741700  | 0.58439600  | -2.70609900 |
| H  | 5.76389800  | 0.37581300  | -2.84443400 |
| H  | 4.10918100  | -0.04481400 | -3.37900500 |
| H  | 4.50374400  | 1.62758800  | -2.97114400 |
| C  | 5.36628700  | 1.30358200  | -0.02608400 |
| H  | 5.08261600  | 2.35935100  | -0.04196100 |
| H  | 5.37455000  | 0.95865500  | 1.01259400  |

**TS<sub>B20-22</sub>**

**E= -990.97386486 a.u.**

|    |             |             |             |
|----|-------------|-------------|-------------|
| Rh | 0.00011700  | 0.04609600  | -0.24351700 |
| P  | 1.67175100  | -1.32861000 | -1.03390500 |
| P  | 0.63518000  | -0.19871800 | 2.06105300  |
| C  | 3.32983400  | -0.88223800 | -0.23509600 |
| H  | 3.85826800  | -1.75958900 | 0.14748600  |
| C  | 3.94776300  | -0.38915900 | -0.98670900 |
| H  | 2.50372300  | -0.50316800 | 2.10803300  |
| H  | 2.96414700  | -0.06242100 | 2.99535300  |
| H  | 2.71202400  | -1.57579600 | 2.11747000  |
| P  | -1.57969000 | 1.73201000  | -0.25433600 |
| C  | -1.72241100 | -1.43285200 | -0.74381800 |
| P  | -3.21287300 | 1.37440600  | 0.58329500  |
| H  | -4.00273900 | 1.92367500  | 0.03379900  |
| H  | -3.15205100 | 1.81529000  | 1.58446200  |
| C  | -3.45036700 | -0.76817500 | -0.52848700 |
| H  | -4.12283000 | -1.63151000 | -0.49488000 |
| H  | -3.75395500 | -0.17011400 | -1.40486600 |
| N  | 3.18240800  | 0.08918100  | 0.89692600  |
| N  | -3.53931000 | -0.03644300 | 0.72741100  |
| C  | 4.48600800  | 0.72961600  | 1.22897300  |
| H  | 4.87228700  | 1.21187700  | 0.33194800  |
| H  | 4.32133500  | 1.47853800  | 2.00439700  |
| H  | 5.17614800  | -0.03560200 | 1.58738100  |
| C  | -4.82892500 | -0.20149600 | 1.38840100  |
| H  | -5.01719400 | -1.26285600 | 1.57067000  |
| H  | -4.80873100 | 0.30849400  | 2.35560800  |
| H  | -5.66728800 | 0.20939000  | 0.79960500  |
| C  | -1.13293300 | 3.32112900  | 0.55562200  |
| H  | -0.87559600 | 3.14785300  | 1.60272200  |
| H  | -0.27026600 | 3.74592300  | 0.03885000  |
| C  | -1.96283800 | 4.03254500  | 0.50331700  |
| H  | 0.12090500  | -1.61749900 | 3.13135400  |
| H  | 0.24975800  | -2.55778700 | 2.58900600  |
| H  | 0.66824900  | -1.66309100 | 4.07858600  |
| H  | -0.94476400 | -1.50306500 | 3.34852700  |
| C  | 0.52874500  | 1.18561900  | 3.28678200  |
| H  | -0.52800900 | 1.40409100  | 3.46626500  |
| H  | 1.00275300  | 0.94831600  | 4.24495800  |
| H  | 0.98753800  | 2.08523200  | 2.86592600  |
| C  | -1.84511600 | -2.15779600 | -2.43649000 |

|   |             |             |             |
|---|-------------|-------------|-------------|
| H | -2.74513200 | -2.77054400 | -2.55073100 |
| H | -1.85851900 | -1.35139700 | -3.17393600 |
| H | -0.97224800 | -2.78404000 | -2.64081100 |
| C | -1.86178300 | -2.92390000 | 0.33739000  |
| H | -0.90499600 | -3.44431900 | 0.40893600  |
| H | -2.14320400 | -2.58023700 | 1.33641700  |
| H | -2.62037500 | -3.62154800 | -0.03130300 |
| C | 2.16020400  | -1.25481100 | -2.80700300 |
| H | 1.31830700  | -1.60035800 | -3.41199400 |
| H | 2.36363800  | -0.21565200 | -3.07342700 |
| H | 3.03692000  | -1.87323600 | -3.02443900 |
| C | 1.66182300  | -3.15008300 | -0.73032900 |
| H | 2.58275800  | -3.62578700 | -1.08010200 |
| H | 1.53506900  | -3.34755700 | 0.33784500  |
| H | 0.81973000  | -3.60414500 | -1.25887400 |
| C | -2.06646000 | 2.30710100  | -1.93257200 |
| H | -2.46998800 | 1.47566900  | -2.51470000 |
| H | -2.80933500 | 3.10935300  | -1.88132600 |
| H | -1.16675800 | 2.67307700  | -2.43230400 |
| H | 1.03540500  | 1.35277100  | -0.62035600 |
| H | 2.55465500  | 0.82139200  | 0.51456500  |
| C | 1.95106800  | 2.35958800  | -1.48281400 |
| O | 3.06392800  | 1.96702100  | -1.25255800 |
| O | 1.20451600  | 3.12743000  | -1.98902900 |

**C1**

**E=-1087.54718730 a.u.**

|    |             |             |             |
|----|-------------|-------------|-------------|
| Rh | -0.00007300 | 0.00012500  | 0.00004200  |
| P  | -1.58345000 | -1.71591000 | -0.33925700 |
| P  | -1.67868700 | 1.58993400  | -0.43208800 |
| C  | -3.38984700 | -1.46296200 | 0.07818200  |
| H  | -3.98538700 | -1.85490700 | -0.75203800 |
| H  | -3.62628300 | -2.06203800 | 0.96139400  |
| C  | -3.43551100 | 1.00626100  | -0.62954500 |
| H  | -4.10016200 | 1.86856900  | -0.52096100 |
| H  | -3.57301900 | 0.61278100  | -1.64165000 |
| P  | 1.58360900  | 1.71586100  | 0.33920700  |
| C  | 1.67865800  | -1.58958500 | 0.43269400  |
| P  | 3.38937000  | 1.46293700  | -0.08076000 |
| H  | 3.98608200  | 1.85624200  | 0.74798000  |
| H  | 3.62414000  | 2.06088900  | -0.96517800 |
| C  | 3.43554600  | -1.00569100 | 0.62923200  |
| H  | 4.10021000  | -1.86805100 | 0.52116300  |
| H  | 3.57340800  | -0.61132700 | 1.64094200  |
| C  | 1.45605400  | 3.40758000  | -0.39438200 |
| H  | 1.55884100  | 3.33754100  | -1.48033500 |
| H  | 0.51021000  | 3.89546400  | -0.16128900 |
| H  | 2.26731900  | 4.03237700  | -0.00943400 |
| C  | -1.53067100 | 2.50778900  | -2.02229200 |
| H  | -1.51406500 | 1.78971500  | -2.84603700 |
| H  | -2.37229900 | 3.19326500  | -2.15804200 |
| H  | -0.60268200 | 3.07710800  | -2.05736600 |
| C  | -1.93561400 | 2.90529500  | 0.83515600  |
| H  | -1.00491200 | 3.41641500  | 1.08076900  |
| H  | -2.66017800 | 3.64462700  | 0.48162600  |
| H  | -2.31863300 | 2.43779400  | 1.74377600  |
| C  | 1.53076500  | -2.50600300 | 2.02373300  |
| H  | 2.37207600  | -3.19180000 | 2.15980900  |
| H  | 1.51478700  | -1.78722300 | 2.84687400  |
| H  | 0.60245900  | -3.07477000 | 2.05960200  |
| C  | 1.93553400  | -2.90612200 | -0.83337700 |
| H  | 1.00492500  | -3.41771300 | -1.07835600 |
| H  | 2.31834300  | -2.43940400 | -1.74249000 |
| H  | 2.66030300  | -3.64496900 | -0.47925300 |
| C  | -1.45618600 | -3.40679600 | 0.39626500  |
| H  | -0.50995200 | -3.89463600 | 0.16470300  |
| H  | -1.56008000 | -3.33551200 | 1.48203300  |
| H  | -2.26684800 | -4.03230300 | 0.01120100  |
| C  | -1.66114000 | -2.08604600 | -2.14460600 |
| H  | -2.36933500 | -2.89078200 | -2.36275600 |
| H  | -1.95909600 | -1.18698000 | -2.69016100 |
| H  | -0.66869800 | -2.37106200 | -2.50169100 |
| C  | 1.66333900  | 2.08443300  | 2.14478700  |
| H  | 1.96114200  | 1.18479000  | 2.68945300  |
| H  | 2.37225000  | 2.88854500  | 2.36290600  |
| H  | 0.67140800  | 2.36987700  | 2.50296700  |
| C  | 3.85726100  | 0.05399400  | -0.36631000 |
| H  | -3.85768100 | -0.05425900 | 0.36489500  |
| F  | 5.22632400  | 0.07325900  | -0.43175700 |
| F  | 3.43257100  | -0.30627700 | -1.62866400 |
| F  | -3.43347600 | 0.30480300  | 1.62774800  |
| F  | -5.22677900 | -0.07346300 | 0.42975600  |

**TS<sub>B7-8'</sub>**

**E= -991.74336507 a.u.**

|    |             |             |             |
|----|-------------|-------------|-------------|
| P  | 1.30589000  | 1.69706000  | -0.65988100 |
| P  | 1.40669200  | -0.96579500 | 1.27310300  |
| C  | 3.10145500  | 1.25468300  | -0.56489600 |
| H  | 3.30872600  | 0.48086200  | -1.32039400 |
| H  | 3.66020900  | 2.15727700  | -0.83689400 |
| C  | 3.20866500  | -0.56357000 | 1.02288500  |
| H  | 3.72479500  | -0.86851500 | 1.94097900  |
| H  | 3.58390900  | -1.19568300 | 0.19929500  |
| P  | -1.72470600 | -1.71774000 | 0.04386800  |
| P  | -1.93406200 | 1.49563000  | 0.38836200  |
| C  | -3.33746000 | -1.27454400 | -0.76538800 |
| H  | -3.92920300 | -2.19008500 | -0.90674500 |
| H  | -3.01729900 | -0.93381500 | -1.76635600 |
| C  | -3.56460700 | 0.66585200  | 0.81860800  |
| H  | -4.30677800 | 1.44478800  | 1.02647500  |
| H  | -3.37125500 | 0.17485900  | 1.78171500  |
| C  | -1.30916000 | -3.21141600 | -0.94802800 |
| H  | -1.14210400 | -2.90580100 | -1.98328300 |
| H  | -0.38078200 | -3.64789200 | -0.57309300 |
| C  | -2.10518400 | -3.96116100 | -0.90139100 |
| H  | 1.62400900  | -2.80361300 | 1.36134500  |
| H  | 1.94024800  | -3.17422400 | 0.38239200  |
| H  | 2.38937000  | -3.07191800 | 2.09749100  |
| H  | 0.69020100  | -3.29515800 | 1.64351500  |
| C  | 1.20680700  | -0.55145400 | 3.06548100  |
| H  | 0.19364400  | -0.81172800 | 3.38418900  |
| H  | 1.93423600  | -1.07427100 | 3.69695900  |
| H  | 1.33468200  | 0.52785700  | 3.18313900  |
| C  | -1.81556700 | 2.50816800  | 1.93823700  |
| H  | -0.96586000 | 3.19077200  | 1.88140000  |
| H  | -2.72660600 | 3.09002500  | 2.12045600  |
| H  | -1.64112000 | 1.83217100  | 2.77978800  |
| C  | -2.48085800 | 2.78844700  | -0.82299600 |
| H  | -1.67645300 | 3.51419400  | -0.97632400 |
| H  | -2.68193400 | 2.30907600  | -1.78452500 |
| H  | -3.37584500 | 3.32193100  | -0.48410600 |
| C  | 1.31426600  | 3.27927300  | 0.28839800  |
| H  | 0.35219300  | 3.78784000  | 0.19124300  |
| H  | 1.50226300  | 3.06232600  | 1.34237100  |
| H  | 2.09853300  | 3.94572700  | -0.08454300 |
| C  | 1.17519100  | 2.27875600  | -2.39905100 |
| H  | 1.88045100  | 3.09280900  | -2.59645500 |
| H  | 1.39465800  | 1.43280200  | -3.05435900 |
| H  | 0.15630800  | 2.62078100  | -2.59551700 |
| C  | -2.24913300 | -2.48214100 | 1.64262500  |
| H  | -2.58213400 | -1.71611600 | 2.34495000  |
| H  | -3.06094700 | -3.19829000 | 1.48448400  |
| H  | -1.40011200 | -3.00300300 | 2.09212700  |
| H  | 0.62763900  | -0.67883900 | -2.18912500 |
| O  | -0.27466700 | -0.44167000 | -1.90354800 |
| H  | 1.83338000  | -0.90914400 | -2.64888200 |
| C  | 2.25106200  | -2.04359100 | -2.20934200 |
| H  | 1.44568900  | -2.79262600 | -2.03068600 |
| O  | 3.41227700  | -2.35161200 | -1.95324300 |
| Rh | -0.20879600 | 0.01591300  | -0.12289600 |
| N  | -4.17266500 | -0.28355600 | -0.09804200 |
| C  | 3.48008800  | 0.85317600  | 0.79073300  |
| N  | -5.12574100 | 0.29404000  | -1.02855200 |
| H  | -5.83412200 | 0.93081500  | -0.49070400 |
| H  | -4.65285200 | 0.89089000  | -1.82901500 |
| H  | -5.69426700 | -0.51066800 | -1.50629000 |
| C  | 4.88617600  | 1.14660200  | 1.04744900  |
| H  | 5.12716600  | 0.89898300  | 2.08558300  |
| H  | 5.56533500  | 0.58142600  | 0.38543200  |
| H  | 5.07005700  | 2.21560800  | 0.90541100  |

**C1-H<sub>2</sub>**

**E= -1088.72523327 a.u.**

|    |             |             |             |
|----|-------------|-------------|-------------|
| Rh | 0.04433500  | 0.14143100  | -0.82840000 |
| P  | -2.00291200 | 1.27489200  | -0.72194300 |
| P  | -0.96353400 | -1.72826900 | 0.25214800  |
| C  | -3.05799800 | 1.02569600  | 0.78000000  |
| H  | -2.54815200 | 1.49013500  | 1.62927600  |
| H  | -4.00921800 | 1.54806100  | 0.63507600  |
| C  | -2.23334600 | -1.31560100 | 1.55047000  |
| H  | -2.67376700 | -2.24631100 | 1.92330000  |
| H  | -1.69910000 | -0.84432600 | 2.38171200  |
| P  | 2.07708400  | -0.94502400 | -1.16696400 |
| C  | 1.22623600  | 1.76857500  | 0.44161300  |
| H  | 3.19911200  | -1.19032000 | 0.29426200  |
| H  | 4.23047000  | -1.21646300 | -0.07067700 |
| H  | 2.98864700  | -2.16478400 | 0.74291500  |
| C  | 2.94772500  | 1.30117700  | 1.00423800  |
| H  | 3.21229300  | 1.92064000  | 1.86677800  |
| H  | 3.66285900  | 1.53661100  | 0.21033400  |
| C  | 2.06703500  | -2.61835400 | -1.92632700 |
| H  | 1.50619500  | -3.32588900 | -1.31423000 |
| H  | 1.57734700  | -2.54828600 | -2.90106600 |
| C  | 3.08449700  | -2.99494300 | -2.06469000 |
| H  | 0.08123400  | -2.82800900 | 1.30273700  |
| H  | 0.79455400  | -3.37851700 | 0.68617300  |
| H  | 0.63591400  | -2.23055200 | 2.02721700  |
| C  | -0.54069500 | -3.55844400 | 1.82814800  |
| H  | -1.83542500 | -2.96793400 | -0.79598200 |
| H  | -1.11624900 | -3.39465000 | -1.50046300 |
| H  | -2.27286600 | -3.77090900 | -0.19522900 |
| H  | -2.62737300 | -2.48362600 | -1.36888400 |
| C  | 1.62863400  | 3.40715900  | -0.30522600 |

|   |             |             |             |    |             |             |             |
|---|-------------|-------------|-------------|----|-------------|-------------|-------------|
| H | 2.23918000  | 4.01907100  | 0.36589600  | Rh | 1.56307900  | 0.14850100  | -0.49342300 |
| H | 2.16449700  | 3.25520200  | -1.24566400 | P  | 1.18251100  | 2.27754500  | -1.35586900 |
| H | 0.70711600  | 3.94655600  | -0.53183900 | P  | 1.33023300  | 0.78745200  | 1.83794600  |
| C | 0.46559200  | 2.25582900  | 2.04924000  | C  | 1.05698000  | 3.71203500  | -0.18603600 |
| H | -0.51155200 | 2.71202400  | 1.87464700  | H  | 2.06805100  | 4.07578700  | 0.02079600  |
| H | 0.33047400  | 1.36434800  | 2.66441900  | H  | 0.51329200  | 4.51922500  | -0.68737000 |
| H | 1.09016400  | 2.97373300  | 2.58888600  | C  | 1.13698600  | 2.61546900  | 2.15071600  |
| C | -3.09794700 | 0.84919600  | -2.13317600 | H  | 0.64313500  | 2.74222200  | 3.11937200  |
| H | -2.63032400 | 1.21868800  | -3.04965400 | H  | 2.14052400  | 3.04306300  | 2.24187300  |
| H | -3.21183300 | -0.23179000 | -2.21269400 | P  | 1.29461300  | -2.16069900 | -0.32151400 |
| H | -4.08382800 | 1.30766600  | -2.02009300 | P  | 3.95374300  | -0.11169700 | -0.77319700 |
| C | -2.00622700 | 3.11263300  | -0.81596500 | C  | 2.57793900  | -3.15813200 | 0.59312300  |
| H | -3.02904700 | 3.48980100  | -0.90367200 | H  | 2.64953500  | -4.13937100 | 0.11394700  |
| H | -1.54699200 | 3.55574600  | 0.07013500  | H  | 2.23219900  | -3.32333400 | 1.61779100  |
| H | -1.43883900 | 3.42163900  | -1.69751900 | C  | 4.56611200  | -1.85818700 | -0.51373600 |
| C | 3.13961900  | -0.03307300 | -2.36173100 | H  | 5.65337300  | -1.83296900 | -0.39084500 |
| H | 3.30871400  | 0.99111800  | -2.02404100 | C  | 4.35657000  | -2.43790900 | -1.41796700 |
| H | 4.10258100  | -0.53201300 | -2.50392200 | H  | -0.26761100 | -2.78573500 | 0.40410600  |
| H | 2.61817200  | 0.01656100  | -3.32097700 | H  | -0.30567800 | -2.56241200 | 1.47164100  |
| H | 0.11722400  | 0.67316000  | -2.54736400 | H  | -1.10209400 | -2.26311500 | -0.07502200 |
| H | -0.26688600 | -0.09135700 | -2.59004200 | H  | -0.36549200 | -3.86548800 | 0.25844500  |
| C | 3.12651300  | -0.14992400 | 1.40556900  | C  | 2.58508700  | 0.47006700  | 3.14937700  |
| C | -3.38024500 | -0.40998700 | 1.15108800  | H  | 3.54425300  | 0.92251500  | 2.89024400  |
| F | -4.07503400 | -0.99254200 | 0.11086900  | H  | 2.24209100  | 0.89146600  | 4.09927600  |
| F | -4.26028200 | -0.36804200 | 2.20260300  | H  | 2.73411700  | -0.60274100 | 3.27019300  |
| F | 2.11231500  | -0.49064100 | 2.28099800  | C  | -0.16716000 | 0.07964500  | 2.62915400  |
| F | 4.28099900  | -0.25720200 | 2.13639600  | H  | 0.04065900  | -0.96594200 | 2.87523300  |
|   |             |             |             | H  | -0.40657200 | 0.60429500  | 3.55877500  |
|   |             |             |             | H  | -1.02246700 | 0.11116600  | 1.94589200  |
|   |             |             |             | C  | 4.60374900  | 0.14493200  | -2.47794300 |
|   |             |             |             | H  | 5.63805400  | -0.20064500 | -2.56516400 |
|   |             |             |             | H  | 3.97629100  | -0.39630800 | -3.19023000 |
|   |             |             |             | C  | 4.57040400  | 1.20599800  | -2.73100100 |
|   |             |             |             | C  | 5.13808200  | 0.87223700  | 0.23537300  |
|   |             |             |             | H  | 4.91696800  | 1.93539200  | 0.10522800  |
|   |             |             |             | H  | 5.02198900  | 0.61596100  | 1.28924200  |
|   |             |             |             | H  | 6.17376300  | 0.68541300  | -0.06285200 |
|   |             |             |             | C  | -0.38746400 | 2.35921200  | -2.29149300 |
|   |             |             |             | H  | -0.32056300 | 1.66700800  | -3.13477900 |
|   |             |             |             | H  | -1.20288500 | 2.02591900  | -1.64280700 |
|   |             |             |             | H  | -0.57876800 | 3.37040000  | -2.66163500 |
|   |             |             |             | C  | 2.39670200  | 2.96641600  | -2.55180300 |
|   |             |             |             | H  | 2.05370400  | 3.93159200  | -2.93593700 |
|   |             |             |             | H  | 3.36979300  | 3.10325300  | -2.07287700 |
|   |             |             |             | C  | 2.50641200  | 2.27139100  | -3.38738300 |
|   |             |             |             | H  | 1.31408500  | -2.97253200 | -1.97194100 |
|   |             |             |             | H  | 2.27150500  | -2.79139000 | -2.46565900 |
|   |             |             |             | H  | 1.14705900  | -4.05028700 | -1.88706100 |
|   |             |             |             | H  | 0.53325600  | -2.52668700 | -2.59013200 |
|   |             |             |             | H  | 1.42711800  | -0.16616400 | -2.03578300 |
|   |             |             |             | H  | -0.00879000 | 0.14813700  | -0.48102300 |
|   |             |             |             | H  | -3.20256600 | 0.20229000  | -0.44563100 |
|   |             |             |             | P  | -4.71360400 | 1.00971600  | -0.76636800 |
|   |             |             |             | N  | -3.18531800 | -0.17357700 | 1.26351800  |
|   |             |             |             | N  | -3.11487400 | -1.35695800 | -1.20705100 |
|   |             |             |             | C  | -3.55350500 | 0.96487300  | 2.09443100  |
|   |             |             |             | C  | -3.13805400 | 1.88382700  | 1.67045600  |
|   |             |             |             | H  | -2.25039500 | -1.38188100 | -2.38304500 |
|   |             |             |             | C  | -2.81906900 | -1.33678400 | -3.32323600 |
|   |             |             |             | H  | -4.56029100 | 2.18783400  | -1.61620700 |
|   |             |             |             | C  | -3.54864400 | 2.58979900  | -1.52460600 |
|   |             |             |             | H  | -3.86466900 | -2.60774900 | -1.05172000 |
|   |             |             |             | H  | -3.32477500 | -3.28290200 | -0.36966600 |
|   |             |             |             | H  | -3.87534800 | -3.11695200 | -2.02322300 |
|   |             |             |             | C  | -5.32791000 | -2.48807000 | -0.60024300 |
|   |             |             |             | H  | -5.93453700 | -2.17859600 | -1.45576600 |
|   |             |             |             | H  | -5.66692700 | -3.50302900 | -0.32672000 |
|   |             |             |             | C  | -3.50589400 | -1.46752300 | 1.83540200  |
|   |             |             |             | H  | -2.91316900 | -2.22917600 | 1.32418100  |
|   |             |             |             | C  | -3.17448400 | -1.47125500 | 2.88324900  |
|   |             |             |             | H  | -5.00284600 | -1.83176000 | 1.76270000  |
|   |             |             |             | H  | -5.13114600 | -2.89413300 | 2.02684200  |
|   |             |             |             | H  | -5.55857200 | -1.25537300 | 2.50929400  |
|   |             |             |             | C  | -6.05171700 | 0.44822600  | -0.89299000 |
|   |             |             |             | H  | -6.15832800 | -0.07753000 | -1.85784800 |
|   |             |             |             | H  | -6.76952500 | 1.27806800  | -0.92576800 |
|   |             |             |             | C  | -6.46557000 | -0.46369500 | 0.25369400  |
|   |             |             |             | H  | -6.50846200 | 0.12656400  | 1.17332600  |
|   |             |             |             | H  | -7.49139400 | -0.81807300 | 0.04999000  |
|   |             |             |             | N  | -5.54519900 | -1.55224100 | 0.46343400  |
|   |             |             |             | H  | -4.63904800 | 1.10821300  | 2.18933700  |
|   |             |             |             | H  | -3.13106900 | 0.83368700  | 3.09817200  |
|   |             |             |             | H  | -5.26174600 | 2.97007200  | -1.30218900 |
|   |             |             |             | H  | -4.75065600 | 1.96947900  | -2.67933400 |
|   |             |             |             | H  | -1.54965400 | -0.54316200 | -2.35644400 |
|   |             |             |             | C  | -1.66286000 | -2.31062100 | -2.40006100 |
|   |             |             |             | H  | 0.37017100  | 3.44106800  | 1.13847500  |
|   |             |             |             | C  | -0.86015700 | 2.86806000  | 0.90918300  |
|   |             |             |             | F  | 0.10868200  | 4.66031200  | 1.71872300  |
|   |             |             |             | F  | 3.98772200  | -2.58772000 | 0.68633800  |
|   |             |             |             | F  | 4.82617100  | -3.62854500 | 0.99636700  |
|   |             |             |             | F  | 4.04992100  | -1.73753200 | 1.77422200  |

**C2**

**E=-1088.74051146 a.u.**

|    |             |             |             |  |  |  |  |
|----|-------------|-------------|-------------|--|--|--|--|
| Rh | 0.09797400  | 0.24233500  | 0.62277600  |  |  |  |  |
| P  | 2.09655700  | 1.41563900  | 0.36651400  |  |  |  |  |
| P  | 0.78051000  | -1.36499700 | -1.04323100 |  |  |  |  |
| C  | 3.43413800  | 0.51272100  | -0.55702100 |  |  |  |  |
| H  | 3.26110200  | 0.62588300  | -1.63211000 |  |  |  |  |
| H  | 4.39301300  | 0.98865900  | -0.32921400 |  |  |  |  |
| C  | 2.54639700  | -1.92927200 | -0.83653600 |  |  |  |  |
| H  | 2.54207100  | -2.81918300 | -0.20066400 |  |  |  |  |
| H  | 2.92385800  | -2.23328100 | -1.81740100 |  |  |  |  |
| P  | -1.68851200 | -0.90021600 | 1.58797600  |  |  |  |  |
| P  | -1.45527700 | 1.64947100  | -0.60467500 |  |  |  |  |
| C  | -3.12032000 | -1.35035100 | 0.48115900  |  |  |  |  |
| H  | -4.03637400 | -1.33469100 | 1.08008800  |  |  |  |  |
| H  | -2.98356700 | -2.37693200 | 0.12907900  |  |  |  |  |
| C  | -3.21622400 | 1.02504300  | -0.58670100 |  |  |  |  |
| H  | -3.76787700 | 1.50095100  | -1.40298900 |  |  |  |  |
| H  | -3.69663600 | 1.32978200  | 0.34787200  |  |  |  |  |
| C  | -1.34406800 | -2.50279100 | 2.40864600  |  |  |  |  |
| H  | -0.94620900 | -3.22062400 | 1.68972000  |  |  |  |  |
| H  | -0.59278900 | -2.34031500 | 3.18465500  |  |  |  |  |
| H  | -2.25167000 | -2.91316900 | 2.86030700  |  |  |  |  |
| C  | 0.75071500  | -0.82515500 | -2.80616100 |  |  |  |  |
| H  | 1.19810400  | 0.16567300  | -2.91728400 |  |  |  |  |
| H  | 1.28266200  | -1.53259000 | -3.44863400 |  |  |  |  |
| H  | -0.28904300 | -0.77223100 | -3.13606000 |  |  |  |  |
| C  | -0.03444400 | -3.00945200 | -1.17380900 |  |  |  |  |
| H  | -1.09022300 | -2.86948300 | -1.41332100 |  |  |  |  |
| H  | 0.43013600  | -3.61205000 | -1.95968100 |  |  |  |  |
| H  | 0.05572500  | -3.54710000 | -0.22616300 |  |  |  |  |
| C  | -1.70834800 | 3.30987900  | 0.14698900  |  |  |  |  |
| H  | -2.54206500 | 3.84150600  | -0.32075300 |  |  |  |  |
| H  | -1.89454000 | 3.19987000  | 1.21763900  |  |  |  |  |
| H  | -0.80063100 | 3.90453600  | 0.02289000  |  |  |  |  |
| H  | -1.25415000 | 2.07064400  | -2.38681600 |  |  |  |  |
| C  | -0.25982300 | 2.48674600  | -2.56183800 |  |  |  |  |
| H  | -1.37062300 | 1.17388000  | -2.99599900 |  |  |  |  |
| H  | -2.00072200 | 2.80787900  | -2.69567800 |  |  |  |  |
| C  | 2.88973700  | 1.85842100  | 1.95574200  |  |  |  |  |
| H  | 2.21137700  | 2.51030100  | 2.51087900  |  |  |  |  |
| H  | 3.05225000  | 0.95096100  | 2.53782100  |  |  |  |  |
| C  | 3.84285000  | 2.36965400  | 1.79454900  |  |  |  |  |
| C  | 2.10454500  | 3.01285700  | -0.54277200 |  |  |  |  |
| H  | 3.11964900  | 3.41298900  | -0.61917700 |  |  |  |  |
| H  | 1.69937600  | 2.88173700  | -1.54862900 |  |  |  |  |
| H  | 1.48762700  | 3.73567400  | -0.00385800 |  |  |  |  |
| C  | -2.50292600 | 0.04745000  | 2.93494300  |  |  |  |  |
| H  | -2.85261400 | 1.01212400  | 2.56072400  |  |  |  |  |
| H  | -3.34475000 | -0.50494900 | 3.36193300  |  |  |  |  |
| H  | -1.76104600 | 0.24198500  | 3.71272700  |  |  |  |  |
| H  | -0.11212200 | 1.23672300  | 1.83141600  |  |  |  |  |
| H  | 0.97333700  | -0.56563300 | 1.64974800  |  |  |  |  |
| C  | 3.56182300  | -0.96691200 | -0.23147200 |  |  |  |  |
| C  | -3.35684300 | -0.47904300 | -0.74390700 |  |  |  |  |
| F  | 4.80476300  | -1.37806500 | -0.64633200 |  |  |  |  |
| F  | 3.56553900  | -1.11831500 | 1.13655000  |  |  |  |  |
| F  | -2.50730000 | -0.89490000 | -1.75981500 |  |  |  |  |
| F  | -4.61722500 | -0.75154500 | -1.20373700 |  |  |  |  |

**C3**

**E=-1669.72744369 a.u.**

C4

E=-1669.72513643 a.u.

|    |             |             |             |
|----|-------------|-------------|-------------|
| Rh | 1.77564900  | 0.24963900  | -0.50817500 |
| F  | 0.68193600  | 2.01107100  | -1.43631900 |
| P  | 1.94184100  | 1.17350300  | 1.64270500  |
| C  | 0.08108400  | 3.42957000  | -0.35758900 |
| H  | 0.82543600  | 4.23040900  | -0.40186100 |
| H  | -0.84953100 | 3.83700300  | -0.76639800 |
| C  | 1.06985400  | 2.81032100  | 1.94309400  |
| H  | 0.77814700  | 2.87315100  | 2.99621500  |
| H  | 1.79828400  | 3.60701500  | 1.76273600  |
| P  | 1.38625400  | -2.00236500 | 0.01676900  |
| F  | 4.06569500  | -0.10173000 | -1.08018600 |
| C  | 2.81278400  | -2.92968400 | 0.82874900  |
| H  | 2.83682900  | -3.94996800 | 0.43185500  |
| H  | 2.61766200  | -3.00984100 | 1.90284300  |
| C  | 4.67456800  | -1.82949000 | -0.65662500 |
| H  | 5.76923300  | -1.85193400 | -0.66677600 |
| H  | 4.32992300  | -2.51992600 | -1.43302200 |
| C  | 0.03844400  | -2.70988800 | 1.08509200  |
| H  | 0.11415300  | -2.27877700 | 2.08662600  |
| H  | -0.93721200 | -2.43746900 | 0.67284600  |
| C  | 0.10481600  | -3.80115600 | 1.16245700  |
| H  | 3.57369600  | 1.68077800  | 2.34795400  |
| C  | 4.07743600  | 2.35400000  | 1.65013300  |
| H  | 3.45160900  | 2.18542700  | 3.31184100  |
| H  | 4.19557600  | 0.79518300  | 2.48701800  |
| C  | 1.29709900  | 0.18744700  | 3.06878600  |
| H  | 1.84642600  | -0.75765200 | 3.10867400  |
| H  | 1.42439200  | 0.70844500  | 4.02292100  |
| H  | 0.23787000  | -0.02673500 | 2.91302800  |
| C  | 4.43630600  | -0.12545800 | -2.89128900 |
| H  | 5.45678900  | -0.45955100 | -3.10702000 |
| H  | 3.71922400  | -0.77893600 | -3.39431600 |
| H  | 4.30216500  | 0.88524900  | -3.28715400 |
| C  | 5.51211500  | 0.88742000  | -0.47798900 |
| H  | 5.33427600  | 1.94670000  | -0.68383500 |
| H  | 5.62769100  | 0.75747500  | 0.59918200  |
| C  | 6.44026200  | 0.58012200  | -0.97157200 |
| H  | -0.83427100 | 1.74710400  | -2.47340900 |
| H  | -0.59036900 | 1.01664100  | -3.24910000 |
| H  | -1.64408700 | 1.33940800  | -1.86621600 |
| H  | -1.17392700 | 2.67529700  | -2.94596300 |
| C  | 1.65696200  | 3.00022600  | -2.66402200 |
| H  | 1.09694900  | 3.84847500  | -3.07278800 |
| H  | 2.57157300  | 3.36223500  | -2.18726800 |
| H  | 1.94520700  | 2.33360900  | -3.48152400 |
| C  | 1.19885000  | -3.07272100 | -1.48615000 |
| H  | 2.10245500  | -2.98133000 | -2.09418600 |
| H  | 1.03871600  | -4.12719400 | -1.23628900 |
| H  | 0.37085600  | -2.70679500 | -2.09510600 |
| H  | 1.51368400  | -0.26491800 | -1.99653800 |
| P  | -2.41186000 | 0.31038200  | 0.04714600  |
| P  | -3.68802700 | -0.28850100 | -0.02128900 |
| N  | -4.55937400 | 1.16961000  | -0.02669300 |
| N  | -3.53167900 | -1.16039100 | 1.43159800  |
| N  | -3.40091100 | -1.10762600 | -1.48392700 |
| C  | -2.58875300 | -0.68013200 | 2.43801600  |
| H  | -1.74293000 | -0.18652300 | 1.95738800  |
| C  | -2.03160000 | -1.48166100 | -1.83020400 |
| H  | -1.86866100 | -1.33822800 | -2.90319200 |
| C  | -3.89494200 | 2.41997300  | -0.38639800 |
| H  | -2.83936000 | 2.37865900  | -0.12297100 |
| C  | -4.39742200 | -1.99660600 | -2.04844700 |
| H  | -4.18638500 | -3.04249800 | -1.77495600 |
| H  | -4.37273400 | -1.94203500 | -3.14180600 |
| C  | -5.76047100 | -1.55704700 | -1.53990500 |
| H  | -6.09709000 | -0.67558700 | -2.08901800 |
| H  | -6.51876500 | -2.33980500 | -1.64068000 |
| C  | -4.65116400 | -1.90974700 | 1.96652000  |
| H  | -4.28830700 | -2.79733900 | 2.49482300  |
| H  | -5.21880500 | -1.30965900 | 2.69477400  |
| C  | -5.52196800 | -2.33072900 | 0.79261300  |
| H  | -5.05195900 | -3.16195800 | 0.26279100  |
| H  | -6.52648600 | -2.63676800 | 1.10125300  |
| C  | -5.99690600 | 1.18647100  | -0.20836300 |
| H  | -6.26081600 | 1.34774900  | -1.26519600 |
| H  | -6.43443500 | 2.01335400  | 0.36012100  |
| C  | -6.53716900 | -0.13585900 | 0.31020700  |
| H  | -6.55730800 | -0.12479200 | 1.40170500  |
| H  | -7.54534900 | -0.35372500 | -0.05585400 |
| N  | -5.58670900 | -1.17673900 | -0.12505100 |
| H  | -3.05890400 | 0.02748500  | 3.13356400  |
| H  | -2.20417600 | -1.53340300 | 3.00472600  |
| H  | -4.34190400 | 3.24096900  | 0.18174100  |
| H  | -3.99435500 | 2.63442900  | -1.45873100 |
| H  | -1.29344300 | -0.87309900 | -1.29876600 |
| H  | -1.85034600 | -2.53691000 | -1.58528100 |
| C  | -0.14725100 | 3.12033700  | 1.10518700  |
| C  | 4.21617300  | -2.35881500 | 0.69210600  |
| F  | 4.38168400  | -1.36568600 | 1.64602700  |
| F  | 5.09106700  | -3.35495800 | 1.07876500  |
| F  | -1.07435900 | 2.08840100  | 1.23557900  |
| F  | -0.78430700 | 4.21195200  | 1.66724800  |

C5

E=-1088.30481223 a.u.

|    |             |             |             |
|----|-------------|-------------|-------------|
| Rh | -0.00750900 | -0.28268200 | -0.41695600 |
| P  | -1.89567300 | -1.61339200 | -0.24649800 |
| P  | -0.94718600 | 1.84070100  | -0.13333200 |
| C  | -3.44708400 | -0.65756400 | -0.69094200 |
| H  | -3.44233100 | -0.53626300 | -1.77855700 |
| H  | -4.33400400 | -1.24314200 | -0.42353100 |
| C  | -2.76595200 | 1.86789400  | -0.58754800 |
| H  | -3.22924700 | 2.79745300  | -0.23797200 |
| H  | -2.82212400 | 1.85776700  | -1.68054300 |
| P  | 1.04525500  | -0.68792900 | 1.60821700  |
| F  | 1.98119400  | -0.43174200 | -1.53318800 |
| C  | 2.67898300  | 0.18620400  | 1.89710100  |
| H  | 3.32847800  | -0.46061700 | 2.49567300  |
| H  | 2.48386600  | 1.08806400  | 2.48502300  |
| C  | 3.55138200  | -0.32010000 | -0.50780500 |
| H  | 4.38484800  | 0.00194100  | -1.14051500 |
| C  | 3.79319300  | -1.31876800 | -0.12872200 |
| H  | 0.24125600  | -0.30915600 | 3.22812800  |
| H  | 0.00715500  | 0.75650100  | 3.27772500  |
| H  | -0.69679900 | -0.86549900 | 3.29580100  |
| H  | 0.88092200  | -0.57877400 | 4.07511200  |
| C  | -0.38851200 | 3.20713700  | -1.25037200 |
| H  | -0.39411900 | 2.84358200  | -2.28139800 |
| H  | -1.01397100 | 4.10389000  | -1.17162400 |
| H  | 0.64207100  | 3.46345400  | -0.98842200 |
| C  | -1.00348800 | 2.76349000  | 1.47369400  |
| H  | 0.01995600  | 2.91233200  | 1.83144600  |
| H  | -1.48804900 | 3.74071300  | 1.36887800  |
| H  | -1.55517400 | 2.17379900  | 2.20950200  |
| C  | 2.42622600  | -1.93863300 | -2.51678600 |
| H  | 3.41391000  | -1.86186400 | -2.98617100 |
| H  | 2.39469000  | -2.81610800 | -1.86517900 |
| H  | 1.66719400  | -2.07178700 | -3.29260300 |
| C  | 2.31474900  | 0.87327800  | -2.80003700 |
| H  | 1.52073200  | 0.82786000  | -3.55022700 |
| H  | 2.27569700  | 1.85187900  | -2.31796700 |
| H  | 3.28635100  | 0.74355500  | -3.28926200 |
| C  | -2.45765000 | -2.41033200 | 1.33064600  |
| H  | -1.71041500 | -3.14101800 | 1.65386900  |
| H  | -2.56157400 | -1.64535700 | 2.10304200  |
| H  | -3.41899200 | -2.92144900 | 1.20987500  |
| C  | -2.15321600 | -3.02908200 | -1.41387800 |
| H  | -3.16024400 | -3.45730600 | -1.34549300 |
| H  | -1.96832100 | -2.68039200 | -2.43303200 |
| H  | -1.41621500 | -3.80416700 | -1.18583800 |
| C  | 1.55576700  | -2.44285400 | 1.91399000  |
| H  | 2.20489200  | -2.77836400 | 1.10094200  |
| H  | 2.07122900  | -2.57262000 | 2.87192700  |
| H  | 0.66141200  | -3.07093200 | 1.89790400  |
| H  | -0.58447300 | -0.11933400 | -1.90801100 |
| C  | -3.61806800 | 0.71998200  | -0.07438800 |
| C  | 3.46919500  | 0.62670100  | 0.67357300  |
| F  | -4.94312500 | 1.08491900  | -0.27050200 |
| F  | -3.48665000 | 0.62750700  | 1.30272200  |
| F  | 2.99232500  | 1.84905200  | 0.24453700  |
| F  | 4.76211500  | 0.89022000  | 1.10225500  |

C6

E=-1276.83655279 a.u.

|    |             |             |             |
|----|-------------|-------------|-------------|
| Rh | 0.11024500  | 0.05763700  | -0.29349100 |
| P  | -1.68156800 | -0.64336400 | -1.58907400 |
| P  | -0.80154600 | -0.21737800 | 1.84677100  |
| C  | -3.30928900 | -0.34542200 | -0.70839600 |
| H  | -3.49059400 | 0.73301800  | -0.74535700 |
| H  | -4.12325700 | -0.83499100 | -1.25505700 |
| C  | -2.66608500 | -0.03626100 | 1.82110700  |
| H  | -3.09111100 | -0.34333700 | 2.78338900  |
| H  | -2.87273400 | 1.03079500  | 1.69318600  |
| P  | 1.57458400  | -1.72239900 | -0.52217600 |
| P  | 1.81461000  | 1.55315100  | -0.56408600 |
| C  | 3.22728500  | -1.56919200 | 0.35190500  |
| H  | 3.99014300  | -2.08727000 | -0.23801200 |
| C  | 3.15015500  | -2.08485600 | 1.31369700  |
| H  | 3.56881400  | 0.90340400  | -0.40725900 |
| H  | 4.24986000  | 1.72662100  | -0.16814900 |
| H  | 3.87836400  | 0.48925300  | -1.37266500 |
| C  | 1.13945800  | -3.43460200 | 0.01955800  |
| H  | 0.90232300  | -3.42907300 | 1.08588100  |
| H  | 0.25013900  | -3.76262600 | -0.52455000 |
| H  | 1.95392800  | -4.14261800 | -0.16618900 |
| C  | -0.44391100 | 1.05878800  | 3.13779900  |
| H  | -0.61063300 | 2.05038400  | 2.70941900  |
| H  | -1.06021800 | 0.93705200  | 4.03596600  |
| C  | 0.61187500  | 0.97869200  | 3.41229500  |
| H  | -0.62591200 | -1.75270700 | 2.87039400  |
| H  | 0.43694300  | -1.91292900 | 3.07739800  |
| H  | -1.16411600 | -1.67727800 | 3.82179700  |
| H  | -1.01023500 | -2.60929800 | 2.31216300  |

|   |             |             |             |
|---|-------------|-------------|-------------|
| C | 2.01824400  | 2.47990500  | -2.15548500 |
| H | 2.87597600  | 3.16235300  | -2.14599000 |
| H | 2.12407200  | 1.76357900  | -2.97465300 |
| H | 1.10291600  | 3.05135600  | -2.33301300 |
| C | 1.87218600  | 2.96017500  | 0.63448700  |
| H | 0.92069300  | 3.49540700  | 0.58213400  |
| H | 1.97841200  | 2.55593700  | 1.64296200  |
| C | 2.69421200  | 3.65403100  | 0.42741800  |
| H | -1.92178200 | -2.40155400 | -2.12730600 |
| H | -1.11143000 | -2.68540200 | -2.80560300 |
| H | -1.89630400 | -3.05622500 | -1.25358400 |
| H | -2.87683800 | -2.54259500 | -2.64494300 |
| C | -2.10321900 | 0.22481000  | -3.16869000 |
| H | -3.06516300 | -0.09698100 | -3.58492000 |
| H | -2.12452700 | 1.30143800  | -2.98353900 |
| H | -1.31110200 | 0.02199500  | -3.89501900 |
| C | 2.14784600  | -2.07475600 | -2.24835600 |
| H | 2.58125600  | -1.16777800 | -2.67779900 |
| H | 2.88100000  | -2.88757500 | -2.29193300 |
| H | 1.27857500  | -2.34045700 | -2.85575600 |
| H | -0.76563400 | 1.39979600  | -0.26795100 |
| C | -2.21234600 | 3.51735100  | -0.20047100 |
| O | -2.50086900 | 3.39739800  | -1.32309700 |
| O | -1.95028000 | 3.66869500  | 0.92525100  |
| C | -3.42426300 | -0.78782300 | 0.74074300  |
| C | 3.74763100  | -0.17008400 | 0.64861300  |
| F | -4.77093000 | -0.70535900 | 1.07135200  |
| F | -3.12991200 | -2.13881700 | 0.83018400  |
| F | 3.20540000  | 0.26996200  | 1.83906000  |
| F | 5.10456400  | -0.29191200 | 0.90978600  |

**C7**

**E=-1276.85273282 a.u.**

|    |             |             |             |
|----|-------------|-------------|-------------|
| Rh | 0.14726900  | 0.15353600  | 0.08363000  |
| P  | -1.61389500 | 1.66013300  | 0.29522200  |
| P  | -1.27879100 | -1.26391000 | -1.15244200 |
| C  | -3.27273100 | 0.89415100  | 0.61749300  |
| H  | -3.15635100 | 0.35790000  | 1.56368600  |
| H  | -4.01234600 | 1.69183100  | 0.74169100  |
| C  | -3.06062500 | -1.36483700 | -0.62775800 |
| H  | -3.62405600 | -1.95130400 | -1.36106500 |
| H  | -3.04812400 | -1.91281600 | 0.31916500  |
| P  | 1.76758500  | 1.74997400  | 0.14237700  |
| P  | 1.80991800  | -1.39241900 | 0.64713500  |
| C  | 3.25048400  | 1.36529600  | -0.93463800 |
| H  | 4.10535800  | 1.93947000  | -0.56241000 |
| H  | 3.02602500  | 1.71779100  | -1.94514300 |
| C  | 3.57685300  | -0.93184900 | 0.20130300  |
| H  | 4.15741600  | -1.84534900 | 0.04573200  |
| H  | 4.03972100  | -0.38875100 | 1.03068100  |
| C  | 1.45828700  | 3.44731100  | -0.52432500 |
| H  | 1.02231000  | 3.37257200  | -1.52326200 |
| O  | 0.76597200  | 3.98975100  | 0.12395300  |
| H  | 2.39344000  | 4.01343300  | -0.58088200 |
| C  | -1.02213000 | -3.06789000 | -1.40907200 |
| H  | -1.07846600 | -3.56483900 | -0.43879200 |
| H  | -1.79412300 | -3.46240400 | -2.07741300 |
| H  | -0.04497100 | -3.24193800 | -1.86246100 |
| C  | -1.38038100 | -0.69360200 | -2.90659400 |
| H  | -0.39565700 | -0.83348100 | -3.36123600 |
| H  | -2.12799000 | -1.25683700 | -3.47407300 |
| H  | -1.62578900 | 0.36824300  | -2.94646500 |
| C  | 1.93927500  | -1.50509300 | 2.47949200  |
| H  | 2.89688500  | -1.94473100 | 2.77631200  |
| H  | 1.81003300  | -0.52264000 | 2.93599600  |
| C  | 1.12065900  | -2.14282600 | 2.81589700  |
| H  | 1.82952200  | -3.17692800 | 0.20765900  |
| C  | 0.89041100  | -3.61263800 | 0.55162700  |
| H  | 1.94216600  | -3.30859200 | -0.87000200 |
| H  | 2.66456000  | -3.66798200 | 0.71719700  |
| C  | -2.03618500 | 2.95949600  | -0.94709000 |
| H  | -1.21739600 | 3.67449600  | -1.03819700 |
| H  | -2.20871400 | 2.49884600  | -1.92114000 |
| H  | -2.94238400 | 3.49533800  | -0.64896800 |
| C  | -1.46413700 | 2.61995000  | 1.85858000  |
| H  | -2.36920800 | 3.20386600  | 2.05362700  |
| H  | -1.30506700 | 1.89239900  | 2.65928500  |
| C  | -0.60926900 | 3.29920900  | 1.80842200  |
| H  | 2.58876000  | 2.21184100  | 1.74014200  |
| C  | 3.03993800  | 1.33234300  | 2.20473500  |
| H  | 3.35812000  | 2.97925800  | 1.60402400  |
| H  | 1.82341100  | 2.58455900  | 2.42691600  |
| H  | -2.00656600 | -2.08840500 | 3.46663600  |
| C  | -1.43446800 | -1.73918800 | 2.57500000  |
| O  | -1.25045400 | -0.49604100 | 2.49313100  |
| O  | -1.05007200 | -2.62396500 | 1.77395200  |
| C  | -3.80077600 | -0.06525300 | -0.42280600 |
| C  | 3.68612800  | -0.08623300 | -1.04733200 |
| C  | -5.10323800 | -0.37318700 | -0.08027000 |
| F  | -3.91041800 | 0.59450100  | -1.64061800 |
| F  | 2.99316400  | -0.70088000 | -2.06716100 |
| F  | 5.00578400  | -0.08982800 | -1.46515100 |

**C8**

**E=-1276.84000439 a.u.**

|    |             |             |             |
|----|-------------|-------------|-------------|
| Rh | 0.15052600  | -0.10842200 | -0.33555600 |
| P  | 1.57743600  | 1.72691500  | -0.16642500 |
| P  | 1.73240600  | -1.85875200 | -0.09301600 |
| C  | 3.33244300  | 1.28532000  | -0.66413200 |
| H  | 3.33910900  | 1.18952300  | -1.75426400 |
| H  | 4.00149800  | 2.11085500  | -0.39745200 |
| C  | 3.44676100  | -1.31663800 | -0.61798700 |
| H  | 4.18340200  | -2.07344300 | -0.32681700 |
| H  | 3.44269500  | -1.25723900 | -1.71068100 |
| P  | -1.01305900 | -0.16161200 | 1.68944800  |
| P  | -1.70334500 | -0.63683500 | -1.57203600 |
| C  | -2.85628200 | 0.15760800  | 1.60295200  |
| C  | -3.41167500 | -0.27345300 | -0.90199300 |
| H  | -4.16315600 | -0.81729700 | -1.48477600 |
| H  | -3.59206900 | 0.79570200  | -1.04382800 |
| C  | -0.99771600 | -1.73132700 | 2.66842800  |
| H  | -1.22291000 | -2.57536200 | 2.01420600  |
| H  | 0.00251100  | -1.86629900 | 3.08707400  |
| H  | -1.72425500 | -1.70711900 | 3.48667600  |
| C  | 1.60183400  | -3.31379900 | -1.23445500 |
| H  | 1.47053600  | -2.94951800 | -2.25689900 |
| H  | 2.48330900  | -3.96362600 | -1.18886100 |
| H  | 0.71527600  | -3.89538400 | -0.96632500 |
| C  | 2.15613600  | -2.75814700 | 1.47353900  |
| H  | 1.29088200  | -3.34385100 | 1.79528400  |
| H  | 3.00664600  | -3.43475400 | 1.33501000  |
| H  | 2.40209500  | -2.03550000 | 2.25497900  |
| C  | -1.90674900 | 0.13775300  | -3.23776900 |
| H  | -2.82587900 | -0.18923500 | -3.73637800 |
| H  | -1.90888700 | 1.22437000  | -3.13376200 |
| H  | -1.04410000 | -0.14520000 | -3.84679500 |
| C  | -1.91034500 | -2.41754000 | -2.04291000 |
| H  | -1.03405300 | -2.72059000 | -2.62243900 |
| H  | -1.95113800 | -3.02652400 | -1.13726900 |
| H  | -2.81408400 | -2.59129900 | -2.63735100 |
| C  | 1.93243900  | 2.66149500  | 1.39372700  |
| H  | 1.02082800  | 3.15655800  | 1.73658600  |
| H  | 2.26771700  | 1.96441500  | 2.16435200  |
| H  | 2.70951400  | 3.41756200  | 1.23715300  |
| C  | 1.41176400  | 3.15951100  | -1.33691900 |
| H  | 2.32012600  | 3.77258900  | -1.36691500 |
| H  | 1.19039000  | 2.77875700  | -2.33666900 |
| H  | 0.58325400  | 3.79636900  | -1.01756500 |
| C  | -0.63461900 | 1.03290300  | 3.04842000  |
| H  | -0.77366900 | 2.05384400  | 2.68821700  |
| H  | -1.27273500 | 0.86479000  | 3.92209900  |
| H  | 0.41106600  | 0.90953700  | 3.34108700  |
| H  | 0.79328900  | -0.05721100 | -1.80357900 |
| C  | -1.95815600 | 3.25894000  | -0.34582300 |
| O  | -1.55063100 | 3.49079300  | 0.72193900  |
| O  | -2.39821900 | 3.07239500  | -1.40787000 |
| C  | 3.93461600  | 0.01815100  | -0.08907900 |
| C  | -3.64754600 | -0.60013600 | 0.55577000  |
| F  | 5.30015600  | 0.07436500  | -0.33057800 |
| F  | 3.82672600  | 0.03802300  | 1.29187600  |
| H  | -3.30649800 | -0.06992900 | 2.57504100  |
| H  | -2.99406200 | 1.22762000  | 1.42252300  |
| F  | -4.99058000 | -0.37722500 | 0.81908700  |
| F  | -3.47502700 | -1.95952000 | 0.75246300  |

**C9**

**E=-1276.84062978 a.u.**

|    |             |             |             |
|----|-------------|-------------|-------------|
| Rh | -0.07081600 | -0.11162300 | -0.41989500 |
| P  | -1.88084500 | -1.60901700 | -0.32089900 |
| P  | -1.44286300 | 1.86319600  | 0.16311600  |
| C  | -3.55767400 | -0.87287300 | -0.67128900 |
| H  | -3.60552500 | -0.68547700 | -1.74814300 |
| H  | -4.32007700 | -1.62065700 | -0.42980800 |
| C  | -3.21910500 | 1.67595400  | -0.37704000 |
| H  | -3.80044400 | 2.52151100  | 0.00572500  |
| H  | -3.23160100 | 1.72813300  | -1.46997900 |
| P  | 1.14189400  | -0.42763900 | 1.65941400  |
| P  | 1.82118400  | 0.89931000  | -1.36624800 |
| C  | 2.91681100  | -0.92745900 | 1.39624200  |
| H  | 2.87775000  | -1.92700100 | 0.95501500  |
| C  | 3.41420400  | -0.99144400 | 2.36977500  |
| C  | 3.43133500  | 0.06902900  | -0.95555100 |
| H  | 1.32234700  | 1.00143800  | 2.82021600  |
| C  | 1.58909900  | 1.90938200  | 2.27575400  |
| H  | 0.36905300  | 1.16341500  | 3.32949200  |
| H  | 2.09351000  | 0.80560700  | 3.57094900  |
| C  | -1.13251200 | 3.46911100  | -0.70432000 |
| H  | -0.98732500 | 3.28711000  | -1.77255000 |
| H  | -1.96535100 | 4.16676400  | -0.56725500 |
| H  | -0.22619400 | 3.92868300  | -0.30402700 |
| C  | -1.68291600 | 2.49916300  | 1.88480900  |
| H  | -0.74335800 | 2.92881600  | 2.24111300  |
| H  | -2.45885200 | 3.27062400  | 1.92140900  |
| H  | -1.96896000 | 1.67981100  | 2.54718300  |

|   |             |             |             |
|---|-------------|-------------|-------------|
| C | 1.87356300  | 0.84544200  | -3.19796400 |
| H | 2.82863800  | 1.21494400  | -3.58437400 |
| H | 1.70685500  | -0.19255600 | -3.49242000 |
| H | 1.05821900  | 1.46305700  | -3.58343200 |
| C | 2.21153400  | 2.67412100  | -1.03691100 |
| H | 1.52965100  | 3.29997700  | -1.61633500 |
| H | 2.09547700  | 2.90298200  | 0.02385100  |
| C | 3.23799300  | 2.90542600  | -1.33488200 |
| C | -2.20287900 | -2.59166200 | 1.19800600  |
| H | -1.31744900 | -3.20242000 | 1.38307500  |
| H | -2.37881700 | -1.92947600 | 2.04741500  |
| H | -3.07216700 | -3.24222900 | 1.06181600  |
| C | -1.92140100 | -2.92106700 | -1.61126900 |
| H | -2.89078900 | -3.42990500 | -1.60799600 |
| H | -1.73205200 | -2.47346400 | -2.58869000 |
| H | -1.12549600 | -3.63880400 | -1.40578700 |
| C | 0.68284600  | -1.75197800 | 2.85270100  |
| C | 0.70578400  | -2.70572400 | 2.32354000  |
| H | 1.38612200  | -1.77262200 | 3.69118600  |
| H | -0.32324500 | -1.57086200 | 3.23770700  |
| H | -0.68318800 | 0.02418200  | -1.87846900 |
| C | 0.89275600  | -1.97029700 | -1.05079100 |
| O | 0.93538900  | -2.79940000 | -0.12251700 |
| C | 1.27854000  | -2.02959300 | -2.21806000 |
| C | -3.93220600 | 0.40690400  | 0.04053400  |
| C | 3.77658100  | -0.04739500 | 0.51474600  |
| F | -5.28497000 | 0.61121500  | -0.15856200 |
| F | -3.79861900 | 0.23330900  | 1.40800500  |
| H | 3.37665400  | -0.93431300 | -1.38703300 |
| H | 4.24813500  | 0.61277300  | -1.44190200 |
| F | 3.84154400  | 1.22684000  | 1.06643400  |
| F | 5.06915600  | -0.52465100 | 0.59573600  |

**C10**

**E=-1277.27908392 a.u.**

|    |             |             |             |
|----|-------------|-------------|-------------|
| Rh | -0.03747500 | 0.17572100  | -0.54583500 |
| P  | -1.85595600 | 1.62323500  | -0.30288100 |
| P  | -1.50169100 | -1.73098600 | -0.39220300 |
| C  | -3.14384500 | 1.07987100  | 0.91798300  |
| H  | -2.67904800 | 1.08624900  | 1.90942200  |
| C  | -3.95825000 | 1.81160400  | 0.93034900  |
| H  | -2.90948600 | -1.52841600 | 0.80822700  |
| H  | -3.58154200 | -2.38749800 | 0.71167300  |
| H  | -2.48509200 | -1.56100200 | 1.81562600  |
| P  | 1.85848200  | -0.83256000 | -1.47400300 |
| P  | 0.80022200  | 0.21687400  | 1.72682800  |
| C  | 3.41504800  | -0.79995000 | -0.46648900 |
| C  | 3.86605000  | 0.19037400  | -0.57080500 |
| H  | 4.11394300  | -1.53191300 | -0.88380800 |
| C  | 2.63826100  | -0.01586500 | 1.87342100  |
| C  | 2.87715800  | -0.24325000 | 2.91708300  |
| C  | 3.11841300  | 0.93386300  | 1.62064900  |
| H  | 1.77845300  | -2.59157500 | -1.99941500 |
| H  | 1.74214100  | -3.23714700 | -1.12059100 |
| H  | 0.88746800  | -2.75436200 | -2.61066400 |
| H  | 2.66203900  | -2.85082300 | -2.58965600 |
| C  | -0.87302900 | -3.37050200 | 0.17164800  |
| C  | -0.16572800 | -3.25975800 | 0.99436300  |
| H  | -1.69748600 | -4.01758800 | 0.48386300  |
| H  | -0.35670500 | -3.85666100 | -0.65812400 |
| C  | -2.35083700 | -2.18823200 | -1.95580500 |
| H  | -1.59576900 | -2.46183500 | -2.69679500 |
| H  | -3.03315900 | -3.02960800 | -1.80705300 |
| C  | -2.91449700 | -1.33817500 | -2.34078900 |
| H  | 0.64945200  | 1.80370200  | 2.65239300  |
| H  | 1.22677600  | 1.77139100  | 3.58089600  |
| H  | 1.00270200  | 2.63442400  | 2.03763600  |
| H  | -0.39825800 | 1.98157100  | 2.90945700  |
| C  | 0.16581600  | -0.95967400 | 2.99577900  |
| H  | -0.90439700 | -0.79402100 | 3.14549200  |
| H  | 0.32646600  | -1.99017300 | 2.67682500  |
| H  | 0.67225800  | -0.80958200 | 3.95355500  |
| C  | -2.78259700 | 1.93385300  | -1.85409500 |
| H  | -2.11959600 | 2.47640100  | -2.53252500 |
| C  | -3.06781100 | 0.99525100  | -2.32747500 |
| H  | -3.67967900 | 2.52905200  | -1.66379700 |
| C  | -1.53883500 | 3.33708300  | 0.26911500  |
| C  | -2.46615200 | 3.91670200  | 0.25531200  |
| H  | -1.12550500 | 3.35030100  | 1.27732800  |
| C  | -0.81436600 | 3.79883100  | -0.40527300 |
| C  | 2.42392200  | 0.00608200  | -3.00309500 |
| H  | 2.58575800  | 1.06566400  | -2.79808700 |
| H  | 3.34775300  | -0.44212200 | -3.37945600 |
| H  | 1.64261500  | -0.07938100 | -3.76162400 |
| H  | 0.79898300  | 1.49476100  | -0.80308500 |
| H  | -0.41797500 | 0.28143900  | -2.06964400 |
| C  | 2.56588200  | 3.47892900  | -0.53535100 |
| O  | 3.39283500  | 2.67663000  | -0.34856800 |
| C  | 1.74079000  | 4.27945400  | -0.71159500 |
| C  | 3.25539100  | -1.10042500 | 1.01103000  |
| C  | -3.77506700 | -0.28514000 | 0.69819200  |
| F  | -4.40169500 | -0.28962600 | -0.52998100 |
| F  | -4.77938200 | -0.41559100 | 1.62515700  |

**C11**

**E=-1277.26302527 a.u.**

|    |             |             |             |
|----|-------------|-------------|-------------|
| Rh | -0.02784300 | 0.23010600  | -0.42785900 |
| P  | -1.96556000 | 1.51282400  | 0.02147800  |
| P  | -1.29676400 | -1.68956600 | -0.59894300 |
| C  | -3.27615300 | 0.71069000  | 1.05265100  |
| H  | -2.88169500 | 0.60670600  | 2.06823800  |
| H  | -4.15213500 | 1.36573300  | 1.10010900  |
| C  | -2.73314300 | -1.78623600 | 0.57305100  |
| H  | -3.28535100 | -2.70546100 | 0.35205700  |
| H  | -2.32011000 | -1.88813700 | 1.58139200  |
| P  | 1.96936600  | -0.52300700 | -1.47695600 |
| P  | 0.86396800  | -0.02394000 | 1.86596900  |
| C  | 3.48961900  | -0.05385600 | -0.53716400 |
| C  | 3.57757200  | 1.03487700  | -0.58379700 |
| H  | 4.35316500  | -0.49378600 | -1.04608100 |
| C  | 2.68880200  | 0.29208400  | 1.90437900  |
| H  | 3.05871800  | 0.06767100  | 2.91000900  |
| C  | 2.82622600  | 1.35979000  | 1.71317600  |
| C  | 2.27760500  | -2.26635700 | -1.96313300 |
| H  | 2.32002700  | -2.91059200 | -1.08471500 |
| H  | 1.49009800  | -2.60708900 | -2.64065200 |
| H  | 3.23414200  | -2.33267200 | -2.48905700 |
| C  | -0.51777100 | -3.30496000 | -0.20576600 |
| C  | -0.00923600 | -3.26534900 | 0.75790700  |
| H  | -1.28459400 | -4.08384900 | -0.17473000 |
| H  | 0.20696500  | -3.56931700 | -0.97476600 |
| C  | -2.01989400 | -1.98870400 | -2.25415500 |
| H  | -1.20404600 | -2.11132500 | -2.97109900 |
| H  | -2.64133100 | -2.88811200 | -2.25419300 |
| C  | -2.62360800 | -1.13542800 | -2.56352700 |
| C  | 0.33423900  | 1.27070500  | 3.05650900  |
| H  | 0.89803000  | 1.19044400  | 3.99024800  |
| H  | 0.51509500  | 2.25144100  | 2.61154000  |
| C  | -0.72911200 | 1.16119600  | 3.28620300  |
| H  | 0.67958900  | -1.55680900 | 2.86951200  |
| H  | -0.37939800 | -1.79371600 | 3.00548400  |
| H  | 1.17792000  | -2.39502900 | 2.38053800  |
| H  | 1.13011100  | -1.42061100 | 3.85679000  |
| C  | -2.83082700 | 2.04969400  | -1.50279000 |
| C  | -2.16004300 | 2.70802500  | -2.06067300 |
| H  | -3.07590200 | 1.19175100  | -2.12854700 |
| H  | -3.74844200 | 2.59144800  | -1.25881900 |
| C  | -1.73069900 | 3.09747300  | 0.91445600  |
| C  | -2.63748600 | 3.70062200  | 0.81787400  |
| H  | -1.53442100 | 2.92195200  | 1.97176800  |
| H  | -0.88678800 | 3.64610800  | 0.49346400  |
| C  | 2.24167400  | 0.36331600  | -3.05754600 |
| H  | 2.18410000  | 1.44131500  | -2.90118200 |
| H  | 3.22431300  | 0.11551600  | -3.46873900 |
| H  | 1.46779200  | 0.07157100  | -3.77105900 |
| H  | 0.37810600  | 2.88083200  | -1.90589300 |
| H  | -0.44666900 | 0.50687500  | -1.91074600 |
| C  | 1.11282200  | 2.98089000  | -1.07666200 |
| O  | 1.81990600  | 3.96073700  | -0.98244400 |
| O  | 1.13521900  | 1.97114300  | -0.24494700 |
| C  | -3.74460800 | -0.65366100 | 0.58443200  |
| C  | 3.53910200  | -0.48329100 | 0.91747400  |
| F  | -4.29168400 | -0.53375800 | -0.67464600 |
| F  | -4.77180100 | -1.04004900 | 1.40257800  |
| F  | 3.21844700  | -1.83358400 | 1.00236900  |
| F  | 4.83865900  | -0.39191200 | 1.32964900  |

**C12**

**E=-1087.79980410 a.u.**

|    |             |             |             |
|----|-------------|-------------|-------------|
| Rh | 0.10905300  | 0.05530500  | 0.49356900  |
| P  | 2.03056100  | 1.44979800  | 0.33506200  |
| P  | 0.95609200  | -1.22024000 | -1.13554700 |
| C  | 3.56178000  | 0.67559200  | -0.36134700 |
| H  | 3.62320500  | 0.89330300  | -1.43250800 |
| H  | 4.42991100  | 1.14438900  | 0.11340500  |
| C  | 2.73387400  | -1.70564000 | -0.98428200 |
| C  | 2.76941200  | -2.70908900 | -0.54969200 |
| H  | 3.14179500  | -1.77135200 | -1.99813600 |
| P  | -1.66952600 | -1.29486500 | 1.31141700  |
| P  | -1.59154900 | 1.75734700  | -0.21143800 |
| C  | -3.20271400 | -1.44103700 | 0.28121900  |
| H  | -4.07323300 | -1.44381900 | 0.94539400  |
| C  | -3.18858900 | -2.40712500 | -0.23242300 |
| C  | -3.32446100 | 1.08525700  | -0.31586500 |
| H  | -3.88637100 | 1.69703900  | -1.02833800 |
| C  | -3.82281400 | 1.18705100  | 0.65287300  |
| H  | -1.36472100 | -3.01199400 | 1.86355600  |
| H  | -1.19591100 | -3.67582300 | 1.01487600  |
| H  | -0.48878100 | -3.03368600 | 2.51598400  |
| C  | -2.23182300 | -3.37960300 | 2.41955600  |
| C  | 0.80178300  | -0.32087400 | -2.71897400 |
| H  | 1.29064300  | 0.65409100  | -2.67371900 |



|   |             |             |             |
|---|-------------|-------------|-------------|
| H | 1.25484900  | -0.91233700 | -3.52057600 |
| H | -0.25744800 | -0.18096000 | -2.94136100 |
| C | 0.12351400  | -2.81233500 | -1.43167300 |
| H | -0.94079900 | -2.64826500 | -1.61214700 |
| H | 0.56222500  | -3.27510200 | -2.32143400 |
| C | 0.27305700  | -3.48090200 | -0.58283300 |
| H | -1.79984900 | 3.18001000  | 0.93452700  |
| H | -2.63164300 | 3.81510400  | 0.61726800  |
| H | -1.98859100 | 2.83582700  | 1.95443400  |
| H | -0.89036300 | 3.78581900  | 0.94416800  |
| C | -1.38535900 | 2.54613700  | -1.85631200 |
| H | -0.40834700 | 3.02361800  | -1.93616500 |
| H | -1.48302400 | 1.79543000  | -2.64205300 |
| H | -2.15791600 | 3.30664700  | -2.00122300 |
| C | 2.43686600  | 1.85924600  | 2.07361000  |
| H | 1.58802100  | 2.36057200  | 2.54653300  |
| H | 2.66626400  | 0.94366700  | 2.62158800  |
| H | 3.30151800  | 2.52822300  | 2.11072800  |
| C | 2.01675200  | 3.06089600  | -0.53666700 |
| H | 2.97940200  | 3.56129300  | -0.39646600 |
| H | 1.85324000  | 2.92157600  | -1.60781600 |
| C | 1.23384700  | 3.70816300  | -0.13587800 |
| H | -2.20408000 | -0.45457800 | 2.85695700  |
| H | -2.52801200 | 0.57016700  | 2.66304600  |
| C | -3.03170900 | -1.00160000 | 3.31786900  |
| H | -1.37225700 | -0.42891700 | 3.56620500  |
| H | 1.03269700  | -1.01414200 | 1.15621600  |
| C | -3.40575300 | -0.36481600 | -0.77421700 |
| C | 3.66423600  | -0.82572000 | -0.15281600 |
| F | -4.61193700 | -0.57594700 | -1.35335500 |
| F | 3.46059400  | -1.10071000 | 1.17878100  |
| F | 4.93424000  | -1.21256000 | -0.43406900 |
| F | -2.46342100 | -0.56183300 | -1.78209900 |

**C13**

**E=-1858.24840360 a.u.**

|    |             |             |             |
|----|-------------|-------------|-------------|
| Rh | -1.34871400 | -0.05399600 | 0.27921400  |
| P  | -0.63660000 | 1.88231700  | 1.41773600  |
| P  | -1.50207500 | 1.12154500  | -1.70104200 |
| C  | -1.41875500 | 3.47815300  | 0.89626500  |
| H  | -2.46350000 | 3.45722000  | 1.22297300  |
| H  | -0.92563000 | 4.30591700  | 1.41640000  |
| C  | -2.13122200 | 2.85676300  | -1.52635500 |
| H  | -2.12246700 | 3.32264600  | -2.51704200 |
| C  | -3.17421100 | 2.79262700  | -1.20163600 |
| P  | -1.49631700 | -2.19980300 | -0.71076300 |
| P  | -3.71766300 | -0.10314800 | 0.99553100  |
| C  | -3.13763200 | -2.83212600 | -1.33434400 |
| H  | -3.15762100 | -3.90668100 | -1.13049100 |
| H  | -3.17775500 | -2.71561900 | -2.42091800 |
| C  | -4.47965100 | -1.76621900 | 0.65982800  |
| H  | -5.53249700 | -1.73705400 | 0.95796000  |
| H  | -3.97298500 | -2.49050000 | 1.30634100  |
| C  | -0.41582200 | -2.53318700 | -2.15834100 |
| C  | -0.71437600 | -1.92764900 | -3.01708600 |
| H  | 0.61522100  | -2.27907500 | -1.89868600 |
| H  | -0.46749900 | -3.58849300 | -2.44048700 |
| C  | -2.67130200 | 0.53339000  | -2.98725000 |
| H  | -3.69105400 | 0.51978400  | -2.60376500 |
| H  | -2.61681300 | 1.18472400  | -3.86405700 |
| H  | -2.41606700 | -0.48258100 | -3.29373700 |
| C  | 0.06815400  | 1.26609500  | -2.62664000 |
| H  | 0.28921000  | 0.29378100  | -3.07419500 |
| H  | -0.00617400 | 2.02014400  | -3.41422400 |
| C  | 0.89049800  | 1.49883400  | -1.94968300 |
| C  | -3.95547200 | -0.03405900 | 2.81556600  |
| H  | -4.92023000 | -0.46475400 | 3.09759300  |
| H  | -3.14104500 | -0.58119100 | 3.29586600  |
| H  | -3.94007200 | 1.00704300  | 3.14697900  |
| C  | -4.98007700 | 1.09462800  | 0.39326300  |
| H  | -4.70144100 | 2.09604900  | 0.73548800  |
| H  | -5.03611300 | 1.09230700  | -0.69605500 |
| H  | -5.97073600 | 0.85893000  | 0.79206300  |
| C  | 1.16106200  | 2.18035300  | 1.30087200  |
| H  | 1.68655400  | 1.29199800  | 1.66229800  |
| H  | 1.44075100  | 2.32447700  | 0.25828900  |
| H  | 1.45073000  | 3.05922100  | 1.88339100  |
| C  | -0.94813200 | 1.92420800  | 3.22273700  |
| H  | -0.51455500 | 2.83503300  | 3.64494700  |
| H  | -2.01776600 | 1.90408600  | 3.43101500  |
| C  | -0.49204400 | 1.05561000  | 3.69978000  |
| H  | -1.01054000 | -3.50974300 | 0.47406100  |
| C  | -1.61874600 | -3.44649300 | 1.37798200  |
| H  | -1.11696900 | -4.49188900 | 0.00533700  |
| H  | 0.02747200  | -3.36483100 | 0.77647500  |
| H  | 0.87537900  | -0.77492100 | 2.15920100  |
| H  | 0.16689400  | -0.20011000 | -0.07403100 |
| C  | 0.02672300  | -1.29532100 | 2.64843100  |
| O  | 0.20540000  | -2.00448400 | 3.62046300  |
| P  | -1.13765400 | -1.08421000 | 2.09516900  |
| P  | 3.31124500  | -0.00704600 | -0.67469400 |
| N  | 4.08175500  | -1.17542600 | -1.72319000 |

|   |             |             |             |
|---|-------------|-------------|-------------|
| N | 3.09154800  | -0.81802000 | 0.86798000  |
| N | 4.34744100  | 1.33964300  | -0.35913800 |
| C | 2.60725800  | -2.18166800 | 0.71578800  |
| H | 1.78510600  | -2.19224100 | -0.00877300 |
| C | 3.88577900  | 2.61137500  | -0.90683500 |
| H | 4.62711900  | 3.03585200  | -1.59636300 |
| C | 3.54264200  | -1.13877500 | -3.07976000 |
| C | 2.51243900  | -0.77231600 | -3.06354300 |
| H | 5.57654300  | 1.51022900  | 0.41991200  |
| H | 5.33765100  | 1.78135400  | 1.45883800  |
| H | 6.11310300  | 2.37306600  | 0.00632600  |
| C | 6.54581800  | 0.32355300  | 0.39938000  |
| H | 7.05677000  | 0.30401500  | -0.56719700 |
| H | 7.31993500  | 0.51531000  | 1.16276400  |
| C | 3.93917100  | -0.61583700 | 2.03250100  |
| H | 4.01921000  | 0.45817500  | 2.21621600  |
| C | 3.42960600  | -1.04410000 | 2.90542000  |
| H | 5.34180200  | -1.23975100 | 1.88579400  |
| H | 5.99012900  | -0.87640300 | 2.69884600  |
| H | 5.27102300  | -2.32575500 | 2.00629400  |
| C | 5.48914300  | -1.56163100 | -1.75289700 |
| H | 6.09328400  | -0.75067700 | -2.19564100 |
| H | 5.59271200  | -2.41877000 | -2.43125500 |
| C | 6.07125600  | -1.96687600 | -0.40452800 |
| H | 5.56950800  | -2.87348500 | -0.05532000 |
| H | 7.13140000  | -2.23018100 | -0.56567500 |
| N | 5.90986100  | -0.94723500 | 0.59921500  |
| H | 3.36519600  | -2.88677000 | 0.34826000  |
| H | 2.22804200  | -2.54633300 | 1.67660600  |
| H | 3.54453500  | -2.14547800 | -3.51603200 |
| H | 4.12464400  | -0.48245400 | -3.74692300 |
| H | 2.95772700  | 2.47174100  | -1.46652600 |
| H | 3.70037200  | 3.35133700  | -0.11409700 |
| C | -1.39300900 | 3.79282600  | -0.58734700 |
| C | -4.43235800 | -2.24660000 | -0.77973400 |
| F | -4.82628400 | -1.20133300 | -1.59955700 |
| F | -5.40146900 | -3.20232500 | -0.93822100 |
| F | -0.08367200 | 3.89912100  | -1.00369400 |
| F | -1.93691300 | 5.04070600  | -0.75119300 |

**C14**

**E=-1858.28168693 a.u.**

|    |             |             |             |
|----|-------------|-------------|-------------|
| Rh | 2.32876800  | 0.60754200  | -0.00811400 |
| P  | 1.14337500  | 1.67329900  | -1.70101000 |
| P  | 1.86392800  | 2.39948900  | 1.36292800  |
| C  | -0.02063700 | 3.05998200  | -1.21455100 |
| H  | 0.52585500  | 4.00817000  | -1.20916400 |
| H  | -0.79852900 | 3.13864000  | -1.98045800 |
| C  | 0.14871200  | 3.14695200  | 1.36225000  |
| H  | -0.39938900 | 2.74669300  | 2.22024400  |
| H  | 0.23556300  | 4.22961400  | 1.49916200  |
| P  | 2.72707400  | -0.91861800 | 1.71297000  |
| P  | 3.55787900  | -0.70653200 | -1.53837700 |
| C  | 3.25931900  | -2.63186000 | 1.25704400  |
| H  | 2.41282500  | -3.10190000 | 0.74784300  |
| H  | 3.49132600  | -3.18359000 | 2.17284100  |
| C  | 4.17015700  | -2.40867300 | -1.11613000 |
| H  | 5.08161600  | -2.60026200 | -1.69116300 |
| C  | 3.38592400  | -3.09821700 | -1.43945300 |
| H  | 3.82848300  | -0.58111700 | 3.15335600  |
| H  | 4.83108600  | -0.33731300 | 2.79779200  |
| H  | 3.44610600  | 0.25117800  | 3.74318600  |
| H  | 3.88797900  | -1.46205500 | 3.79908200  |
| H  | 2.90002000  | 3.82791000  | 0.81254000  |
| C  | 2.73168100  | 4.03950500  | -0.24544900 |
| H  | 2.69283600  | 4.72803500  | 1.39995900  |
| H  | 3.95213200  | 3.55711000  | 0.93048300  |
| C  | 2.16723400  | 2.49337900  | 3.18111700  |
| H  | 3.23439600  | 2.36746500  | 3.37567600  |
| H  | 1.85724800  | 3.46820100  | 3.56983300  |
| H  | 1.61559400  | 1.71166100  | 3.70905200  |
| C  | 3.00408100  | -1.11845100 | -3.24731500 |
| H  | 3.80721000  | -1.64128700 | -3.77551500 |
| H  | -2.13678000 | -1.77789900 | -3.16359900 |
| H  | 2.74362500  | -0.22682700 | -3.81954700 |
| C  | 5.12982200  | 0.20931200  | -1.84588700 |
| H  | 4.90277300  | 1.20023800  | -2.24773900 |
| H  | 5.66002500  | 0.33482300  | -0.89957400 |
| H  | 5.77403700  | -0.32565100 | -2.55031300 |
| C  | -0.02534800 | 0.49441700  | -2.48618700 |
| H  | 0.53120000  | -0.23889400 | -3.06935800 |
| H  | -0.54478100 | -0.05612100 | -1.69544100 |
| H  | -0.73061200 | 1.01459900  | -3.14213600 |
| C  | 1.95072400  | 2.52851800  | -3.12360900 |
| H  | 1.21212900  | 2.89323300  | -3.84399800 |
| H  | 2.53853400  | 3.37382700  | -2.75513900 |
| C  | 2.63370100  | 1.84836400  | -3.63478600 |
| H  | 1.10266000  | -1.30438100 | 2.48051900  |
| H  | 0.42812400  | -1.61988100 | 1.67659100  |
| H  | 1.19507200  | -2.09347100 | 3.23364600  |
| H  | 0.69148600  | -0.40557900 | 2.94803200  |
| H  | -0.56020500 | -3.59813600 | -1.39074500 |
| H  | -2.62954800 | -0.45389000 | -0.42671700 |

|   |             |             |             |
|---|-------------|-------------|-------------|
| C | -0.09787300 | -2.69630300 | -0.92197000 |
| O | -0.88003900 | -1.94084400 | -0.28533400 |
| O | 1.13330700  | -2.55428200 | -1.09082700 |
| C | -0.69381100 | 2.89013900  | 0.13082900  |
| C | 4.45556600  | -2.69612000 | 0.33538800  |
| P | -3.99143500 | -0.56442500 | -0.11055000 |
| N | -3.76379500 | -0.84186800 | 1.53818600  |
| N | -4.43181200 | -1.82073500 | -1.16348000 |
| N | -4.53753000 | 0.93015100  | -0.69293600 |
| C | -3.85727900 | -3.14100900 | -0.89176500 |
| H | -2.83569200 | -3.00879500 | -0.51905700 |
| C | -3.77539500 | 1.56748600  | -1.76277300 |
| C | -3.73385700 | 2.64762600  | -1.59077500 |
| H | -2.43203000 | -0.63462600 | 2.11152500  |
| H | -1.66602500 | -0.73099900 | 1.34140300  |
| C | -5.92715300 | 1.35067700  | -0.63679400 |
| H | -6.44080500 | 1.12929500  | -1.58573800 |
| H | -5.97217900 | 2.43609700  | -0.49522000 |
| C | -6.61592500 | 0.65260700  | 0.52501100  |
| H | -6.29238900 | 1.10833000  | 1.46385400  |
| H | -7.70646800 | 0.74420800  | 0.45917000  |
| C | -5.79085100 | -1.75927600 | -1.66694200 |
| H | -5.87615200 | -0.92284600 | -2.36879800 |
| C | -6.00544000 | -2.67065100 | -2.22983100 |
| H | -6.79940200 | -1.59185400 | -0.51125700 |
| C | -7.73850500 | -1.15589400 | -0.86705200 |
| H | -7.03250600 | -2.56491000 | -0.07438700 |
| C | -4.83503400 | -0.84255200 | 2.51664000  |
| H | -4.97022400 | 0.16214800  | 2.94697300  |
| H | -4.56607300 | -1.50751700 | 3.34400300  |
| C | -6.10308900 | -1.35229000 | 1.85570400  |
| H | -6.02274900 | -2.43374300 | 1.72731300  |
| H | -6.99402800 | -1.13857500 | 2.45874100  |
| N | -6.18310100 | -0.74722500 | 0.52308300  |
| H | -4.44354200 | -3.71209800 | -0.15725600 |
| H | -3.81247100 | -3.70676300 | -1.82629500 |
| H | -2.24573300 | -1.41134600 | 2.86029900  |
| H | -2.35939000 | 0.34993200  | 2.59209900  |
| H | -2.75357800 | 1.18807700  | -1.77627500 |
| H | -4.23264100 | 1.37746100  | -2.74360500 |
| F | 5.00297600  | -3.95389500 | 0.41994300  |
| F | 5.45036000  | -1.84103100 | 0.79344500  |
| F | -1.22953300 | 1.62227900  | 0.21292100  |
| F | -1.78495600 | 3.73759600  | 0.18123000  |

C7'

E= -1278.03402868 a.u.

|   |             |             |             |
|---|-------------|-------------|-------------|
| P | -1.50404000 | 1.59996500  | 0.61000600  |
| P | -1.59315600 | -1.35187900 | -1.02497400 |
| C | -3.25916700 | 1.02562400  | 0.74846800  |
| H | -3.27195600 | 0.27857700  | 1.54912900  |
| C | -3.89374200 | 1.87449100  | 1.02066800  |
| H | -3.40469000 | -1.05034200 | -0.74226800 |
| H | -3.96272200 | -1.42847300 | -1.60485000 |
| C | -3.66722800 | -1.62745300 | 0.14798300  |
| P | 1.68608600  | -1.59840200 | -0.05077500 |
| P | 1.71072800  | 1.67163000  | -0.41164000 |
| C | 3.24766200  | -0.95292300 | 0.72651600  |
| H | 3.90963800  | -1.77744900 | 1.00758900  |
| H | 2.91310800  | -0.46384500 | 1.64653800  |
| C | 3.33973900  | 0.99653900  | -1.00394700 |
| H | 4.03145900  | 1.80705200  | -1.25345600 |
| H | 3.10767100  | 0.46012100  | -1.92903600 |
| C | 1.29973700  | -2.90102400 | 1.17883600  |
| H | 0.98557100  | -2.40507000 | 2.10358100  |
| H | 0.46465800  | -3.50973300 | 0.83227600  |
| H | 2.17099100  | -3.54130800 | 1.34701500  |
| C | -1.61375000 | -3.17978000 | -0.80603800 |
| H | -1.75794300 | -3.38337000 | 0.25788100  |
| H | -2.43750600 | -3.61834600 | -1.37803000 |
| H | -0.67669100 | -3.61937600 | -1.15643400 |
| C | -1.47978300 | -1.20518000 | -2.86582500 |
| H | -0.47298400 | -1.48364800 | -3.18880500 |
| H | -2.21039000 | -1.84805800 | -3.36794100 |
| H | -1.65829300 | -0.16631200 | -3.15145900 |
| C | 1.38872100  | 2.79236900  | -1.84264800 |
| H | 0.45036600  | 3.32736000  | -1.69668500 |
| H | 2.20073700  | 3.51491700  | -1.97227900 |
| H | 1.28997800  | 2.18844200  | -2.74811400 |
| C | 2.23529100  | 2.85668700  | 0.90082900  |
| H | 1.40580900  | 3.52990300  | 1.13468200  |
| H | 2.49261900  | 2.30690900  | 1.80905600  |
| H | 3.09695200  | 3.45050800  | 0.58225300  |
| C | -1.72174500 | 3.30120300  | -0.07687000 |
| H | -0.79793800 | 3.87155200  | 0.05356300  |
| H | -1.96751100 | 3.25251400  | -1.13965400 |
| H | -2.52428000 | 3.82587700  | 0.45028100  |
| C | -1.13652000 | 1.93597300  | 2.37539900  |
| H | -1.94007900 | 2.51628300  | 2.84010800  |
| H | -1.00592700 | 0.97106900  | 2.87745100  |
| H | -0.19719000 | 2.48809100  | 2.45417700  |
| C | 2.30685200  | -2.55427000 | -1.50301400 |
| H | 2.69703100  | -1.87957000 | -2.26839800 |

C8'

E= -1278.03218831 a.u.

|    |             |             |             |
|----|-------------|-------------|-------------|
| P  | 1.70498700  | -0.92052900 | 1.49118400  |
| P  | 1.04901100  | 0.00598000  | -1.68067400 |
| C  | 3.42459300  | -0.58040100 | 0.85663300  |
| H  | 3.65153500  | 0.45911000  | 1.11310200  |
| H  | 4.14337500  | -1.22569900 | 1.37264600  |
| C  | 2.90610100  | 0.18544900  | -1.56960000 |
| H  | 3.34043300  | 0.04978900  | -2.56580200 |
| H  | 3.11942200  | 1.21066000  | -1.25129600 |
| P  | -1.65957600 | 1.67578900  | 0.20069900  |
| P  | -1.73489600 | -1.78866600 | 0.06162000  |
| C  | -3.33811100 | 1.01548700  | 0.68866500  |
| H  | -4.05583300 | 1.83289700  | 0.81405600  |
| C  | -3.18362800 | 0.55285200  | 1.66723400  |
| H  | -3.20682200 | -1.11934200 | -0.87701500 |
| H  | -3.92095400 | -1.90726000 | -1.13978500 |
| H  | -2.79307700 | -0.71674700 | -1.80703500 |
| C  | -1.59093600 | 3.07273700  | 1.40923000  |
| H  | -1.47071200 | 2.65967100  | 2.41336800  |
| H  | -0.72059500 | 3.69939100  | 1.20185100  |
| C  | -2.49190900 | 3.69360300  | 1.36518700  |
| H  | 0.76149300  | 1.34622200  | -2.92362500 |
| H  | 0.93050200  | 2.32700100  | -2.47352500 |
| H  | 1.42342900  | 1.23473200  | -3.78820200 |
| H  | -0.27525900 | 1.30089900  | -3.26554900 |
| C  | 0.90787000  | -1.45580600 | -2.80620700 |
| H  | -0.11490500 | -1.49477900 | -3.19355700 |
| H  | 1.60266100  | -1.39213800 | -3.64953500 |
| H  | 1.10684400  | -2.37232100 | -2.24857300 |
| C  | -1.49772600 | -3.35026500 | -0.91160900 |
| H  | -0.65297600 | -3.90332700 | -0.49085300 |
| H  | -2.38895200 | -3.98692700 | -0.88590700 |
| H  | -1.26059800 | -3.11494600 | -1.95159500 |
| C  | -2.53742600 | -2.50269600 | 1.56819800  |
| H  | -1.80803100 | -3.13913500 | 2.07812700  |
| H  | -2.81789300 | -1.70295400 | 2.25653500  |
| C  | -3.42474100 | -3.09581800 | 1.32518500  |
| C  | 1.72389400  | -2.76135800 | 1.65916300  |
| H  | 0.81485400  | -3.06347400 | 2.18745000  |
| H  | 1.71868400  | -3.21395700 | 0.66564400  |
| H  | 2.59811300  | -3.11847300 | 2.21312200  |
| C  | 1.96144400  | -0.41541800 | 3.24518100  |
| H  | 2.83311300  | -0.90959800 | 3.68678600  |
| H  | 2.09033000  | 0.66831100  | 3.29291200  |
| H  | 1.06463100  | -0.68003000 | 3.81071500  |
| C  | -2.08154700 | 2.60405300  | -1.34314900 |
| H  | -2.31733700 | 1.90711500  | -2.15064000 |
| H  | -2.94560700 | 3.25636100  | -1.18487700 |
| H  | -1.22735900 | 3.21420700  | -1.64818200 |
| H  | 1.24544400  | 1.71897800  | 1.05825800  |
| C  | -0.62152600 | 0.12818300  | 1.87121300  |
| O  | 1.93174800  | 2.42397400  | 1.30848800  |
| C  | 1.95527700  | 3.37678600  | 0.39096000  |
| H  | 1.19558400  | 3.23861000  | -0.40263500 |
| O  | 2.71869600  | 4.31040300  | 0.39963400  |
| Rh | -0.08927600 | -0.02484700 | 0.36846500  |
| C  | -4.00929500 | -0.00960500 | -0.21173500 |
| C  | 3.63848300  | -0.75211900 | -0.63031900 |
| F  | -5.01241600 | -0.60157600 | 0.53635200  |
| F  | -4.67526200 | 0.67249800  | -1.21723300 |
| F  | 3.35681500  | -2.06273700 | -0.98641900 |
| F  | 4.98977200  | -0.60625900 | -0.87745700 |

TS<sub>c1-2</sub>

E= -1088.72437411 a.u.

|    |             |             |             |
|----|-------------|-------------|-------------|
| Rh | 0.03827400  | 0.16199700  | -0.86674600 |
| P  | -2.03883400 | 1.23479200  | -0.77047100 |
| P  | -0.89834900 | -1.71920700 | 0.30731500  |
| C  | -3.06251200 | 0.97719600  | 0.75316100  |
| H  | -2.54764900 | 1.46457700  | 1.58632000  |
| H  | -4.02496200 | 1.48116500  | 0.61642000  |
| C  | -2.19513300 | -1.33056300 | 1.58441500  |
| H  | -2.61967900 | -2.26710300 | 1.96118200  |

|    |             |             |             |    |             |             |              |
|----|-------------|-------------|-------------|----|-------------|-------------|--------------|
| H  | -1.68638100 | -0.83741400 | 2.41911800  | H  | 2.59093600  | 0.35352600  | -2.70142600  |
| P  | 2.09255600  | -0.87437200 | -1.22869700 | H  | 3.19441100  | -1.27963900 | -3.08860700  |
| P  | 1.16050100  | 1.75172300  | 0.54615200  | H  | 1.53835600  | -0.79946800 | -3.52265700  |
| C  | 3.21657500  | -1.13633300 | 0.23149200  | H  | -0.44484000 | 0.30129900  | -2.48394500  |
| H  | 4.24673700  | -1.13558400 | -0.13789100 | H  | -0.89840600 | -0.30526700 | -2.30203800  |
| C  | 3.02515600  | -2.12778800 | 0.65060500  | C  | -3.72991300 | -0.66169800 | -0.02353500  |
| H  | 2.90997100  | 1.32157300  | 1.04105900  | C  | 3.53446400  | -0.29793400 | 0.76099700   |
| H  | 3.18532900  | 1.91586800  | 1.91779600  | F  | 4.84474200  | -0.42869400 | 1.14154300   |
| C  | 3.58938300  | 1.60821600  | 0.23258000  | F  | 2.80428100  | -0.38328800 | 1.93014200   |
| C  | 2.08502200  | -2.54354800 | -1.99296900 | F  | -3.45177100 | -0.75226500 | -1.37255400  |
| H  | 1.52736000  | -3.24953300 | -1.37516600 | F  | -5.06832200 | -0.93603800 | 0.09313500   |
| H  | 1.58936700  | -2.47449000 | -2.96439300 |    |             |             |              |
| H  | 3.10259000  | -2.91862400 | -2.13439000 |    |             |             |              |
| C  | 0.14677000  | -2.82545500 | 1.34791900  |    |             |             |              |
| H  | 0.89962200  | -3.32084600 | 0.73054800  |    |             |             |              |
| H  | 0.65873100  | -2.24620300 | 2.11635000  |    |             |             |              |
| H  | -0.46656100 | -3.59981000 | 1.81768500  |    |             |             |              |
| C  | -1.73409900 | -2.95506600 | -0.77305500 | Rh | 1.10514600  | 0.11413400  | -0.33413300  |
| H  | -0.99264800 | -3.37136000 | -1.46024000 | P  | 0.50182700  | 1.97761900  | -1.53965800  |
| H  | -2.18054600 | -3.76513600 | -0.18896700 | P  | 1.88483100  | 1.49500800  | 1.44660700   |
| H  | -2.51265500 | -2.47422900 | -1.36606600 | C  | -0.24001500 | 3.45190700  | -0.64780500  |
| C  | 1.49689800  | 3.41917900  | -0.16645500 | H  | 0.19826100  | 4.36514100  | -1.061696500 |
| H  | 2.11383900  | 4.02581700  | 0.50340000  | C  | -1.31055900 | 3.48878000  | -0.86231100  |
| H  | 2.00636000  | 3.30337800  | -1.12627300 | H  | 1.30258800  | 3.27757600  | 1.42266600   |
| H  | 0.55813200  | 3.94406400  | -0.34942800 | H  | 1.32852300  | 3.67514300  | 2.44175800   |
| C  | 0.41353900  | 2.17431000  | 2.17780200  | H  | 2.01623900  | 3.86072500  | 0.83161300   |
| H  | -0.56330100 | 2.63978800  | 2.02146000  | P  | 1.04986700  | -1.98789900 | 0.72189400   |
| H  | 0.27742700  | 1.26148000  | 2.76078200  | C  | 3.25667100  | -0.55523000 | -1.43323400  |
| H  | 1.03992700  | 2.87070600  | 2.74274400  | C  | 2.66654400  | -2.63671600 | 1.41127600   |
| C  | -3.14682600 | 0.78610300  | -2.16110800 | H  | 2.58208100  | -3.72581200 | 1.47784700   |
| H  | -2.69091300 | 1.14924900  | -3.08584300 | H  | 2.77601100  | -2.26318400 | 2.43407800   |
| H  | -3.25109100 | -0.29656400 | -2.22847200 | C  | 3.95651400  | -2.18371500 | -0.82221700  |
| H  | -4.13516500 | 1.23727400  | -2.04034800 | H  | 4.98513600  | -2.30120900 | -1.17817000  |
| C  | -2.06579400 | 3.07105600  | -0.85371200 | C  | 3.37109600  | -3.00543400 | -1.24603500  |
| H  | -3.09173100 | 3.43543400  | -0.95734000 | H  | -0.00207800 | -2.41977500 | 2.17656200   |
| H  | -1.63165900 | 3.50664600  | 0.04907100  | H  | 0.21417000  | -1.75430500 | 3.01523800   |
| H  | -1.48209800 | 3.39670700  | -1.71801400 | H  | -1.05421800 | -2.30716200 | 1.90260600   |
| C  | 3.15043100  | 0.06210700  | -2.40513900 | H  | 0.17426900  | -3.45456700 | 2.48662500   |
| C  | 3.31442700  | 1.07949600  | -2.04426500 | C  | 3.68864000  | 1.86735700  | 1.56807600   |
| H  | 4.11544000  | -0.42988300 | -2.55689100 | H  | 4.03969400  | 2.27464900  | 0.61624000   |
| H  | 2.62596400  | 0.13043600  | -3.36136600 | C  | 3.89082100  | 2.59316300  | 2.36191700   |
| H  | 0.15743500  | 0.78203500  | -2.40209600 | H  | 4.23767600  | 0.94804700  | 1.77142900   |
| H  | -0.29863400 | -0.15802700 | -2.45827600 | C  | 1.53399100  | 1.02498600  | 3.19742000   |
| C  | 3.13988800  | -0.13687500 | 1.38020700  | H  | 1.96318800  | 0.03647600  | 3.38444900   |
| C  | -3.35689100 | -0.45607900 | 1.15615000  | H  | 1.97742300  | 1.73595900  | 3.90085500   |
| F  | -4.03545900 | -1.07616800 | 0.12760800  | H  | 0.45745800  | 0.98047200  | 3.37009800   |
| F  | -4.24217800 | -0.40637700 | 2.20317400  | C  | 3.00789000  | -1.01948400 | -3.20547300  |
| F  | 2.15377200  | -0.53459900 | 2.26439200  | H  | 3.90057200  | -1.47457400 | -3.64602800  |
| F  | 4.31219400  | -0.23944500 | 2.08262000  | H  | 2.16703600  | -1.71383500 | -3.27839900  |
| Rh | -0.05861300 | 0.07998700  | -0.43933200 | H  | 2.75094400  | -0.12594700 | -3.78140000  |
| P  | -1.89434200 | 1.53229200  | -0.13308900 | C  | 4.81700900  | 0.43448000  | -1.56584600  |
| P  | -1.14374900 | -1.44321100 | 0.96445500  | H  | 4.59068500  | 1.42009800  | -1.98180200  |
| C  | -3.50206400 | 0.77029000  | 0.42683500  | H  | 5.25493300  | 0.56577600  | -0.57473800  |
| H  | -3.55954200 | 0.80829100  | 1.51916800  | H  | 5.55023900  | -0.05834300 | -2.21269800  |
| H  | -4.32088000 | 1.38312800  | 0.03742700  | C  | -0.72386900 | 1.80246700  | -2.90216900  |
| C  | -2.96903600 | -1.74654900 | 0.71633100  | H  | -0.34940300 | 1.06692400  | -3.61907800  |
| H  | -3.09089900 | -2.67119400 | 0.14474000  | H  | -1.67253000 | 1.44201700  | -2.49268200  |
| H  | -3.44843100 | -1.89410100 | 1.68951800  | H  | -0.89065500 | 2.75413500  | -3.41612100  |
| P  | 1.66403200  | -1.32156000 | -1.15928100 | C  | 1.89478600  | 2.81093500  | -2.42369700  |
| P  | 1.57692000  | 1.68579800  | 0.09537200  | H  | 1.56162200  | 3.68611400  | -2.98999400  |
| C  | 3.18956300  | -1.49188000 | -0.11475600 | H  | 2.65445200  | 3.11906700  | -1.69969100  |
| C  | 4.04160500  | -1.69082500 | -0.77197200 | C  | 2.35419400  | 2.09820400  | -3.11292300  |
| H  | 3.07256800  | -2.35805900 | 0.54255300  | H  | 0.56679300  | -3.37516700 | -0.39630500  |
| C  | 3.34751300  | 1.08291600  | 0.15580300  | H  | 1.07213400  | -3.29033400 | -1.36003700  |
| H  | 3.92954400  | 1.79068800  | 0.75344700  | H  | 0.77495900  | -4.35246300 | 0.04963300   |
| C  | 3.77589100  | 1.08537600  | -0.85089400 | H  | -0.50701700 | -3.27907300 | -0.56742700  |
| C  | 1.34322700  | -3.07966000 | -1.59221100 | H  | 0.44856000  | -0.70133700 | -1.52558600  |
| H  | 1.20129200  | -3.67970300 | -0.69348900 | H  | -0.89802700 | 0.15261800  | -0.06755400  |
| H  | 0.43886300  | -3.13982500 | -2.20280000 | P  | -2.52981800 | -0.24497300 | -0.04036200  |
| C  | 2.18454600  | -3.49053300 | -2.15730000 | N  | -3.58830900 | 0.78677100  | -0.89984400  |
| H  | -1.08173700 | -0.79381600 | 2.69242700  | N  | -3.02584000 | -0.46529300 | 1.57865000   |
| H  | -1.49501400 | 0.21632400  | 2.73863700  | N  | -2.52359100 | -1.75479000 | -0.81940700  |
| H  | -1.62790800 | -1.43763900 | 3.38868500  | C  | -2.10045700 | 0.08778700  | 2.57544400   |
| H  | -0.03360800 | -0.73903200 | 2.99759800  | H  | -1.09665300 | 0.15206100  | 2.15418900   |
| C  | -0.60537200 | -3.18051700 | 1.26138200  | C  | -2.10167800 | -1.77926900 | -2.21743200  |
| H  | 0.44973400  | -3.19462400 | 1.54766300  | C  | -2.94902100 | -1.80400300 | -2.91498600  |
| H  | -1.19029300 | -3.62684000 | 2.07104100  | C  | -3.71350700 | 2.15003200  | -0.39040100  |
| H  | -0.74278600 | -3.77959600 | 0.35905500  | H  | -2.91911100 | 2.36310800  | 0.32886900   |
| C  | 1.81685400  | 3.20376600  | -0.92645200 | C  | -3.35187500 | -2.87442000 | -0.38804200  |
| C  | 2.63059300  | 3.82889800  | -0.54652000 | H  | -3.19501500 | -3.02812400 | 0.68496900   |
| H  | 2.02596700  | 2.92695700  | -1.96294700 | H  | -2.99256500 | -3.77576100 | -0.89814500  |
| C  | 0.89320400  | 3.78946800  | -0.91798800 | C  | -4.84566500 | -2.65175400 | -0.65451200  |
| C  | 1.44158200  | 2.40076500  | 1.79034300  | H  | -5.02678500 | -2.58390100 | -1.73229600  |
| H  | 0.56170200  | 3.03815900  | 1.86282300  | H  | -5.41636800 | -3.52131300 | -0.29313300  |
| H  | 1.35511500  | 1.59425700  | 2.51927600  | C  | -4.42611500 | -0.32993100 | 2.00577300   |
| H  | 2.32393900  | 3.00290900  | 2.02588300  | H  | -4.44280300 | -0.43480200 | 3.09583200   |
| C  | -2.36490800 | 2.29724300  | -1.73817900 | H  | -4.79368800 | 0.68382700  | 1.78568000   |
| H  | -1.49887500 | 2.81919800  | -2.15282900 | C  | -5.36768600 | -1.36776500 | 1.40113500   |
| H  | -2.67141600 | 1.51934000  | -2.43898000 | H  | -5.11790000 | -2.35484600 | 1.80275900   |
| H  | -3.18515300 | 3.00803700  | -1.60474600 | H  | -6.39143800 | -1.14155800 | 1.73813300   |
| C  | -1.89035900 | 3.00027000  | 0.97897400  | C  | -4.72699900 | 0.30930600  | -1.68167500  |
| C  | -2.87196700 | 3.48247200  | 0.95969400  | H  | -4.37344700 | -0.39936200 | -2.43466100  |
| H  | -1.66060400 | 2.71032500  | 2.00683300  | H  | -5.13666500 | 1.16377500  | -2.23176900  |
| H  | -1.14771400 | 3.72620900  | 0.63941100  | C  | -5.82062000 | -0.35745800 | -0.83477200  |
| C  | 2.32257900  | -0.70238900 | -2.76739800 | H  | -6.27021200 | 0.38219400  | -0.16339000  |
| C  |             |             |             | H  | -6.62433000 | -0.70733400 | -1.50149600  |

TS<sub>C3-4</sub>  
E= -1669.70688968 a.u.

|   |             |             |             |
|---|-------------|-------------|-------------|
| N | -5.27426800 | -1.42324400 | -0.03465400 |
| H | -2.40178100 | 1.09384300  | 2.89230600  |
| H | -2.07310600 | -0.56515700 | 3.45427000  |
| H | -4.67210200 | 2.30988700  | 0.11918300  |
| H | -3.64222200 | 2.87411200  | -1.21122100 |
| H | -1.49037000 | -0.90408000 | -2.44079500 |
| H | -1.48454500 | -2.66381300 | -2.40577900 |
| C | -0.07763500 | 3.52218300  | 0.85830000  |
| C | 3.96993900  | -2.32509200 | 0.68757700  |
| F | 4.50515400  | -1.16657700 | 1.22936400  |
| F | 4.86773200  | -3.31278600 | 1.02030600  |
| F | -0.96892500 | 2.64959800  | 1.46157800  |
| F | -0.49695700 | 4.77270700  | 1.25491600  |

**TS<sub>C6-7</sub>**

**E= -1276.82273222 a.u.**

|    |             |             |             |
|----|-------------|-------------|-------------|
| Rh | 0.06853100  | 0.24144100  | -0.36530500 |
| P  | -1.88912500 | -0.18714000 | -1.56609900 |
| P  | -0.78825400 | -0.15801800 | 1.86772400  |
| C  | -3.43285500 | -0.01859800 | -0.52698000 |
| H  | -3.58877100 | 1.05110300  | -0.36217800 |
| H  | -4.28950900 | -0.41003300 | -1.08590200 |
| C  | -2.65293400 | -0.04068500 | 1.95997200  |
| H  | -3.01090800 | -0.47384000 | 2.90064800  |
| H  | -2.90326100 | 1.02441400  | 1.95406500  |
| P  | 1.20101200  | -1.67149800 | -0.86648500 |
| P  | 2.05992100  | 1.39409200  | -0.33540600 |
| C  | 2.75110500  | -2.01238000 | 0.12962300  |
| H  | 3.43433000  | -2.60329000 | -0.48880200 |
| H  | 2.46845100  | -2.62975900 | 0.98754000  |
| C  | 3.64287300  | 0.40255200  | -0.20743300 |
| H  | 4.43923300  | 1.03763400  | 0.19258800  |
| H  | 3.94944900  | 0.08245400  | -1.20841700 |
| C  | 0.41120500  | -3.32887700 | -0.67025400 |
| H  | -0.06242900 | -3.39802700 | 0.31075700  |
| H  | -0.35772200 | -3.45961600 | -1.43300600 |
| H  | 1.15043200  | -4.12936400 | -0.77703600 |
| C  | -0.38602800 | 1.04898900  | 3.21060400  |
| H  | -0.57106600 | 2.06482800  | 2.85212900  |
| H  | -0.97259800 | 0.87279600  | 4.11916200  |
| C  | 0.67646400  | 0.95522800  | 3.45151700  |
| H  | -0.49652300 | -1.74359000 | 2.77967800  |
| H  | 0.58171700  | -1.90068900 | 2.87612200  |
| H  | -0.94470400 | -1.72859600 | 3.77935200  |
| H  | -0.93005400 | -2.57400600 | 2.21805400  |
| C  | 2.46175700  | 2.44442200  | -1.79713900 |
| H  | 3.43082100  | 2.94471400  | -1.69238600 |
| H  | 2.45431700  | 1.82985600  | -2.70088600 |
| H  | 1.67202300  | 3.19538300  | -1.88275400 |
| C  | 2.30566100  | 2.60359600  | 1.03428000  |
| H  | 1.50233000  | 3.34152600  | 0.98755700  |
| H  | 2.26084000  | 2.08070300  | 1.99085000  |
| H  | 3.26877000  | 3.11646100  | 0.94332400  |
| C  | -2.26753500 | -1.77056800 | -2.44697700 |
| H  | -1.47676800 | -1.99979800 | -3.16701100 |
| H  | -2.34353700 | -2.58236800 | -1.72140100 |
| C  | -3.21862500 | -1.69397700 | -2.98382500 |
| C  | -2.31879900 | 1.02525300  | -2.89236400 |
| H  | -3.31125000 | 0.83537500  | -3.31600100 |
| H  | -2.28740300 | 2.03549300  | -2.47957500 |
| H  | -1.56530200 | 0.95853200  | -3.68122500 |
| C  | 1.85355800  | -1.83551000 | -2.59087600 |
| H  | 2.52535700  | -1.00325500 | -2.81431600 |
| H  | 2.37957800  | -2.78340200 | -2.74853900 |
| H  | 1.01153200  | -1.76902700 | -3.28455700 |
| C  | -0.60199100 | 1.78672600  | -0.29496000 |
| H  | -1.21880000 | 3.14641800  | -0.10072700 |
| O  | -2.31025100 | 2.93879700  | 0.34843900  |
| O  | -0.39123100 | 3.92697700  | -0.46874400 |
| C  | -3.42429000 | -0.69901500 | 0.83124100  |
| C  | 3.52810700  | -0.82414300 | 0.67330600  |
| F  | 4.80441500  | -1.26839400 | 0.97008400  |
| F  | 2.99378400  | -0.45816600 | 1.89336600  |
| F  | -4.74202700 | -0.80157300 | 1.24122500  |
| F  | -3.00440600 | -2.01787500 | 0.68960700  |

**TS<sub>C8-9</sub>**

**E= -1276.83262132 a.u.**

|    |             |             |             |
|----|-------------|-------------|-------------|
| Rh | 0.08756300  | 0.05590100  | -0.34964500 |
| P  | 1.79327500  | 1.64660200  | -0.12495000 |
| P  | 1.49589900  | -1.88710300 | -0.02994300 |
| C  | 3.47962800  | 0.99930900  | -0.61159000 |
| H  | 3.48703200  | 0.92576900  | -1.70332600 |
| H  | 4.23328500  | 1.73915900  | -0.32213200 |
| C  | 3.25425500  | -1.58420700 | -0.58769000 |
| H  | 3.88107000  | -2.43917800 | -0.31140600 |
| C  | 3.23735700  | -1.51698000 | -1.67970700 |
| P  | -1.11201600 | 0.13999700  | 1.69472500  |
| P  | -1.79644400 | -0.64939600 | -1.49259800 |
| C  | -2.92408800 | 0.57904400  | 1.55792300  |
| H  | -2.97149100 | 1.63977700  | 1.29937600  |

|   |             |             |             |
|---|-------------|-------------|-------------|
| H | -3.39441500 | 0.44643000  | 2.53800600  |
| C | -3.45960500 | -0.02479200 | -0.91693400 |
| H | -4.25518000 | -0.53494600 | -1.47094700 |
| H | -3.51297100 | 1.04039100  | -1.15949400 |
| C | -1.20751300 | -1.39908000 | 2.71580500  |
| H | -1.48676900 | -2.24870300 | 2.08965000  |
| H | -0.22320800 | -1.58942300 | 3.15028500  |
| H | -1.93900300 | -1.29985500 | 3.52378300  |
| C | 1.20429900  | -3.38763100 | -1.07959500 |
| H | 1.07435500  | -3.08322900 | -2.12169500 |
| H | 2.03305000  | -4.10132500 | -1.01264600 |
| H | 0.28811900  | -3.88352000 | -0.74949100 |
| C | 1.81737500  | -2.73834400 | 1.58625600  |
| H | 0.90084900  | -3.23372900 | 1.91663600  |
| H | 2.60946600  | -3.48951400 | 1.49612600  |
| H | 2.11194100  | -2.00380100 | 2.33856100  |
| C | -1.91837400 | -0.22896400 | -3.28159800 |
| C | -2.85887100 | -0.58317300 | -3.71651300 |
| H | -1.82321700 | 0.84953300  | -3.40796800 |
| H | -1.07911500 | -0.70836500 | -3.79254100 |
| C | -2.13894000 | -2.46658200 | -1.59177800 |
| H | -1.35572200 | -2.93119500 | -2.19538600 |
| H | -2.12646900 | -2.91266100 | -0.59592000 |
| C | -3.10872200 | -2.66440800 | -2.05915600 |
| C | 2.18980100  | 2.43944600  | 1.49508000  |
| H | 1.33725400  | 3.04918000  | 1.80224200  |
| H | 2.37198700  | 1.67218500  | 2.24955900  |
| H | 3.07490300  | 3.07887900  | 1.41612500  |
| C | 1.85365300  | 3.14571900  | -1.21374200 |
| H | 2.84185000  | 3.61722200  | -1.17732100 |
| H | 1.61437700  | 2.86303700  | -2.24079600 |
| H | 1.11105500  | 3.87226000  | -0.87596000 |
| C | -0.68359400 | 1.35352400  | 3.01777600  |
| H | -0.72465600 | 2.36163500  | 2.60221300  |
| H | -1.37957600 | 1.27731800  | 3.85931900  |
| H | 0.32942700  | 1.15573400  | 3.37549100  |
| H | 0.71441600  | 0.09546500  | -1.81904700 |
| C | -1.15416200 | 2.56485000  | -0.85864900 |
| O | -1.30152700 | 3.00851100  | 0.23810200  |
| O | -1.23748400 | 2.62541300  | -2.04020100 |
| C | 3.92464900  | -0.33564100 | -0.05594300 |
| C | -3.76033600 | -0.18966800 | 0.55807800  |
| F | -5.07889400 | 0.18036100  | 0.75470100  |
| F | -3.72620000 | -1.53853800 | 0.87826400  |
| F | 3.83443300  | -0.31627900 | 1.32633900  |
| F | 5.28025800  | -0.45446500 | -0.31530600 |

**TS<sub>C9-7</sub>**

**E= -1276.81588493 a.u.**

|    |             |             |             |
|----|-------------|-------------|-------------|
| Rh | -0.05558700 | -0.18976100 | -0.57251000 |
| P  | -2.10504100 | -1.33259600 | -0.57703900 |
| P  | -1.12132500 | 1.93271300  | -0.24003500 |
| C  | -3.68571500 | -0.36836800 | -0.32657800 |
| H  | -4.00141500 | 0.03548700  | -1.29285400 |
| H  | -4.45948600 | -1.06625300 | 0.00691800  |
| C  | -2.95747800 | 2.02877100  | 0.14369200  |
| H  | -3.12115000 | 2.82789000  | 0.87341700  |
| H  | -3.47988900 | 2.31228200  | -0.77426300 |
| P  | 0.82718500  | -0.77977200 | 1.64577700  |
| P  | 1.96278000  | 0.75606000  | -1.32844700 |
| C  | 2.69047700  | -0.90767000 | 1.69943900  |
| H  | 2.95344800  | -1.84413500 | 1.19873700  |
| H  | 3.01306400  | -0.97116700 | 2.74421900  |
| C  | 3.52345300  | 0.21587100  | -0.47136200 |
| C  | 0.51850900  | 0.22419500  | 3.17210200  |
| H  | 0.95874100  | 1.21614300  | 3.05632300  |
| H  | -0.56028500 | 0.32936300  | 3.31732800  |
| C  | 0.95364000  | -0.25339700 | 4.05645200  |
| H  | -1.14922000 | 3.23451800  | -1.56421300 |
| H  | -1.49031300 | 2.78708400  | -2.50124000 |
| H  | -1.81694600 | 4.05756400  | -1.28750800 |
| H  | -0.15248500 | 3.64517900  | -1.71855400 |
| C  | -0.50374800 | 2.93474500  | 1.19127200  |
| H  | 0.58788800  | 2.95495000  | 1.20365900  |
| H  | -0.88754600 | 3.95989500  | 1.15883200  |
| H  | -0.83993900 | 2.45849200  | 2.11482900  |
| C  | 2.39302900  | 0.33098300  | -3.06543100 |
| H  | 3.35922400  | 0.76401500  | -3.34433600 |
| H  | 2.42929800  | -0.75522600 | -3.15465900 |
| C  | 1.61274900  | 0.72150700  | -3.72290900 |
| C  | 2.25157300  | 2.58372000  | -1.39553100 |
| H  | 1.66742800  | 3.00895200  | -2.21364200 |
| H  | 1.98581700  | 3.07668300  | -0.45986100 |
| H  | 3.30822900  | 2.77934100  | -1.59920300 |
| C  | -2.42268000 | -2.70090800 | 0.61416400  |
| H  | -1.60346600 | -3.41670700 | 0.56008300  |
| H  | -2.50510400 | -2.28809700 | 1.62189700  |
| H  | -3.36193900 | -3.20225000 | 0.35979000  |
| C  | -2.52992700 | -2.11132400 | -2.18854200 |
| H  | -3.52111100 | -2.57483500 | -2.14900500 |
| H  | -2.50582500 | -1.34762800 | -2.96899700 |
| H  | -1.77431800 | -2.86780800 | -2.40286300 |
| C  | 0.48511600  | -2.46582200 | 2.32647300  |

|   |             |             |             |
|---|-------------|-------------|-------------|
| H | 0.58915200  | -3.21139100 | 1.53459000  |
| H | 1.17260800  | -2.70042500 | 3.14603700  |
| H | -0.53618500 | -2.50385300 | 2.71058800  |
| H | 0.14498600  | -1.06944400 | -1.94342200 |
| C | 0.90817400  | -2.35203100 | -1.22227900 |
| O | 0.09835600  | -3.24968000 | -1.05916900 |
| O | 2.11551100  | -2.25604000 | -1.38163700 |
| C | -3.62224900 | 0.77580900  | 0.65662500  |
| C | 3.47852400  | 0.20204600  | 1.03915200  |
| F | -4.91501600 | 1.10652200  | 1.01929300  |
| F | -3.01964200 | 0.36655900  | 1.83211800  |
| H | 3.73492500  | -0.79615900 | -0.81972800 |
| H | 4.33780600  | 0.87953900  | -0.77758000 |
| F | 3.02932700  | 1.43661300  | 1.49991000  |
| F | 4.78064900  | 0.11765700  | 1.49296900  |

**TS<sub>C10-11</sub>**

**E= -1277.21999613 a.u.**

|    |             |             |             |
|----|-------------|-------------|-------------|
| Rh | -0.14968000 | 0.07725400  | -0.33808700 |
| P  | -2.15888500 | 1.34771800  | -0.05500200 |
| P  | -1.07362800 | -1.45143100 | 1.01956000  |
| C  | -3.63678300 | 0.35792700  | 0.49585100  |
| H  | -3.66852400 | 0.29194600  | 1.58672900  |
| H  | -4.53645000 | 0.89478100  | 0.18035500  |
| C  | -2.70176900 | -2.07899700 | 0.41408800  |
| H  | -2.51410500 | -2.78622900 | -0.39801300 |
| C  | -3.16370600 | -2.63139600 | 1.23790600  |
| P  | 1.54968500  | -1.17702200 | -1.47797200 |
| P  | 1.47130200  | 1.12669900  | 1.30813600  |
| C  | 3.31911300  | -0.78363500 | -1.12136900 |
| H  | 3.59014600  | 0.07910100  | -1.73302900 |
| H  | 3.92652900  | -1.64125600 | -1.42704600 |
| C  | 3.25056700  | 0.89663400  | 0.84045400  |
| H  | 3.86054300  | 1.10741100  | 1.72410100  |
| H  | 3.47105500  | 1.63925400  | 0.07074300  |
| C  | 1.53766400  | -3.01539600 | -1.44816100 |
| H  | 1.86566300  | -3.39490100 | -0.47998800 |
| H  | 0.53715500  | -3.38969400 | -1.67838600 |
| H  | 2.22684500  | -3.38448100 | -2.21307400 |
| C  | -1.44171100 | -0.85134000 | 2.72182400  |
| H  | -1.64478300 | 0.21878500  | 2.74936400  |
| H  | -2.30185800 | -1.39372400 | 3.12377600  |
| O  | -0.58254800 | -1.05420200 | 3.36130100  |
| C  | -0.17416600 | -3.00156700 | 1.37610000  |
| H  | 0.85852400  | -2.77180800 | 1.64861200  |
| H  | -0.66492900 | -3.50697400 | 2.21302700  |
| C  | -0.18151600 | -3.66561600 | 0.51257000  |
| H  | 1.41569600  | 2.95160400  | 1.50719300  |
| C  | 2.30566500  | 3.29009200  | 2.04589600  |
| H  | 1.36141400  | 3.43132100  | 0.52745600  |
| H  | 0.53351900  | 3.22833800  | 2.08916700  |
| C  | 1.51474300  | 0.58982300  | 3.07552800  |
| H  | 0.59231500  | 0.87694600  | 3.58404000  |
| H  | 1.66244500  | -0.48938700 | 3.15591000  |
| H  | 2.34629900  | 1.08581200  | 3.58418700  |
| C  | -2.71494700 | 2.07102900  | -1.63986100 |
| H  | -1.97410200 | 2.81452200  | -1.94607000 |
| H  | -2.81039300 | 1.28999000  | -2.39431300 |
| C  | -3.68267100 | 2.55832800  | -1.49138200 |
| H  | -2.15166200 | 2.77544900  | 1.08638100  |
| C  | -3.13666400 | 3.24968900  | 1.11237200  |
| H  | -1.86726100 | 2.47977200  | 2.09902400  |
| H  | -1.41988300 | 3.48735400  | 0.69400900  |
| C  | 1.41979900  | -0.84088600 | -3.27487900 |
| H  | 1.51245600  | 0.23177600  | -3.44519800 |
| H  | 2.22198800  | -1.36384300 | -3.80404100 |
| H  | 0.45465300  | -1.19570400 | -3.64311800 |
| H  | -0.11839500 | 1.45464700  | -2.16324600 |
| H  | -1.01999300 | -0.60362300 | -1.44682500 |
| C  | 0.61431800  | 2.23093500  | -1.71602900 |
| O  | 1.78045500  | 1.78000400  | -1.57513200 |
| O  | 0.12312500  | 3.32322200  | -1.42419100 |
| C  | 3.64340100  | -0.47250700 | 0.32626500  |
| C  | -3.70978500 | -1.04372700 | -0.09012600 |
| F  | 4.99233500  | -0.61553100 | 0.48928000  |
| F  | 3.07257200  | -1.45677100 | 1.13812300  |
| F  | -3.60095500 | -0.95700800 | -1.45582300 |
| F  | -4.96022600 | -1.54188600 | 0.15411800  |

**TS<sub>C13-14</sub>**

**E= -1858.22695066 a.u.**

|    |             |             |             |
|----|-------------|-------------|-------------|
| Rh | -0.71806400 | -0.06087900 | 0.11127900  |
| P  | -0.74184300 | 1.91204700  | 1.40524100  |
| P  | -1.36907400 | 1.19186700  | -1.70102700 |
| C  | -2.28677100 | 2.91119800  | 1.14196500  |
| H  | -3.11290000 | 2.29913300  | 1.51201800  |
| C  | -2.23751500 | 3.81577500  | 1.75675800  |
| H  | -2.83019500 | 2.27390300  | -1.32564700 |
| H  | -3.15140400 | 2.78009400  | -2.24161700 |
| H  | -3.63918600 | 1.61196900  | -1.00423900 |
| F  | -0.98453400 | -2.20021800 | -0.91606200 |

|   |             |             |             |
|---|-------------|-------------|-------------|
| P | -3.29353900 | -0.85557700 | 1.42892400  |
| C | -2.64179100 | -2.64636000 | -1.65923700 |
| H | -2.68742100 | -3.74025900 | -1.67513200 |
| H | -2.65930600 | -2.31877500 | -2.70187000 |
| C | -4.07812000 | -2.28118000 | 0.49066600  |
| H | -5.14750200 | -2.32223100 | 0.71852100  |
| H | -3.64321000 | -3.22778700 | 0.82117800  |
| C | 0.07949000  | -2.75349400 | -2.31773100 |
| H | -0.09819600 | -2.13877500 | -3.20282300 |
| H | 1.13380000  | -2.66107600 | -2.04853000 |
| H | -0.13067600 | -3.79727500 | -2.56836000 |
| C | -1.96684200 | 0.40564700  | -3.25539300 |
| H | -2.89931800 | -0.12790700 | -3.07754600 |
| H | -2.13817800 | 1.17329000  | -4.01507600 |
| H | -1.21204300 | -0.28850600 | -3.63235300 |
| C | -0.16182900 | 2.37775400  | -2.42334900 |
| H | 0.63734400  | 1.81915100  | -2.91495700 |
| H | -0.65578900 | 3.01364400  | -3.16265600 |
| C | 0.26716700  | 3.01763200  | -1.65527400 |
| H | -2.99304200 | -1.67610300 | 3.05652500  |
| H | -3.79465100 | -2.37164400 | 3.32258300  |
| H | -2.02830200 | -2.18936600 | 3.02943500  |
| H | -2.93441400 | -0.91447900 | 3.83919800  |
| C | -4.81604700 | 0.13437700  | 1.80664400  |
| H | -4.57086700 | 0.92787900  | 2.51921400  |
| H | -5.20602500 | 0.59411700  | 0.89462000  |
| H | -5.60148200 | -0.48487900 | 2.25128200  |
| C | 0.60840500  | 3.15159500  | 1.33194100  |
| H | 1.56233300  | 2.63456800  | 1.47236200  |
| H | 0.61731200  | 3.65185400  | 0.36289500  |
| H | 0.47542700  | 3.90763900  | 2.11097400  |
| C | -0.90738800 | 1.64017100  | 3.21720400  |
| H | -1.25487400 | 2.55831400  | 3.69917700  |
| H | -1.61279600 | 0.83183800  | 3.41129100  |
| H | 0.05320600  | 1.35976500  | 3.65044200  |
| C | -0.76674700 | -3.57320600 | 0.28740900  |
| H | -1.46911600 | -3.46094000 | 1.11291900  |
| H | -0.91970400 | -4.53606200 | -0.20857900 |
| H | 0.22383000  | -3.52642600 | 0.73453900  |
| H | 1.33232400  | -0.00450900 | 2.53146300  |
| H | 0.93374700  | 0.08077900  | -0.31163300 |
| C | 0.84932100  | -1.00189800 | 2.61420400  |
| O | 1.23549100  | -1.79187800 | 3.46339100  |
| O | -0.10223100 | -1.22607500 | 1.76976300  |
| P | 2.79312800  | -0.01464900 | -0.26808200 |
| N | 3.39635300  | -0.52358700 | -1.80540600 |
| N | 3.13068100  | -1.16099500 | 0.93226600  |
| N | 3.44983300  | 1.59429900  | 0.20709200  |
| C | 2.74696600  | -2.52005100 | 0.57926300  |
| H | 1.92367700  | -2.49417200 | -0.13462200 |
| C | 3.16142100  | 2.50173500  | -0.83227600 |
| C | 3.93189800  | 2.53185000  | -1.61547300 |
| H | 2.49568600  | -0.29046400 | -2.92890400 |
| H | 1.46173700  | -0.25981200 | -2.57649100 |
| C | 4.74286500  | 1.76797300  | 0.86061300  |
| H | 4.67535300  | 1.51689200  | 1.91928300  |
| H | 4.91361200  | 2.84869900  | 0.82140800  |
| C | 5.92929900  | 1.03599400  | 0.21680700  |
| H | 6.11913300  | 1.45225000  | -0.77752100 |
| H | 6.83239600  | 1.22830900  | 0.81923300  |
| C | 4.18047000  | -1.07859200 | 1.93493400  |
| H | 4.04678100  | -0.16706000 | 2.51880900  |
| H | 4.02176700  | -1.89780500 | 2.64217900  |
| C | 5.58694900  | -1.15375800 | 1.30075700  |
| H | 6.33868100  | -0.82061700 | 2.03093100  |
| H | 5.82257200  | -2.19573000 | 1.06386300  |
| C | 4.79976100  | -0.47329800 | -2.22467900 |
| H | 5.06814300  | 0.55907300  | -2.50482500 |
| H | 4.90056500  | -1.07248700 | -3.13799700 |
| C | 5.78626300  | -1.01220600 | -1.19425100 |
| H | 5.60097400  | -2.08135600 | -1.05832400 |
| H | 6.79969700  | -0.91052800 | -1.61801800 |
| N | 5.65065100  | -0.37059600 | 0.09045100  |
| H | 3.56978600  | -3.08323400 | 0.11727900  |
| H | 2.40364800  | -3.03644100 | 1.48164700  |
| H | 2.58236400  | -1.10284300 | -3.65984100 |
| H | 2.71633200  | 0.65650000  | -3.44817200 |
| H | 2.20681800  | 2.27568400  | -1.30873700 |
| H | 3.08322700  | 3.49741900  | -0.38478200 |
| C | -2.63382500 | 3.34401900  | -0.26768100 |
| C | -3.93444600 | -2.16732500 | -1.01312300 |
| F | -4.16792200 | -0.84586500 | -1.37683000 |
| F | -4.95041300 | -2.87238900 | -1.60958300 |
| F | -1.67688200 | 4.24115800  | -0.70363000 |
| F | -3.80009700 | 4.06515300  | -0.19646300 |

**TS<sub>C7-8'</sub>**

**E= -1278.00669451 a.u.**

|   |            |             |             |
|---|------------|-------------|-------------|
| P | 1.40601300 | -1.64124800 | 0.81453500  |
| P | 1.40602600 | 0.98749300  | -1.27509600 |
| C | 3.19370800 | -1.15568700 | 0.75588000  |
| H | 3.32002000 | -0.37685800 | 1.51508900  |
| H | 3.80329900 | -2.02609500 | 1.01887400  |

|   |             |             |             |    |             |             |             |
|---|-------------|-------------|-------------|----|-------------|-------------|-------------|
| C | 3.22638700  | 0.77268400  | -0.94542800 | H  | -2.68853000 | -2.35319500 | 1.84021100  |
| H | 3.78800300  | 1.08279700  | -1.83327700 | H  | -3.08834700 | -3.54205400 | 0.57360100  |
| H | 3.47738200  | 1.45119900  | -0.11994200 | C  | 1.44847200  | -3.30756700 | 0.02213200  |
| P | -1.73478000 | 1.64042300  | 0.00483300  | H  | 0.50889900  | -3.83426000 | 0.20593400  |
| P | -1.80103200 | -1.61048400 | -0.30387800 | H  | 1.59911800  | -3.20171700 | -1.05325200 |
| C | -3.30292900 | 1.12129200  | 0.85435700  | H  | 2.26760400  | -3.90315900 | 0.43544300  |
| H | -3.95356000 | 1.98019300  | 1.04438800  | C  | 1.27219800  | -2.08132100 | 2.59550100  |
| H | -2.97220600 | 0.71792000  | 1.81513100  | H  | 2.00789800  | -2.84362500 | 2.87063200  |
| C | -3.47104900 | -0.92859200 | -0.78513800 | H  | 1.43704000  | -1.17674400 | 3.18443100  |
| H | -4.18206600 | -1.74388500 | -0.95353100 | H  | 0.26483200  | -2.45133800 | 2.80082300  |
| H | -3.32322100 | -0.42570000 | -1.74472700 | C  | -2.33916500 | 2.31674900  | -1.60562300 |
| C | -1.37086000 | 3.18552500  | 0.93216300  | H  | -2.52149800 | 1.51204900  | -2.31984800 |
| H | -1.20241800 | 2.93159700  | 1.98106800  | H  | -3.26099700 | 2.88942000  | -1.46991200 |
| H | -0.45568800 | 3.63575000  | 0.54158200  | H  | -1.57705500 | 2.97403700  | -2.02995200 |
| H | -2.19172900 | 3.90450400  | 0.84913000  | H  | 0.74998300  | 0.86625100  | 2.10540300  |
| C | 1.47017800  | 2.82642700  | -1.48284000 | H  | -0.16138500 | 0.51501900  | 1.92857900  |
| H | 1.73837000  | 3.29025500  | -0.53009100 | O  | 1.95265400  | 1.22798100  | 2.40869100  |
| H | 2.22676400  | 3.10274800  | -2.22437400 | C  | 2.16592900  | 2.47387900  | 2.15190200  |
| H | 0.50551200  | 3.21358800  | -1.81825300 | H  | 1.32449400  | 3.15366100  | 2.40950000  |
| C | 1.26670400  | 0.46512400  | -3.04436900 | O  | 3.17853100  | 2.94472900  | 1.64266800  |
| H | 0.26364300  | 0.71728900  | -3.40138500 | Rh | -0.15617300 | -0.03136800 | 0.18287900  |
| H | 2.01178200  | 0.95562700  | -3.68015400 | C  | -4.14008000 | 0.06085300  | 0.15284600  |
| H | 1.39359800  | -0.61717600 | -3.11099900 | C  | 3.68939800  | -0.61152100 | -0.56447200 |
| C | -1.58126900 | -2.67533200 | -1.80360900 | F  | -4.82213700 | -0.64631200 | 1.12271400  |
| H | -0.67304000 | -3.27106800 | -1.70501800 | F  | -5.12380000 | 0.70551100  | -0.57788800 |
| H | -2.43275200 | -3.34588500 | -1.96254800 | F  | 3.37290100  | -1.50512500 | -1.58546200 |
| H | -1.45796400 | -2.02581600 | -2.67432300 | F  | 5.06661600  | -0.60529800 | -0.52746100 |
| C | -2.31231000 | -2.86983300 | 0.95390700  |    |             |             |             |
| H | -1.44496100 | -3.46324100 | 1.25507600  |    |             |             |             |
